# Supplementary material for: The evolution of mitogenomic architecture in Bilateria
Source: Research Square preprint supplement (doi:10.21203/rs.3.rs-6693840/v1), 2025-06-17
Supplement: Supplementary file 1 [file b02518d8ed21f3df7afef3b7.xlsx]

## Sheet: Caption
Supplementary dataset 1
Worksheet S1. The complete dataset.
Worksheet S2. brms and lmekin results.
Worksheet S3. Details of all statistical analyses.
Legend:
LHT refers to the dataset divided according to the life history lines into: F (free-living), EndoP (endoparasitic), EctoP (ectoparasitic), parasitoid, and MP (micropredatory).
LOC refers to the dataset divided according to the locomotory capacity: low (L), high (H), intermediate (I).
GORR is the gene order rearrangement rate.
brl is branch length.
In the brms analyses, Estimates (Est) are given with the standard deviation of the posterior distribution (Error) and lower and upper 95% credible intervals (l and u respectively);
R2 values are also given with the standard deviation (R2 Error) and indicate lower and upper boundaries of the 95% credible interval (Q2.5 and Q97.5 respectively).

## Sheet: Worksheet S1
GORR	ID	Species	Tree_Name	Class	Order	Family	Genus	Phylum	parasitic/freeliving	locomotory capacity (h/l)	Full length (bp)	Coding region length (exclude NCR)	GC skew (plus strand coding)	NCR ratio_x	A (%) (+)	T (%) (+)	C (%) (+)	G (%) (+)	A+T (%) (+)	G+C (%) (+)	G+T (%) (+)	AT skew (+)	GC skew (+)	AT skew (-)	GC skew (-)	species3	NCR ratio_y	Code table	BRL (AA_fast_C50)	Tree_Name_strip	Species2	Strand_Trait
5	NC_029767.1	Plagiorhynchus transversus	Plagiorhynchus_transversus_NC_029767_1	Palaeacanthocephala	Polymorphida	Plagiorhynchidae	Plagiorhynchus	Acanthocephala	EndoP	L	15477	13115	0.557	0.151257	24.5	36.6	8.5	30.4	61.1	38.9	67	-0.197	0.564	0.197	-0.564	Plagiorhynchus_transversus_NC_029767_1	0.152614	5	8.289	Plagiorhynchus_transversus_NC_029767	Plagiorhynchus_transversus_NC_029767	single
5	NC_026516.1	Southwellina hispida	Southwellina_hispida_NC_026516_1	Palaeacanthocephala	Polymorphida	Polymorphidae	Southwellina	Acanthocephala	EndoP	L	14742	12875	0.649	0.12522	24.6	39.3	6.5	29.6	63.9	36.1	68.9	-0.23	0.64	0.23	-0.64	Southwellina_hispida_NC_026516_1	0.126645	5	7.798	Southwellina_hispida_NC_026516	Southwellina_hispida_NC_026516	single
5	NC_019808.1	Macracanthorhynchus hirudinaceus	Macracanthorhynchus_hirudinaceus_NC_019808_1	Archiacanthocephala	Oligacanthorhynchida	Oligacanthorhynchidae	Macracanthorhynchus	Acanthocephala	EndoP	L	14282	13246	0.502	0.0724688	25.2	40	8.6	26.2	65.2	34.8	66.2	-0.227	0.505	0.227	-0.505	Macracanthorhynchus_hirudinaceus_NC_019808_1	0.0725389	5	6.537	Macracanthorhynchus_hirudinaceus_NC_019808	Macracanthorhynchus_hirudinaceus_NC_019808	single
5	NC_016754.1	Oncicola luehei	Oncicola_luehei_NC_016754_1	Archiacanthocephala	Oligacanthorhynchida	Oligacanthorhynchidae	Oncicola	Acanthocephala	EndoP	L	14281	13154	0.491	0.078846	22.5	37.7	10.2	29.6	60.2	39.8	67.3	-0.253	0.487	0.253	-0.487	Oncicola_luehei_NC_016754_1	0.078916	5	6.563	Oncicola_luehei_NC_016754	Oncicola_luehei_NC_016754	single
5	NC_029766.1	Polyacanthorhynchus caballeroi	Polyacanthorhynchus_caballeroi_NC_029766_1	Polyacanthocephala		Polyacanthorhynchidae	Polyacanthorhynchus	Acanthocephala	EndoP	L	13956	12947	0.684	0.0722987	18.2	38.1	7	36.7	56.3	43.7	74.8	-0.354		0.354	-0.681	Polyacanthorhynchus_caballeroi_NC_029766_1	0.0722987	5	8.247	Polyacanthorhynchus_caballeroi_NC_029766	Polyacanthorhynchus_caballeroi_NC_029766	single
5	NC_060483.1	Pomphorhynchus bulbocolli	Pomphorhynchus_bulbocolli_NC_060483_1	Palaeacanthocephala	Echinorhynchida	Pomphorhynchidae	Pomphorhynchus	Acanthocephala	EndoP	L	13915	13233	0.514	0.04894	22.4	37.5	9.8	30.4	59.9	40.2	67.9	-0.252	0.514	0.252	-0.514	Pomphorhynchus_bulbocolli_NC_060483_1	0.0490119	5	8.523	Pomphorhynchus_bulbocolli_NC_060483	Pomphorhynchus_bulbocolli_NC_060483	single
5	NC_060482.1	Pomphorhynchus tereticollis	Pomphorhynchus_tereticollis_NC_060482_1	Palaeacanthocephala	Echinorhynchida	Pomphorhynchidae	Pomphorhynchus	Acanthocephala	EndoP	L	13891	13251	0.426	0.046001	22.6	34.3	12.5	30.7	56.9	43.2	65	-0.206	0.422	0.206	-0.422	Pomphorhynchus_tereticollis_NC_060482_1	0.046073	5	8.553	Pomphorhynchus_tereticollis_NC_060482	Pomphorhynchus_tereticollis_NC_060482	single
5	NC_006892.1	Leptorhynchoides thecatus	Leptorhynchoides_thecatus_NC_006892_1	Palaeacanthocephala	Echinorhynchida	Rhadinorhynchidae	Leptorhynchoides	Acanthocephala	EndoP	L	13888	13135	0.416	0.0541475	26.8	44.6	8.4	19.9	71.4	28.3	64.5	-0.249	0.408	0.249	-0.408	Leptorhynchoides_thecatus_NC_006892_1	0.0542195	5	7.977	Leptorhynchoides_thecatus_NC_006892	Leptorhynchoides_thecatus_NC_006892	single
5	NC_022921.1	Pallisentis celatus	Pallisentis_celatus_NC_022921_1	Eoacanthocephala	Gyracanthocephala	Quadrigyridae	Pallisentis	Acanthocephala	EndoP	L	13855	13022	0.511	0.117647	20.7	40.8	9.7	28.8	61.5	38.5	69.6	-0.326	0.497	0.326	-0.497	Pallisentis_celatus_NC_022921_1	0.116997	5	8.266	Pallisentis_celatus_NC_022921	Pallisentis_celatus_NC_022921	single
5	NC_060484.1	Pomphorhynchus rocci	Pomphorhynchus_rocci_NC_060484_1	Palaeacanthocephala	Echinorhynchida	Pomphorhynchidae	Pomphorhynchus	Acanthocephala	EndoP	L	13845	13172	0.519	0.0485374	23	37.7	9.5	29.8	60.7	39.3	67.5	-0.243	0.516	0.243	-0.516	Pomphorhynchus_rocci_NC_060484_1	0.0486096	5	8.652	Pomphorhynchus_rocci_NC_060484	Pomphorhynchus_rocci_NC_060484	single
5	NC_060708.1	Pomphorhynchus laevis	Pomphorhynchus_laevis_NC_060708_1	Palaeacanthocephala	Echinorhynchida	Pomphorhynchidae	Pomphorhynchus	Acanthocephala	EndoP	L	13772	13284	0.421	0.0353616	22.4	34.2	12.6	30.8	56.6	43.4	65	-0.208	0.418	0.208	-0.418	Pomphorhynchus_laevis_NC_060708_1	0.0354342	5	8.528	Pomphorhynchus_laevis_NC_060708	Pomphorhynchus_laevis_NC_060708	single
5	NC_019807.1	Paratenuisentis ambiguus	Paratenuisentis_ambiguus_NC_019807_1	Eoacanthocephala	Neoechinorhynchida	Tenuisentidae	Paratenuisentis	Acanthocephala	EndoP	L	13574	12505	0.461	0.0786798	24.8	42.1	9	24.2	66.9	33.2	66.3	-0.26	0.459	0.26	-0.459	Paratenuisentis_ambiguus_NC_019807_1	0.0787535	5	8.459	Paratenuisentis_ambiguus_NC_019807	Paratenuisentis_ambiguus_NC_019807	single
9	NC_032055.1	Spirobranchus giganteus	Spirobranchus_giganteus_NC_032055_1	Polychaeta	Sabellida	Serpulidae	Spirobranchus	Annelida	F	L	22058	14060	0.274	0.346722	22.7	35.2	15	27.1	57.9	42.1	62.3	-0.216	0.288	0.216	-0.288	Spirobranchus_giganteus_NC_032055_1	0.36259	5	7.906	Spirobranchus_giganteus_NC_032055	Spirobranchus_giganteus_NC_032055	single
4	NC_026833.1	Siboglinum fiordicum	Siboglinum_fiordicum_NC_026833_1	Polychaeta	Sabellida	Siboglinidae	Siboglinum	Annelida	F	L	19502	14516	-0.255	0.194083	32.4	42.1	16.2	9.3	74.5	25.5	51.4	-0.131	-0.273	0.131	0.273	Siboglinum_fiordicum_NC_026833_1	0.255666	5	3.199	Siboglinum_fiordicum_NC_026833	Siboglinum_fiordicum_NC_026833	single
4	NC_051996.1	Platynereis massiliensis	Platynereis_massiliensis_NC_051996_1	Polychaeta	Phyllodocida	Nereididae	Platynereis	Annelida	F	I	17502	14338	-0.174	0.177065	32.5	33.1	20.5	13.8	65.6	34.3	46.9	-0.009	-0.196	0.009	0.196	Platynereis_massiliensis_NC_051996_1	0.26477	5	2.795	Platynereis_massiliensis_NC_051996	Platynereis_massiliensis_NC_051996	single
4	NC_051994.1	Perinereis cultrifera	Perinereis_cultrifera_NC_051994_1	Polychaeta	Phyllodocida	Nereididae	Perinereis	Annelida	F	I	17056	14224	-0.183	0.165983	29	35.1	21.3	14.6	64.1	35.9	49.7	-0.096	-0.188	0.096	0.188	Perinereis_cultrifera_NC_051994_1	0.166041	5	2.748	Perinereis_cultrifera_NC_051994	Perinereis_cultrifera_NC_051994	single
5	NC_031404.1	Typosyllis antoni	Typosyllis_antoni_NC_031404_1	Polychaeta	Phyllodocida	Syllidae	Typosyllis	Annelida	F	I	16897	14652	-0.203	0.130556	35	35.7	18	11.3	70.7	29.3	47	-0.009	-0.228	0.009	0.228	Typosyllis_antoni_NC_031404_1	0.132864	5	3.801	Typosyllis_antoni_NC_031404	Typosyllis_antoni_NC_031404	single
4	NC_060816.1	Chrysopetalum debile	Chrysopetalum_debile_NC_060816_1	Polychaeta	Phyllodocida	Chrysopetalidae	Chrysopetalum	Annelida	F	I	16295	12938	-0.193	0.111322	27.5	36.6	21.2	14.7	64.1	35.9	51.3	-0.142	-0.181	0.142	0.181	Chrysopetalum_debile_NC_060816_1	0.173059	5	2.694	Chrysopetalum_debile_NC_060816	Chrysopetalum_debile_NC_060816	single
3	NC_049135.1	Phascolosoma similis	Phascolosoma_similis_NC_049135_1		Sipuncula	Phascolosomatidae	Phascolosoma	Annelida	F	L	16237	14660	-0.237	0.0971239	29.9	33.7	22.6	13.9	63.6	36.5	47.6	-0.059	-0.239	0.059	0.239	Phascolosoma_similis_NC_049135_1	0.0971239	5	3.025	Phascolosoma_similis_NC_049135	Phascolosoma_similis_NC_049135	single
5	NC_028712.1	Owenia fusiformis	Owenia_fusiformis_NC_028712_1	Polychaeta	Sabellida	Oweniidae	Owenia	Annelida	F	L	16204	13838	0.376	0.140397	28.9	40.7	8.9	21.3	69.6	30.2	62	-0.171	0.409	0.171	-0.409	Owenia_fusiformis_NC_028712_1	0.141508	5	2.57	Owenia_fusiformis_NC_028712	Owenia_fusiformis_NC_028712	double
4	NC_035308.1	Zeylanicobdella arugamensis	Zeylanicobdella_arugamensis_NC_035308_1	Clitellata	Hirudinida	Piscicolidae	Zeylanicobdella	Annelida	MP	I	16161	14352	-0.001	0.111936	35.5	43.7	10.4	10.3	79.2	20.7	54	-0.103	-0.004	0.103	0.004	Zeylanicobdella_arugamensis_NC_035308_1	0.111936	5	3.489	Zeylanicobdella_arugamensis_NC_035308	Zeylanicobdella_arugamensis_NC_035308	single
5	NC_028710.1	Chaetopterus variopedatus	Chaetopterus_variopedatus_NC_028710_1	Polychaeta		Chaetopteridae	Chaetopterus	Annelida	F	I	16143	14605	-0.243	0.0717339	28.4	36	22.2	13.4	64.4	35.6	49.4	-0.118	-0.247	0.118	0.247	Chaetopterus_variopedatus_NC_028710_1	0.0758843	5	2.879	Chaetopterus_variopedatus_NC_028710	Chaetopterus_variopedatus_NC_028710	single
4	NC_035893.1	Neanthes glandicincta	Neanthes_glandicincta_NC_035893_1	Polychaeta	Phyllodocida	Nereididae	Neanthes	Annelida	F	I	16126	14166	-0.196	0.121481	31.5	31.7	22.2	14.5	63.2	36.7	46.2	-0.002	-0.209	0.002	0.209	Neanthes_glandicincta_NC_035893_1	0.121543	5	2.683	Neanthes_glandicincta_NC_035893	Neanthes_glandicincta_NC_035893	single
4	NC_025561.1	Tylorrhynchus heterochaetus	Tylorrhynchus_heterochaetus_NC_025561_1	Polychaeta	Phyllodocida	Nereididae	Tylorrhynchus	Annelida	F	I	16106	14187	-0.213	0.119148	32.8	32.2	21.3	13.7	65	35	45.9	0.009	-0.219	-0.009	0.219	Tylorrhynchus_heterochaetus_NC_025561_1	0.119148	5	2.637	Tylorrhynchus_heterochaetus_NC_025561	Tylorrhynchus_heterochaetus_NC_025561	single
3	NC_031412.1	Phascolosoma pacificum	Phascolosoma_pacificum_NC_031412_1		Sipuncula	Phascolosomatidae	Phascolosoma	Annelida	F	L	16039	14450	-0.228	0.0990087	30.6	34.9	21.4	13.1	65.5	34.5	48	-0.066	-0.24	0.066	0.24	Phascolosoma_pacificum_NC_031412_1	0.099071	5	2.837	Phascolosoma_pacificum_NC_031412	Phascolosoma_pacificum_NC_031412	single
4	NC_052845.1	Platynereis cf. australis PA-2020	Platynereis_cf__australis_PA_2020_NC_052845_1	Polychaeta	Phyllodocida	Nereididae	Platynereis	Annelida	F	I	16037	14397	-0.159	0.102201	32.4	33	20.1	14.5	65.4	34.6	47.5	-0.01	-0.163	0.01	0.163	Platynereis_cf__australis_PA_2020_NC_052845_1	0.102264	5	2.743	Platynereis_cf__australis_PA_2020_NC_052845	Platynereis_cf__australis_PA_2020_NC_052845	single
3	NC_049136.1	Siphonosoma cumanense	Siphonosoma_cumanense_NC_049136_1		Sipuncula	Sipunculidae	Siphonosoma	Annelida	F	L	15917	14651	-0.274	0.0794748	27.5	33.2	25.4	13.9	60.7	39.3	47.1	-0.094	-0.292	0.094	0.292	Siphonosoma_cumanense_NC_049136_1	0.0795376	5	2.855	Siphonosoma_cumanense_NC_049136	Siphonosoma_cumanense_NC_049136	single
4	NC_057074.1	Hediste diversicolor	Hediste_diversicolor_NC_057074_1	Polychaeta	Phyllodocida	Nereididae	Hediste	Annelida	F	I	15904	14388	-0.163	0.0687877	32.2	33.1	20.4	14.4	65.3	34.8	47.5	-0.014	-0.173	0.014	0.173	Hediste_diversicolor_NC_057074_1	0.0953219	5	2.75	Hediste_diversicolor_NC_057074	Hediste_diversicolor_NC_057074	single
4	NC_060759.1	Marphysa victori	Marphysa_victori_NC_060759_1	Polychaeta	Eunicida	Eunicidae	Marphysa	Annelida	F	I	15891	14488	-0.348	0.0874709	29.4	29.7	27.6	13.3	59.1	40.9	43	-0.004	-0.35	0.004	0.35	Marphysa_victori_NC_060759_1	0.088289	5	2.752	Marphysa_victori_NC_060759	Marphysa_victori_NC_060759	single
4	NC_051995.1	Platynereis bicanaliculata	Platynereis_bicanaliculata_NC_051995_1	Polychaeta	Phyllodocida	Nereididae	Platynereis	Annelida	F	I	15868	14368	-0.129	0.0944669	31.7	36	18.4	13.9	67.7	32.3	49.9	-0.064	-0.14	0.064	0.14	Platynereis_bicanaliculata_NC_051995_1	0.0945299	5	2.787	Platynereis_bicanaliculata_NC_051995	Platynereis_bicanaliculata_NC_051995	single
4	NC_023943.1	Perinereis aibuhitensis	Perinereis_aibuhitensis_NC_023943_1	Polychaeta	Phyllodocida	Nereididae	Perinereis	Annelida	F	I	15852	14302	-0.197	0.0977164	29.5	35.2	21.2	14.1	64.7	35.3	49.3	-0.089	-0.201	0.089	0.201	Perinereis_aibuhitensis_NC_023943_1	0.0963285	5	2.7	Perinereis_aibuhitensis_NC_023943	Perinereis_aibuhitensis_NC_023943	single
5	NC_028714.1	Eurythoe complanata	Eurythoe_complanata_NC_028714_1	Polychaeta	Eunicida	Amphinomidae	Eurythoe	Annelida	F	I	15829	14437	-0.283	0.0241961	28.4	29.8	26.8	15	58.2	41.8	44.8	-0.025	-0.282	0.025	0.282	Eurythoe_complanata_NC_028714_1	0.0889507	5	2.726	Eurythoe_complanata_NC_028714	Eurythoe_complanata_NC_028714	single
4	NC_020609.1	Perinereis nuntia	Perinereis_nuntia_NC_020609_1	Polychaeta	Phyllodocida	Nereididae	Perinereis	Annelida	F	I	15824	14322	-0.201	0.0944767	30.2	34.9	21.1	13.8	65.1	34.9	48.7	-0.072	-0.21	0.072	0.21	Perinereis_nuntia_NC_020609_1	0.0949191	5	2.76	Perinereis_nuntia_NC_020609	Perinereis_nuntia_NC_020609	single
4	NC_060814.1	Iheyomytilidicola lauensis	Iheyomytilidicola_lauensis_NC_060814_1	Polychaeta	Phyllodocida	Nautiliniellidae	Iheyomytilidicola	Annelida	F	I	15783	14159	-0.226	0.082874	33.8	36.1	18.7	11.4	69.9	30.1	47.5	-0.033	-0.241	0.033	0.241	Iheyomytilidicola_lauensis_NC_060814_1	0.102896	5	4.545	Iheyomytilidicola_lauensis_NC_060814	Iheyomytilidicola_lauensis_NC_060814	single
4	NC_050679.1	Hediste japonica	Hediste_japonica_NC_050679_1	Polychaeta	Phyllodocida	Nereididae	Hediste	Annelida	F	I	15783	14385	-0.121	0.088513	31.9	34.4	19.1	14.6	66.3	33.7	49	-0.038	-0.132	0.038	0.132	Hediste_japonica_NC_050679_1	0.0885763	5	2.708	Hediste_japonica_NC_050679	Hediste_japonica_NC_050679	single
4	NC_035507.1	Hediste diadroma	Hediste_diadroma_NC_035507_1	Polychaeta	Phyllodocida	Nereididae	Hediste	Annelida	F	I	15765	14392	-0.117	0.0870282	32.4	35.2	18.2	14.2	67.6	32.4	49.4	-0.041	-0.125	0.041	0.125	Hediste_diadroma_NC_035507_1	0.0870917	5	2.707	Hediste_diadroma_NC_035507	Hediste_diadroma_NC_035507	single
5	NC_012768.1	Urechis unicinctus	Urechis_unicinctus_NC_012768_1	Polychaeta	Xenopneusta	Urechidae	Urechis	Annelida	F	L	15761	14763	-0.218	0.0629402	31	30.8	23.2	14.9	61.8	38.1	45.7	0.003	-0.219	-0.003	0.219	Urechis_unicinctus_NC_012768_1	0.0633209	5	2.78	Urechis_unicinctus_NC_012768	Urechis_unicinctus_NC_012768	single
4	NC_053360.1	Nereis zonata	Nereis_zonata_NC_053360_1	Polychaeta	Phyllodocida	Nereididae	Nereis	Annelida	F	I	15757	14373	-0.168	0.0877071	31.5	31.3	21.7	15.6	62.8	37.3	46.9	0.004	-0.164	-0.004	0.164	Nereis_zonata_NC_053360_1	0.087834	5	2.744	Nereis_zonata_NC_053360	Nereis_zonata_NC_053360	single
4	NC_011014.1	Terebellides stroemii	Terebellides_stroemii_NC_011014_1	Polychaeta	Terebellida	Trichobranchidae	Terebellides	Annelida	F	L	15755	14851	-0.222	0.0573786	31.1	36.1	20.1	12.8	67.2	32.9	48.9	-0.075	-0.221	0.075	0.221	Terebellides_stroemii_NC_011014_1	0.0573786	5	2.709	Terebellides_stroemii_NC_011014	Terebellides_stroemii_NC_011014	single
5	NC_027699.1	Ramisyllis multicaudata	Ramisyllis_multicaudata_NC_027699_1	Polychaeta	Phyllodocida	Syllidae	Ramisyllis	Annelida	F	I	15748	14222	-0.291	0.0894082	33.8	32.8	21.8	11.6	66.6	33.4	44.4	0.016	-0.306	-0.016	0.306	Ramisyllis_multicaudata_NC_027699_1	0.0969012	5	3.591	Ramisyllis_multicaudata_NC_027699	Ramisyllis_multicaudata_NC_027699	single
4	NC_059817.1	Melinna cristata	Melinna_cristata_NC_059817_1	Polychaeta	Terebellida	Melinnidae	Melinna	Annelida	F	L	15696	14883	-0.232	0.0517329	29.9	36.4	20.8	12.9	66.3	33.7	49.3	-0.099	-0.236	0.099	0.236	Melinna_cristata_NC_059817_1	0.0517966	5	2.654	Melinna_cristata_NC_059817	Melinna_cristata_NC_059817	single
4	NC_060301.1	Thelepus plagiostoma	Thelepus_plagiostoma_NC_060301_1	Polychaeta	Terebellida	Terebellidae	Thelepus	Annelida	F	L	15628	14727	-0.271	0.057525	30.9	35.8	21.3	12	66.7	33.3	47.8	-0.073	-0.278	0.073	0.278	Thelepus_plagiostoma_NC_060301_1	0.0576529	5	2.87	Thelepus_plagiostoma_NC_060301	Thelepus_plagiostoma_NC_060301	single
4	NC_000931.1	Platynereis dumerilii	Platynereis_dumerilii_NC_000931_1	Polychaeta	Phyllodocida	Nereididae	Platynereis	Annelida	F	I	15619	14352	-0.141	0.0810551	31.2	32.9	20.4	15.4	64.1	35.8	48.3	-0.026	-0.141	0.026	0.141	Platynereis_dumerilii_NC_000931_1	0.0811192	5	2.762	Platynereis_dumerilii_NC_000931	Platynereis_dumerilii_NC_000931	single
6	NC_056279.1	Sabella spallanzanii	Sabella_spallanzanii_NC_056279_1	Polychaeta	Sabellida	Sabellidae	Sabella	Annelida	F	L	15581	14207	0.304	0.0823439	30.1	34.5	12.3	23.1	64.6	35.4	57.6	-0.067	0.307	0.067	-0.307	Sabella_spallanzanii_NC_056279_1	0.0881843	5	3.698	Sabella_spallanzanii_NC_056279	Sabella_spallanzanii_NC_056279	double
4	NC_007933.1	Orbinia latreillii	Orbinia_latreillii_NC_007933_1	Polychaeta		Orbiniidae	Orbinia	Annelida	F	I	15558	14691	-0.331	0.0527703	29.7	31.3	26.2	12.8	61	39	44.1	-0.026	-0.344	0.026	0.344	Orbinia_latreillii_NC_007933_1	0.055727	5	2.98	Orbinia_latreillii_NC_007933	Orbinia_latreillii_NC_007933	single
4	NC_032361.1	Paraleonnates uschakovi	Paraleonnates_uschakovi_NC_032361_1	Polychaeta	Phyllodocida	Nereididae	Paraleonnates	Annelida	F	I	15540	14402	-0.247	0.0732304	30.3	32.8	23.2	13.8	63.1	37	46.6	-0.04	-0.254	0.04	0.254	Paraleonnates_uschakovi_NC_032361_1	0.0732304	5	2.607	Paraleonnates_uschakovi_NC_032361	Paraleonnates_uschakovi_NC_032361	single
4	NC_006321.1	Clymenella torquata	Clymenella_torquata_NC_006321_1	Polychaeta		Maldanidae	Clymenella	Annelida	F	I	15538	14659	-0.184	0.0563136	33	34.3	19.5	13.3	67.3	32.8	47.6	-0.02	-0.188	0.02	0.188	Clymenella_torquata_NC_006321_1	0.056571	5	2.751	Clymenella_torquata_NC_006321	Clymenella_torquata_NC_006321	single
3	NC_011826.1	Sipunculus nudus	Sipunculus_nudus_NC_011826_1		Sipuncula	Sipunculidae	Sipunculus	Annelida	F	L	15502	14911	-0.298	0.0381241	26.8	27.4	29.7	16.1	54.2	45.8	43.5	-0.013	-0.297	0.013	0.297	Sipunculus_nudus_NC_011826_1	0.0381241	5	2.653	Sipunculus_nudus_NC_011826	Sipunculus_nudus_NC_011826	single
4	NC_044092.1	Timarete posteria	Timarete_posteria_NC_044092_1	Polychaeta	Terebellida	Cirratulidae	Timarete	Annelida	F	L	15497	14673	-0.318	0.0485901	30.4	31.6	25.2	12.8	62	38	44.4	-0.019	-0.326	0.019	0.326	Timarete_posteria_NC_044092_1	0.150545	5	3.624	Timarete_posteria_NC_044092	Timarete_posteria_NC_044092	single
4	NC_037390.1	Cirriformia cf. tentaculata HK-2018	Cirriformia_cf__tentaculata_HK_2018_NC_037390_1	Polychaeta	Terebellida	Cirratulidae	Cirriformia	Annelida	F	L	15495	14757	-0.322	0.0474347	29.5	30	26.9	13.6	59.5	40.5	43.6	-0.01	-0.328	0.01	0.328	Cirriformia_cf__tentaculata_HK_2018_NC_037390_1	0.0476283	5	3.623	Cirriformia_cf__tentaculata_HK_2018_NC_037390	Cirriformia_cf__tentaculata_HK_2018_NC_037390	single
3	NC_012618.1	Phascolosoma esculenta	Phascolosoma_esculenta_NC_012618_1		Sipuncula	Phascolosomatidae	Phascolosoma	Annelida	F	L	15494	14648	-0.243	0.0546018	32.1	33.4	21.5	13	65.5	34.5	46.4	-0.019	-0.248	0.019	0.248	Phascolosoma_esculenta_NC_012618_1	0.0546018	5	2.956	Phascolosoma_esculenta_NC_012618	Phascolosoma_esculenta_NC_012618	single
4	NC_026856.1	Escarpia spicata	Escarpia_spicata_NC_026856_1	Polychaeta	Sabellida	Siboglinidae	Escarpia	Annelida	F	L	15445	14636	-0.274	0.0507608	30.6	35.5	21.4	12.5	66.1	33.9	48	-0.074	-0.264	0.074	0.264	Escarpia_spicata_NC_026856_1	0.0523794	5	2.832	Escarpia_spicata_NC_026856	Escarpia_spicata_NC_026856	single
6	NC_052721.1	Pharyngocirrus uchidai	Pharyngocirrus_uchidai_NC_052721_1	Polychaeta		Saccocirridae	Pharyngocirrus	Annelida	F	I	15415	14489	0.213	0.0561142	32.4	24.3	17.2	26.1	56.7	43.3	50.4	0.144	0.206	-0.144	-0.206	Pharyngocirrus_uchidai_NC_052721_1	0.074927	5	2.639	Pharyngocirrus_uchidai_NC_052721	Pharyngocirrus_uchidai_NC_052721	single
4	NC_051993.1	Alitta succinea	Alitta_succinea_NC_051993_1	Polychaeta	Phyllodocida	Nereididae	Alitta	Annelida	F	I	15409	14399	-0.214	0.0654812	32.6	30.9	22.2	14.3	63.5	36.5	45.2	0.026	-0.214	-0.026	0.214	Alitta_succinea_NC_051993_1	0.0655461	5	2.769	Alitta_succinea_NC_051993	Alitta_succinea_NC_051993	single
4	NC_026855.1	Sclerolinum brattstromi	Sclerolinum_brattstromi_NC_026855_1	Polychaeta	Sabellida	Siboglinidae	Sclerolinum	Annelida	F	L	15383	14631	-0.287	0.0462849	30.7	34.2	22.8	12.3	64.9	35.1	46.5	-0.054	-0.297	0.054	0.297	Sclerolinum_brattstromi_NC_026855_1	0.0488851	5	2.836	Sclerolinum_brattstromi_NC_026855	Sclerolinum_brattstromi_NC_026855	single
4	NC_060302.1	Eunoe nodosa	Eunoe_nodosa_NC_060302_1	Polychaeta	Phyllodocida	Polynoidae	Eunoe	Annelida	F	I	15366	14645	-0.178	0.00260315	28.9	38.8	19	13.2	67.7	32.2	52	-0.147	-0.18	0.147	0.18	Eunoe_nodosa_NC_060302_1	0.0469218	5	2.648	Eunoe_nodosa_NC_060302	Eunoe_nodosa_NC_060302	single
4	NC_026995.1	Goniada japonica	Goniada_japonica_NC_026995_1	Polychaeta	Phyllodocida	Goniadidae	Goniada	Annelida	F	I	15327	14640	-0.251	0.0448229	35.1	33.7	19.6	11.7	68.8	31.3	45.4	0.02	-0.253	-0.02	0.253	Goniada_japonica_NC_026995_1	0.0448229	5	2.578	Goniada_japonica_NC_026995	Goniada_japonica_NC_026995	single
4	NC_060815.1	Craseoschema thyasiricola	Craseoschema_thyasiricola_NC_060815_1	Polychaeta	Phyllodocida	Chrysopetalidae	Craseoschema	Annelida	F	I	15301	14162	-0.184	0.0669891	33.6	35.9	18.2	12.3	69.5	30.5	48.2	-0.033	-0.193	0.033	0.193	Craseoschema_thyasiricola_NC_060815_1	0.0744396	5	4.587	Craseoschema_thyasiricola_NC_060815	Craseoschema_thyasiricola_NC_060815	single
4	NC_046790.1	Aphrodita australis	Aphrodita_australis_NC_046790_1	Polychaeta	Phyllodocida	Aphroditidae	Aphrodita	Annelida	F	I	15288	14604	-0.289	0.044741	31	33.7	22.8	12.5	64.7	35.3	46.2	-0.042	-0.291	0.042	0.291	Aphrodita_australis_NC_046790_1	0.000784929	5	2.673	Aphrodita_australis_NC_046790	Aphrodita_australis_NC_046790	single
4	NC_037085.1	Paraescarpia echinospica	Paraescarpia_echinospica_NC_037085_1	Polychaeta	Sabellida	Siboglinidae	Paraescarpia	Annelida	F	L	15280	14637	-0.281	0.0350131	30.1	34.2	22.8	12.9	64.3	35.7	47.1	-0.064	-0.276	0.064	0.276	Paraescarpia_echinospica_NC_037085_1	0.0420812	5	2.814	Paraescarpia_echinospica_NC_037085	Paraescarpia_echinospica_NC_037085	single
4	NC_030040.1	Namalycastis abiuma	Namalycastis_abiuma_NC_030040_1	Polychaeta	Phyllodocida	Nereididae	Namalycastis	Annelida	F	I	15265	13835	-0.268	0.0935473	30.8	30.6	24.6	14	61.4	38.6	44.6	0.003	-0.275	-0.003	0.275	Namalycastis_abiuma_NC_030040_1	0.0936783	5	2.704	Namalycastis_abiuma_NC_030040	Namalycastis_abiuma_NC_030040	single
5	NC_028711.1	Magelona mirabilis	Magelona_mirabilis_NC_028711_1	Polychaeta	Spionida	Magelonidae	Magelona	Annelida	F	L	15239	14450	-0.101	0.0517751	28.8	34.7	20.2	16.3	63.5	36.5	51	-0.093	-0.107	0.093	0.107	Magelona_mirabilis_NC_028711_1	0.0517751	5	2.34	Magelona_mirabilis_NC_028711	Magelona_mirabilis_NC_028711	double
4	NC_030269.1	Placobdella lamothei	Placobdella_lamothei_NC_030269_1	Clitellata	Rhynchobdellida	Glossiphoniidae	Placobdella	Annelida	F	I	15190	14418	-0.125	0.0508229	31.7	36.4	18	13.9	68.1	31.9	50.3	-0.069	-0.128	0.069	0.128	Placobdella_lamothei_NC_030269_1	0.0508229	5	2.985	Placobdella_lamothei_NC_030269	Placobdella_lamothei_NC_030269	single
4	NC_029870.1	Amynthas pectiniferus	Amynthas_pectiniferus_NC_029870_1	Clitellata	Crassiclitellata	Megascolecidae	Amynthas	Annelida	F	I	15188	14536	-0.19	0.0429286	35	31.2	20	13.8	66.2	33.8	45	0.057	-0.185	-0.057	0.185	Amynthas_pectiniferus_NC_029870_1	0.0429286	5	2.758	Amynthas_pectiniferus_NC_029870	Amynthas_pectiniferus_NC_029870	single
4	NC_027831.1	Amynthas longisiphonus	Amynthas_longisiphonus_NC_027831_1	Clitellata	Crassiclitellata	Megascolecidae	Amynthas	Annelida	F	I	15176	14595	-0.162	0.0382841	34.4	31.9	19.5	14.3	66.3	33.8	46.2	0.038	-0.155	-0.038	0.155	Amynthas_longisiphonus_NC_027831_1	0.0382841	5	2.845	Amynthas_longisiphonus_NC_027831	Amynthas_longisiphonus_NC_027831	single
4	NC_029869.1	Metaphire guillelmi	Metaphire_guillelmi_NC_029869_1	Clitellata	Crassiclitellata	Megascolecidae	Metaphire	Annelida	F	I	15174	14550	-0.159	0.041123	33.7	31.6	20.1	14.6	65.3	34.7	46.2	0.032	-0.156	-0.032	0.156	Metaphire_guillelmi_NC_029869_1	0.041123	5	2.769	Metaphire_guillelmi_NC_029869	Metaphire_guillelmi_NC_029869	single
4	NC_060488.1	Tonoscolex birmanicus	Tonoscolex_birmanicus_NC_060488_1	Clitellata	Crassiclitellata	Megascolecidae	Tonoscolex	Annelida	F	I	15170	14560	-0.2	0.0402109	33.5	29.9	21.9	14.7	63.4	36.6	44.6	0.057	-0.196	-0.057	0.196	Tonoscolex_birmanicus_NC_060488_1	0.0402109	5	2.693	Tonoscolex_birmanicus_NC_060488	Tonoscolex_birmanicus_NC_060488	single
4	NC_037236.1	Marphysa tamurai	Marphysa_tamurai_NC_037236_1	Polychaeta	Eunicida	Eunicidae	Marphysa	Annelida	F	I	15163	14490	-0.353	0.0438568	30.2	30.4	26.8	12.6	60.6	39.4	43	-0.003	-0.36	0.003	0.36	Marphysa_tamurai_NC_037236_1	0.0443844	5	2.732	Marphysa_tamurai_NC_037236	Marphysa_tamurai_NC_037236	single
4	NC_027258.1	Amynthas gracilis	Amynthas_gracilis_NC_027258_1	Clitellata	Crassiclitellata	Megascolecidae	Amynthas	Annelida	F	I	15161	14557	-0.186	0.0398391	34.5	31.4	20.2	14	65.9	34.2	45.4	0.046	-0.181	-0.046	0.181	Amynthas_gracilis_NC_027258_1	0.0398391	5	2.73	Amynthas_gracilis_NC_027258	Amynthas_gracilis_NC_027258	single
4	NC_029868.1	Amynthas triastriatus	Amynthas_triastriatus_NC_029868_1	Clitellata	Crassiclitellata	Megascolecidae	Amynthas	Annelida	F	I	15160	14557	-0.179	0.0397757	34	31.3	20.4	14.3	65.3	34.7	45.6	0.04	-0.175	-0.04	0.175	Amynthas_triastriatus_NC_029868_1	0.0397757	5	2.774	Amynthas_triastriatus_NC_029868	Amynthas_triastriatus_NC_029868	single
4	NC_029863.1	Amynthas carnosus	Amynthas_carnosus_NC_029863_1	Clitellata	Crassiclitellata	Megascolecidae	Amynthas	Annelida	F	I	15160	14529	-0.162	0.0416227	32.7	29.9	21.6	15.8	62.6	37.4	45.7	0.045	-0.157	-0.045	0.157	Amynthas_carnosus_NC_029863_1	0.00197889	5	2.797	Amynthas_carnosus_NC_029863	Amynthas_carnosus_NC_029863	single
4	NC_023124.1	Marphysa sanguinea	Marphysa_sanguinea_NC_023124_1	Polychaeta	Eunicida	Eunicidae	Marphysa	Annelida	F	I	15159	14494	-0.35	0.0431427	30.7	30.3	26.5	12.6	61	39.1	42.9	0.007	-0.357	-0.007	0.357	Marphysa_sanguinea_NC_023124_1	0.0438683	5	2.724	Marphysa_sanguinea_NC_023124	Marphysa_sanguinea_NC_023124	single
4	NC_029867.1	Duplodicodrilus schmardae	Duplodicodrilus_schmardae_NC_029867_1	Clitellata	Crassiclitellata	Megascolecidae	Duplodicodrilus	Annelida	F	I	15156	14542	-0.151	0.040512	34.2	32.5	19.1	14.2	66.7	33.3	46.7	0.025	-0.147	-0.025	0.147	Duplodicodrilus_schmardae_NC_029867_1	0.040512	5	2.766	Duplodicodrilus_schmardae_NC_029867	Duplodicodrilus_schmardae_NC_029867	single
4	NC_029879.1	Amynthas jiriensis	Amynthas_jiriensis_NC_029879_1	Clitellata	Crassiclitellata	Megascolecidae	Amynthas	Annelida	F	I	15151	14523	-0.163	0.0414494	34.1	32.4	19.4	14.1	66.5	33.5	46.5	0.027	-0.157	-0.027	0.157	Amynthas_jiriensis_NC_029879_1	0.0414494	5	2.768	Amynthas_jiriensis_NC_029879	Amynthas_jiriensis_NC_029879	single
4	NC_027257.1	Metaphire californica	Metaphire_californica_NC_027257_1	Clitellata	Crassiclitellata	Megascolecidae	Metaphire	Annelida	F	I	15147	14558	-0.19	0.0388856	33.7	30.4	21.3	14.6	64.1	35.9	45	0.052	-0.185	-0.052	0.185	Metaphire_californica_NC_027257_1	0.0388856	5	2.742	Metaphire_californica_NC_027257	Metaphire_californica_NC_027257	single
4	NC_029872.1	Amynthas moniliatus	Amynthas_moniliatus_NC_029872_1	Clitellata	Crassiclitellata	Megascolecidae	Amynthas	Annelida	F	I	15133	14554	-0.185	0.0382608	35.5	31.3	19.6	13.7	66.8	33.3	45	0.063	-0.178	-0.063	0.178	Amynthas_moniliatus_NC_029872_1	0.0382608	5	2.764	Amynthas_moniliatus_NC_029872	Amynthas_moniliatus_NC_029872	single
4	NC_027832.1	Amynthas corticis	Amynthas_corticis_NC_027832_1	Clitellata	Crassiclitellata	Megascolecidae	Amynthas	Annelida	F	I	15126	14514	-0.173	0.0404601	34.7	31.5	19.7	14	66.2	33.7	45.5	0.048	-0.169	-0.048	0.169	Amynthas_corticis_NC_027832_1	0.0404601	5	2.759	Amynthas_corticis_NC_027832	Amynthas_corticis_NC_027832	single
4	NC_029866.1	Amynthas cucullatus	Amynthas_cucullatus_NC_029866_1	Clitellata	Crassiclitellata	Megascolecidae	Amynthas	Annelida	F	I	15122	14540	-0.163	0.038487	33.9	30.9	20.4	14.8	64.8	35.2	45.7	0.046	-0.16	-0.046	0.16	Amynthas_cucullatus_NC_029866_1	0.038487	5	2.779	Amynthas_cucullatus_NC_029866	Amynthas_cucullatus_NC_029866	single
4	NC_025292.1	Amynthas aspergillus	Amynthas_aspergillus_NC_025292_1	Clitellata	Crassiclitellata	Megascolecidae	Amynthas	Annelida	F	I	15115	14532	-0.219	0.038571	33.4	29.6	22.4	14.6	63	37	44.2	0.06	-0.212	-0.06	0.212	Amynthas_aspergillus_NC_025292_1	0.038571	5	2.748	Amynthas_aspergillus_NC_025292	Amynthas_aspergillus_NC_025292	single
5	NC_006379.1	Urechis caupo	Urechis_caupo_NC_006379_1	Polychaeta	Xenopneusta	Urechidae	Urechis	Annelida	F	L	15113	14750	-0.234	0.023622	31.5	30.5	23.5	14.4	62	37.9	44.9	0.016	-0.24	-0.016	0.24	Urechis_caupo_NC_006379_1	0.0240191	5	2.776	Urechis_caupo_NC_006379	Urechis_caupo_NC_006379	single
4	NC_050262.1	Manayunkia occidentalis	Manayunkia_occidentalis_NC_050262_1	Polychaeta	Sabellida	Fabriciidae	Manayunkia	Annelida	F	L	15103	14475	-0.18	0.0329736	30.8	40.9	16.6	11.7	71.7	28.3	52.6	-0.141	-0.175	0.141	0.175	Manayunkia_occidentalis_NC_050262_1	0.0415811	5	3.029	Manayunkia_occidentalis_NC_050262	Manayunkia_occidentalis_NC_050262	single
4	NC_026861.1	Seepiophila jonesi	Seepiophila_jonesi_NC_026861_1	Polychaeta	Sabellida	Siboglinidae	Seepiophila	Annelida	F	L	15092	14640	-0.281	0.0250464	30.5	34.4	22.6	12.6	64.9	35.2	47	-0.061	-0.286	0.061	0.286	Seepiophila_jonesi_NC_026861_1	0.0299496	5	2.818	Seepiophila_jonesi_NC_026861	Seepiophila_jonesi_NC_026861	single
4	NC_046733.1	Aporrectodea rosea	Aporrectodea_rosea_NC_046733_1	Clitellata	Crassiclitellata	Lumbricidae	Aporrectodea	Annelida	F	I	15086	14560	-0.236	0.0348668	32.3	31.4	22.3	14	63.7	36.3	45.4	0.014	-0.23	-0.014	0.23	Aporrectodea_rosea_NC_046733_1	0.0348668	5	2.7	Aporrectodea_rosea_NC_046733	Aporrectodea_rosea_NC_046733	single
4	NC_009631.1	Perionyx excavatus	Perionyx_excavatus_NC_009631_1	Clitellata	Crassiclitellata	Megascolecidae	Perionyx	Annelida	F	I	15083	14499	-0.212	0.0387191	33.7	30.8	21.3	14.1	64.5	35.4	44.9	0.045	-0.204	-0.045	0.204	Perionyx_excavatus_NC_009631_1	0.0387191	5	2.762	Perionyx_excavatus_NC_009631	Perionyx_excavatus_NC_009631	single
4	NC_029864.1	Amynthas hupeiensis	Amynthas_hupeiensis_NC_029864_1	Clitellata	Crassiclitellata	Megascolecidae	Amynthas	Annelida	F	I	15069	14549	-0.192	0.0345079	35.3	30.6	20.3	13.8	65.9	34.1	44.4	0.071	-0.19	-0.071	0.19	Amynthas_hupeiensis_NC_029864_1	0.0345079	5	2.771	Amynthas_hupeiensis_NC_029864	Amynthas_hupeiensis_NC_029864	single
4	NC_023836.1	Metaphire vulgaris	Metaphire_vulgaris_NC_023836_1	Clitellata	Crassiclitellata	Megascolecidae	Metaphire	Annelida	F	I	15061	14551	-0.16	0.0338623	33.5	31.1	20.4	14.9	64.6	35.3	46	0.037	-0.155	-0.037	0.155	Metaphire_vulgaris_NC_023836_1	0.0338623	5	2.765	Metaphire_vulgaris_NC_023836	Metaphire_vulgaris_NC_023836	single
4	NC_058588.1	Diopatra cuprea	Diopatra_cuprea_NC_058588_1	Polychaeta	Eunicida	Onuphidae	Diopatra	Annelida	F	I	15050	14414	-0.346	0.0404651	29.8	37.9	21.8	10.4	67.7	32.2	48.3	-0.119	-0.354	0.119	0.354	Diopatra_cuprea_NC_058588_1	0.0422591	5	2.701	Diopatra_cuprea_NC_058588	Diopatra_cuprea_NC_058588	single
4	NC_027854.1	Lamellibrachia satsuma	Lamellibrachia_satsuma_NC_027854_1	Polychaeta	Sabellida	Siboglinidae	Lamellibrachia	Annelida	F	L	15037	14643	-0.293	0.0214138	30.9	34.7	22.3	12.1	65.6	34.4	46.8	-0.058	-0.297	0.058	0.297	Lamellibrachia_satsuma_NC_027854_1	0.026202	5	2.84	Lamellibrachia_satsuma_NC_027854	Lamellibrachia_satsuma_NC_027854	single
4	NC_031403.1	Myrianida brachycephala	Myrianida_brachycephala_NC_031403_1	Polychaeta	Phyllodocida	Syllidae	Myrianida	Annelida	F	I	15032	14169	-0.212	0.0542177	31.3	38.2	18.4	12.1	69.5	30.5	50.3	-0.099	-0.207	0.099	0.207	Myrianida_brachycephala_NC_031403_1	0.0574109	5	2.98	Myrianida_brachycephala_NC_031403	Myrianida_brachycephala_NC_031403	single
4	NC_029865.1	Amynthas morrisi	Amynthas_morrisi_NC_029865_1	Clitellata	Crassiclitellata	Megascolecidae	Amynthas	Annelida	F	I	15026	14566	-0.173	0.0306136	33.9	31.5	20.2	14.4	65.4	34.6	45.9	0.036	-0.167	-0.036	0.167	Amynthas_morrisi_NC_029865_1	0.0306136	5	2.708	Amynthas_morrisi_NC_029865	Amynthas_morrisi_NC_029865	single
4	NC_029871.1	Amynthas robustus	Amynthas_robustus_NC_029871_1	Clitellata	Crassiclitellata	Megascolecidae	Amynthas	Annelida	F	I	15013	14471	-0.17	0.036102	33.7	31.2	20.5	14.6	64.9	35.1	45.8	0.038	-0.167	-0.038	0.167	Amynthas_robustus_NC_029871_1	0.036102	5	2.759	Amynthas_robustus_NC_029871	Amynthas_robustus_NC_029871	single
5	NC_037947.1	Cryptonome barbada	Cryptonome_barbada_NC_037947_1	Polychaeta	Eunicida	Amphinomidae	Cryptonome	Annelida	F	I	15013	14565	-0.322	0.0190502	29.2	27.6	28.6	14.6	56.8	43.2	42.2	0.028	-0.323	-0.028	0.323	Cryptonome_barbada_NC_037947_1	0.0298408	5	2.734	Cryptonome_barbada_NC_037947	Cryptonome_barbada_NC_037947	single
4	NC_024653.1	Ridgeia piscesae	Ridgeia_piscesae_NC_024653_1	Polychaeta	Sabellida	Siboglinidae	Ridgeia	Annelida	F	L	15002	14633	-0.3	0.0245967	30.2	33	24	12.8	63.2	36.8	45.8	-0.044	-0.305	0.044	0.305	Ridgeia_piscesae_NC_024653_1	0.0245967	5	2.845	Ridgeia_piscesae_NC_024653	Ridgeia_piscesae_NC_024653	single
4	NC_001673.1	Lumbricus terrestris	Lumbricus_terrestris_NC_001673_1	Clitellata	Crassiclitellata	Lumbricidae	Lumbricus	Annelida	F	I	14998	14535	-0.182	0.0308708	29.8	31.8	22.5	15.8	61.6	38.3	47.6	-0.031	-0.176	0.031	0.176	Lumbricus_terrestris_NC_001673_1	0.0308708	5	2.71	Lumbricus_terrestris_NC_001673	Lumbricus_terrestris_NC_001673	single
4	NC_026858.1	Lamellibrachia luymesi	Lamellibrachia_luymesi_NC_026858_1	Polychaeta	Sabellida	Siboglinidae	Lamellibrachia	Annelida	F	L	14991	14641	-0.3	0.0210126	30.5	34	23.1	12.4	64.5	35.5	46.4	-0.055	-0.302	0.055	0.302	Lamellibrachia_luymesi_NC_026858_1	0.0233473	5	2.84	Lamellibrachia_luymesi_NC_026858	Lamellibrachia_luymesi_NC_026858	single
4	NC_026860.1	Riftia pachyptila	Riftia_pachyptila_NC_026860_1	Polychaeta	Sabellida	Siboglinidae	Riftia	Annelida	F	L	14987	14645	-0.258	0.0199506	31.5	35.3	21	12.3	66.8	33.3	47.6	-0.057	-0.262	0.057	0.262	Riftia_pachyptila_NC_026860_1	0.0228198	5	2.834	Riftia_pachyptila_NC_026860	Riftia_pachyptila_NC_026860	single
4	NC_026862.1	Tevnia jerichonana	Tevnia_jerichonana_NC_026862_1	Polychaeta	Sabellida	Siboglinidae	Tevnia	Annelida	F	L	14891	14628	-0.295	0.0118192	30.5	34.1	23	12.5	64.6	35.5	46.6	-0.056	-0.297	0.056	0.297	Tevnia_jerichonana_NC_026862_1	0.0176617	5	2.847	Tevnia_jerichonana_NC_026862	Tevnia_jerichonana_NC_026862	single
4	NC_034807.1	Ozobranchus jantseanus	Ozobranchus_jantseanus_NC_034807_1	Clitellata	Hirudinida	Ozobranchidae	Ozobranchus	Annelida	MP	I	14864	14405	-0.081	0.0107643	35	37.4	14.9	12.6	72.4	27.5	50	-0.033	-0.083	0.033	0.083	Ozobranchus_jantseanus_NC_034807_1	0.03088	5	3.233	Ozobranchus_jantseanus_NC_034807	Ozobranchus_jantseanus_NC_034807	single
4	NC_026859.1	Oasisia alvinae	Oasisia_alvinae_NC_026859_1	Polychaeta	Sabellida	Siboglinidae	Oasisia	Annelida	F	L	14849	14597	-0.274	0.0147485	30.5	34.4	22.4	12.7	64.9	35.1	47.1	-0.06	-0.279	0.06	0.279	Oasisia_alvinae_NC_026859_1	0.0169708	5	2.848	Oasisia_alvinae_NC_026859	Oasisia_alvinae_NC_026859	single
4	NC_034783.1	Pontoscolex corethrurus	Pontoscolex_corethrurus_NC_034783_1	Clitellata	Crassiclitellata	Glossoscolecidae	Pontoscolex	Annelida	F	I	14835	14495	-0.259	0.0229188	31.9	27.9	25.3	14.9	59.8	40.2	42.8	0.066	-0.258	-0.066	0.258	Pontoscolex_corethrurus_NC_034783_1	0.0229188	5	2.69	Pontoscolex_corethrurus_NC_034783	Pontoscolex_corethrurus_NC_034783	single
4	NC_026857.1	Galathealinum brachiosum	Galathealinum_brachiosum_NC_026857_1	Polychaeta	Sabellida	Siboglinidae	Galathealinum	Annelida	F	L	14779	14524	-0.17	0.0136004	33.4	44.5	12.9	9.2	77.9	22.1	53.7	-0.142	-0.167	0.142	0.167	Galathealinum_brachiosum_NC_026857_1	0.0172542	5	3.153	Galathealinum_brachiosum_NC_026857	Galathealinum_brachiosum_NC_026857	single
4	NC_036150.1	Erpobdella japonica	Erpobdella_japonica_NC_036150_1	Clitellata	Hirudinida	Erpobdellidae	Erpobdella	Annelida	F	I	14725	14311	-0.064	0.027708	35.2	37	14.9	13	72.2	27.9	50	-0.025	-0.066	0.025	0.066	Erpobdella_japonica_NC_036150_1	0.0281155	5	3.197	Erpobdella_japonica_NC_036150	Erpobdella_japonica_NC_036150	single
4	NC_058234.1	Haemadipsa crenata	Haemadipsa_crenata_NC_058234_1	Clitellata	Hirudinida	Haemadipsidae	Haemadipsa	Annelida	MP	I	14725	14201	0.058	0.0218676	34.4	42.4	10.9	12.3	76.8	23.2	54.7	-0.104	0.06	0.104	-0.06	Haemadipsa_crenata_NC_058234_1	0.0355857	5	3.645	Haemadipsa_crenata_NC_058234	Haemadipsa_crenata_NC_058234	single
4	NC_031402.1	Eusyllis blomstrandi	Eusyllis_blomstrandi_NC_031402_1	Polychaeta	Phyllodocida	Syllidae	Eusyllis	Annelida	F	I	14712	14178	-0.065	0.0207993	32.3	38.7	15.3	13.6	71	28.9	52.3	-0.09	-0.06	0.09	0.06	Eusyllis_blomstrandi_NC_031402_1	0.0362969	5	2.792	Eusyllis_blomstrandi_NC_031402	Eusyllis_blomstrandi_NC_031402	single
4	NC_028050.1	Drawida japonica	Drawida_japonica_NC_028050_1	Clitellata	Moniligastrida	Moniligastridae	Drawida	Annelida	F	I	14648	14588	0.042	0.00395958	29.5	40.2	14.5	15.8	69.7	30.3	56	-0.154	0.042	0.154	-0.042	Drawida_japonica_NC_028050_1	0.00409612	5	2.816	Drawida_japonica_NC_028050	Drawida_japonica_NC_028050	single
4	NC_058285.1	Drawida gisti	Drawida_gisti_NC_058285_1	Clitellata	Moniligastrida	Moniligastridae	Drawida	Annelida	F	I	14648	14584	0.035	0.00389132	29.9	39.9	14.6	15.6	69.8	30.2	55.5	-0.145	0.035	0.145	-0.035	Drawida_gisti_NC_058285_1	0.0043692	5	2.814	Drawida_gisti_NC_058285	Drawida_gisti_NC_058285	single
4	NC_023925.1	Poecilobdella manillensis	Poecilobdella_manillensis_NC_023925_1	Clitellata	Hirudinida	Hirudinidae	Poecilobdella	Annelida	MP	I	14470	14259	0.124	0.0141672	31.3	40.6	12.2	15.7	71.9	27.9	56.3	-0.129	0.126	0.129	-0.126	Poecilobdella_manillensis_NC_023925_1	0.0145819	5	3.737	Poecilobdella_manillensis_NC_023925	Poecilobdella_manillensis_NC_023925	single
4	NC_023928.1	Whitmania acranulata	Whitmania_acranulata_NC_023928_1	Clitellata	Hirudinida	Haemopidae	Whitmania	Annelida	F	I	14462	14212	0.15	0.0168718	30.8	40.8	12.1	16.3	71.6	28.4	57.1	-0.14	0.148	0.14	-0.148	Whitmania_acranulata_NC_023928_1	0.0172867	5	3.771	Whitmania_acranulata_NC_023928	Whitmania_acranulata_NC_023928	single
4	NC_023926.1	Whitmania laevis	Whitmania_laevis_NC_023926_1	Clitellata	Hirudinida	Haemopidae	Whitmania	Annelida	F	I	14433	14232	0.14	0.0134414	30.8	41.1	12	16	71.9	28	57.1	-0.144	0.142	0.144	-0.142	Whitmania_laevis_NC_023926_1	0.0139264	5	3.789	Whitmania_laevis_NC_023926	Whitmania_laevis_NC_023926	single
4	NC_013569.1	Whitmania pigra	Whitmania_pigra_NC_013569_1	Clitellata	Hirudinida	Haemopidae	Whitmania	Annelida	F	I	14426	14187	0.155	0.0161514	30.8	41.3	11.8	16.1	72.1	27.9	57.4	-0.145	0.155	0.145	-0.155	Whitmania_pigra_NC_013569_1	0.0165673	5	3.62	Whitmania_pigra_NC_013569	Whitmania_pigra_NC_013569	single
4	NC_023776.1	Hirudo nipponia	Hirudo_nipponia_NC_023776_1	Clitellata	Hirudinida	Hirudinidae	Hirudo	Annelida	MP	I	14414	14221	0.129	0.0129735	31.7	40.9	11.9	15.5	72.6	27.4	56.4	-0.127	0.128	0.127	-0.128	Hirudo_nipponia_NC_023776_1	0.0133898	5	3.747	Hirudo_nipponia_NC_023776	Hirudo_nipponia_NC_023776	single
4	NC_023927.1	Erpobdella octoculata	Erpobdella_octoculata_NC_023927_1	Clitellata	Hirudinida	Erpobdellidae	Erpobdella	Annelida	F	I	14407	14242	0.116	0.0110363	30.9	40.6	12.5	15.9	71.5	28.4	56.5	-0.135	0.117	0.135	-0.117	Erpobdella_octoculata_NC_023927_1	0.0114528	5	3.797	Erpobdella_octoculata_NC_023927	Erpobdella_octoculata_NC_023927	single
4	NC_051962.1	Cancer pagurus	Cancer_pagurus_NC_051962_1	Malacostraca	Decapoda	Cancridae	Cancer	Arthropoda	F	H	42736	15220	-0.301	0.522627	36.3	37.8	20.1	5.8	74.1	25.9	43.6	-0.019	-0.549	0.019	0.549	Cancer_pagurus_NC_051962_1	0.64386	5	2.74	Cancer_pagurus_NC_051962	Cancer_pagurus_NC_051962	double
8	NC_058990.1	Macrohectopus branickii	Macrohectopus_branickii_NC_058990_1	Malacostraca	Amphipoda	Macrohectopidae	Macrohectopus	Arthropoda	F	I	42256	13993	-0.139	0.628715	29.5	29.7	21.4	19.4	59.2	40.8	49.1	-0.003	-0.047	0.003	0.047	Macrohectopus_branickii_NC_058990_1	0.668852	5	3.534	Macrohectopus_branickii_NC_058990	Macrohectopus_branickii_NC_058990	double
4	NC_050675.1	Metacarcinus magister	Metacarcinus_magister_NC_050675_1	Malacostraca	Decapoda	Cancridae	Metacarcinus	Arthropoda	F	H	39658	15085	-0.267	0.595618	34.1	35.8	21.3	8.8	69.9	30.1	44.6	-0.025	-0.417	0.025	0.417	Metacarcinus_magister_NC_050675_1	0.619623	5	2.744	Metacarcinus_magister_NC_050675	Metacarcinus_magister_NC_050675	double
4	NC_029246.1	Hydropsyche pellucidula	Hydropsyche_pellucidula_NC_029246_1	Insecta	Trichoptera	Hydropsychidae	Hydropsyche	Arthropoda	F	H	25004	14760	-0.304	0.319629	42.7	40.9	11.3	5	83.6	16.3	45.9	0.022	-0.387	-0.022	0.387	Hydropsyche_pellucidula_NC_029246_1	0.409694	5	3.838	Hydropsyche_pellucidula_NC_029246	Hydropsyche_pellucidula_NC_029246	double
3	NC_048884.1	Rhynchium aff. brunneum YN	Rhynchium_aff__brunneum_YN_NC_048884_1	Insecta	Hymenoptera	Vespidae	Rhynchium	Arthropoda	F	H	23251	14873	-0.289	0.305578	36.7	46.3	9.3	7.7	83	17	54	-0.116	-0.098	0.116	0.098	Rhynchium_aff__brunneum_YN_NC_048884_1	0.360329	5	4.144	Rhynchium_aff__brunneum_YN_NC_048884	Rhynchium_aff__brunneum_YN_NC_048884	double
3	NC_048885.1	Rhynchium aff. brunneum GX	Rhynchium_aff__brunneum_GX_NC_048885_1	Insecta	Hymenoptera	Vespidae	Rhynchium	Arthropoda	F	H	23122	14873	-0.288	0.309575	36.8	46.2	9.4	7.6	83	17	53.8	-0.112	-0.103	0.112	0.103	Rhynchium_aff__brunneum_GX_NC_048885_1	0.35676	5	4.146	Rhynchium_aff__brunneum_GX_NC_048885	Rhynchium_aff__brunneum_GX_NC_048885	double
3	NC_060601.1	Lucanus cervus	Lucanus_cervus_NC_060601_1	Insecta	Coleoptera	Lucanidae	Lucanus	Arthropoda	F	H	22714	14497	-0.28	0.00145285	37.8	32.1	18.9	11.2	69.9	30.1	43.3	0.08	-0.254	-0.08	0.254	Lucanus_cervus_NC_060601_1	0.361759	5	2.637	Lucanus_cervus_NC_060601	Lucanus_cervus_NC_060601	double
3	NC_049878.1	Lysmata vittata	Lysmata_vittata_NC_049878_1	Malacostraca	Decapoda	Hippolytidae	Lysmata	Arthropoda	F	H	22003	14932	-0.207	0.321274	34.4	37.1	16.7	11.8	71.5	28.5	48.9	-0.039	-0.172	0.039	0.172	Lysmata_vittata_NC_049878_1	0.321365	5	2.772	Lysmata_vittata_NC_049878	Lysmata_vittata_NC_049878	double
3	NC_050891.1	Trigonopterus carinirostris	Trigonopterus_carinirostris_NC_050891_1	Insecta	Coleoptera	Curculionidae	Trigonopterus	Arthropoda	F	I	21007	14648	-0.358	0.302709	39.5	28.8	18.6	13.1	68.3	31.7	41.9	0.157	-0.176	-0.157	0.176	Trigonopterus_carinirostris_NC_050891_1	0.302709	5	3.167	Trigonopterus_carinirostris_NC_050891	Trigonopterus_carinirostris_NC_050891	double
3	NC_049858.1	Ctenocephalides felis	Ctenocephalides_felis_NC_049858_1	Insecta	Siphonaptera	Pulicidae	Ctenocephalides	Arthropoda	EctoP	H	20873	14559	-0.185	0.175586	39.7	43.4	10.4	6.5	83.1	16.9	49.9	-0.044	-0.23	0.044	0.23	Ctenocephalides_felis_NC_049858_1	0.302496	5	2.719	Ctenocephalides_felis_NC_049858	Ctenocephalides_felis_NC_049858	double
6	NC_025323.1	Metanephrops sibogae	Metanephrops_sibogae_NC_025323_1	Malacostraca	Decapoda	Nephropidae	Metanephrops	Arthropoda	F	H	20677	14819	-0.27	0.276539	35	32.9	20.4	11.7	67.9	32.1	44.6	0.032	-0.272	-0.032	0.272	Metanephrops_sibogae_NC_025323_1	0.28331	5	2.537	Metanephrops_sibogae_NC_025323	Metanephrops_sibogae_NC_025323	double
3	NC_018538.1	Challia fletcheri	Challia_fletcheri_NC_018538_1	Insecta	Dermaptera	Pygidicranidae	Challia	Arthropoda	F	H	20456	14859	0.311	0.184836	30.3	42.3	9	18.5	72.6	27.5	60.8	-0.166	0.346	0.166	-0.346	Challia_fletcheri_NC_018538_1	0.273612	5	2.781	Challia_fletcheri_NC_018538	Challia_fletcheri_NC_018538	double
3	NC_032071.1	Trachelus iudaicus	Trachelus_iudaicus_NC_032071_1	Insecta	Hymenoptera	Cephidae	Trachelus	Arthropoda	F	H	20370	15186	-0.31	0.0211586	42.4	36.5	13.6	7.4	78.9	21	43.9	0.075	-0.295	-0.075	0.295	Trachelus_iudaicus_NC_032071_1	0.254492	5	3.825	Trachelus_iudaicus_NC_032071	Trachelus_iudaicus_NC_032071	double
3	NC_023453.1	Protaetia brevitarsis	Protaetia_brevitarsis_NC_023453_1	Insecta	Coleoptera	Scarabaeidae	Protaetia	Arthropoda	F	H	20319	14629	-0.237	0.00177174	39.7	34.8	16.8	8.7	74.5	25.5	43.5	0.065	-0.319	-0.065	0.319	Protaetia_brevitarsis_NC_023453_1	0.280033	5	2.507	Protaetia_brevitarsis_NC_023453	Protaetia_brevitarsis_NC_023453	double
3	NC_054223.1	Aphidius gifuensis	Aphidius_gifuensis_NC_054223_1	Insecta	Hymenoptera	Braconidae	Aphidius	Arthropoda	Parasitoid	H	20134	14633	0.065	0.190623	40.5	46.1	6.4	7	86.6	13.4	53.1	-0.064	0.045	0.064	-0.045	Aphidius_gifuensis_NC_054223_1	0.273219	5	4.139	Aphidius_gifuensis_NC_054223	Aphidius_gifuensis_NC_054223	double
3	NC_045101.1	Ceutorhynchus obstrictus	Ceutorhynchus_obstrictus_NC_045101_1	Insecta	Coleoptera	Curculionidae	Ceutorhynchus	Arthropoda	F	H	20124	14645	-0.149	0.154691	40.3	36.6	12.3	10.7	76.9	23	47.3	0.048	-0.069	-0.048	0.069	Ceutorhynchus_obstrictus_NC_045101_1	0.272262	5	3.03	Ceutorhynchus_obstrictus_NC_045101	Ceutorhynchus_obstrictus_NC_045101	double
3	NC_028445.1	Calameuta filiformis	Calameuta_filiformis_NC_028445_1	Insecta	Hymenoptera	Cephidae	Calameuta	Arthropoda	F	H	20055	15144	-0.281	0.0220394	41.5	37.3	13.5	7.6	78.8	21.1	44.9	0.053	-0.281	-0.053	0.281	Calameuta_filiformis_NC_028445_1	0.244877	5	3.837	Calameuta_filiformis_NC_028445	Calameuta_filiformis_NC_028445	double
6	NC_027608.1	Metanephrops thomsoni	Metanephrops_thomsoni_NC_027608_1	Malacostraca	Decapoda	Nephropidae	Metanephrops	Arthropoda	F	H	19835	14962	-0.304	0.235594	34	32.6	22.2	11.2	66.6	33.4	43.8	0.022	-0.327	-0.022	0.327	Metanephrops_thomsoni_NC_027608_1	0.245677	5	2.509	Metanephrops_thomsoni_NC_027608	Metanephrops_thomsoni_NC_027608	double
3	NC_028446.1	Calameuta idolon	Calameuta_idolon_NC_028446_1	Insecta	Hymenoptera	Cephidae	Calameuta	Arthropoda	F	H	19746	15158	-0.274	0.0202066	41.5	37.7	12.9	7.3	79.2	20.2	45	0.047	-0.276	-0.047	0.276	Calameuta_idolon_NC_028446_1	0.232351	5	3.847	Calameuta_idolon_NC_028446	Calameuta_idolon_NC_028446	double
3	NC_048881.1	Allorhynchium sp. GX	Allorhynchium_sp__GX_NC_048881_1	Insecta	Hymenoptera	Vespidae	Allorhynchium	Arthropoda	F	H	19646	14736	-0.28	0.153314	37.4	43.5	10.8	8.2	80.9	19	51.7	-0.075	-0.136	0.075	0.136	Allorhynchium_sp__GX_NC_048881_1	0.249924	5	4.219	Allorhynchium_sp__GX_NC_048881	Allorhynchium_sp__GX_NC_048881	double
3	NC_058610.1	Picromerus lewisi	Picromerus_lewisi_NC_058610_1	Insecta	Hemiptera	Pentatomidae	Picromerus	Arthropoda	F	H	19587	14738	-0.181	0.0101087	41.5	33.9	14.2	10.5	75.4	24.7	44.4	0.101	-0.149	-0.101	0.149	Picromerus_lewisi_NC_058610_1	0.247562	5	3.121	Picromerus_lewisi_NC_058610	Picromerus_lewisi_NC_058610	double
3	NC_024511.2	Drosophila melanogaster	Drosophila_melanogaster_NC_024511_2	Insecta	Diptera	Drosophilidae	Drosophila	Arthropoda	F	H	19524	14722	-0.141	0.00993649	41.7	40.5	10.2	7.6	82.2	17.8	48.1	0.016	-0.147	-0.016	0.147	Drosophila_melanogaster_NC_024511_2	0.245954	5	2.396	Drosophila_melanogaster_NC_024511	Drosophila_melanogaster_NC_024511	double
3	NC_044757.1	Dytiscus sharpi	Dytiscus_sharpi_NC_044757_1	Insecta	Coleoptera	Dytiscidae	Dytiscus	Arthropoda	F	H	19476	14638	-0.133	0.0208975	43	38.3	10.9	7.8	81.3	18.7	46.1	0.057	-0.17	-0.057	0.17	Dytiscus_sharpi_NC_044757_1	0.248408	5	2.363	Dytiscus_sharpi_NC_044757	Dytiscus_sharpi_NC_044757	double
3	NC_049859.1	Aphaenogaster famelica	Aphaenogaster_famelica_NC_049859_1	Insecta	Hymenoptera	Formicidae	Aphaenogaster	Arthropoda	F	H	19464	14790	-0.345	0.232378	39.8	42.2	12.4	5.6	82	18	47.8	-0.03	-0.375	0.03	0.375	Aphaenogaster_famelica_NC_049859_1	0.240136	5	4.195	Aphaenogaster_famelica_NC_049859	Aphaenogaster_famelica_NC_049859	double
4	NC_060554.1	Esanthelphusa dugasti	Esanthelphusa_dugasti_NC_060554_1	Malacostraca	Decapoda	Gecarcinucidae	Esanthelphusa	Arthropoda	F	H	19437	14707	-0.32	0.240109	35.2	38	18	8.8	73.2	26.8	46.8	-0.038	-0.341	0.038	0.341	Esanthelphusa_dugasti_NC_060554_1	0.24335	5	2.77	Esanthelphusa_dugasti_NC_060554	Esanthelphusa_dugasti_NC_060554	double
3	NC_045874.1	Diamesus osculans	Diamesus_osculans_NC_045874_1	Insecta	Coleoptera	Silphidae	Diamesus	Arthropoda	F	H	19400	14633	-0.202	0.00587629	39.5	35.4	15.5	9.6	74.9	25.1	45	0.054	-0.233	-0.054	0.233	Diamesus_osculans_NC_045874_1	0.245722	5	2.478	Diamesus_osculans_NC_045874	Diamesus_osculans_NC_045874	double
3	NC_045283.1	Bombus waltoni	Bombus_waltoni_NC_045283_1	Insecta	Hymenoptera	Apidae	Bombus	Arthropoda	F	H	19349	14557	-0.284	0.0335418	41.2	41.6	10.2	6.8	82.8	17	48.4	-0.005	-0.197	0.005	0.197	Bombus_waltoni_NC_045283_1	0.247661	5	4.727	Bombus_waltoni_NC_045283	Bombus_waltoni_NC_045283	double
3	NC_012688.1	Cephus cinctus	Cephus_cinctus_NC_012688_1	Insecta	Hymenoptera	Cephidae	Cephus	Arthropoda	F	H	19339	15155	-0.262	0.0160815	42.4	39.6	11.6	6.4	82	18	46	0.034	-0.286	-0.034	0.286	Cephus_cinctus_NC_012688_1	0.21635	5	3.748	Cephus_cinctus_NC_012688	Cephus_cinctus_NC_012688	double
3	NC_053821.1	Aparapotamon similium	Aparapotamon_similium_NC_053821_1	Malacostraca	Decapoda	Potamidae	Aparapotamon	Arthropoda	F	H	19236	14712	-0.317	0.23508	35.2	37.7	18.5	8.7	72.9	27.2	46.4	-0.035	-0.363	0.035	0.363	Aparapotamon_similium_NC_053821_1	0.235184	5	2.782	Aparapotamon_similium_NC_053821	Aparapotamon_similium_NC_053821	double
3	NC_048882.1	Allorhynchium sp. YN	Allorhynchium_sp__YN_NC_048882_1	Insecta	Hymenoptera	Vespidae	Allorhynchium	Arthropoda	F	H	19198	14741	-0.29	0.183509	37.1	43	11.6	8.3	80.1	19.9	51.3	-0.075	-0.165	0.075	0.165	Allorhynchium_sp__YN_NC_048882_1	0.23216	5	4.221	Allorhynchium_sp__YN_NC_048882	Allorhynchium_sp__YN_NC_048882	double
3	NC_060365.1	Ips calligraphus	Ips_calligraphus_NC_060365_1	Insecta	Coleoptera	Curculionidae	Ips	Arthropoda	F	H	19144	14805	-0.232	0.0943377	39.9	35.8	14.2	10.1	75.7	24.3	45.9	0.055	-0.171	-0.055	0.171	Ips_calligraphus_NC_060365_1	0.226651	5	3.105	Ips_calligraphus_NC_060365	Ips_calligraphus_NC_060365	double
3	NC_039134.1	Vespa affinis	Vespa_affinis_NC_039134_1	Insecta	Hymenoptera	Vespidae	Vespa	Arthropoda	F	H	19109	14873	-0.409	0.212675	38.4	39.9	16.3	5.3	78.3	21.6	45.2	-0.019	-0.508	0.019	0.508	Vespa_affinis_NC_039134_1	0.221676	5	4.271	Vespa_affinis_NC_039134	Vespa_affinis_NC_039134	double
3	NC_060981.1	Apachyus feae	Apachyus_feae_NC_060981_1	Insecta	Dermaptera	Apachyidae	Apachyus	Arthropoda	F	H	19029	14692	-0.09	0.188186	30.2	31	22.5	16.3	61.2	38.8	47.3	-0.012	-0.159	0.012	0.159	Apachyus_feae_NC_060981_1	0.227915	5	2.594	Apachyus_feae_NC_060981	Apachyus_feae_NC_060981	double
3	NC_028611.1	Sepedophilus bipunctatus	Sepedophilus_bipunctatus_NC_028611_1	Insecta	Coleoptera	Staphylinidae	Sepedophilus	Arthropoda	F	H	18985	14410	-0.164	0.103503	42.9	36.6	12.2	8.3	79.5	20.5	44.9	0.079	-0.19	-0.079	0.19	Sepedophilus_bipunctatus_NC_028611_1	0.24098	5	2.573	Sepedophilus_bipunctatus_NC_028611	Sepedophilus_bipunctatus_NC_028611	double
3	NC_053901.1	Lasius spathepus	Lasius_spathepus_NC_053901_1	Insecta	Hymenoptera	Formicidae	Lasius	Arthropoda	F	H	18951	14804	-0.343	0.105535	40.6	41.9	12	5.6	82.5	17.6	47.5	-0.016	-0.364	0.016	0.364	Lasius_spathepus_NC_053901_1	0.218828	5	4.076	Lasius_spathepus_NC_053901	Lasius_spathepus_NC_053901	double
3	NC_036291.1	Orthotomicus laricis	Orthotomicus_laricis_NC_036291_1	Insecta	Coleoptera	Curculionidae	Orthotomicus	Arthropoda	F	H	18887	14615	-0.238	0.203897	38.2	35.3	16.4	10.1	73.5	26.5	45.4	0.04	-0.235	-0.04	0.235	Orthotomicus_laricis_NC_036291_1	0.226187	5	3.103	Orthotomicus_laricis_NC_036291	Orthotomicus_laricis_NC_036291	double
3	NC_060603.1	Lucanus prometheus	Lucanus_prometheus_NC_060603_1	Insecta	Coleoptera	Lucanidae	Lucanus	Arthropoda	F	H	18861	14519	-0.269	0.00212078	35.4	33.3	20	11.3	68.7	31.3	44.6	0.03	-0.278	-0.03	0.278	Lucanus_prometheus_NC_060603_1	0.23021	5	2.646	Lucanus_prometheus_NC_060603	Lucanus_prometheus_NC_060603	double
3	NC_028609.1	Scaphidium quadrimaculatum	Scaphidium_quadrimaculatum_NC_028609_1	Insecta	Coleoptera	Staphylinidae	Scaphidium	Arthropoda	F	H	18832	14440	-0.235	0.00844308	40.7	36.4	14.4	8.6	77.1	23	45	0.056	-0.251	-0.056	0.251	Scaphidium_quadrimaculatum_NC_028609_1	0.23322	5	2.635	Scaphidium_quadrimaculatum_NC_028609	Scaphidium_quadrimaculatum_NC_028609	double
3	NC_057539.1	Hydroporus analis	Hydroporus_analis_NC_057539_1	Insecta	Coleoptera	Dytiscidae	Hydroporus	Arthropoda	F	H	18823	14727	-0.171	0.182649	42	39.1	11.2	7.7	81.1	18.9	46.8	0.037	-0.189	-0.037	0.189	Hydroporus_analis_NC_057539_1	0.217606	5	2.407	Hydroporus_analis_NC_057539	Hydroporus_analis_NC_057539	double
3	NC_057540.1	Hydroporus planus	Hydroporus_planus_NC_057540_1	Insecta	Coleoptera	Dytiscidae	Hydroporus	Arthropoda	F	H	18818	14731	-0.182	0.144383	40.7	39.7	11.5	8.1	80.4	19.6	47.8	0.013	-0.172	-0.013	0.172	Hydroporus_planus_NC_057540_1	0.217186	5	2.395	Hydroporus_planus_NC_057540	Hydroporus_planus_NC_057540	double
3	NC_036289.1	Pityogenes bidentatus	Pityogenes_bidentatus_NC_036289_1	Insecta	Coleoptera	Curculionidae	Pityogenes	Arthropoda	F	H	18781	14583	-0.24	0.199776	40.2	34.9	15.2	9.7	75.1	24.9	44.6	0.071	-0.223	-0.071	0.223	Pityogenes_bidentatus_NC_036289_1	0.223524	5	3.047	Pityogenes_bidentatus_NC_036289	Pityogenes_bidentatus_NC_036289	double
3	NC_044848.1	Leptaulax koreanus	Leptaulax_koreanus_NC_044848_1	Insecta	Coleoptera	Passalidae	Leptaulax	Arthropoda	F	H	18730	14383	-0.304	0.00571276	38.4	40	14.7	6.9	78.4	21.6	46.9	-0.021	-0.362	0.021	0.362	Leptaulax_koreanus_NC_044848_1	0.232088	5	3.155	Leptaulax_koreanus_NC_044848	Leptaulax_koreanus_NC_044848	double
3	NC_012708.1	Diadegma semiclausum	Diadegma_semiclausum_NC_012708_1	Insecta	Hymenoptera	Ichneumonidae	Diadegma	Arthropoda	Parasitoid	H	18728	14721	-0.184	0.098569	44.1	43.3	7.5	5	87.4	12.5	48.3	0.009	-0.198	-0.009	0.198	Diadegma_semiclausum_NC_012708_1	0.213958	5	3.929	Diadegma_semiclausum_NC_012708	Diadegma_semiclausum_NC_012708	double
3	NC_029225.1	Opisthoplatia orientalis	Opisthoplatia_orientalis_NC_029225_1	Insecta	Blattodea	Blaberidae	Opisthoplatia	Arthropoda	F	H	18724	14681	-0.19	0.00405896	39.8	35.8	15.1	9.2	75.6	24.3	45	0.053	-0.24	-0.053	0.24	Opisthoplatia_orientalis_NC_029225_1	0.215926	5	2.453	Opisthoplatia_orientalis_NC_029225	Opisthoplatia_orientalis_NC_029225	double
3	NC_028610.1	Sciodrepoides watsoni	Sciodrepoides_watsoni_NC_028610_1	Insecta	Coleoptera	Leiodidae	Sciodrepoides	Arthropoda	F	H	18644	14434	-0.189	0.0105128	39.9	38.8	13.2	8.1	78.7	21.3	46.9	0.015	-0.244	-0.015	0.244	Sciodrepoides_watsoni_NC_028610_1	0.22581	5	2.492	Sciodrepoides_watsoni_NC_028610	Sciodrepoides_watsoni_NC_028610	double
3	NC_060844.1	Aphaenogaster japonica	Aphaenogaster_japonica_NC_060844_1	Insecta	Hymenoptera	Formicidae	Aphaenogaster	Arthropoda	F	H	18607	13799	-0.36	0.210673	41	40	13.4	5.5	81	18.9	45.5	0.012	-0.415	-0.012	0.415	Aphaenogaster_japonica_NC_060844_1	0.258397	5	4.224	Aphaenogaster_japonica_NC_060844	Aphaenogaster_japonica_NC_060844	double
3	NC_051869.1	Diaphanes citrinus	Diaphanes_citrinus_NC_051869_1	Insecta	Coleoptera	Lampyridae	Diaphanes	Arthropoda	F	H	18594	14449	-0.167	0.0809939	41.3	36.9	11.6	10.2	78.2	21.8	47.1	0.055	-0.067	-0.055	0.067	Diaphanes_citrinus_NC_051869_1	0.222868	5	2.976	Diaphanes_citrinus_NC_051869	Diaphanes_citrinus_NC_051869	double
3	NC_048517.1	Hemerobius japonicus	Hemerobius_japonicus_NC_048517_1	Insecta	Neuroptera	Hemerobiidae	Hemerobius	Arthropoda	F	H	18585	14693	-0.141	0.133226	39.7	39.4	11	9.9	79.1	20.9	49.3	0.004	-0.056	-0.004	0.056	Hemerobius_japonicus_NC_048517_1	0.209416	5	2.34	Hemerobius_japonicus_NC_048517	Hemerobius_japonicus_NC_048517	double
3	NC_036281.1	Ips sexdentatus	Ips_sexdentatus_NC_036281_1	Insecta	Coleoptera	Curculionidae	Ips	Arthropoda	F	H	18579	14612	-0.227	0.145164	38.9	37.3	14.4	9.4	76.2	23.8	46.7	0.02	-0.213	-0.02	0.213	Ips_sexdentatus_NC_036281_1	0.213521	5	3.097	Ips_sexdentatus_NC_036281	Ips_sexdentatus_NC_036281	double
5	NC_046694.1	Eurytemora affinis	Eurytemora_affinis_NC_046694_1	Hexanauplia	Calanoida	Temoridae	Eurytemora	Arthropoda	F	I	18573	14039	0.16	0.243041	28.4	37.2	14.7	19.8	65.6	34.5	57	-0.135	0.15	0.135	-0.15	Eurytemora_affinis_NC_046694_1	0.244118	5	3.277	Eurytemora_affinis_NC_046694	Eurytemora_affinis_NC_046694	single
3	NC_056105.1	Downesia tarsata	Downesia_tarsata_NC_056105_1	Insecta	Coleoptera	Chrysomelidae	Downesia	Arthropoda	F	H	18557	14176	-0.188	0.087083	42.4	36.2	12.5	8.9	78.6	21.4	45.1	0.08	-0.167	-0.08	0.167	Downesia_tarsata_NC_056105_1	0.236083	5	3.051	Downesia_tarsata_NC_056105	Downesia_tarsata_NC_056105	double
3	NC_032072.1	Trachelus tabidus	Trachelus_tabidus_NC_032072_1	Insecta	Hymenoptera	Cephidae	Trachelus	Arthropoda	F	H	18539	15197	-0.254	0.0133772	42.3	38.1	12.1	7.1	80.4	19.2	45.2	0.053	-0.262	-0.053	0.262	Trachelus_tabidus_NC_032072_1	0.180269	5	3.818	Trachelus_tabidus_NC_032072	Trachelus_tabidus_NC_032072	double
4	NC_036360.1	Dorypteryx domestica	Dorypteryx_domestica_NC_036360_1	Insecta	Psocoptera	Psyllipsocidae	Dorypteryx	Arthropoda	F	H	18512	14453	-0.294	0.0209594	37.3	34.8	16.9	10.9	72.1	27.8	45.7	0.035	-0.218	-0.035	0.218	Dorypteryx_domestica_NC_036360_1	0.219263	5	3.18	Dorypteryx_domestica_NC_036360	Dorypteryx_domestica_NC_036360	double
3	NC_060428.1	Lissorhoptrus oryzophilus	Lissorhoptrus_oryzophilus_NC_060428_1	Insecta	Coleoptera	Brachyceridae	Lissorhoptrus	Arthropoda	F	H	18510	14726	-0.211	0.132577	39.1	35.9	14.7	10.3	75	25	46.2	0.042	-0.177	-0.042	0.177	Lissorhoptrus_oryzophilus_NC_060428_1	0.20443	5	2.804	Lissorhoptrus_oryzophilus_NC_060428	Lissorhoptrus_oryzophilus_NC_060428	double
3	NC_045124.1	Dorcus tenuihirsutus	Dorcus_tenuihirsutus_NC_045124_1	Insecta	Coleoptera	Lucanidae	Dorcus	Arthropoda	F	H	18505	14541	-0.277	0.00967306	36.6	34.5	18.6	10.2	71.1	28.8	44.7	0.029	-0.292	-0.029	0.292	Dorcus_tenuihirsutus_NC_045124_1	0.214212	5	2.544	Dorcus_tenuihirsutus_NC_045124	Dorcus_tenuihirsutus_NC_045124	double
3	NC_057546.1	Nebrioporus vagrans	Nebrioporus_vagrans_NC_057546_1	Insecta	Coleoptera	Dytiscidae	Nebrioporus	Arthropoda	F	H	18504	14734	-0.235	0.157912	40.3	37.7	13	9.1	78	22.1	46.8	0.033	-0.177	-0.033	0.177	Nebrioporus_vagrans_NC_057546_1	0.20374	5	2.4	Nebrioporus_vagrans_NC_057546	Nebrioporus_vagrans_NC_057546	double
4	NC_044413.1	Longpotamon kenliense	Longpotamon_kenliense_NC_044413_1	Malacostraca	Decapoda	Potamidae	Longpotamon	Arthropoda	F	H	18499	14739	-0.3	0.198659	36.6	37.9	17.2	8.3	74.5	25.5	46.2	-0.016	-0.351	0.016	0.351	Longpotamon_kenliense_NC_044413_1	0.203254	5	2.818	Longpotamon_kenliense_NC_044413	Longpotamon_kenliense_NC_044413	double
3	NC_051485.1	Habropoda radoszkowskii	Habropoda_radoszkowskii_NC_051485_1	Insecta	Hymenoptera	Apidae	Habropoda	Arthropoda	F	H	18497	14545	0.099	0.0578472	33.7	47	8.8	10.5	80.7	19.3	57.5	-0.165	0.086	0.165	-0.086	Habropoda_radoszkowskii_NC_051485_1	0.213656	5	4.63	Habropoda_radoszkowskii_NC_051485	Habropoda_radoszkowskii_NC_051485	double
4	NC_029226.1	Longpotamon xiushuiense	Longpotamon_xiushuiense_NC_029226_1	Malacostraca	Decapoda	Potamidae	Longpotamon	Arthropoda	F	H	18460	14751	-0.288	0.200921	36	38.5	16.8	8.6	74.5	25.4	47.1	-0.033	-0.324	0.033	0.324	Longpotamon_xiushuiense_NC_029226_1	0.200921	5	2.836	Longpotamon_xiushuiense_NC_029226	Longpotamon_xiushuiense_NC_029226	double
3	NC_057952.1	Bombus longipennis	Bombus_longipennis_NC_057952_1	Insecta	Hymenoptera	Apidae	Bombus	Arthropoda	F	H	18458	14625	-0.28	0.0766605	43.2	44	8.4	4.4	87.2	12.8	48.4	-0.009	-0.314	0.009	0.314	Bombus_longipennis_NC_057952_1	0.207661	5	4.654	Bombus_longipennis_NC_057952	Bombus_longipennis_NC_057952	double
3	NC_006280.1	Trialeurodes vaporariorum	Trialeurodes_vaporariorum_NC_006280_1	Insecta	Hemiptera	Aleyrodidae	Trialeurodes	Arthropoda	F	H	18414	14174	0.206	0.229825	29.6	42.7	11.1	16.6	72.3	27.7	59.3	-0.182	0.2	0.182	-0.2	Trialeurodes_vaporariorum_NC_006280_1	0.23026	5	4.44	Trialeurodes_vaporariorum_NC_006280	Trialeurodes_vaporariorum_NC_006280	double
4	NC_005938.1	Xibalbanus tulumensis	Xibalbanus_tulumensis_NC_005938_1	Remipedia	Nectiopoda	Speleonectidae	Xibalbanus	Arthropoda	F	I	18372	14841	-0.298	0.162911	42.1	25.4	21.3	11.2	67.5	32.5	36.6	0.247	-0.31	-0.247	0.31	Xibalbanus_tulumensis_NC_005938_1	0.192195	5	3.067	Xibalbanus_tulumensis_NC_005938	Xibalbanus_tulumensis_NC_005938	double
3	NC_046020.1	Vespa simillima simillima	Vespa_simillima_simillima_NC_046020_1	Insecta	Hymenoptera	Vespidae	Vespa	Arthropoda	F	H	18340	14906	-0.376	0.1	39.8	41.9	12.8	5.5	81.7	18.3	47.4	-0.026	-0.401	0.026	0.401	Vespa_simillima_simillima_NC_046020_1	0.187241	5	4.18	Vespa_simillima_simillima_NC_046020	Vespa_simillima_simillima_NC_046020	double
3	NC_053358.1	Callosobruchus maculatus	Callosobruchus_maculatus_NC_053358_1	Insecta	Coleoptera	Chrysomelidae	Callosobruchus	Arthropoda	F	I	18321	14594	-0.164	0.129906	40.2	38.6	12.3	9	78.8	21.3	47.6	0.02	-0.157	-0.02	0.157	Callosobruchus_maculatus_NC_053358_1	0.203428	5	2.577	Callosobruchus_maculatus_NC_053358	Callosobruchus_maculatus_NC_053358	double
3	NC_042500.1	Gonioctena intermedia	Gonioctena_intermedia_NC_042500_1	Insecta	Coleoptera	Chrysomelidae	Gonioctena	Arthropoda	F	H	18293	14521	-0.186	0.00623189	41	37.3	13.3	8.4	78.3	21.7	45.7	0.047	-0.227	-0.047	0.227	Gonioctena_intermedia_NC_042500_1	0.206199	5	2.61	Gonioctena_intermedia_NC_042500	Gonioctena_intermedia_NC_042500	double
3	NC_046423.1	Acropyga kinomurai	Acropyga_kinomurai_NC_046423_1	Insecta	Hymenoptera	Formicidae	Acropyga	Arthropoda	F	H	18287	15028	-0.367	0.173183	43.3	39.7	12	5	83	17	44.7	0.043	-0.414	-0.043	0.414	Acropyga_kinomurai_NC_046423_1	0.178214	5	4.33	Acropyga_kinomurai_NC_046423	Acropyga_kinomurai_NC_046423	double
3	NC_034756.1	Phaneroptera gracilis	Phaneroptera_gracilis_NC_034756_1	Insecta	Orthoptera	Tettigoniidae	Phaneroptera	Arthropoda	F	H	18255	14806	-0.236	0.104136	37	35.2	17.3	10.5	72.2	27.8	45.7	0.026	-0.244	-0.026	0.244	Phaneroptera_gracilis_NC_034756_1	0.188935	5	2.394	Phaneroptera_gracilis_NC_034756	Phaneroptera_gracilis_NC_034756	double
3	NC_045123.1	Dorcus ursulus	Dorcus_ursulus_NC_045123_1	Insecta	Coleoptera	Lucanidae	Dorcus	Arthropoda	F	H	18220	14545	-0.277	0.0111416	37	34.6	18.5	9.9	71.6	28.4	44.5	0.034	-0.301	-0.034	0.301	Dorcus_ursulus_NC_045123_1	0.201701	5	2.544	Dorcus_ursulus_NC_045123	Dorcus_ursulus_NC_045123	double
4	NC_039656.1	Pteromalus puparum	Pteromalus_puparum_NC_039656_1	Insecta	Hymenoptera	Pteromalidae	Pteromalus	Arthropoda	Parasitoid	H	18217	14644	0.078	0.0147664	41.6	43.1	7.1	8.2	84.7	15.3	51.3	-0.018	0.067	0.018	-0.067	Pteromalus_puparum_NC_039656_1	0.196135	5	4.034	Pteromalus_puparum_NC_039656	Pteromalus_puparum_NC_039656	double
3	NC_007379.1	Geothelphusa dehaani	Geothelphusa_dehaani_NC_007379_1	Malacostraca	Decapoda	Potamidae	Geothelphusa	Arthropoda	F	H	18197	14773	-0.306	0.151563	36.9	38	16.8	8.3	74.9	25.1	46.3	-0.014	-0.341	0.014	0.341	Geothelphusa_dehaani_NC_007379_1	0.188163	5	2.797	Geothelphusa_dehaani_NC_007379	Geothelphusa_dehaani_NC_007379	double
3	NC_019593.1	Gorpis humeralis	Gorpis_humeralis_NC_019593_1	Insecta	Hemiptera	Nabidae	Gorpis	Arthropoda	F	H	18165	14598	-0.154	0.121112	39.3	33.3	15.7	11.7	72.6	27.4	45	0.082	-0.145	-0.082	0.145	Gorpis_humeralis_NC_019593_1	0.196367	5	2.888	Gorpis_humeralis_NC_019593	Gorpis_humeralis_NC_019593	double
3	NC_009809.1	Culicoides arakawae	Culicoides_arakawae_NC_009809_1	Insecta	Diptera	Ceratopogonidae	Culicoides	Arthropoda	MP	H	18135	14725	-0.209	0.108795	39	38.3	14	8.6	77.3	22.6	46.9	0.009	-0.237	-0.009	0.237	Culicoides_arakawae_NC_009809_1	0.188034	5	2.5	Culicoides_arakawae_NC_009809	Culicoides_arakawae_NC_009809	double
3	NC_021424.1	Sinochlora longifissa	Sinochlora_longifissa_NC_021424_1	Insecta	Orthoptera	Tettigoniidae	Sinochlora	Arthropoda	F	H	18133	14693	-0.302	0.186952	34.6	34.5	20.1	10.9	69.1	31	45.4	0.002	-0.298	-0.002	0.298	Sinochlora_longifissa_NC_021424_1	0.189709	5	2.456	Sinochlora_longifissa_NC_021424	Sinochlora_longifissa_NC_021424	double
3	NC_043928.1	Dorcus hansi	Dorcus_hansi_NC_043928_1	Insecta	Coleoptera	Lucanidae	Dorcus	Arthropoda	F	H	18130	14325	-0.292	0.019636	37.1	33.2	19.5	10.1	70.3	29.6	43.3	0.055	-0.315	-0.055	0.315	Dorcus_hansi_NC_043928_1	0.209873	5	2.568	Dorcus_hansi_NC_043928	Dorcus_hansi_NC_043928	double
4	NC_033361.1	Gmelinoides fasciatus	Gmelinoides_fasciatus_NC_033361_1	Malacostraca	Amphipoda	Micruropodidae	Gmelinoides	Arthropoda	F	H	18114	14017	-0.286	0.226013	32.9	33	22.2	11.9	65.9	34.1	44.9	-0.001	-0.303	0.001	0.303	Gmelinoides_fasciatus_NC_033361_1	0.226179	5	3.723	Gmelinoides_fasciatus_NC_033361	Gmelinoides_fasciatus_NC_033361	double
3	NC_030764.1	Sitophilus zeamais	Sitophilus_zeamais_NC_030764_1	Insecta	Coleoptera	Curculionidae	Sitophilus	Arthropoda	F	H	18105	14622	-0.264	0.158906	39.9	36	15.4	8.7	75.9	24.1	44.7	0.052	-0.278	-0.052	0.278	Sitophilus_zeamais_NC_030764_1	0.192378	5	2.952	Sitophilus_zeamais_NC_030764	Sitophilus_zeamais_NC_030764	double
3	NC_040301.1	Ceratophyllus wui	Ceratophyllus_wui_NC_040301_1	Insecta	Siphonaptera	Ceratophyllidae	Ceratophyllus	Arthropoda	EctoP	H	18081	14465	-0.236	0.0122228	37.7	39	13.8	9.5	76.7	23.3	48.5	-0.017	-0.184	0.017	0.184	Ceratophyllus_wui_NC_040301_1	0.199989	5	2.613	Ceratophyllus_wui_NC_040301	Ceratophyllus_wui_NC_040301	double
3	NC_044792.1	Pyrocoelia thibetana	Pyrocoelia_thibetana_NC_044792_1	Insecta	Coleoptera	Lampyridae	Pyrocoelia	Arthropoda	F	H	18054	14450	-0.182	0.199623	41.7	34.7	13.3	10.2	76.4	23.5	44.9	0.091	-0.133	-0.091	0.133	Pyrocoelia_thibetana_NC_044792_1	0.199623	5	2.884	Pyrocoelia_thibetana_NC_044792	Pyrocoelia_thibetana_NC_044792	double
4	NC_034994.1	Sinochlora szechwanensis	Sinochlora_szechwanensis_NC_034994_1	Insecta	Orthoptera	Tettigoniidae	Sinochlora	Arthropoda	F	H	18051	14693	-0.309	0.183259	34.5	35	19.9	10.6	69.5	30.5	45.6	-0.007	-0.306	0.007	0.306	Sinochlora_szechwanensis_NC_034994_1	0.186028	5	2.468	Sinochlora_szechwanensis_NC_034994	Sinochlora_szechwanensis_NC_034994	double
3	NC_050892.1	Trigonopterus kotamobagensis	Trigonopterus_kotamobagensis_NC_050892_1	Insecta	Coleoptera	Curculionidae	Trigonopterus	Arthropoda	F	I	18038	14618	-0.324	0.1896	36.2	33	21.1	9.6	69.2	30.7	42.6	0.047	-0.373	-0.047	0.373	Trigonopterus_kotamobagensis_NC_050892_1	0.1896	5	3.171	Trigonopterus_kotamobagensis_NC_050892	Trigonopterus_kotamobagensis_NC_050892	double
3	NC_042806.1	Cloresmus pulchellus	Cloresmus_pulchellus_NC_042806_1	Insecta	Hemiptera	Coreidae	Cloresmus	Arthropoda	F	H	18022	14546	-0.201	0.00194207	41.8	30	17.4	10.8	71.8	28.2	40.8	0.165	-0.236	-0.165	0.236	Cloresmus_pulchellus_NC_042806_1	0.192875	5	2.998	Cloresmus_pulchellus_NC_042806	Cloresmus_pulchellus_NC_042806	double
3	NC_044793.1	Diaphanes pectinealis	Diaphanes_pectinealis_NC_044793_1	Insecta	Coleoptera	Lampyridae	Diaphanes	Arthropoda	F	H	17981	14405	-0.18	0.198877	42.9	35.6	12.2	9.3	78.5	21.5	44.9	0.093	-0.132	-0.093	0.132	Diaphanes_pectinealis_NC_044793_1	0.198877	5	2.98	Diaphanes_pectinealis_NC_044793	Diaphanes_pectinealis_NC_044793	double
3	NC_048883.1	Antodynerus aff. limbatus YN	Antodynerus_aff__limbatus_YN_NC_048883_1	Insecta	Hymenoptera	Vespidae	Antodynerus	Arthropoda	F	H	17975	14877	-0.301	0.123616	41.2	41.7	10.9	6.2	82.9	17.1	47.9	-0.006	-0.275	0.006	0.275	Antodynerus_aff__limbatus_YN_NC_048883_1	0.17235	5	4.08	Antodynerus_aff__limbatus_YN_NC_048883	Antodynerus_aff__limbatus_YN_NC_048883	double
3	NC_039949.1	Orancistrocerus aterrimus	Orancistrocerus_aterrimus_NC_039949_1	Insecta	Hymenoptera	Vespidae	Orancistrocerus	Arthropoda	F	H	17972	14783	-0.338	0.11746	39.5	39.9	12.5	8.1	79.4	20.6	48	-0.005	-0.216	0.005	0.216	Orancistrocerus_aterrimus_NC_039949_1	0.177443	5	4.31	Orancistrocerus_aterrimus_NC_039949	Orancistrocerus_aterrimus_NC_039949	double
3	NC_037218.1	Rhadinosa nigrocyanea	Rhadinosa_nigrocyanea_NC_037218_1	Insecta	Coleoptera	Chrysomelidae	Rhadinosa	Arthropoda	F	H	17965	14349	-0.204	0.0341776	43.2	33.4	13.9	9.5	76.6	23.4	42.9	0.129	-0.187	-0.129	0.187	Rhadinosa_nigrocyanea_NC_037218_1	0.20128	5	3.008	Rhadinosa_nigrocyanea_NC_037218	Rhadinosa_nigrocyanea_NC_037218	double
3	NC_044791.1	Diaphanes mendax	Diaphanes_mendax_NC_044791_1	Insecta	Coleoptera	Lampyridae	Diaphanes	Arthropoda	F	H	17959	14446	-0.185	0.195612	43.1	34.8	12.7	9.4	77.9	22.1	44.2	0.107	-0.147	-0.107	0.147	Diaphanes_mendax_NC_044791_1	0.195612	5	2.89	Diaphanes_mendax_NC_044791	Diaphanes_mendax_NC_044791	double
3	NC_038212.1	Macrodorcas seguyi	Macrodorcas_seguyi_NC_038212_1	Insecta	Coleoptera	Lucanidae	Macrodorcas	Arthropoda	F	H	17955	14521	-0.299	0.0199944	37.8	33.4	18.8	10	71.2	28.8	43.4	0.061	-0.307	-0.061	0.307	Macrodorcas_seguyi_NC_038212_1	0.191256	5	2.57	Macrodorcas_seguyi_NC_038212	Macrodorcas_seguyi_NC_038212	double
3	NC_036278.1	Eucinetus haemorrhoidalis	Eucinetus_haemorrhoidalis_NC_036278_1	Insecta	Coleoptera	Eucinetidae	Eucinetus	Arthropoda	F	H	17954	14497	-0.187	0.160577	41	40	11.3	7.7	81	19	47.7	0.013	-0.19	-0.013	0.19	Eucinetus_haemorrhoidalis_NC_036278_1	0.192548	5	2.745	Eucinetus_haemorrhoidalis_NC_036278	Eucinetus_haemorrhoidalis_NC_036278	double
3	NC_045236.1	Aphis glycines	Aphis_glycines_NC_045236_1	Insecta	Hemiptera	Aphididae	Aphis	Arthropoda	F	I	17954	14379	-0.277	0.134622	45.7	38.6	10.2	5.5	84.3	15.7	44.1	0.085	-0.298	-0.085	0.298	Aphis_glycines_NC_045236_1	0.19912	5	3.928	Aphis_glycines_NC_045236	Aphis_glycines_NC_045236	double
3	NC_028153.1	Neuronema laminatum	Neuronema_laminatum_NC_028153_1	Insecta	Neuroptera	Hemerobiidae	Neuronema	Arthropoda	F	H	17948	14695	-0.17	0.0188322	40.6	38.8	12.2	8.4	79.4	20.6	47.2	0.022	-0.188	-0.022	0.188	Neuronema_laminatum_NC_028153_1	0.181246	5	2.44	Neuronema_laminatum_NC_028153	Neuronema_laminatum_NC_028153	double
6	NC_019627.1	Calanus hyperboreus	Calanus_hyperboreus_NC_019627_1	Hexanauplia	Calanoida	Calanidae	Calanus	Arthropoda	F	I	17910	14211	0.136	0.206477	31.1	35.1	14.2	19.5	66.2	33.7	54.6	-0.06	0.159	0.06	-0.159	Calanus_hyperboreus_NC_019627_1	0.206533	5	3.04	Calanus_hyperboreus_NC_019627	Calanus_hyperboreus_NC_019627	double
6	NC_039112.1	Munida isos	Munida_isos_NC_039112_1	Malacostraca	Decapoda	Munididae	Munida	Arthropoda	F	H	17910	14810	-0.301	0.173032	35.1	30.4	23.1	11.4	65.5	34.5	41.8	0.071	-0.34	-0.071	0.34	Munida_isos_NC_039112_1	0.173088	5	2.576	Munida_isos_NC_039112	Munida_isos_NC_039112	double
3	NC_057544.1	Lioporeus pilatei	Lioporeus_pilatei_NC_057544_1	Insecta	Coleoptera	Dytiscidae	Lioporeus	Arthropoda	F	H	17905	14711	-0.319	0.146495	39.8	36.8	15.6	7.8	76.6	23.4	44.6	0.039	-0.332	-0.039	0.332	Lioporeus_pilatei_NC_057544_1	0.178386	5	2.435	Lioporeus_pilatei_NC_057544	Lioporeus_pilatei_NC_057544	double
4	NC_036946.1	Longpotamon yangtsekiense	Longpotamon_yangtsekiense_NC_036946_1	Malacostraca	Decapoda	Potamidae	Longpotamon	Arthropoda	F	H	17885	14706	-0.273	0.173553	36	38.9	16.2	8.8	74.9	25	47.7	-0.039	-0.298	0.039	0.298	Longpotamon_yangtsekiense_NC_036946_1	0.177747	5	2.838	Longpotamon_yangtsekiense_NC_036946	Longpotamon_yangtsekiense_NC_036946	double
3	NC_044146.1	Eustenogaster scitula	Eustenogaster_scitula_NC_044146_1	Insecta	Hymenoptera	Vespidae	Eustenogaster	Arthropoda	F	H	17867	14346	-0.307	0.0282644	41.8	41.7	11.1	5.4	83.5	16.5	47.1	0.001	-0.343	-0.001	0.343	Eustenogaster_scitula_NC_044146_1	0.197067	5	4.427	Eustenogaster_scitula_NC_044146	Eustenogaster_scitula_NC_044146	double
3	NC_057550.1	Porhydrus obliquesignatus	Porhydrus_obliquesignatus_NC_057550_1	Insecta	Coleoptera	Dytiscidae	Porhydrus	Arthropoda	F	H	17865	14701	-0.228	0.155164	41.4	38.1	12.3	8.3	79.5	20.6	46.4	0.042	-0.193	-0.042	0.193	Porhydrus_obliquesignatus_NC_057550_1	0.177106	5	2.476	Porhydrus_obliquesignatus_NC_057550	Porhydrus_obliquesignatus_NC_057550	double
3	NC_045068.1	Cyclommatus strigiceps vitalisi	Cyclommatus_strigiceps_vitalisi_NC_045068_1	Insecta	Coleoptera	Lucanidae	Cyclommatus	Arthropoda	F	H	17853	14499	-0.231	0.00184843	39.2	34.4	16.8	9.6	73.6	26.4	44	0.064	-0.271	-0.064	0.271	Cyclommatus_strigiceps_vitalisi_NC_045068_1	0.187868	5	2.649	Cyclommatus_strigiceps_vitalisi_NC_045068	Cyclommatus_strigiceps_vitalisi_NC_045068	double
3	NC_057542.1	Iberoporus pluto	Iberoporus_pluto_NC_057542_1	Insecta	Coleoptera	Dytiscidae	Iberoporus	Arthropoda	F	H	17834	14704	-0.23	0.146069	40.3	39.6	11.9	8.1	79.9	20	47.7	0.008	-0.19	-0.008	0.19	Iberoporus_pluto_NC_057542_1	0.175507	5	2.461	Iberoporus_pluto_NC_057542	Iberoporus_pluto_NC_057542	double
3	NC_056196.1	Necrodes littoralis	Necrodes_littoralis_NC_056196_1	Insecta	Coleoptera	Silphidae	Necrodes	Arthropoda	F	H	17830	14649	-0.172	0.00213124	39.3	37	14.2	9.5	76.3	23.7	46.5	0.029	-0.199	-0.029	0.199	Necrodes_littoralis_NC_056196_1	0.178407	5	2.43	Necrodes_littoralis_NC_056196	Necrodes_littoralis_NC_056196	double
3	NC_046481.1	Hippodamia variegata	Hippodamia_variegata_NC_046481_1	Insecta	Coleoptera	Coccinellidae	Hippodamia	Arthropoda	F	H	17823	14447	-0.191	0.100208	39.9	37.6	13.2	9.2	77.5	22.4	46.8	0.029	-0.179	-0.029	0.179	Hippodamia_variegata_NC_046481_1	0.189418	5	3.014	Hippodamia_variegata_NC_046481	Hippodamia_variegata_NC_046481	double
3	NC_013238.1	Evania appendigaster	Evania_appendigaster_NC_013238_1	Insecta	Hymenoptera	Evaniidae	Evania	Arthropoda	Parasitoid	H	17817	14544	-0.363	0.0532076	39.9	37.8	15	7.2	77.7	22.2	45	0.027	-0.349	-0.027	0.349	Evania_appendigaster_NC_013238_1	0.183701	5	4.704	Evania_appendigaster_NC_013238	Evania_appendigaster_NC_013238	double
3	NC_054278.1	Dorcus koreanus	Dorcus_koreanus_NC_054278_1	Insecta	Coleoptera	Lucanidae	Dorcus	Arthropoda	F	H	17787	14545	-0.275	0.00871423	36.3	32.4	20.2	11.1	68.7	31.3	43.5	0.057	-0.29	-0.057	0.29	Dorcus_koreanus_NC_054278_1	0.182268	5	2.544	Dorcus_koreanus_NC_054278	Dorcus_koreanus_NC_054278	double
3	NC_039157.1	Phymatostetha huangshanensis (nomen nudum)	Phymatostetha_huangshanensis__nomen_nudum__NC_039157_1	Insecta	Hemiptera	Cercopidae	Phymatostetha	Arthropoda	F	H	17785	14538	-0.194	0.0026989	43.4	34.4	12.5	9.7	77.8	22.2	44.1	0.115	-0.129	-0.115	0.129	Phymatostetha_huangshanensis__nomen_nudum__NC_039157_1	0.18257	5	2.886	Phymatostetha_huangshanensis__nomen_nudum__NC_039157	Phymatostetha_huangshanensis__nomen_nudum__NC_039157	double
3	NC_040931.1	Myllocerinus aurolineatus	Myllocerinus_aurolineatus_NC_040931_1	Insecta	Coleoptera	Curculionidae	Myllocerinus	Arthropoda	F	H	17762	14646	-0.231	0.175374	39.6	35.9	14.5	10	75.5	24.5	45.9	0.048	-0.183	-0.048	0.183	Myllocerinus_aurolineatus_NC_040931_1	0.175431	5	2.891	Myllocerinus_aurolineatus_NC_040931	Myllocerinus_aurolineatus_NC_040931	double
3	NC_024641.1	Lygus hesperus	Lygus_hesperus_NC_024641_1	Insecta	Hemiptera	Miridae	Lygus	Arthropoda	F	H	17747	14573	-0.18	0.00760692	42.8	32.5	14.6	10	75.3	24.6	42.5	0.136	-0.187	-0.136	0.187	Lygus_hesperus_NC_024641_1	0.178847	5	2.842	Lygus_hesperus_NC_024641	Lygus_hesperus_NC_024641	double
3	NC_050851.1	Prosopocoilus astacoides	Prosopocoilus_astacoides_NC_050851_1	Insecta	Coleoptera	Lucanidae	Prosopocoilus	Arthropoda	F	H	17746	14551	-0.295	0.0227657	36.6	32.1	20.4	10.9	68.7	31.3	43	0.066	-0.303	-0.066	0.303	Prosopocoilus_astacoides_NC_050851_1	0.180041	5	2.522	Prosopocoilus_astacoides_NC_050851	Prosopocoilus_astacoides_NC_050851	double
3	NC_003970.1	Pyrocoelia rufa	Pyrocoelia_rufa_NC_003970_1	Insecta	Coleoptera	Lampyridae	Pyrocoelia	Arthropoda	F	H	17739	14481	-0.195	0.0978635	42.8	34.6	13.1	9.5	77.4	22.6	44.1	0.106	-0.158	-0.106	0.158	Pyrocoelia_rufa_NC_003970_1	0.183663	5	2.917	Pyrocoelia_rufa_NC_003970	Pyrocoelia_rufa_NC_003970	double
3	NC_049880.1	Elaeidobius kamerunicus	Elaeidobius_kamerunicus_NC_049880_1	Insecta	Coleoptera	Curculionidae	Elaeidobius	Arthropoda	F	H	17729	14581	-0.214	0.0315867	39.9	33.6	16.2	10.3	73.5	26.5	43.9	0.085	-0.224	-0.085	0.224	Elaeidobius_kamerunicus_NC_049880_1	0.177562	5	2.871	Elaeidobius_kamerunicus_NC_049880	Elaeidobius_kamerunicus_NC_049880	double
3	NC_057194.1	Amegilla calceifera	Amegilla_calceifera_NC_057194_1	Insecta	Hymenoptera	Apidae	Amegilla	Arthropoda	F	H	17728	14646	0.162	0.0299526	35.8	43.5	8.8	11.9	79.3	20.7	55.4	-0.098	0.146	0.098	-0.146	Amegilla_calceifera_NC_057194_1	0.173849	5	4.747	Amegilla_calceifera_NC_057194	Amegilla_calceifera_NC_057194	double
3	NC_030592.1	Abax parallelepipedus	Abax_parallelepipedus_NC_030592_1	Insecta	Coleoptera	Carabidae	Abax	Arthropoda	F	H	17701	14759	-0.187	0.00593187	41.7	37.5	12.4	8.3	79.2	20.7	45.8	0.053	-0.197	-0.053	0.197	Abax_parallelepipedus_NC_030592_1	0.166205	5	2.39	Abax_parallelepipedus_NC_030592	Abax_parallelepipedus_NC_030592	double
4	NC_029372.1	Rhynchocinetes durbanensis	Rhynchocinetes_durbanensis_NC_029372_1	Malacostraca	Decapoda	Rhynchocinetidae	Rhynchocinetes	Arthropoda	F	H	17695	14929	-0.271	0.156259	33	35.1	20.3	11.5	68.1	31.8	46.6	-0.032	-0.276	0.032	0.276	Rhynchocinetes_durbanensis_NC_029372_1	0.156315	5	2.847	Rhynchocinetes_durbanensis_NC_029372	Rhynchocinetes_durbanensis_NC_029372	double
3	NC_021401.1	Apis florea	Apis_florea_NC_021401_1	Insecta	Hymenoptera	Apidae	Apis	Arthropoda	F	H	17694	14768	-0.244	0.0530688	44.7	41.4	8.8	5.1	86.1	13.9	46.5	0.038	-0.27	-0.038	0.27	Apis_florea_NC_021401_1	0.165367	5	4.644	Apis_florea_NC_021401	Apis_florea_NC_021401	double
3	NC_044787.1	Diaphanes nubilus	Diaphanes_nubilus_NC_044787_1	Insecta	Coleoptera	Lampyridae	Diaphanes	Arthropoda	F	H	17683	14419	-0.14	0.184584	42.6	35.7	11.8	10	78.3	21.8	45.7	0.088	-0.084	-0.088	0.084	Diaphanes_nubilus_NC_044787_1	0.184584	5	2.986	Diaphanes_nubilus_NC_044787	Diaphanes_nubilus_NC_044787	double
3	NC_056370.1	Euaspis polynesia	Euaspis_polynesia_NC_056370_1	Insecta	Hymenoptera	Megachilidae	Euaspis	Arthropoda	F	H	17682	14519	-0.269	0.0796856	42.9	43	8.6	5.4	85.9	14	48.4	-0.001	-0.227	0.001	0.227	Euaspis_polynesia_NC_056370_1	0.178882	5	4.357	Euaspis_polynesia_NC_056370	Euaspis_polynesia_NC_056370	double
3	NC_044713.1	Anthonomus rectirostris	Anthonomus_rectirostris_NC_044713_1	Insecta	Coleoptera	Curculionidae	Anthonomus	Arthropoda	F	H	17676	14547	-0.203	0.109131	38.9	35.7	15.3	10.1	74.6	25.4	45.8	0.043	-0.205	-0.043	0.205	Anthonomus_rectirostris_NC_044713_1	0.17702	5	3.04	Anthonomus_rectirostris_NC_044713	Anthonomus_rectirostris_NC_044713	double
3	NC_044409.1	Exorista japonica	Exorista_japonica_NC_044409_1	Insecta	Diptera	Tachinidae	Exorista	Arthropoda	Parasitoid	H	17663	14705	-0.14	0.0104739	41.8	39.6	10.7	7.9	81.4	18.6	47.5	0.026	-0.154	-0.026	0.154	Exorista_japonica_NC_044409_1	0.167469	5	2.524	Exorista_japonica_NC_044409	Exorista_japonica_NC_044409	double
3	NC_028613.1	Tetartopeus terminatus	Tetartopeus_terminatus_NC_028613_1	Insecta	Coleoptera	Staphylinidae	Tetartopeus	Arthropoda	F	H	17652	14328	-0.194	0.0149558	40.8	37	13.5	8.7	77.8	22.2	45.7	0.049	-0.215	-0.049	0.215	Tetartopeus_terminatus_NC_028613_1	0.188307	5	2.591	Tetartopeus_terminatus_NC_028613	Tetartopeus_terminatus_NC_028613	double
5	NC_027510.1	Neomysis japonica	Neomysis_japonica_NC_027510_1	Malacostraca	Mysida	Mysidae	Neomysis	Arthropoda	F	H	17652	14617	-0.109	0.171425	36.5	38	13.8	11.7	74.5	25.5	49.7	-0.021	-0.085	0.021	0.085	Neomysis_japonica_NC_027510_1	0.171935	5	3.087	Neomysis_japonica_NC_027510	Neomysis_japonica_NC_027510	double
3	NC_052889.1	Gymnochthebius lividus	Gymnochthebius_lividus_NC_052889_1	Insecta	Coleoptera	Hydraenidae	Gymnochthebius	Arthropoda	F	I	17647	14531	-0.159	0.0328668	39.8	41.4	11.1	7.8	81.2	18.9	49.2	-0.02	-0.172	0.02	0.172	Gymnochthebius_lividus_NC_052889_1	0.176574	5	2.45	Gymnochthebius_lividus_NC_052889	Gymnochthebius_lividus_NC_052889	double
3	NC_028608.1	Rugilus geniculatus	Rugilus_geniculatus_NC_028608_1	Insecta	Coleoptera	Staphylinidae	Rugilus	Arthropoda	F	H	17640	14385	-0.134	0.0153061	39.4	39.9	12.1	8.6	79.3	20.7	48.5	-0.007	-0.165	0.007	0.165	Rugilus_geniculatus_NC_028608_1	0.184524	5	2.529	Rugilus_geniculatus_NC_028608	Rugilus_geniculatus_NC_028608	double
3	NC_044790.1	Pyrocoelia praetexta	Pyrocoelia_praetexta_NC_044790_1	Insecta	Coleoptera	Lampyridae	Pyrocoelia	Arthropoda	F	H	17634	14452	-0.184	0.180447	42.4	34.6	13.4	9.5	77	22.9	44.1	0.101	-0.172	-0.101	0.172	Pyrocoelia_praetexta_NC_044790_1	0.180447	5	2.893	Pyrocoelia_praetexta_NC_044790	Pyrocoelia_praetexta_NC_044790	double
3	NC_058236.1	Oenopia sauzeti	Oenopia_sauzeti_NC_058236_1	Insecta	Coleoptera	Coccinellidae	Oenopia	Arthropoda	F	H	17630	14492	-0.167	0.074532	41.3	38.8	11.6	8.3	80.1	19.9	47.1	0.032	-0.163	-0.032	0.163	Oenopia_sauzeti_NC_058236_1	0.177992	5	2.999	Oenopia_sauzeti_NC_058236	Oenopia_sauzeti_NC_058236	double
3	NC_060647.1	Messor structor	Messor_structor_NC_060647_1	Insecta	Hymenoptera	Formicidae	Messor	Arthropoda	F	H	17628	14862	-0.287	0.148003	39.9	44.1	10.3	5.6	84	15.9	49.7	-0.05	-0.297	0.05	0.297	Messor_structor_NC_060647_1	0.156909	5	4.128	Messor_structor_NC_060647	Messor_structor_NC_060647	double
3	NC_021748.1	Nilaparvata lugens	Nilaparvata_lugens_NC_021748_1	Insecta	Hemiptera	Delphacidae	Nilaparvata	Arthropoda	F	H	17619	14334	-0.231	0.0485839	42	35	13.6	9.4	77	23	44.4	0.091	-0.182	-0.091	0.182	Nilaparvata_lugens_NC_021748_1	0.186446	5	3.807	Nilaparvata_lugens_NC_021748	Nilaparvata_lugens_NC_021748	double
3	NC_059694.1	Diaphanosoma excisum	Diaphanosoma_excisum_NC_059694_1	Branchiopoda	Diplostraca	Sididae	Diaphanosoma	Arthropoda	F	H	17615	14515	0.163	0.167868	31.9	33.5	14.1	20.6	65.4	34.7	54.1	-0.025	0.186	0.025	-0.186	Diaphanosoma_excisum_NC_059694_1	0.175986	5	2.822	Diaphanosoma_excisum_NC_059694	Diaphanosoma_excisum_NC_059694	double
3	NC_049011.1	Bottapotamon lingchuanense	Bottapotamon_lingchuanense_NC_049011_1	Malacostraca	Decapoda	Potamidae	Bottapotamon	Arthropoda	F	H	17612	14799	-0.324	0.159494	35.5	36.8	18.9	8.7	72.3	27.6	45.5	-0.018	-0.368	0.018	0.368	Bottapotamon_lingchuanense_NC_049011_1	0.159721	5	2.811	Bottapotamon_lingchuanense_NC_049011	Bottapotamon_lingchuanense_NC_049011	double
3	NC_030765.1	Sitophilus oryzae	Sitophilus_oryzae_NC_030765_1	Insecta	Coleoptera	Curculionidae	Sitophilus	Arthropoda	F	H	17602	14620	-0.253	0.16322	39.9	36.4	15	8.6	76.3	23.6	45	0.046	-0.269	-0.046	0.269	Sitophilus_oryzae_NC_030765_1	0.169413	5	2.971	Sitophilus_oryzae_NC_030765	Sitophilus_oryzae_NC_030765	double
3	NC_059935.1	Notostomus gibbosus	Notostomus_gibbosus_NC_059935_1	Malacostraca	Decapoda	Oplophoridae	Notostomus	Arthropoda	F	H	17590	14690	-0.265	0.0527572	31.6	28.7	24.7	14.9	60.3	39.6	43.6	0.048	-0.247	-0.048	0.247	Notostomus_gibbosus_NC_059935_1	0.164866	5	2.443	Notostomus_gibbosus_NC_059935	Notostomus_gibbosus_NC_059935	double
3	NC_028600.1	Euryusa optabilis	Euryusa_optabilis_NC_028600_1	Insecta	Coleoptera	Staphylinidae	Euryusa	Arthropoda	F	H	17577	14564	-0.225	0.0129715	40.5	38	13.6	7.9	78.5	21.5	45.9	0.031	-0.265	-0.031	0.265	Euryusa_optabilis_NC_028600_1	0.171417	5	2.503	Euryusa_optabilis_NC_028600	Euryusa_optabilis_NC_028600	double
3	NC_053918.1	Parazyginella tiani	Parazyginella_tiani_NC_053918_1	Insecta	Hemiptera	Cicadellidae	Parazyginella	Arthropoda	F	H	17562	14230	-0.144	0.00592188	42.1	34.3	13.2	10.4	76.4	23.6	44.7	0.103	-0.117	-0.103	0.117	Parazyginella_tiani_NC_053918_1	0.189728	5	3.454	Parazyginella_tiani_NC_053918	Parazyginella_tiani_NC_053918	double
5	NC_041154.1	Ombrastacoides huonensis	Ombrastacoides_huonensis_NC_041154_1	Malacostraca	Decapoda	Parastacidae	Ombrastacoides	Arthropoda	F	H	17559	14753	-0.257	0.159405	29.1	32.8	24.2	13.9	61.9	38.1	46.7	-0.059	-0.27	0.059	0.27	Ombrastacoides_huonensis_NC_041154_1	0.159804	5	2.811	Ombrastacoides_huonensis_NC_041154	Ombrastacoides_huonensis_NC_041154	double
3	NC_042417.1	Aiolocaria hexaspilota	Aiolocaria_hexaspilota_NC_042417_1	Insecta	Coleoptera	Coccinellidae	Aiolocaria	Arthropoda	F	H	17549	14446	-0.173	0.085475	41.5	38.7	11.8	8	80.2	19.8	46.7	0.035	-0.19	-0.035	0.19	Aiolocaria_hexaspilota_NC_042417_1	0.176819	5	2.952	Aiolocaria_hexaspilota_NC_042417	Aiolocaria_hexaspilota_NC_042417	double
3	NC_022677.1	Nesidiocoris tenuis	Nesidiocoris_tenuis_NC_022677_1	Insecta	Hemiptera	Miridae	Nesidiocoris	Arthropoda	F	H	17544	14377	-0.093	0.000683995	41.3	33.7	13.9	11.1	75	25	44.8	0.103	-0.114	-0.103	0.114	Nesidiocoris_tenuis_NC_022677_1	0.180518	5	3.039	Nesidiocoris_tenuis_NC_022677	Nesidiocoris_tenuis_NC_022677	double
3	NC_057551.1	Rhithrodytes bimaculatus	Rhithrodytes_bimaculatus_NC_057551_1	Insecta	Coleoptera	Dytiscidae	Rhithrodytes	Arthropoda	F	H	17524	14699	-0.266	0.1252	39.8	38.2	13.8	8.3	78	22.1	46.5	0.021	-0.25	-0.021	0.25	Rhithrodytes_bimaculatus_NC_057551_1	0.161207	5	2.442	Rhithrodytes_bimaculatus_NC_057551	Rhithrodytes_bimaculatus_NC_057551	double
3	NC_013252.1	Rhopaea magnicornis	Rhopaea_magnicornis_NC_013252_1	Insecta	Coleoptera	Scarabaeidae	Rhopaea	Arthropoda	F	H	17522	14617	-0.233	0.00445155	38	37.6	15.1	9.3	75.6	24.4	46.9	0.005	-0.238	-0.005	0.238	Rhopaea_magnicornis_NC_013252_1	0.165792	5	2.54	Rhopaea_magnicornis_NC_013252	Rhopaea_magnicornis_NC_013252	double
3	NC_045215.1	Vespula flaviceps	Vespula_flaviceps_NC_045215_1	Insecta	Hymenoptera	Vespidae	Vespula	Arthropoda	F	H	17489	14726	-0.354	0.157985	39.3	41	13.6	6	80.3	19.6	47	-0.02	-0.385	0.02	0.385	Vespula_flaviceps_NC_045215_1	0.157985	5	4.115	Vespula_flaviceps_NC_045215	Vespula_flaviceps_NC_045215	double
3	NC_044714.1	Anthonomus rubi	Anthonomus_rubi_NC_044714_1	Insecta	Coleoptera	Curculionidae	Anthonomus	Arthropoda	F	H	17476	14309	-0.21	0.123827	39	35.5	15.3	10.2	74.5	25.5	45.7	0.046	-0.201	-0.046	0.201	Anthonomus_rubi_NC_044714_1	0.18122	5	2.962	Anthonomus_rubi_NC_044714	Anthonomus_rubi_NC_044714	double
3	NC_050933.1	Chrysomela vigintipunctata	Chrysomela_vigintipunctata_NC_050933_1	Insecta	Coleoptera	Chrysomelidae	Chrysomela	Arthropoda	F	H	17474	14469	-0.181	0.00869864	40.8	37.4	13.1	8.6	78.2	21.7	46	0.043	-0.204	-0.043	0.204	Chrysomela_vigintipunctata_NC_050933_1	0.17197	5	2.669	Chrysomela_vigintipunctata_NC_050933	Chrysomela_vigintipunctata_NC_050933	double
3	NC_060412.1	Scaphidium formosanum	Scaphidium_formosanum_NC_060412_1	Insecta	Coleoptera	Staphylinidae	Scaphidium	Arthropoda	F	H	17455	14531	-0.267	0.143168	39.9	36.3	15	8.5	76.2	23.5	44.8	0.046	-0.279	-0.046	0.279	Scaphidium_formosanum_NC_060412_1	0.167516	5	2.626	Scaphidium_formosanum_NC_060412	Scaphidium_formosanum_NC_060412	double
3	NC_053534.1	Crematogaster teranishii	Crematogaster_teranishii_NC_053534_1	Insecta	Hymenoptera	Formicidae	Crematogaster	Arthropoda	F	H	17442	14722	-0.403	0.153021	38.3	41.4	14.4	5.9	79.7	20.3	47.3	-0.038	-0.419	0.038	0.419	Crematogaster_teranishii_NC_053534_1	0.155945	5	4.196	Crematogaster_teranishii_NC_053534	Crematogaster_teranishii_NC_053534	double
3	NC_060713.1	Polygraphus poligraphus	Polygraphus_poligraphus_NC_060713_1	Insecta	Coleoptera	Curculionidae	Polygraphus	Arthropoda	F	H	17434	14567	-0.242	0.058449	37.4	32.5	17.9	12.3	69.9	30.2	44.8	0.07	-0.184	-0.07	0.184	Polygraphus_poligraphus_NC_060713_1	0.164449	5	3.053	Polygraphus_poligraphus_NC_060713	Polygraphus_poligraphus_NC_060713	double
3	NC_060873.1	Formica sinae	Formica_sinae_NC_060873_1	Insecta	Hymenoptera	Formicidae	Formica	Arthropoda	F	H	17432	15012	-0.297	0.137162	40.6	42.9	10.9	5.6	83.5	16.5	48.5	-0.029	-0.322	0.029	0.322	Formica_sinae_NC_060873_1	0.138825	5	4.073	Formica_sinae_NC_060873	Formica_sinae_NC_060873	double
3	NC_053900.1	Colobopsis nipponica	Colobopsis_nipponica_NC_053900_1	Insecta	Hymenoptera	Formicidae	Colobopsis	Arthropoda	F	H	17431	15077	-0.371	0.0470426	39.6	41	13.6	5.8	80.6	19.4	46.8	-0.018	-0.402	0.018	0.402	Colobopsis_nipponica_NC_053900_1	0.135047	5	4.255	Colobopsis_nipponica_NC_053900	Colobopsis_nipponica_NC_053900	double
3	NC_059868.1	Phrosinella nasuta	Phrosinella_nasuta_NC_059868_1	Insecta	Diptera	Sarcophagidae	Phrosinella	Arthropoda	F	H	17419	14699	-0.221	0.00809461	40.9	36.2	14.1	8.8	77.1	22.9	45	0.062	-0.232	-0.062	0.232	Phrosinella_nasuta_NC_059868_1	0.156151	5	2.529	Phrosinella_nasuta_NC_059868	Phrosinella_nasuta_NC_059868	double
3	NC_050888.1	Trigonopterus jasminae	Trigonopterus_jasminae_NC_050888_1	Insecta	Coleoptera	Curculionidae	Trigonopterus	Arthropoda	F	I	17417	14628	-0.312	0.160131	34.4	29.8	23	12.8	64.2	35.8	42.6	0.071	-0.288	-0.071	0.288	Trigonopterus_jasminae_NC_050888_1	0.160131	5	3.161	Trigonopterus_jasminae_NC_050888	Trigonopterus_jasminae_NC_050888	double
3	NC_036290.1	Hylastes attenuatus	Hylastes_attenuatus_NC_036290_1	Insecta	Coleoptera	Curculionidae	Hylastes	Arthropoda	F	H	17409	14530	-0.275	0.132345	38.9	34.9	16.3	9.8	73.8	26.1	44.7	0.054	-0.249	-0.054	0.249	Hylastes_attenuatus_NC_036290_1	0.165374	5	3.177	Hylastes_attenuatus_NC_036290	Hylastes_attenuatus_NC_036290	double
3	NC_045223.1	Lebbeus groenlandicus	Lebbeus_groenlandicus_NC_045223_1	Malacostraca	Decapoda	Hippolytidae	Lebbeus	Arthropoda	F	H	17399	14711	-0.232	0.154434	34.4	30.4	21.4	13.9	64.8	35.3	44.3	0.062	-0.213	-0.062	0.213	Lebbeus_groenlandicus_NC_045223_1	0.154492	5	2.48	Lebbeus_groenlandicus_NC_045223	Lebbeus_groenlandicus_NC_045223	double
3	NC_029727.1	Myzus persicae	Myzus_persicae_NC_029727_1	Insecta	Hemiptera	Aphididae	Myzus	Arthropoda	F	I	17382	14371	-0.253	0.0276148	46	38.1	10.3	5.6	84.1	15.9	43.7	0.094	-0.293	-0.094	0.293	Myzus_persicae_NC_029727_1	0.173225	5	3.929	Myzus_persicae_NC_029727	Myzus_persicae_NC_029727	double
3	NC_045306.1	Vulcanolepas fijiensis	Vulcanolepas_fijiensis_NC_045306_1	Hexanauplia	Pedunculata	Eolepadidae	Vulcanolepas	Arthropoda	F	L	17374	14557	-0.33	0.149937	38.3	31.2	20.8	9.6	69.5	30.4	40.8	0.102	-0.366	-0.102	0.366	Vulcanolepas_fijiensis_NC_045306_1	0.162139	5	2.644	Vulcanolepas_fijiensis_NC_045306	Vulcanolepas_fijiensis_NC_045306	double
3	NC_057545.1	Mystonectes coelamboides	Mystonectes_coelamboides_NC_057545_1	Insecta	Coleoptera	Dytiscidae	Mystonectes	Arthropoda	F	H	17373	14724	-0.218	0.122259	40.4	36.6	13.9	9.1	77	23	45.7	0.049	-0.206	-0.049	0.206	Mystonectes_coelamboides_NC_057545_1	0.152478	5	2.414	Mystonectes_coelamboides_NC_057545	Mystonectes_coelamboides_NC_057545	double
3	NC_039171.1	Benthonectes filipes	Benthonectes_filipes_NC_039171_1	Malacostraca	Decapoda	Benthesicymidae	Benthonectes	Arthropoda	F	I	17361	15229	-0.196	0.122631	30.2	31.3	22.7	15.8	61.5	38.5	47.1	-0.017	-0.18	0.017	0.18	Benthonectes_filipes_NC_039171_1	0.122804	5	2.405	Benthonectes_filipes_NC_039171	Benthonectes_filipes_NC_039171	double
3	NC_048525.1	Greenidea ficicola	Greenidea_ficicola_NC_048525_1	Insecta	Hemiptera	Aphididae	Greenidea	Arthropoda	F	I	17361	14421	-0.247	0.109729	46.9	38.8	9	5.3	85.7	14.3	44.1	0.094	-0.258	-0.094	0.258	Greenidea_ficicola_NC_048525_1	0.169345	5	3.973	Greenidea_ficicola_NC_048525	Greenidea_ficicola_NC_048525	double
5	NC_024441.1	Engaeus sericatus	Engaeus_sericatus_NC_024441_1	Malacostraca	Decapoda	Parastacidae	Engaeus	Arthropoda	F	H	17350	14731	-0.369	0.150951	34.3	32.5	22.8	10.4	66.8	33.2	42.9	0.026	-0.374	-0.026	0.374	Engaeus_sericatus_NC_024441_1	0.150951	5	2.787	Engaeus_sericatus_NC_024441	Engaeus_sericatus_NC_024441	double
5	NC_059714.1	Oplophorus spinosus	Oplophorus_spinosus_NC_059714_1	Malacostraca	Decapoda	Oplophoridae	Oplophorus	Arthropoda	F	H	17346	14671	-0.34	0.154214	34.3	31.3	23.1	11.3	65.6	34.4	42.6	0.047	-0.344	-0.047	0.344	Oplophorus_spinosus_NC_059714_1	0.154214	5	2.465	Oplophorus_spinosus_NC_059714	Oplophorus_spinosus_NC_059714	double
5	NC_025647.1	Tenuibranchiurus glypticus	Tenuibranchiurus_glypticus_NC_025647_1	Malacostraca	Decapoda	Parastacidae	Tenuibranchiurus	Arthropoda	F	H	17342	14692	-0.402	0.151021	33.6	30.6	25.7	10.1	64.2	35.8	40.7	0.047	-0.435	-0.047	0.435	Tenuibranchiurus_glypticus_NC_025647_1	0.152808	5	2.844	Tenuibranchiurus_glypticus_NC_025647	Tenuibranchiurus_glypticus_NC_025647	double
3	NC_029224.1	Blaptica dubia	Blaptica_dubia_NC_029224_1	Insecta	Blattodea	Blaberidae	Blaptica	Arthropoda	F	H	17340	14716	-0.25	0.0148789	38.9	33.8	17.4	9.9	72.7	27.3	43.7	0.07	-0.276	-0.07	0.276	Blaptica_dubia_NC_029224_1	0.151326	5	2.528	Blaptica_dubia_NC_029224	Blaptica_dubia_NC_029224	double
3	NC_057261.1	Pygoluciola qingyu	Pygoluciola_qingyu_NC_057261_1	Insecta	Coleoptera	Lampyridae	Pygoluciola	Arthropoda	F	H	17332	14526	-0.165	0.00501962	45.6	34.8	11.7	8	80.4	19.7	42.8	0.134	-0.189	-0.134	0.189	Pygoluciola_qingyu_NC_057261_1	0.161897	5	2.717	Pygoluciola_qingyu_NC_057261	Pygoluciola_qingyu_NC_057261	double
3	NC_051548.1	Aclees cribratus	Aclees_cribratus_NC_051548_1	Insecta	Coleoptera	Curculionidae	Aclees	Arthropoda	F	I	17329	14591	-0.267	0.0323735	39.5	36.3	15.1	9.1	75.8	24.2	45.4	0.042	-0.247	-0.042	0.247	Aclees_cribratus_NC_051548_1	0.158001	5	2.864	Aclees_cribratus_NC_051548	Aclees_cribratus_NC_051548	double
3	NC_042881.1	Triatoma migrans	Triatoma_migrans_NC_042881_1	Insecta	Hemiptera	Reduviidae	Triatoma	Arthropoda	MP	H	17323	14497	-0.234	0.0338856	41	30.1	18.2	10.8	71.1	29	40.9	0.153	-0.255	-0.153	0.255	Triatoma_migrans_NC_042881_1	0.163136	5	2.982	Triatoma_migrans_NC_042881	Triatoma_migrans_NC_042881	double
5	NC_024442.1	Engaeus quadrimanus	Engaeus_quadrimanus_NC_024442_1	Malacostraca	Decapoda	Parastacidae	Engaeus	Arthropoda	F	H	17321	14728	-0.375	0.149645	34.6	32	23.2	10.3	66.6	33.5	42.3	0.039	-0.385	-0.039	0.385	Engaeus_quadrimanus_NC_024442_1	0.149703	5	2.783	Engaeus_quadrimanus_NC_024442	Engaeus_quadrimanus_NC_024442	double
3	NC_036288.1	Pityophthorus pubescens	Pityophthorus_pubescens_NC_036288_1	Insecta	Coleoptera	Curculionidae	Pityophthorus	Arthropoda	F	H	17316	14431	-0.279	0.133922	41.8	31.1	17.1	10	72.9	27.1	41.1	0.147	-0.263	-0.147	0.263	Pityophthorus_pubescens_NC_036288_1	0.166609	5	3.055	Pityophthorus_pubescens_NC_036288	Pityophthorus_pubescens_NC_036288	double
3	NC_059866.1	Megalinus hunanensis	Megalinus_hunanensis_NC_059866_1	Insecta	Coleoptera	Staphylinidae	Megalinus	Arthropoda	F	H	17314	14602	-0.169	0.0116091	40.1	39.2	12.3	8.4	79.3	20.7	47.6	0.012	-0.189	-0.012	0.189	Megalinus_hunanensis_NC_059866_1	0.156636	5	2.433	Megalinus_hunanensis_NC_059866	Megalinus_hunanensis_NC_059866	double
3	NC_059894.1	Chlorops oryzae	Chlorops_oryzae_NC_059894_1	Insecta	Diptera	Chloropidae	Chlorops	Arthropoda	F	H	17313	14697	-0.198	0.0148443	42	37.1	12.5	8.3	79.1	20.8	45.4	0.062	-0.204	-0.062	0.204	Chlorops_oryzae_NC_059894_1	0.1511	5	2.503	Chlorops_oryzae_NC_059894	Chlorops_oryzae_NC_059894	double
3	NC_046898.1	Myrmus lateralis	Myrmus_lateralis_NC_046898_1	Insecta	Hemiptera	Rhopalidae	Myrmus	Arthropoda	F	H	17309	14669	-0.146	0.00306199	41.4	34.4	14.1	10.1	75.8	24.2	44.5	0.091	-0.164	-0.091	0.164	Myrmus_lateralis_NC_046898_1	0.152522	5	2.922	Myrmus_lateralis_NC_046898	Myrmus_lateralis_NC_046898	double
3	NC_035547.1	Triatoma infestans	Triatoma_infestans_NC_035547_1	Insecta	Hemiptera	Reduviidae	Triatoma	Arthropoda	MP	H	17301	14527	-0.272	0.00699381	41.1	27.6	20.2	11.1	68.7	31.3	38.7	0.198	-0.289	-0.198	0.289	Triatoma_infestans_NC_035547_1	0.160338	5	2.805	Triatoma_infestans_NC_035547	Triatoma_infestans_NC_035547	double
3	NC_059900.1	Nicrophorus nepalensis	Nicrophorus_nepalensis_NC_059900_1	Insecta	Coleoptera	Silphidae	Nicrophorus	Arthropoda	F	H	17299	14568	-0.145	0.00219666	39.5	37.2	13.5	9.7	76.7	23.2	46.9	0.03	-0.165	-0.03	0.165	Nicrophorus_nepalensis_NC_059900_1	0.15787	5	2.569	Nicrophorus_nepalensis_NC_059900	Nicrophorus_nepalensis_NC_059900	double
3	NC_051549.1	Coenomyia ferruginea	Coenomyia_ferruginea_NC_051549_1	Insecta	Diptera	Xylophagaidae	Coenomyia	Arthropoda	F	H	17283	14724	-0.214	0.00717468	41.4	34	15.1	9.5	75.4	24.6	43.5	0.099	-0.227	-0.099	0.227	Coenomyia_ferruginea_NC_051549_1	0.148065	5	2.313	Coenomyia_ferruginea_NC_051549	Coenomyia_ferruginea_NC_051549	double
3	NC_028602.1	Liogluta microptera	Liogluta_microptera_NC_028602_1	Insecta	Coleoptera	Staphylinidae	Liogluta	Arthropoda	F	H	17281	14585	-0.171	0.00665471	40.2	38.6	12.6	8.6	78.8	21.2	47.2	0.019	-0.187	-0.019	0.187	Liogluta_microptera_NC_028602_1	0.156009	5	2.488	Liogluta_microptera_NC_028602	Liogluta_microptera_NC_028602	double
3	NC_028604.1	Myrmecocephalus concinnus	Myrmecocephalus_concinnus_NC_028604_1	Insecta	Coleoptera	Staphylinidae	Myrmecocephalus	Arthropoda	F	H	17278	14515	-0.171	0.159914	39.2	41.1	11.9	7.8	80.3	19.7	48.9	-0.024	-0.206	0.024	0.206	Myrmecocephalus_concinnus_NC_028604_1	0.159914	5	2.583	Myrmecocephalus_concinnus_NC_028604	Myrmecocephalus_concinnus_NC_028604	double
4	NC_045247.1	Gastrophysa polygoni	Gastrophysa_polygoni_NC_045247_1	Insecta	Coleoptera	Chrysomelidae	Gastrophysa	Arthropoda	F	H	17277	14822	-0.173	0.00179429	40.7	39.3	12	8	80	20	47.3	0.017	-0.202	-0.017	0.202	Gastrophysa_polygoni_NC_045247_1	0.142096	5	2.743	Gastrophysa_polygoni_NC_045247	Gastrophysa_polygoni_NC_045247	double
5	NC_025289.1	Orthogonalys pulchella	Orthogonalys_pulchella_NC_025289_1	Insecta	Hymenoptera	Trigonalidae	Orthogonalys	Arthropoda	F	H	17277	14690	0.204	0.0487932	39.1	44.7	6.4	9.8	83.8	16.2	54.5	-0.066	0.21	0.066	-0.21	Orthogonalys_pulchella_NC_025289_1	0.149737	5	4.283	Orthogonalys_pulchella_NC_025289	Orthogonalys_pulchella_NC_025289	double
3	NC_044711.1	Anthonomus eugenii	Anthonomus_eugenii_NC_044711_1	Insecta	Coleoptera	Curculionidae	Anthonomus	Arthropoda	F	H	17257	14538	-0.196	0.112824	38.2	34.3	16.4	11.1	72.5	27.5	45.4	0.054	-0.19	-0.054	0.19	Anthonomus_eugenii_NC_044711_1	0.157559	5	2.971	Anthonomus_eugenii_NC_044711	Anthonomus_eugenii_NC_044711	double
3	NC_042435.1	Melamphaus faber	Melamphaus_faber_NC_042435_1	Insecta	Hemiptera	Pyrrhocoridae	Melamphaus	Arthropoda	F	H	17250	14513	-0.195	0.025913	42.4	33.2	14.1	10.3	75.6	24.4	43.5	0.121	-0.156	-0.121	0.156	Melamphaus_faber_NC_042435_1	0.158667	5	3.111	Melamphaus_faber_NC_042435	Melamphaus_faber_NC_042435	double
3	NC_023246.1	Cheirotonus jansoni	Cheirotonus_jansoni_NC_023246_1	Insecta	Coleoptera	Scarabaeidae	Cheirotonus	Arthropoda	F	H	17249	14614	-0.332	0.00260885	36.8	28.8	23	11.3	65.6	34.3	40.1	0.121	-0.341	-0.121	0.341	Cheirotonus_jansoni_NC_023246_1	0.152762	5	2.585	Cheirotonus_jansoni_NC_023246	Cheirotonus_jansoni_NC_023246	double
3	NC_045179.1	Bombus terrestris terrestris	Bombus_terrestris_terrestris_NC_045179_1	Insecta	Hymenoptera	Apidae	Bombus	Arthropoda	F	H	17232	14556	-0.307	0.147284	42.8	42.2	9.3	4.7	85	14	46.9	0.007	-0.329	-0.007	0.329	Bombus_terrestris_terrestris_NC_045179_1	0.155292	5	4.692	Bombus_terrestris_terrestris_NC_045179	Bombus_terrestris_terrestris_NC_045179	double
4	NC_046039.1	Macrophthalmus pacificus	Macrophthalmus_pacificus_NC_046039_1	Malacostraca	Decapoda	Macrophthalmidae	Macrophthalmus	Arthropoda	F	H	17226	14692	-0.346	0.146929	34.2	33.3	21.9	10.6	67.5	32.5	43.9	0.012	-0.347	-0.012	0.347	Macrophthalmus_pacificus_NC_046039_1	0.147103	5	2.78	Macrophthalmus_pacificus_NC_046039	Macrophthalmus_pacificus_NC_046039	double
3	NC_036273.1	Silvanus bidentatus	Silvanus_bidentatus_NC_036273_1	Insecta	Coleoptera	Silvanidae	Silvanus	Arthropoda	F	H	17220	14403	-0.191	0.130952	39	40.3	12.5	8.1	79.3	20.6	48.4	-0.017	-0.212	0.017	0.212	Silvanus_bidentatus_NC_036273_1	0.163589	5	2.602	Silvanus_bidentatus_NC_036273	Silvanus_bidentatus_NC_036273	double
4	NC_060556.1	Somanniathelphusa hainanensis	Somanniathelphusa_hainanensis_NC_060556_1	Malacostraca	Decapoda	Parathelphusidae	Somanniathelphusa	Arthropoda	F	H	17212	14725	-0.332	0.141471	35	37.1	18.9	9	72.1	27.9	46.1	-0.028	-0.354	0.028	0.354	Somanniathelphusa_hainanensis_NC_060556_1	0.144492	5	2.742	Somanniathelphusa_hainanensis_NC_060556	Somanniathelphusa_hainanensis_NC_060556	double
6	NC_026832.1	Ibalia leucospoides	Ibalia_leucospoides_NC_026832_1	Insecta	Hymenoptera	Ibaliidae	Ibalia	Arthropoda	F	H	17212	14953	-0.009	0.0819777	41.8	44.5	6.9	6.8	86.3	13.7	51.3	-0.032	-0.012	0.032	0.012	Ibalia_leucospoides_NC_026832_1	0.131246	5	4.174	Ibalia_leucospoides_NC_026832	Ibalia_leucospoides_NC_026832	double
4	NC_060557.1	Somanniathelphusa yangshanensis	Somanniathelphusa_yangshanensis_NC_060557_1	Malacostraca	Decapoda	Parathelphusidae	Somanniathelphusa	Arthropoda	F	H	17206	14720	-0.325	0.1403	35.3	37.3	18.5	9	72.6	27.5	46.3	-0.028	-0.347	0.028	0.347	Somanniathelphusa_yangshanensis_NC_060557_1	0.144484	5	2.749	Somanniathelphusa_yangshanensis_NC_060557	Somanniathelphusa_yangshanensis_NC_060557	double
3	NC_060872.1	Cataglyphis aenescens	Cataglyphis_aenescens_NC_060872_1	Insecta	Hymenoptera	Formicidae	Cataglyphis	Arthropoda	F	H	17197	14945	-0.308	0.129499	38.8	43	12.2	6.1	81.8	18.3	49.1	-0.051	-0.331	0.051	0.331	Cataglyphis_aenescens_NC_060872_1	0.130953	5	4.119	Cataglyphis_aenescens_NC_060872	Cataglyphis_aenescens_NC_060872	double
3	NC_012462.1	Riptortus pedestris	Riptortus_pedestris_NC_012462_1	Insecta	Hemiptera	Alydidae	Riptortus	Arthropoda	F	H	17191	14513	-0.165	0.0161713	41.9	34.7	14	9.4	76.6	23.4	44.1	0.093	-0.193	-0.093	0.193	Riptortus_pedestris_NC_012462_1	0.155779	5	2.911	Riptortus_pedestris_NC_012462	Riptortus_pedestris_NC_012462	double
3	NC_042380.1	Hystrichopsylla weida qinlingensis	Hystrichopsylla_weida_qinlingensis_NC_042380_1	Insecta	Siphonaptera	Hystrichopsyllidae	Hystrichopsylla	Arthropoda	EctoP	H	17173	14527	-0.208	0.012869	39.1	41.5	11.8	7.6	80.6	19.4	49.1	-0.03	-0.221	0.03	0.221	Hystrichopsylla_weida_qinlingensis_NC_042380_1	0.154079	5	2.531	Hystrichopsylla_weida_qinlingensis_NC_042380	Hystrichopsylla_weida_qinlingensis_NC_042380	double
4	NC_060555.1	Esanthelphusa keyini (nom. nud.)	Esanthelphusa_keyini__nom__nud___NC_060555_1	Malacostraca	Decapoda	Gecarcinucidae	Esanthelphusa	Arthropoda	F	H	17172	14714	-0.33	0.137549	34.9	37.5	18.6	9	72.4	27.6	46.5	-0.035	-0.349	0.035	0.349	Esanthelphusa_keyini__nom__nud___NC_060555_1	0.14314	5	2.768	Esanthelphusa_keyini__nom__nud___NC_060555	Esanthelphusa_keyini__nom__nud___NC_060555	double
3	NC_044760.1	Pterostichus niger	Pterostichus_niger_NC_044760_1	Insecta	Coleoptera	Carabidae	Pterostichus	Arthropoda	F	H	17162	14710	-0.176	0.00804102	42.2	38.8	11.3	7.7	81	19	46.5	0.042	-0.188	-0.042	0.188	Pterostichus_niger_NC_044760_1	0.142874	5	2.414	Pterostichus_niger_NC_044760	Pterostichus_niger_NC_044760	double
3	NC_046580.1	Cylas formicarius	Cylas_formicarius_NC_046580_1	Insecta	Coleoptera	Brentidae	Cylas	Arthropoda	F	H	17150	14593	-0.241	0.0723032	39.3	39.1	13.2	8.4	78.4	21.6	47.5	0.002	-0.221	-0.002	0.221	Cylas_formicarius_NC_046580_1	0.0723032	5	3.366	Cylas_formicarius_NC_046580	Cylas_formicarius_NC_046580	double
3	NC_053650.1	Neurigona zhejiangensis	Neurigona_zhejiangensis_NC_053650_1	Insecta	Diptera	Dolichopodidae	Neurigona	Arthropoda	F	H	17141	14727	-0.218	0.00577563	41.4	35.9	14	8.7	77.3	22.7	44.6	0.07	-0.234	-0.07	0.234	Neurigona_zhejiangensis_NC_053650_1	0.140832	5	2.41	Neurigona_zhejiangensis_NC_053650	Neurigona_zhejiangensis_NC_053650	double
3	NC_036067.1	Dolichovespula panda	Dolichovespula_panda_NC_036067_1	Insecta	Hymenoptera	Vespidae	Dolichovespula	Arthropoda	F	H	17137	14839	-0.268	0.0999008	42.8	41.8	10	5.4	84.6	15.4	47.2	0.012	-0.3	-0.012	0.3	Dolichovespula_panda_NC_036067_1	0.134096	5	4.164	Dolichovespula_panda_NC_036067	Dolichovespula_panda_NC_036067	double
3	NC_051968.1	Chinapotamon maolanense	Chinapotamon_maolanense_NC_051968_1	Malacostraca	Decapoda	Potamidae	Chinapotamon	Arthropoda	F	H	17130	14687	-0.299	0.142382	35.7	37.7	17.6	9	73.4	26.6	46.7	-0.026	-0.324	0.026	0.324	Chinapotamon_maolanense_NC_051968_1	0.142615	5	2.768	Chinapotamon_maolanense_NC_051968	Chinapotamon_maolanense_NC_051968	double
4	NC_036947.1	Sinopotamon yaanense	Sinopotamon_yaanense_NC_036947_1	Malacostraca	Decapoda	Potamidae	Sinopotamon	Arthropoda	F	H	17126	14730	-0.296	0.133306	35.8	37.7	17.6	9	73.5	26.6	46.7	-0.026	-0.323	0.026	0.323	Sinopotamon_yaanense_NC_036947_1	0.139904	5	2.804	Sinopotamon_yaanense_NC_036947	Sinopotamon_yaanense_NC_036947	double
3	NC_014688.1	Megacrania alpheus adan	Megacrania_alpheus_adan_NC_014688_1	Insecta	Phasmatodea	Phasmatidae	Megacrania	Arthropoda	F	H	17124	14585	-0.232	0.00110955	46.2	30.6	13.9	9.3	76.8	23.2	39.9	0.203	-0.199	-0.203	0.199	Megacrania_alpheus_adan_NC_014688_1	0.148271	5	2.853	Megacrania_alpheus_adan_NC_014688	Megacrania_alpheus_adan_NC_014688	double
3	NC_053351.1	Sipalinus gigas	Sipalinus_gigas_NC_053351_1	Insecta	Coleoptera	Curculionidae	Sipalinus	Arthropoda	F	H	17120	14599	-0.263	0.122488	36.5	29.9	21.3	12.3	66.4	33.6	42.2	0.1	-0.265	-0.1	0.265	Sipalinus_gigas_NC_053351_1	0.147255	5	2.824	Sipalinus_gigas_NC_053351	Sipalinus_gigas_NC_053351	double
3	NC_026309.1	Brachyuropus grewingkii	Brachyuropus_grewingkii_NC_026309_1	Malacostraca	Amphipoda	Acanthogammaridae	Brachyuropus	Arthropoda	F	I	17118	13936	-0.292	0.185886	31.2	31	24.7	13.1	62.2	37.8	44.1	0.003	-0.307	-0.003	0.307	Brachyuropus_grewingkii_NC_026309_1	0.185886	5	3.433	Brachyuropus_grewingkii_NC_026309	Brachyuropus_grewingkii_NC_026309	double
2	NC_053790.1	Stomaphis sinisalicis	Stomaphis_sinisalicis_NC_053790_1	Insecta	Hemiptera	Aphididae	Stomaphis	Arthropoda	F	I	17109	14448	-0.302	0.155474	44.3	40.5	9.9	5.3	84.8	15.2	45.8	0.044	-0.305	-0.044	0.305	Stomaphis_sinisalicis_NC_053790_1	0.155532	5	3.959	Stomaphis_sinisalicis_NC_053790	Stomaphis_sinisalicis_NC_053790	double
3	NC_057547.1	Nectoporus subrotundus	Nectoporus_subrotundus_NC_057547_1	Insecta	Coleoptera	Dytiscidae	Nectoporus	Arthropoda	F	H	17106	14727	-0.251	0.108266	39.2	35.3	15.7	9.8	74.5	25.5	45.1	0.052	-0.232	-0.052	0.232	Nectoporus_subrotundus_NC_057547_1	0.139074	5	2.421	Nectoporus_subrotundus_NC_057547	Nectoporus_subrotundus_NC_057547	double
3	NC_046833.1	Enoplops potanini	Enoplops_potanini_NC_046833_1	Insecta	Hemiptera	Coreidae	Enoplops	Arthropoda	F	H	17101	14489	-0.169	0.0014619	41.9	33	15.1	10	74.9	25.1	43	0.118	-0.202	-0.118	0.202	Enoplops_potanini_NC_046833_1	0.15274	5	2.961	Enoplops_potanini_NC_046833	Enoplops_potanini_NC_046833	double
5	NC_057304.1	Pagurus similis	Pagurus_similis_NC_057304_1	Malacostraca	Decapoda	Paguridae	Pagurus	Arthropoda	F	I	17100	14873	-0.189	0.0688304	36.7	36.4	16.1	10.9	73.1	27	47.3	0.004	-0.195	-0.004	0.195	Pagurus_similis_NC_057304_1	0.130234	5	2.603	Pagurus_similis_NC_057304	Pagurus_similis_NC_057304	double
3	NC_044712.1	Anthonomus pomorum	Anthonomus_pomorum_NC_044712_1	Insecta	Coleoptera	Curculionidae	Anthonomus	Arthropoda	F	H	17093	14547	-0.18	0.09226	38.3	35.4	15.5	10.8	73.7	26.3	46.2	0.04	-0.178	-0.04	0.178	Anthonomus_pomorum_NC_044712_1	0.14895	5	2.945	Anthonomus_pomorum_NC_044712	Anthonomus_pomorum_NC_044712	double
3	NC_036272.1	Anatis ocellata	Anatis_ocellata_NC_036272_1	Insecta	Coleoptera	Coccinellidae	Anatis	Arthropoda	F	H	17092	14301	-0.156	0.156213	41.4	37.9	11.9	8.8	79.3	20.7	46.7	0.044	-0.151	-0.044	0.151	Anatis_ocellata_NC_036272_1	0.163293	5	2.92	Anatis_ocellata_NC_036272	Anatis_ocellata_NC_036272	double
3	NC_035756.1	Reduvius tenebrosus	Reduvius_tenebrosus_NC_035756_1	Insecta	Hemiptera	Reduviidae	Reduvius	Arthropoda	F	H	17090	14529	-0.232	0.0922177	39.7	27.5	20.4	12.5	67.2	32.9	40	0.182	-0.24	-0.182	0.24	Reduvius_tenebrosus_NC_035756_1	0.149854	5	2.942	Reduvius_tenebrosus_NC_035756	Reduvius_tenebrosus_NC_035756	double
3	NC_028606.1	Oxypoda acuminata	Oxypoda_acuminata_NC_028606_1	Insecta	Coleoptera	Staphylinidae	Oxypoda	Arthropoda	F	H	17075	14518	-0.183	0.0130015	40.2	38.2	13	8.6	78.4	21.6	46.8	0.025	-0.204	-0.025	0.204	Oxypoda_acuminata_NC_028606_1	0.149751	5	2.445	Oxypoda_acuminata_NC_028606	Oxypoda_acuminata_NC_028606	double
3	NC_042198.1	Callispa bowringii	Callispa_bowringii_NC_042198_1	Insecta	Coleoptera	Chrysomelidae	Callispa	Arthropoda	F	H	17060	14155	-0.194	0.0386284	40.9	34.7	14.8	9.6	75.6	24.4	44.3	0.082	-0.211	-0.082	0.211	Callispa_bowringii_NC_042198_1	0.170281	5	2.912	Callispa_bowringii_NC_042198	Callispa_bowringii_NC_042198	double
3	NC_041172.1	Henosepilachna vigintioctopunctata	Henosepilachna_vigintioctopunctata_NC_041172_1	Insecta	Coleoptera	Coccinellidae	Henosepilachna	Arthropoda	F	H	17057	14477	-0.185	0.00363487	40.5	38.7	12.5	8.3	79.2	20.8	47	0.022	-0.203	-0.022	0.203	Henosepilachna_vigintioctopunctata_NC_041172_1	0.151258	5	2.968	Henosepilachna_vigintioctopunctata_NC_041172	Henosepilachna_vigintioctopunctata_NC_041172	double
3	NC_036287.1	Dryocoetes autographus	Dryocoetes_autographus_NC_036287_1	Insecta	Coleoptera	Curculionidae	Dryocoetes	Arthropoda	F	H	17055	14310	-0.238	0.122076	39.2	35.5	15.5	9.8	74.7	25.3	45.3	0.05	-0.224	-0.05	0.224	Dryocoetes_autographus_NC_036287_1	0.16095	5	3.04	Dryocoetes_autographus_NC_036287	Dryocoetes_autographus_NC_036287	double
3	NC_057470.1	Phloeosinus perlatus	Phloeosinus_perlatus_NC_057470_1	Insecta	Coleoptera	Curculionidae	Phloeosinus	Arthropoda	F	H	17054	14265	0.254	0.163539	30	40.3	11.3	18.4	70.3	29.7	58.7	-0.147	0.242	0.147	-0.242	Phloeosinus_perlatus_NC_057470_1	0.163539	5	3.085	Phloeosinus_perlatus_NC_057470	Phloeosinus_perlatus_NC_057470	double
3	NC_045178.1	Bombus terrestris lusitanicus	Bombus_terrestris_lusitanicus_NC_045178_1	Insecta	Hymenoptera	Apidae	Bombus	Arthropoda	F	H	17049	14610	-0.306	0.134964	43.1	42.5	9.3	4.7	85.6	14	47.2	0.007	-0.328	-0.007	0.328	Bombus_terrestris_lusitanicus_NC_045178_1	0.143058	5	4.692	Bombus_terrestris_lusitanicus_NC_045178	Bombus_terrestris_lusitanicus_NC_045178	double
3	NC_036285.1	Trypophloeus asperatus	Trypophloeus_asperatus_NC_036285_1	Insecta	Coleoptera	Curculionidae	Trypophloeus	Arthropoda	F	H	17039	14244	-0.249	0.133048	39.6	32.6	16.8	10.9	72.2	27.7	43.5	0.096	-0.216	-0.096	0.216	Trypophloeus_asperatus_NC_036285_1	0.164035	5	3.127	Trypophloeus_asperatus_NC_036285	Trypophloeus_asperatus_NC_036285	double
4	NC_032044.1	Somanniathelphusa boyangensis	Somanniathelphusa_boyangensis_NC_032044_1	Malacostraca	Decapoda	Parathelphusidae	Somanniathelphusa	Arthropoda	F	H	17032	14719	-0.313	0.131458	35.1	37.2	18.4	9.2	72.3	27.6	46.4	-0.029	-0.33	0.029	0.33	Somanniathelphusa_boyangensis_NC_032044_1	0.135803	5	2.746	Somanniathelphusa_boyangensis_NC_032044	Somanniathelphusa_boyangensis_NC_032044	double
3	NC_022710.1	Jellisonia amadoi	Jellisonia_amadoi_NC_022710_1	Insecta	Siphonaptera	Ceratophyllidae	Jellisonia	Arthropoda	EctoP	H	17031	14607	-0.243	0.0049909	38.8	40.4	12.9	7.6	79.2	20.5	48	-0.02	-0.26	0.02	0.26	Jellisonia_amadoi_NC_022710_1	0.142329	5	2.632	Jellisonia_amadoi_NC_022710	Jellisonia_amadoi_NC_022710	double
3	NC_052886.1	Ochthebius puncticollis	Ochthebius_puncticollis_NC_052886_1	Insecta	Coleoptera	Hydraenidae	Ochthebius	Arthropoda	F	I	17027	14553	-0.132	0.0278969	41.5	38.2	11.5	8.7	79.7	20.2	46.9	0.042	-0.138	-0.042	0.138	Ochthebius_puncticollis_NC_052886_1	0.145299	5	2.47	Ochthebius_puncticollis_NC_052886	Ochthebius_puncticollis_NC_052886	double
3	NC_021975.1	Lygus lineolaris	Lygus_lineolaris_NC_021975_1	Insecta	Hemiptera	Miridae	Lygus	Arthropoda	F	H	17027	14579	-0.182	0.00763493	43	33.1	14.2	9.8	76.1	24	42.9	0.13	-0.181	-0.13	0.181	Lygus_lineolaris_NC_021975_1	0.143772	5	2.864	Lygus_lineolaris_NC_021975	Lygus_lineolaris_NC_021975	double
3	NC_037195.1	Hydrotaea ignava	Hydrotaea_ignava_NC_037195_1	Insecta	Diptera	Muscidae	Hydrotaea	Arthropoda	F	H	17026	13158	-0.171	0.13685	40.8	39.9	11.2	8.2	80.7	19.4	48.1	0.011	-0.151	-0.011	0.151	Hydrotaea_ignava_NC_037195_1	0.140961	5	2.423	Hydrotaea_ignava_NC_037195	Hydrotaea_ignava_NC_037195	double
3	NC_046688.1	Streptocephalus cafer	Streptocephalus_cafer_NC_046688_1	Branchiopoda	Anostraca	Streptocephalidae	Streptocephalus	Arthropoda	F	H	17020	13945	-0.063	0.0118684	35.3	32.8	16.4	15.4	68.1	31.8	48.2	0.038	-0.033	-0.038	0.033	Streptocephalus_cafer_NC_046688_1	0.18067	5	2.971	Streptocephalus_cafer_NC_046688	Streptocephalus_cafer_NC_046688	double
3	NC_060290.1	Gibbium aequinoctiale	Gibbium_aequinoctiale_NC_060290_1	Insecta	Coleoptera	Ptinidae	Gibbium	Arthropoda	F	I	17020	14499	-0.308	0.00182139	41.9	30.9	18	9.2	72.8	27.2	40.1	0.151	-0.321	-0.151	0.321	Gibbium_aequinoctiale_NC_060290_1	0.14812	5	2.692	Gibbium_aequinoctiale_NC_060290	Gibbium_aequinoctiale_NC_060290	double
3	NC_002609.1	Triatoma dimidiata	Triatoma_dimidiata_NC_002609_1	Insecta	Hemiptera	Reduviidae	Triatoma	Arthropoda	MP	H	17019	14529	-0.259	0.0190963	40.6	28.9	19.2	11.2	69.5	30.4	40.1	0.168	-0.265	-0.168	0.265	Triatoma_dimidiata_NC_002609_1	0.146307	5	2.864	Triatoma_dimidiata_NC_002609	Triatoma_dimidiata_NC_002609	double
3	NC_044742.1	Panorpa debilis	Panorpa_debilis_NC_044742_1	Insecta	Mecoptera	Panorpidae	Panorpa	Arthropoda	F	H	17018	14738	-0.146	0.00452462	38.3	38.6	13.3	9.7	76.9	23	48.3	-0.003	-0.158	0.003	0.158	Panorpa_debilis_NC_044742_1	0.133976	5	2.414	Panorpa_debilis_NC_044742	Panorpa_debilis_NC_044742	double
4	NC_037608.1	Gasteruption parvicollarium	Gasteruption_parvicollarium_NC_037608_1	Insecta	Hymenoptera	Gasteruptiidae	Gasteruption	Arthropoda	F	H	17009	15312	-0.323	0.0851902	44.7	39.1	10.7	5.5	83.8	16.2	44.6	0.066	-0.319	-0.066	0.319	Gasteruption_parvicollarium_NC_037608_1	0.0997707	5	3.857	Gasteruption_parvicollarium_NC_037608	Gasteruption_parvicollarium_NC_037608	double
3	NC_056369.1	Coelioxys fenestrata	Coelioxys_fenestrata_NC_056369_1	Insecta	Hymenoptera	Megachilidae	Coelioxys	Arthropoda	F	H	17004	14599	-0.309	0.0396377	42.1	40.8	11.3	5.9	82.9	17.2	46.7	0.015	-0.317	-0.015	0.317	Coelioxys_fenestrata_NC_056369_1	0.141437	5	4.472	Coelioxys_fenestrata_NC_056369	Coelioxys_fenestrata_NC_056369	double
3	NC_014491.1	Physemacris variolosa	Physemacris_variolosa_NC_014491_1	Insecta	Orthoptera	Pneumoridae	Physemacris	Arthropoda	F	H	17004	14646	-0.237	0.00476358	43.7	31.8	15.3	9.3	75.5	24.6	41.1	0.158	-0.245	-0.158	0.245	Physemacris_variolosa_NC_014491_1	0.138673	5	2.897	Physemacris_variolosa_NC_014491	Physemacris_variolosa_NC_014491	double
3	NC_041237.1	Sitona obsoletus	Sitona_obsoletus_NC_041237_1	Insecta	Coleoptera	Curculionidae	Sitona	Arthropoda	F	H	17003	14656	-0.179	0.0269952	40	35.8	14.2	9.9	75.8	24.1	45.7	0.055	-0.179	-0.055	0.179	Sitona_obsoletus_NC_041237_1	0.138034	5	2.836	Sitona_obsoletus_NC_041237	Sitona_obsoletus_NC_041237	double
3	NC_034283.1	Hierodula patellifera	Hierodula_patellifera_NC_034283_1	Insecta	Mantodea	Mantidae	Hierodula	Arthropoda	F	H	16999	14706	-0.245	0.0952997	39.1	35.3	15.8	9.7	74.4	25.5	45	0.052	-0.239	-0.052	0.239	Hierodula_patellifera_NC_034283_1	0.13489	5	2.667	Hierodula_patellifera_NC_034283	Hierodula_patellifera_NC_034283	double
3	NC_050887.1	Trigonopterus tanimbarensis	Trigonopterus_tanimbarensis_NC_050887_1	Insecta	Coleoptera	Curculionidae	Trigonopterus	Arthropoda	F	I	16993	14651	-0.299	0.137821	38.6	31.1	19.5	10.8	69.7	30.3	41.9	0.107	-0.29	-0.107	0.29	Trigonopterus_tanimbarensis_NC_050887_1	0.137821	5	3.197	Trigonopterus_tanimbarensis_NC_050887	Trigonopterus_tanimbarensis_NC_050887	double
3	NC_036286.1	Trypodendron domesticum	Trypodendron_domesticum_NC_036286_1	Insecta	Coleoptera	Curculionidae	Trypodendron	Arthropoda	F	H	16986	14519	-0.265	0.106558	41.6	35.8	14.4	8.2	77.4	22.6	44	0.076	-0.273	-0.076	0.273	Trypodendron_domesticum_NC_036286_1	0.145237	5	3.112	Trypodendron_domesticum_NC_036286	Trypodendron_domesticum_NC_036286	double
3	NC_046398.1	Acropyga sauteri	Acropyga_sauteri_NC_046398_1	Insecta	Hymenoptera	Formicidae	Acropyga	Arthropoda	F	H	16976	14941	-0.343	0.112512	41.6	41.5	11.5	5.4	83.1	16.9	46.9	0.001	-0.364	-0.001	0.364	Acropyga_sauteri_NC_046398_1	0.119875	5	4.269	Acropyga_sauteri_NC_046398	Acropyga_sauteri_NC_046398	double
3	NC_011594.1	Acyrthosiphon pisum	Acyrthosiphon_pisum_NC_011594_1	Insecta	Hemiptera	Aphididae	Acyrthosiphon	Arthropoda	F	H	16971	14389	-0.261	0.152142	46.4	38.3	9.8	5.5	84.7	15.3	43.8	0.095	-0.285	-0.095	0.285	Acyrthosiphon_pisum_NC_011594_1	0.152142	5	3.904	Acyrthosiphon_pisum_NC_011594	Acyrthosiphon_pisum_NC_011594	double
5	NC_049012.1	Neilupotamon xinganense	Neilupotamon_xinganense_NC_049012_1	Malacostraca	Decapoda	Potamidae	Neilupotamon	Arthropoda	F	H	16965	14738	-0.313	0.0910109	33.5	33.6	22.1	10.8	67.1	32.9	44.4	-0.001	-0.341	0.001	0.341	Neilupotamon_xinganense_NC_049012_1	0.13127	5	2.824	Neilupotamon_xinganense_NC_049012	Neilupotamon_xinganense_NC_049012	double
3	NC_028598.1	Callicerus obscurus	Callicerus_obscurus_NC_028598_1	Insecta	Coleoptera	Staphylinidae	Callicerus	Arthropoda	F	H	16954	14554	-0.18	0.14156	40.9	39	12	8	79.9	20	47	0.024	-0.196	-0.024	0.196	Callicerus_obscurus_NC_028598_1	0.14156	5	2.528	Callicerus_obscurus_NC_028598	Callicerus_obscurus_NC_028598	double
3	NC_036038.1	Prosopocoilus confucius	Prosopocoilus_confucius_NC_036038_1	Insecta	Coleoptera	Lucanidae	Prosopocoilus	Arthropoda	F	H	16951	14542	-0.349	0.0358681	36.5	31.3	21.9	10.3	67.8	32.2	41.6	0.077	-0.362	-0.077	0.362	Prosopocoilus_confucius_NC_036038_1	0.142116	5	2.539	Prosopocoilus_confucius_NC_036038	Prosopocoilus_confucius_NC_036038	double
3	NC_050318.1	Acnemia nitidicollis	Acnemia_nitidicollis_NC_050318_1	Insecta	Diptera	Mycetophilidae	Acnemia	Arthropoda	F	H	16950	14792	-0.188	0.120885	42.2	38.3	11.8	7.8	80.5	19.6	46.1	0.049	-0.206	-0.049	0.206	Acnemia_nitidicollis_NC_050318_1	0.127316	5	2.471	Acnemia_nitidicollis_NC_050318	Acnemia_nitidicollis_NC_050318	double
3	NC_045239.1	Dasypogon diadema	Dasypogon_diadema_NC_045239_1	Insecta	Diptera	Asilidae	Dasypogon	Arthropoda	F	H	16947	13672	-0.237	0.125863	39.9	33.5	16.3	10.3	73.4	26.6	43.8	0.087	-0.228	-0.087	0.228	Dasypogon_diadema_NC_045239_1	0.157137	5	2.368	Dasypogon_diadema_NC_045239	Dasypogon_diadema_NC_045239	double
3	NC_039576.1	Anoplolepis gracilipes	Anoplolepis_gracilipes_NC_039576_1	Insecta	Hymenoptera	Formicidae	Anoplolepis	Arthropoda	F	H	16943	14973	-0.313	0.112731	39.9	41.8	12.1	6.2	81.7	18.3	48	-0.024	-0.322	0.024	0.322	Anoplolepis_gracilipes_NC_039576_1	0.116272	5	4.095	Anoplolepis_gracilipes_NC_039576	Anoplolepis_gracilipes_NC_039576	double
3	NC_044788.1	Vesta saturnalis	Vesta_saturnalis_NC_044788_1	Insecta	Coleoptera	Lampyridae	Vesta	Arthropoda	F	H	16932	14527	-0.147	0.142039	44.1	36	11.5	8.3	80.1	19.8	44.3	0.101	-0.16	-0.101	0.16	Vesta_saturnalis_NC_044788_1	0.142039	5	2.796	Vesta_saturnalis_NC_044788	Vesta_saturnalis_NC_044788	double
3	NC_056373.1	Periscepsia handlirschi	Periscepsia_handlirschi_NC_056373_1	Insecta	Diptera	Tachinidae	Periscepsia	Arthropoda	Parasitoid	H	16929	14688	-0.18	0.0663949	41.8	38.1	11.8	8.2	79.9	20	46.3	0.046	-0.183	-0.046	0.183	Periscepsia_handlirschi_NC_056373_1	0.132376	5	2.682	Periscepsia_handlirschi_NC_056373	Periscepsia_handlirschi_NC_056373	double
4	NC_004816.1	Lepidopsocidae sp. RS-2001	Lepidopsocidae_sp__RS_2001_NC_004816_1	Insecta	Psocoptera	Lepidopsocidae	Lepidopsocidae	Arthropoda	F	H	16924	14703	-0.196	0.00596786	41.1	37.9	12.5	8.5	79	21	46.4	0.041	-0.189	-0.041	0.189	Lepidopsocidae_sp__RS_2001_NC_004816_1	0.131234	5	2.75	Lepidopsocidae_sp__RS_2001_NC_004816	Lepidopsocidae_sp__RS_2001_NC_004816	double
3	NC_016204.1	Arachnocampa flava	Arachnocampa_flava_NC_016204_1	Insecta	Diptera	Keroplatidae	Arachnocampa	Arthropoda	F	I	16923	14764	-0.171	0.018791	39.6	42.4	10.6	7.3	82	17.9	49.7	-0.034	-0.183	0.034	0.183	Arachnocampa_flava_NC_016204_1	0.126573	5	2.491	Arachnocampa_flava_NC_016204	Arachnocampa_flava_NC_016204	double
3	NC_036157.1	Sinodendron yunnanense	Sinodendron_yunnanense_NC_036157_1	Insecta	Coleoptera	Lucanidae	Sinodendron	Arthropoda	F	H	16921	14606	-0.247	0.104072	38.8	36.2	15.8	9.1	75	24.9	45.3	0.035	-0.271	-0.035	0.271	Sinodendron_yunnanense_NC_036157_1	0.136812	5	2.495	Sinodendron_yunnanense_NC_036157	Sinodendron_yunnanense_NC_036157	double
3	NC_044759.1	Carabus granulatus	Carabus_granulatus_NC_044759_1	Insecta	Coleoptera	Carabidae	Carabus	Arthropoda	F	H	16918	14757	-0.174	0.0411396	41	37.4	12.7	8.9	78.4	21.6	46.3	0.046	-0.176	-0.046	0.176	Carabus_granulatus_NC_044759_1	0.127734	5	2.339	Carabus_granulatus_NC_044759	Carabus_granulatus_NC_044759	double
3	NC_026114.1	Microcerotermes parvus	Microcerotermes_parvus_NC_026114_1	Insecta	Blattodea	Termitidae	Microcerotermes	Arthropoda	F	H	16916	14820	-0.262	0.0441003	41.5	23.5	22.2	12.9	65	35.1	36.4	0.277	-0.266	-0.277	0.266	Microcerotermes_parvus_NC_026114_1	0.123906	5	2.762	Microcerotermes_parvus_NC_026114	Microcerotermes_parvus_NC_026114	double
3	NC_014694.1	Entoria okinawaensis	Entoria_okinawaensis_NC_014694_1	Insecta	Phasmatodea	Phasmatidae	Entoria	Arthropoda	F	H	16910	14588	-0.188	0.00106446	43.8	32.2	13.8	10.2	76	24	42.4	0.154	-0.152	-0.154	0.152	Entoria_okinawaensis_NC_014694_1	0.137315	5	2.839	Entoria_okinawaensis_NC_014694	Entoria_okinawaensis_NC_014694	double
3	NC_036292.1	Trypodendron signatum	Trypodendron_signatum_NC_036292_1	Insecta	Coleoptera	Curculionidae	Trypodendron	Arthropoda	F	H	16909	14547	-0.27	0.112011	41.8	35.7	14.5	8	77.5	22.5	43.7	0.079	-0.289	-0.079	0.289	Trypodendron_signatum_NC_036292_1	0.139689	5	3.098	Trypodendron_signatum_NC_036292	Trypodendron_signatum_NC_036292	double
3	NC_018352.1	Necrophila americana	Necrophila_americana_NC_018352_1	Insecta	Coleoptera	Silphidae	Necrophila	Arthropoda	F	H	16902	14661	-0.181	0.00266241	38.4	36.3	15.1	10.2	74.7	25.3	46.5	0.029	-0.194	-0.029	0.194	Necrophila_americana_NC_018352_1	0.132588	5	2.511	Necrophila_americana_NC_018352	Necrophila_americana_NC_018352	double
3	NC_046890.1	Cheirotonus gestroi	Cheirotonus_gestroi_NC_046890_1	Insecta	Coleoptera	Scarabaeidae	Cheirotonus	Arthropoda	F	H	16899	14619	-0.278	0.00224865	38.8	31.9	18.5	10.7	70.7	29.2	42.6	0.097	-0.268	-0.097	0.268	Cheirotonus_gestroi_NC_046890_1	0.134919	5	2.547	Cheirotonus_gestroi_NC_046890	Cheirotonus_gestroi_NC_046890	double
3	NC_031154.1	Callianassa ceramica	Callianassa_ceramica_NC_031154_1	Malacostraca	Decapoda	Callianassidae	Callianassa	Arthropoda	F	H	16899	14377	-0.027	0.148944	32.9	36.8	15.7	14.6	69.7	30.3	51.4	-0.056	-0.039	0.056	0.039	Callianassa_ceramica_NC_031154_1	0.14924	5	2.719	Callianassa_ceramica_NC_031154	Callianassa_ceramica_NC_031154	double
5	NC_042685.1	Pseudohelice subquadrata	Pseudohelice_subquadrata_NC_042685_1	Malacostraca	Decapoda	Varunidae	Pseudohelice	Arthropoda	F	H	16898	15232	-0.342	0.0978222	34.2	33.5	21.7	10.5	67.7	32.2	44	0.01	-0.347	-0.01	0.347	Pseudohelice_subquadrata_NC_042685_1	0.0985915	5	2.784	Pseudohelice_subquadrata_NC_042685	Pseudohelice_subquadrata_NC_042685	double
3	NC_016184.1	Euphausia pacifica	Euphausia_pacifica_NC_016184_1	Malacostraca	Euphausiacea	Euphausiidae	Euphausia	Arthropoda	F	H	16898	14577	-0.141	0.136998	36.1	35.9	16	12	72	28	47.9	0.004	-0.145	-0.004	0.145	Euphausia_pacifica_NC_016184_1	0.137354	5	2.365	Euphausia_pacifica_NC_016184	Euphausia_pacifica_NC_016184	double
3	NC_011755.1	Nezara viridula	Nezara_viridula_NC_011755_1	Insecta	Hemiptera	Pentatomidae	Nezara	Arthropoda	F	H	16889	14594	-0.136	0.00621706	43.2	33.6	13.3	9.8	76.8	23.1	43.4	0.125	-0.149	-0.125	0.149	Nezara_viridula_NC_011755_1	0.135887	5	3.035	Nezara_viridula_NC_011755	Nezara_viridula_NC_011755	double
3	NC_051933.1	Hymaea magna	Hymaea_magna_NC_051933_1	Insecta	Coleoptera	Phloeostichidae	Hymaea	Arthropoda	F	H	16888	14617	-0.192	0.0021909	40.3	37.5	13.4	8.8	77.8	22.2	46.3	0.037	-0.208	-0.037	0.208	Hymaea_magna_NC_051933_1	0.134474	5	2.627	Hymaea_magna_NC_051933	Hymaea_magna_NC_051933	double
3	NC_026704.1	Streptocephalus sirindhornae	Streptocephalus_sirindhornae_NC_026704_1	Branchiopoda	Anostraca	Streptocephalidae	Streptocephalus	Arthropoda	F	H	16887	13994	-0.074	0.171256	33.7	30.9	18.9	16.5	64.6	35.4	47.4	0.042	-0.069	-0.042	0.069	Streptocephalus_sirindhornae_NC_026704_1	0.171315	5	2.981	Streptocephalus_sirindhornae_NC_026704	Streptocephalus_sirindhornae_NC_026704	double
3	NC_046425.1	Acropyga pallida	Acropyga_pallida_NC_046425_1	Insecta	Hymenoptera	Formicidae	Acropyga	Arthropoda	F	H	16886	14946	-0.336	0.114474	42.4	40.8	11.3	5.4	83.2	16.7	46.2	0.02	-0.352	-0.02	0.352	Acropyga_pallida_NC_046425_1	0.114888	5	4.235	Acropyga_pallida_NC_046425	Acropyga_pallida_NC_046425	double
5	NC_042240.1	Paralithodes platypus	Paralithodes_platypus_NC_042240_1	Malacostraca	Decapoda	Lithodidae	Paralithodes	Arthropoda	F	H	16883	14766	-0.128	0.118403	36.2	37	14.9	12	73.2	26.9	49	-0.011	-0.11	0.011	0.11	Paralithodes_platypus_NC_042240_1	0.125392	5	2.602	Paralithodes_platypus_NC_042240	Paralithodes_platypus_NC_042240	double
3	NC_038225.1	Luciola curtithorax	Luciola_curtithorax_NC_038225_1	Insecta	Coleoptera	Lampyridae	Luciola	Arthropoda	F	H	16882	14523	-0.18	0.00544959	45	35	11.8	8.2	80	20	43.2	0.124	-0.185	-0.124	0.185	Luciola_curtithorax_NC_038225_1	0.139735	5	2.799	Luciola_curtithorax_NC_038225	Luciola_curtithorax_NC_038225	double
3	NC_042200.1	Neuroperla schedingi	Neuroperla_schedingi_NC_042200_1	Insecta	Plecoptera	Eustheniidae	Neuroperla	Arthropoda	F	H	16882	14824	-0.263	0.00390949	36.7	30.6	21	11.7	67.3	32.7	42.3	0.091	-0.282	-0.091	0.282	Neuroperla_schedingi_NC_042200_1	0.121905	5	2.434	Neuroperla_schedingi_NC_042200	Neuroperla_schedingi_NC_042200	double
3	NC_043833.1	Polycheles baccatus	Polycheles_baccatus_NC_043833_1	Malacostraca	Decapoda	Polychelidae	Polycheles	Arthropoda	F	I	16880	14760	-0.359	0.122927	32	32.9	24.2	10.9	64.9	35.1	43.8	-0.014	-0.378	0.014	0.378	Polycheles_baccatus_NC_043833_1	0.125592	5	2.892	Polycheles_baccatus_NC_043833	Polycheles_baccatus_NC_043833	double
3	NC_036284.1	Xylosandrus crassiusculus	Xylosandrus_crassiusculus_NC_036284_1	Insecta	Coleoptera	Curculionidae	Xylosandrus	Arthropoda	F	I	16875	14325	-0.257	0.117393	39.5	34.8	16	9.7	74.3	25.7	44.5	0.064	-0.247	-0.064	0.247	Xylosandrus_crassiusculus_NC_036284_1	0.151111	5	3.201	Xylosandrus_crassiusculus_NC_036284	Xylosandrus_crassiusculus_NC_036284	double
3	NC_030284.1	Rediviva intermixta	Rediviva_intermixta_NC_030284_1	Insecta	Hymenoptera	Melittidae	Rediviva	Arthropoda	F	H	16875	14552	-0.063	0.111644	38.5	41.3	10.6	9.5	79.8	20.1	50.8	-0.035	-0.055	0.035	0.055	Rediviva_intermixta_NC_030284_1	0.137659	5	4.256	Rediviva_intermixta_NC_030284	Rediviva_intermixta_NC_030284	double
3	NC_051943.1	Deporaus marginatus	Deporaus_marginatus_NC_051943_1	Insecta	Coleoptera	Attelabidae	Deporaus	Arthropoda	F	H	16873	14320	-0.198	0.0475316	39.1	36.6	14.4	9.9	75.7	24.3	46.5	0.032	-0.187	-0.032	0.187	Deporaus_marginatus_NC_051943_1	0.151307	5	2.614	Deporaus_marginatus_NC_051943	Deporaus_marginatus_NC_051943	double
3	NC_036294.1	Gnathotrichus materiarius	Gnathotrichus_materiarius_NC_036294_1	Insecta	Coleoptera	Curculionidae	Gnathotrichus	Arthropoda	F	H	16871	14465	-0.283	0.126667	38.5	27.7	21.7	12.2	66.2	33.9	39.9	0.164	-0.282	-0.164	0.282	Gnathotrichus_materiarius_NC_036294_1	0.142612	5	3.078	Gnathotrichus_materiarius_NC_036294	Gnathotrichus_materiarius_NC_036294	double
3	NC_037749.1	Limbodessus palmulaoides	Limbodessus_palmulaoides_NC_037749_1	Insecta	Coleoptera	Dytiscidae	Limbodessus	Arthropoda	F	H	16868	14696	-0.236	0.0689471	40.2	36.4	14.6	8.7	76.6	23.3	45.1	0.05	-0.254	-0.05	0.254	Limbodessus_palmulaoides_NC_037749_1	0.128765	5	2.538	Limbodessus_palmulaoides_NC_037749	Limbodessus_palmulaoides_NC_037749	double
2	NC_060838.1	Tuberolachnus salignus	Tuberolachnus_salignus_NC_060838_1	Insecta	Hemiptera	Aphididae	Tuberolachnus	Arthropoda	F	I	16868	14452	-0.312	0.142459	46.1	38.1	10.4	5.4	84.2	15.8	43.5	0.094	-0.314	-0.094	0.314	Tuberolachnus_salignus_NC_060838_1	0.14323	5	3.933	Tuberolachnus_salignus_NC_060838	Tuberolachnus_salignus_NC_060838	double
3	NC_014705.1	Phraortes sp. Iriomote Island	Phraortes_sp__Iriomote_Island_NC_014705_1	Insecta	Phasmatodea	Lonchodidae	Phraortes	Arthropoda	F	H	16867	14496	-0.181	0.00112646	46.6	32.2	12.1	9.1	78.8	21.2	41.3	0.182	-0.142	-0.182	0.142	Phraortes_sp__Iriomote_Island_NC_014705_1	0.14057	5	2.819	Phraortes_sp__Iriomote_Island_NC_014705	Phraortes_sp__Iriomote_Island_NC_014705	double
5	NC_034927.1	Kiwa tyleri	Kiwa_tyleri_NC_034927_1	Malacostraca	Decapoda	Kiwaidae	Kiwa	Arthropoda	F	I	16865	14717	-0.199	0.0369404	37.9	41.4	12.6	8.1	79.3	20.7	49.5	-0.044	-0.22	0.044	0.22	Kiwa_tyleri_NC_034927_1	0.127364	5	2.684	Kiwa_tyleri_NC_034927	Kiwa_tyleri_NC_034927	double
3	NC_052916.1	Plagiodera versicolora	Plagiodera_versicolora_NC_052916_1	Insecta	Coleoptera	Chrysomelidae	Plagiodera	Arthropoda	F	H	16857	14562	-0.188	0.00249155	39.9	37.7	13.5	8.9	77.6	22.4	46.6	0.028	-0.206	-0.028	0.206	Plagiodera_versicolora_NC_052916_1	0.136145	5	2.715	Plagiodera_versicolora_NC_052916	Plagiodera_versicolora_NC_052916	double
3	NC_025276.1	Aquatica leii	Aquatica_leii_NC_025276_1	Insecta	Coleoptera	Lampyridae	Aquatica	Arthropoda	F	H	16856	14530	-0.191	0.00516137	42.3	34.8	13.9	9	77.1	22.9	43.8	0.097	-0.214	-0.097	0.214	Aquatica_leii_NC_025276_1	0.137992	5	2.74	Aquatica_leii_NC_025276	Aquatica_leii_NC_025276	double
3	NC_034293.1	Curculio davidi	Curculio_davidi_NC_034293_1	Insecta	Coleoptera	Curculionidae	Curculio	Arthropoda	F	H	16852	14653	-0.18	0.00361975	41	36.2	13.5	9.3	77.2	22.8	45.5	0.062	-0.185	-0.062	0.185	Curculio_davidi_NC_034293_1	0.130489	5	2.946	Curculio_davidi_NC_034293	Curculio_davidi_NC_034293	double
4	NC_044783.1	Alicella gigantea	Alicella_gigantea_NC_044783_1	Malacostraca	Amphipoda	Alicellidae	Alicella	Arthropoda	F	I	16851	13982	-0.299	0.170257	36.6	31.8	20.5	11	68.4	31.5	42.8	0.071	-0.301	-0.071	0.301	Alicella_gigantea_NC_044783_1	0.170257	5	3.117	Alicella_gigantea_NC_044783	Alicella_gigantea_NC_044783	double
3	NC_036365.1	Speleketor irwini	Speleketor_irwini_NC_036365_1	Insecta	Psocoptera	Prionoglarididae	Speleketor	Arthropoda	F	H	16849	14733	-0.393	0.112707	38.9	34.2	18.5	7.8	73.1	26.3	42	0.064	-0.407	-0.064	0.407	Speleketor_irwini_NC_036365_1	0.125586	5	2.901	Speleketor_irwini_NC_036365	Speleketor_irwini_NC_036365	double
3	NC_028597.1	Atrecus affinis	Atrecus_affinis_NC_028597_1	Insecta	Coleoptera	Staphylinidae	Atrecus	Arthropoda	F	H	16844	14424	-0.19	0.0206602	40.5	39.4	12	8.1	79.9	20.1	47.5	0.015	-0.197	-0.015	0.197	Atrecus_affinis_NC_028597_1	0.143671	5	2.462	Atrecus_affinis_NC_028597	Atrecus_affinis_NC_028597	double
3	NC_035060.1	Aquatica ficta	Aquatica_ficta_NC_035060_1	Insecta	Coleoptera	Lampyridae	Aquatica	Arthropoda	F	H	16836	14510	-0.191	0.0051081	42.3	34.8	13.8	9	77.1	22.8	43.8	0.097	-0.211	-0.097	0.211	Aquatica_ficta_NC_035060_1	0.138156	5	2.741	Aquatica_ficta_NC_035060	Aquatica_ficta_NC_035060	double
3	NC_021403.1	Cermatobius longicornis	Cermatobius_longicornis_NC_021403_1	Chilopoda	Lithobiomorpha	Henicopidae	Cermatobius	Arthropoda	F	H	16833	14372	-0.317	0.146142	34.7	28.7	24.1	12.5	63.4	36.6	41.2	0.095	-0.317	-0.095	0.317	Cermatobius_longicornis_NC_021403_1	0.146201	5	2.384	Cermatobius_longicornis_NC_021403	Cermatobius_longicornis_NC_021403	double
3	NC_034757.1	Phaneroptera nigroantennata	Phaneroptera_nigroantennata_NC_034757_1	Insecta	Orthoptera	Tettigoniidae	Phaneroptera	Arthropoda	F	H	16832	14763	-0.241	0.0643417	35.3	35.6	18.4	10.7	70.9	29.1	46.3	-0.004	-0.262	0.004	0.262	Phaneroptera_nigroantennata_NC_034757_1	0.122921	5	2.402	Phaneroptera_nigroantennata_NC_034757	Phaneroptera_nigroantennata_NC_034757	double
3	NC_046469.1	Carabus changeonleei	Carabus_changeonleei_NC_046469_1	Insecta	Coleoptera	Carabidae	Carabus	Arthropoda	F	H	16831	14788	-0.182	0.0196661	41.1	38.3	12.3	8.4	79.4	20.7	46.7	0.035	-0.189	-0.035	0.189	Carabus_changeonleei_NC_046469_1	0.121383	5	2.358	Carabus_changeonleei_NC_046469	Carabus_changeonleei_NC_046469	double
3	NC_042434.1	Melamphaus rubrocinctus	Melamphaus_rubrocinctus_NC_042434_1	Insecta	Hemiptera	Pyrrhocoridae	Melamphaus	Arthropoda	F	H	16828	14554	-0.263	0.0391015	41.7	31	16.9	10.4	72.7	27.3	41.4	0.148	-0.237	-0.148	0.237	Melamphaus_rubrocinctus_NC_042434_1	0.135132	5	3.107	Melamphaus_rubrocinctus_NC_042434	Melamphaus_rubrocinctus_NC_042434	double
2	NC_024440.1	Thenus orientalis	Thenus_orientalis_NC_024440_1	Malacostraca	Decapoda	Scyllaridae	Thenus	Arthropoda	F	H	16826	14873	-0.258	0.115892	31.1	31.3	23.8	13.9	62.4	37.7	45.2	-0.004	-0.263	0.004	0.263	Thenus_orientalis_NC_024440_1	0.11607	5	2.641	Thenus_orientalis_NC_024440	Thenus_orientalis_NC_024440	double
3	NC_036270.1	Hydrochus carinatus	Hydrochus_carinatus_NC_036270_1	Insecta	Coleoptera	Hydrochidae	Hydrochus	Arthropoda	F	H	16825	14470	-0.205	0.0580684	39.7	40	12.5	7.8	79.7	20.3	47.8	-0.004	-0.232	0.004	0.232	Hydrochus_carinatus_NC_036270_1	0.13997	5	2.437	Hydrochus_carinatus_NC_036270	Hydrochus_carinatus_NC_036270	double
3	NC_016469.1	Damaster mirabilissimus mirabilissimus	Damaster_mirabilissimus_mirabilissimus_NC_016469_1	Insecta	Coleoptera	Carabidae	Carabus	Arthropoda	F	H	16823	14797	-0.18	0.0191999	41.1	38.3	12.3	8.4	79.4	20.7	46.7	0.035	-0.188	-0.035	0.188	Damaster_mirabilissimus_mirabilissimus_NC_016469_1	0.12043	5	2.356	Damaster_mirabilissimus_mirabilissimus_NC_016469	Damaster_mirabilissimus_mirabilissimus_NC_016469	double
3	NC_030362.1	Aradus compar	Aradus_compar_NC_030362_1	Insecta	Hemiptera	Aradidae	Aradus	Arthropoda	F	H	16814	14488	-0.191	0.135661	37.9	26.2	21.6	14.4	64.1	36	40.6	0.182	-0.201	-0.182	0.201	Aradus_compar_NC_030362_1	0.138337	5	3.189	Aradus_compar_NC_030362	Aradus_compar_NC_030362	double
3	NC_039741.1	Idiocerus laurifoliae	Idiocerus_laurifoliae_NC_039741_1	Insecta	Hemiptera	Cicadellidae	Idiocerus	Arthropoda	F	H	16811	14293	-0.111	0.00243888	43.3	36.2	11.2	9.3	79.5	20.5	45.5	0.09	-0.093	-0.09	0.093	Idiocerus_laurifoliae_NC_039741_1	0.149783	5	3.207	Idiocerus_laurifoliae_NC_039741	Idiocerus_laurifoliae_NC_039741	double
3	NC_057080.1	Plautia crossota	Plautia_crossota_NC_057080_1	Insecta	Hemiptera	Pentatomidae	Plautia	Arthropoda	F	H	16809	14514	-0.159	0.00916176	41.6	32.8	14.8	10.8	74.4	25.6	43.6	0.119	-0.157	-0.119	0.157	Plautia_crossota_NC_057080_1	0.136534	5	3.026	Plautia_crossota_NC_057080	Plautia_crossota_NC_057080	double
3	NC_027591.1	Parochlus steinenii	Parochlus_steinenii_NC_027591_1	Insecta	Diptera	Chironomidae	Parochlus	Arthropoda	F	H	16803	14714	0.133	0.0426114	34.6	37.9	11.8	15.7	72.5	27.5	53.6	-0.046	0.141	0.046	-0.141	Parochlus_steinenii_NC_027591_1	0.124323	5	2.323	Parochlus_steinenii_NC_027591	Parochlus_steinenii_NC_027591	double
3	NC_028599.1	Dacrila fallax	Dacrila_fallax_NC_028599_1	Insecta	Coleoptera	Staphylinidae	Dacrila	Arthropoda	F	H	16802	14528	-0.167	0.0109511	40.1	38.2	12.9	8.7	78.3	21.6	46.9	0.024	-0.194	-0.024	0.194	Dacrila_fallax_NC_028599_1	0.135341	5	2.492	Dacrila_fallax_NC_028599	Dacrila_fallax_NC_028599	double
3	NC_029887.1	Oligolophus tienmushanensis	Oligolophus_tienmushanensis_NC_029887_1	Arachnida	Opiliones	Phalangiidae	Oligolophus	Arthropoda	F	H	16798	12872	-0.252	0.142696	40.3	34.8	14.8	10.1	75.1	24.9	44.9	0.074	-0.188	-0.074	0.188	Oligolophus_tienmushanensis_NC_029887_1	0.146208	5	2.813	Oligolophus_tienmushanensis_NC_029887	Oligolophus_tienmushanensis_NC_029887	double
3	NC_050889.1	Trigonopterus triradiatus	Trigonopterus_triradiatus_NC_050889_1	Insecta	Coleoptera	Curculionidae	Trigonopterus	Arthropoda	F	I	16795	14629	-0.363	0.128967	35.8	30.9	22.6	10.6	66.7	33.2	41.5	0.073	-0.361	-0.073	0.361	Trigonopterus_triradiatus_NC_050889_1	0.128967	5	3.163	Trigonopterus_triradiatus_NC_050889	Trigonopterus_triradiatus_NC_050889	double
3	NC_036507.1	Carabus lafossei	Carabus_lafossei_NC_036507_1	Insecta	Coleoptera	Carabidae	Carabus	Arthropoda	F	H	16793	14808	-0.167	0.0175668	41.2	38.5	11.9	8.4	79.7	20.3	46.9	0.033	-0.172	-0.033	0.172	Carabus_lafossei_NC_036507_1	0.118204	5	2.361	Carabus_lafossei_NC_036507	Carabus_lafossei_NC_036507	double
3	NC_054285.1	Polyphylla gracilicornis	Polyphylla_gracilicornis_NC_054285_1	Insecta	Coleoptera	Scarabaeidae	Polyphylla	Arthropoda	F	H	16793	14620	-0.325	0.00256059	37	31.9	20.7	10.4	68.9	31.1	42.3	0.073	-0.33	-0.073	0.33	Polyphylla_gracilicornis_NC_054285_1	0.129399	5	2.627	Polyphylla_gracilicornis_NC_054285	Polyphylla_gracilicornis_NC_054285	double
3	NC_044096.1	Serrognathus platymelus	Serrognathus_platymelus_NC_044096_1	Insecta	Coleoptera	Lucanidae	Serrognathus	Arthropoda	F	H	16790	14525	-0.284	0.0019059	36.9	31.5	19.9	11.1	68.4	31	42.6	0.078	-0.284	-0.078	0.284	Serrognathus_platymelus_NC_044096_1	0.134902	5	2.582	Serrognathus_platymelus_NC_044096	Serrognathus_platymelus_NC_044096	double
3	NC_035159.1	Aedes aegypti	Aedes_aegypti_NC_035159_1	Insecta	Diptera	Culicidae	Aedes	Arthropoda	MP	H	16790	14733	-0.193	0.119833	40.2	38.8	12.7	8.4	79	21.1	47.2	0.017	-0.206	-0.017	0.206	Aedes_aegypti_NC_035159_1	0.122513	5	2.483	Aedes_aegypti_NC_035159	Aedes_aegypti_NC_035159	double
3	NC_038142.1	Trioza erytreae	Trioza_erytreae_NC_038142_1	Insecta	Hemiptera	Triozidae	Trioza	Arthropoda	F	H	16788	13965	-0.169	0.105492	40.2	39.8	11.6	8.4	80	20	48.2	0.005	-0.162	-0.005	0.162	Trioza_erytreae_NC_038142_1	0.168156	5	4.403	Trioza_erytreae_NC_038142	Trioza_erytreae_NC_038142	double
3	NC_036066.1	Dorcadia ioffi	Dorcadia_ioffi_NC_036066_1	Insecta	Siphonaptera	Vermipsyllidae	Dorcadia	Arthropoda	EctoP	H	16785	14609	-0.184	0.00226393	40.1	40.6	11.6	7.7	80.7	19.3	48.3	-0.006	-0.198	0.006	0.198	Dorcadia_ioffi_NC_036066_1	0.12964	5	2.501	Dorcadia_ioffi_NC_036066	Dorcadia_ioffi_NC_036066	double
3	NC_028407.1	Cypridopsis vidua	Cypridopsis_vidua_NC_028407_1	Ostracoda	Podocopida	Cyprididae	Cypridopsis	Arthropoda	F	H	16783	14344	-0.198	0.145326	36.7	37	15.7	10.5	73.7	26.2	47.5	-0.004	-0.199	0.004	0.199	Cypridopsis_vidua_NC_028407_1	0.145326	5	2.73	Cypridopsis_vidua_NC_028407	Cypridopsis_vidua_NC_028407	double
8	NC_007177.1	Leptotrombidium pallidum	Leptotrombidium_pallidum_NC_007177_1	Arachnida	Trombidiformes	Trombiculidae	Leptotrombidium	Arthropoda	F	L	16779	14077	-0.052	0.161035	34.4	36.6	15.2	13.9	71	29.1	50.5	-0.031	-0.044	0.031	0.044	Leptotrombidium_pallidum_NC_007177_1	0.161035	5	5.783	Leptotrombidium_pallidum_NC_007177	Leptotrombidium_pallidum_NC_007177	double
3	NC_060322.1	Trachys variolaris	Trachys_variolaris_NC_060322_1	Insecta	Coleoptera	Buprestidae	Trachys	Arthropoda	F	H	16771	14579	-0.193	0.00220619	39.9	32.2	16.9	11	72.1	27.9	43.2	0.107	-0.209	-0.107	0.209	Trachys_variolaris_NC_060322_1	0.130702	5	2.586	Trachys_variolaris_NC_060322	Trachys_variolaris_NC_060322	double
5	NC_041152.1	Gebiacantha plantae	Gebiacantha_plantae_NC_041152_1	Malacostraca	Decapoda	Upogebiidae	Gebiacantha	Arthropoda	F	H	16771	14768	-0.234	0.119253	33.4	32.9	21.1	12.6	66.3	33.7	45.5	0.007	-0.253	-0.007	0.253	Gebiacantha_plantae_NC_041152_1	0.119432	5	2.51	Gebiacantha_plantae_NC_041152	Gebiacantha_plantae_NC_041152	double
3	NC_043903.1	Aphis citricidus	Aphis_citricidus_NC_043903_1	Insecta	Hemiptera	Aphididae	Aphis	Arthropoda	F	I	16763	14366	-0.283	0.142934	45.1	38.9	10.5	5.5	84	16	44.4	0.073	-0.309	-0.073	0.309	Aphis_citricidus_NC_043903_1	0.142993	5	3.962	Aphis_citricidus_NC_043903	Aphis_citricidus_NC_043903	double
3	NC_042431.1	Pyrrhopeplus carduelis	Pyrrhopeplus_carduelis_NC_042431_1	Insecta	Hemiptera	Pyrrhocoridae	Pyrrhopeplus	Arthropoda	F	H	16762	14525	-0.221	0.00948574	41.7	32.7	15.9	9.7	74.4	25.6	42.4	0.121	-0.242	-0.121	0.242	Pyrrhopeplus_carduelis_NC_042431_1	0.133457	5	3.063	Pyrrhopeplus_carduelis_NC_042431	Pyrrhopeplus_carduelis_NC_042431	double
3	NC_060421.1	Lysmata debelius	Lysmata_debelius_NC_060421_1	Malacostraca	Decapoda	Hippolytidae	Lysmata	Arthropoda	F	H	16757	14815	-0.208	0.115773	33	34.1	19.7	13.1	67.1	32.8	47.2	-0.016	-0.199	0.016	0.199	Lysmata_debelius_NC_060421_1	0.115892	5	2.551	Lysmata_debelius_NC_060421	Lysmata_debelius_NC_060421	double
3	NC_041423.1	Podagricomela nigricollis	Podagricomela_nigricollis_NC_041423_1	Insecta	Coleoptera	Chrysomelidae	Podagricomela	Arthropoda	F	H	16756	14620	-0.166	0.0892218	41.2	37.6	12.6	8.7	78.8	21.3	46.3	0.046	-0.183	-0.046	0.183	Podagricomela_nigricollis_NC_041423_1	0.127477	5	2.718	Podagricomela_nigricollis_NC_041423	Podagricomela_nigricollis_NC_041423	double
3	NC_060712.1	Orthotomicus erosus	Orthotomicus_erosus_NC_060712_1	Insecta	Coleoptera	Curculionidae	Orthotomicus	Arthropoda	F	H	16753	14702	-0.263	0.122426	37.2	33.5	18.6	10.7	70.7	29.3	44.2	0.053	-0.273	-0.053	0.273	Orthotomicus_erosus_NC_060712_1	0.122426	5	3.067	Orthotomicus_erosus_NC_060712	Orthotomicus_erosus_NC_060712	double
3	NC_044762.1	Eurydema dominulus	Eurydema_dominulus_NC_044762_1	Insecta	Hemiptera	Pentatomidae	Eurydema	Arthropoda	F	H	16752	14582	-0.131	0.00787966	41.4	34.8	13.1	10.7	76.2	23.8	45.5	0.086	-0.102	-0.086	0.102	Eurydema_dominulus_NC_044762_1	0.129537	5	3.032	Eurydema_dominulus_NC_044762	Eurydema_dominulus_NC_044762	double
3	NC_026711.1	Formica selysi	Formica_selysi_NC_026711_1	Insecta	Hymenoptera	Formicidae	Formica	Arthropoda	F	H	16752	15029	-0.303	0.101421	40.3	42.9	11.1	5.7	83.2	16.8	48.6	-0.031	-0.324	0.031	0.324	Formica_selysi_NC_026711_1	0.102853	5	4.087	Formica_selysi_NC_026711	Formica_selysi_NC_026711	double
3	NC_050890.1	Trigonopterus singkawangensis	Trigonopterus_singkawangensis_NC_050890_1	Insecta	Coleoptera	Curculionidae	Trigonopterus	Arthropoda	F	I	16742	14618	-0.365	0.126867	38.8	30.1	21.2	9.9	68.9	31.1	40	0.127	-0.362	-0.127	0.362	Trigonopterus_singkawangensis_NC_050890_1	0.126867	5	3.257	Trigonopterus_singkawangensis_NC_050890	Trigonopterus_singkawangensis_NC_050890	double
3	NC_052885.1	Ochthebius plesiotypus	Ochthebius_plesiotypus_NC_052885_1	Insecta	Coleoptera	Hydraenidae	Ochthebius	Arthropoda	F	I	16740	14543	-0.158	0.0397252	41.5	38.4	11.8	8.4	79.9	20.2	46.8	0.039	-0.168	-0.039	0.168	Ochthebius_plesiotypus_NC_052885_1	0.131243	5	2.452	Ochthebius_plesiotypus_NC_052885	Ochthebius_plesiotypus_NC_052885	double
3	NC_034912.1	Anastrepha fraterculus	Anastrepha_fraterculus_NC_034912_1	Insecta	Diptera	Tephritidae	Anastrepha	Arthropoda	F	H	16739	14761	-0.198	0.115539	41	36.1	13.8	9.1	77.1	22.9	45.2	0.063	-0.204	-0.063	0.204	Anastrepha_fraterculus_NC_034912_1	0.118167	5	2.393	Anastrepha_fraterculus_NC_034912	Anastrepha_fraterculus_NC_034912	double
3	NC_027580.1	Prosopocoilus gracilis	Prosopocoilus_gracilis_NC_027580_1	Insecta	Coleoptera	Lucanidae	Prosopocoilus	Arthropoda	F	H	16736	14533	-0.326	0.00227055	36.6	29.5	22.6	11.3	66.1	33.9	40.8	0.106	-0.332	-0.106	0.332	Prosopocoilus_gracilis_NC_027580_1	0.131632	5	2.631	Prosopocoilus_gracilis_NC_027580	Prosopocoilus_gracilis_NC_027580	double
3	NC_050676.1	Lysmata amboinensis	Lysmata_amboinensis_NC_050676_1	Malacostraca	Decapoda	Hippolytidae	Lysmata	Arthropoda	F	H	16735	14805	-0.212	0.112877	31.7	32.4	21.6	14.3	64.1	35.9	46.7	-0.011	-0.204	0.011	0.204	Lysmata_amboinensis_NC_050676_1	0.115327	5	2.562	Lysmata_amboinensis_NC_050676	Lysmata_amboinensis_NC_050676	double
3	NC_052691.1	Chloriona tateyamana	Chloriona_tateyamana_NC_052691_1	Insecta	Hemiptera	Delphacidae	Chloriona	Arthropoda	F	H	16729	14180	-0.241	0.0209218	42.3	32.4	16	9.4	74.7	25.4	41.8	0.133	-0.261	-0.133	0.261	Chloriona_tateyamana_NC_052691_1	0.15237	5	3.799	Chloriona_tateyamana_NC_052691	Chloriona_tateyamana_NC_052691	double
3	NC_019618.1	Chrysopa pallens	Chrysopa_pallens_NC_019618_1	Insecta	Neuroptera	Chrysopidae	Chrysopa	Arthropoda	F	H	16723	14683	-0.136	0.00807271	39.9	39.6	11.7	8.7	79.5	20.4	48.3	0.004	-0.145	-0.004	0.145	Chrysopa_pallens_NC_019618_1	0.121988	5	2.378	Chrysopa_pallens_NC_019618	Chrysopa_pallens_NC_019618	double
5	NC_020029.1	Paralithodes camtschaticus	Paralithodes_camtschaticus_NC_020029_1	Malacostraca	Decapoda	Lithodidae	Paralithodes	Arthropoda	F	H	16720	14786	-0.134	0.115132	37	36.8	14.8	11.4	73.8	26.2	48.2	0.003	-0.132	-0.003	0.132	Paralithodes_camtschaticus_NC_020029_1	0.11567	5	2.609	Paralithodes_camtschaticus_NC_020029	Paralithodes_camtschaticus_NC_020029	double
3	NC_035755.1	Aquatica lateralis	Aquatica_lateralis_NC_035755_1	Insecta	Coleoptera	Lampyridae	Aquatica	Arthropoda	F	H	16719	14530	-0.208	0.00532328	42.5	34.3	14.2	9	76.8	23.2	43.3	0.106	-0.222	-0.106	0.222	Aquatica_lateralis_NC_035755_1	0.130929	5	2.748	Aquatica_lateralis_NC_035755	Aquatica_lateralis_NC_035755	double
3	NC_053559.1	Mukaria splendida	Mukaria_splendida_NC_053559_1	Insecta	Hemiptera	Cicadellidae	Mukaria	Arthropoda	F	H	16711	14305	-0.168	0.00335109	44.5	34.5	12.2	8.8	79	21	43.3	0.126	-0.164	-0.126	0.164	Mukaria_splendida_NC_053559_1	0.143977	5	3.395	Mukaria_splendida_NC_053559	Mukaria_splendida_NC_053559	double
3	NC_056127.1	Sogatella kolophon	Sogatella_kolophon_NC_056127_1	Insecta	Hemiptera	Delphacidae	Sogatella	Arthropoda	F	H	16708	14343	-0.172	0.00993536	42.5	35.1	12.7	9.7	77.6	22.4	44.8	0.096	-0.134	-0.096	0.134	Sogatella_kolophon_NC_056127_1	0.147774	5	3.874	Sogatella_kolophon_NC_056127	Sogatella_kolophon_NC_056127	double
3	NC_048472.1	Altica viridicyanea	Altica_viridicyanea_NC_048472_1	Insecta	Coleoptera	Chrysomelidae	Altica	Arthropoda	F	H	16706	14465	-0.199	0.00413025	40.3	37.5	13.7	8.6	77.8	22.3	46.1	0.036	-0.228	-0.036	0.228	Altica_viridicyanea_NC_048472_1	0.134143	5	2.848	Altica_viridicyanea_NC_048472	Altica_viridicyanea_NC_048472	double
3	NC_042801.1	Anaxandra taurina	Anaxandra_taurina_NC_042801_1	Insecta	Hemiptera	Acanthosomatidae	Anaxandra	Arthropoda	F	H	16694	14489	-0.148	0.00455253	43.9	32.3	13.8	10	76.2	23.8	42.3	0.152	-0.159	-0.152	0.159	Anaxandra_taurina_NC_042801_1	0.132083	5	3.02	Anaxandra_taurina_NC_042801	Anaxandra_taurina_NC_042801	double
3	NC_039709.1	Apis andreniformis	Apis_andreniformis_NC_039709_1	Insecta	Hymenoptera	Apidae	Apis	Arthropoda	F	H	16694	14666	-0.084	0.107763	41.6	44.1	7.7	6.6	85.7	14.3	50.7	-0.029	-0.075	0.029	0.075	Apis_andreniformis_NC_039709_1	0.121481	5	4.663	Apis_andreniformis_NC_039709	Apis_andreniformis_NC_039709	double
3	NC_051484.1	Nomia chalybeata	Nomia_chalybeata_NC_051484_1	Insecta	Hymenoptera	Halictidae	Nomia	Arthropoda	F	H	16692	14604	-0.255	0.0625449	44.2	41.2	9.3	5.3	85.4	14.6	46.5	0.035	-0.269	-0.035	0.269	Nomia_chalybeata_NC_051484_1	0.12509	5	4.34	Nomia_chalybeata_NC_051484	Nomia_chalybeata_NC_051484	double
3	NC_056299.1	Aleyrodes shizuokensis	Aleyrodes_shizuokensis_NC_056299_1	Insecta	Hemiptera	Aleyrodidae	Aleyrodes	Arthropoda	F	H	16687	14193	0.242	0.148978	33.8	47	7	12.2	80.8	19.2	59.2	-0.163	0.268	0.163	-0.268	Aleyrodes_shizuokensis_NC_056299_1	0.149458	5	4.245	Aleyrodes_shizuokensis_NC_056299	Aleyrodes_shizuokensis_NC_056299	double
3	NC_049861.1	Nylanderia flavipes	Nylanderia_flavipes_NC_049861_1	Insecta	Hymenoptera	Formicidae	Nylanderia	Arthropoda	F	H	16687	14901	-0.325	0.105112	39.3	41.9	12.7	6.2	81.2	18.9	48.1	-0.032	-0.347	0.032	0.347	Nylanderia_flavipes_NC_049861_1	0.107029	5	4.124	Nylanderia_flavipes_NC_049861	Nylanderia_flavipes_NC_049861	double
3	NC_023233.1	Vestalis melania	Vestalis_melania_NC_023233_1	Insecta	Odonata	Calopterygidae	Vestalis	Arthropoda	F	H	16685	14576	-0.137	0.00437519	37.6	26.5	21.1	14.7	64.1	35.8	41.2	0.173	-0.18	-0.173	0.18	Vestalis_melania_NC_023233_1	0.126401	5	2.711	Vestalis_melania_NC_023233	Vestalis_melania_NC_023233	double
6	NC_026215.1	Astacopsis gouldi	Astacopsis_gouldi_NC_026215_1	Malacostraca	Decapoda	Parastacidae	Astacopsis	Arthropoda	F	H	16678	14618	-0.321	0.123036	34.4	32.2	22.1	11.3	66.6	33.4	43.5	0.033	-0.324	-0.033	0.324	Astacopsis_gouldi_NC_026215_1	0.123516	5	2.772	Astacopsis_gouldi_NC_026215	Astacopsis_gouldi_NC_026215	double
3	NC_044789.1	Curtos bilineatus	Curtos_bilineatus_NC_044789_1	Insecta	Coleoptera	Lampyridae	Curtos	Arthropoda	F	H	16677	14487	-0.217	0.131319	43.9	36.8	11.7	7.6	80.7	19.3	44.4	0.088	-0.213	-0.088	0.213	Curtos_bilineatus_NC_044789_1	0.131319	5	2.839	Curtos_bilineatus_NC_044789	Curtos_bilineatus_NC_044789	double
3	NC_037750.1	Paroster macrosturtensis	Paroster_macrosturtensis_NC_037750_1	Insecta	Coleoptera	Dytiscidae	Paroster	Arthropoda	F	H	16676	14712	-0.234	0.0288438	39.3	35.8	15.5	9.4	75.1	24.9	45.2	0.046	-0.242	-0.046	0.242	Paroster_macrosturtensis_NC_037750_1	0.117774	5	2.45	Paroster_macrosturtensis_NC_037750	Paroster_macrosturtensis_NC_037750	double
3	NC_026132.1	Formica fusca	Formica_fusca_NC_026132_1	Insecta	Hymenoptera	Formicidae	Formica	Arthropoda	F	H	16673	15011	-0.303	0.0982427	40.3	43.1	11	5.6	83.4	16.6	48.7	-0.033	-0.322	0.033	0.322	Formica_fusca_NC_026132_1	0.0996821	5	4.086	Formica_fusca_NC_026132	Formica_fusca_NC_026132	double
3	NC_026219.1	Limnephilus decipiens	Limnephilus_decipiens_NC_026219_1	Insecta	Trichoptera	Limnephilidae	Limnephilus	Arthropoda	F	H	16667	14720	-0.236	0.00377992	39.4	40.1	12.5	7.9	79.5	20.4	48	-0.009	-0.227	0.009	0.227	Limnephilus_decipiens_NC_026219_1	0.115918	5	3.009	Limnephilus_decipiens_NC_026219	Limnephilus_decipiens_NC_026219	double
3	NC_036293.1	Anisandrus dispar	Anisandrus_dispar_NC_036293_1	Insecta	Coleoptera	Curculionidae	Anisandrus	Arthropoda	F	H	16665	14402	-0.271	0.123312	40	32.6	17.1	10.3	72.6	27.4	42.9	0.103	-0.252	-0.103	0.252	Anisandrus_dispar_NC_036293_1	0.135794	5	3.186	Anisandrus_dispar_NC_036293	Anisandrus_dispar_NC_036293	double
3	NC_006817.1	Aedes albopictus	Aedes_albopictus_NC_006817_1	Insecta	Diptera	Culicidae	Aedes	Arthropoda	MP	H	16665	14821	-0.171	0.00432043	40.1	39.5	12.1	8.4	79.6	20.5	47.9	0.008	-0.181	-0.008	0.181	Aedes_albopictus_NC_006817_1	0.110651	5	2.534	Aedes_albopictus_NC_006817	Aedes_albopictus_NC_006817	double
3	NC_037751.1	Paroster mesosturtensis	Paroster_mesosturtensis_NC_037751_1	Insecta	Coleoptera	Dytiscidae	Paroster	Arthropoda	F	H	16663	14704	-0.242	0.0287463	40.1	37	14.3	8.7	77.1	23	45.7	0.04	-0.246	-0.04	0.246	Paroster_mesosturtensis_NC_037751_1	0.117566	5	2.443	Paroster_mesosturtensis_NC_037751	Paroster_mesosturtensis_NC_037751	double
3	NC_039181.1	Zele chlorophthalmus	Zele_chlorophthalmus_NC_039181_1	Insecta	Hymenoptera	Braconidae	Zele	Arthropoda	Parasitoid	H	16661	14442	0.164	0.0849889	43	39.8	7.1	10.1	82.8	17.2	49.9	0.038	0.176	-0.038	-0.176	Zele_chlorophthalmus_NC_039181_1	0.133185	5	4.378	Zele_chlorophthalmus_NC_039181	Zele_chlorophthalmus_NC_039181	double
3	NC_042807.1	Molipteryx lunata	Molipteryx_lunata_NC_042807_1	Insecta	Hemiptera	Coreidae	Molipteryx	Arthropoda	F	H	16660	14515	-0.197	0.00408163	41	32.9	16	10.2	73.9	26.2	43.1	0.109	-0.223	-0.109	0.223	Molipteryx_lunata_NC_042807_1	0.128752	5	3.101	Molipteryx_lunata_NC_042807	Molipteryx_lunata_NC_042807	double
3	NC_019595.1	Gorpis annulatus	Gorpis_annulatus_NC_019595_1	Insecta	Hemiptera	Nabidae	Gorpis	Arthropoda	F	H	16660	14605	-0.157	0.0519808	40.6	34.9	13.9	10.6	75.5	24.5	45.5	0.076	-0.137	-0.076	0.137	Gorpis_annulatus_NC_019595_1	0.123349	5	2.945	Gorpis_annulatus_NC_019595	Gorpis_annulatus_NC_019595	double
3	NC_046424.1	Acropyga myops	Acropyga_myops_NC_046424_1	Insecta	Hymenoptera	Formicidae	Acropyga	Arthropoda	F	H	16659	14878	-0.29	0.101807	43.2	41.9	9.7	5.2	85.1	14.9	47.1	0.016	-0.304	-0.016	0.304	Acropyga_myops_NC_046424_1	0.106909	5	4.262	Acropyga_myops_NC_046424	Acropyga_myops_NC_046424	double
3	NC_056282.1	Platycheirus albimanus	Platycheirus_albimanus_NC_056282_1	Insecta	Diptera	Syrphidae	Platycheirus	Arthropoda	F	H	16648	14807	-0.126	0.0097309	40.7	40.3	10.7	8.2	81	18.9	48.5	0.005	-0.132	-0.005	0.132	Platycheirus_albimanus_NC_056282_1	0.110584	5	2.432	Platycheirus_albimanus_NC_056282	Platycheirus_albimanus_NC_056282	double
3	NC_050855.1	Nephus oblongosignatus	Nephus_oblongosignatus_NC_050855_1	Insecta	Coleoptera	Coccinellidae	Nephus	Arthropoda	F	H	16647	14452	-0.195	0.00732865	41.2	38.4	12.3	8.1	79.6	20.4	46.5	0.035	-0.209	-0.035	0.209	Nephus_oblongosignatus_NC_050855_1	0.131856	5	2.776	Nephus_oblongosignatus_NC_050855	Nephus_oblongosignatus_NC_050855	double
3	NC_013249.1	Macrogyrus oblongus	Macrogyrus_oblongus_NC_013249_1	Insecta	Coleoptera	Gyrinidae	Macrogyrus	Arthropoda	F	H	16643	14725	-0.203	0.00660938	40.6	37.4	13.3	8.7	78	22	46.1	0.042	-0.208	-0.042	0.208	Macrogyrus_oblongus_NC_013249_1	0.115244	5	2.381	Macrogyrus_oblongus_NC_013249	Macrogyrus_oblongus_NC_013249	double
3	NC_045848.1	Polionemobius taprobanensis	Polionemobius_taprobanensis_NC_045848_1	Insecta	Orthoptera	Gryllidae	Polionemobius	Arthropoda	F	H	16641	14538	-0.396	0.100355	34.6	35.7	20.5	9.1	70.3	29.6	44.8	-0.015	-0.384	0.015	0.384	Polionemobius_taprobanensis_NC_045848_1	0.126375	5	2.57	Polionemobius_taprobanensis_NC_045848	Polionemobius_taprobanensis_NC_045848	double
3	NC_059810.1	Youtuus strigatus	Youtuus_strigatus_NC_059810_1	Insecta	Hemiptera	Caliscelidae	Youtuus	Arthropoda	F	H	16640	14263	-0.244	0.00534856	46.8	33	12.5	7.7	79.8	20.2	40.7	0.172	-0.236	-0.172	0.236	Youtuus_strigatus_NC_059810_1	0.142849	5	3.582	Youtuus_strigatus_NC_059810	Youtuus_strigatus_NC_059810	double
3	NC_039823.1	Nemorilla maculosa	Nemorilla_maculosa_NC_039823_1	Insecta	Diptera	Tachinidae	Nemorilla	Arthropoda	Parasitoid	H	16638	14625	-0.157	0.0170093	42	39	11.1	7.9	81	19	46.9	0.037	-0.172	-0.037	0.172	Nemorilla_maculosa_NC_039823_1	0.120988	5	2.581	Nemorilla_maculosa_NC_039823	Nemorilla_maculosa_NC_039823	double
3	NC_046426.1	Acropyga panamensis	Acropyga_panamensis_NC_046426_1	Insecta	Hymenoptera	Formicidae	Acropyga	Arthropoda	F	H	16633	14855	-0.305	0.0630674	41.8	41.5	11.1	5.6	83.3	16.7	47.1	0.004	-0.324	-0.004	0.324	Acropyga_panamensis_NC_046426_1	0.106896	5	4.251	Acropyga_panamensis_NC_046426	Acropyga_panamensis_NC_046426	double
3	NC_060464.1	Teratura megafurcula	Teratura_megafurcula_NC_060464_1	Insecta	Orthoptera	Tettigoniidae	Teratura	Arthropoda	F	H	16633	14805	0.235	0.105273	33.6	35.7	11.6	19.1	69.3	30.7	54.8	-0.031	0.241	0.031	-0.241	Teratura_megafurcula_NC_060464_1	0.109902	5	2.363	Teratura_megafurcula_NC_060464	Teratura_megafurcula_NC_060464	double
3	NC_014702.1	Ramulus irregulariterdentatus	Ramulus_irregulariterdentatus_NC_014702_1	Insecta	Phasmatodea	Phasmatidae	Ramulus	Arthropoda	F	H	16633	14596	-0.141	0.000661336	43.2	32.8	13.3	10.7	76	24	43.5	0.136	-0.11	-0.136	0.11	Ramulus_irregulariterdentatus_NC_014702_1	0.122467	5	2.856	Ramulus_irregulariterdentatus_NC_014702	Ramulus_irregulariterdentatus_NC_014702	double
3	NC_044640.1	Pseudoregma bambucicola	Pseudoregma_bambucicola_NC_044640_1	Insecta	Hemiptera	Hormaphididae	Pseudoregma	Arthropoda	F	H	16632	14463	-0.284	0.100168	45.4	39.7	9.6	5.3	85.1	14.9	45	0.067	-0.292	-0.067	0.292	Pseudoregma_bambucicola_NC_044640_1	0.130411	5	3.822	Pseudoregma_bambucicola_NC_044640	Pseudoregma_bambucicola_NC_044640	double
3	NC_034781.1	Macrosteles quadrilineatus	Macrosteles_quadrilineatus_NC_034781_1	Insecta	Hemiptera	Cicadellidae	Macrosteles	Arthropoda	F	H	16626	14310	-0.154	0.0105257	43.6	34.4	12.6	9.4	78	22	43.8	0.117	-0.145	-0.117	0.145	Macrosteles_quadrilineatus_NC_034781_1	0.1393	5	3.265	Macrosteles_quadrilineatus_NC_034781	Macrosteles_quadrilineatus_NC_034781	double
3	NC_024745.1	Brontostoma colossus	Brontostoma_colossus_NC_024745_1	Insecta	Hemiptera	Reduviidae	Brontostoma	Arthropoda	F	H	16625	14578	-0.226	0.00902256	42.5	31.1	16.1	10.4	73.6	26.5	41.5	0.155	-0.215	-0.155	0.215	Brontostoma_colossus_NC_024745_1	0.123128	5	3.14	Brontostoma_colossus_NC_024745	Brontostoma_colossus_NC_024745	double
3	NC_059757.1	Eophileurus chinensis	Eophileurus_chinensis_NC_059757_1	Insecta	Coleoptera	Scarabaeidae	Eophileurus	Arthropoda	F	H	16624	14627	-0.285	0.0832531	37	32.1	19.9	11	69.1	30.9	43.1	0.07	-0.287	-0.07	0.287	Eophileurus_chinensis_NC_059757_1	0.120128	5	2.596	Eophileurus_chinensis_NC_059757	Eophileurus_chinensis_NC_059757	double
3	NC_030268.1	Anaxarcha zhengi	Anaxarcha_zhengi_NC_030268_1	Insecta	Mantodea	Hymenopodidae	Anaxarcha	Arthropoda	F	H	16620	14706	-0.151	0.00920578	41.5	36.2	12.9	9.4	77.7	22.3	45.6	0.068	-0.158	-0.068	0.158	Anaxarcha_zhengi_NC_030268_1	0.115162	5	2.741	Anaxarcha_zhengi_NC_030268	Anaxarcha_zhengi_NC_030268	double
3	NC_038116.1	Alpheus japonicus	Alpheus_japonicus_NC_038116_1	Malacostraca	Decapoda	Alpheidae	Alpheus	Arthropoda	F	H	16619	14773	-0.307	0.110897	35.6	29.5	22.7	12.2	65.1	34.9	41.7	0.094	-0.3	-0.094	0.3	Alpheus_japonicus_NC_038116_1	0.111078	5	2.492	Alpheus_japonicus_NC_038116	Alpheus_japonicus_NC_038116	double
3	NC_036343.1	Parapolybia crocea	Parapolybia_crocea_NC_036343_1	Insecta	Hymenoptera	Vespidae	Parapolybia	Arthropoda	F	H	16619	14661	-0.309	0.116252	43.4	39.6	11.1	5.9	83	17	45.5	0.046	-0.307	-0.046	0.307	Parapolybia_crocea_NC_036343_1	0.117817	5	4.313	Parapolybia_crocea_NC_036343	Parapolybia_crocea_NC_036343	double
3	NC_014680.1	Heteropteryx dilatata	Heteropteryx_dilatata_NC_014680_1	Insecta	Phasmatodea	Heteropterygidae	Heteropteryx	Arthropoda	F	H	16618	14621	-0.222	0.00138404	45.1	31	14.4	9.5	76.1	23.9	40.5	0.186	-0.205	-0.186	0.205	Heteropteryx_dilatata_NC_014680_1	0.120171	5	2.834	Heteropteryx_dilatata_NC_014680	Heteropteryx_dilatata_NC_014680	double
3	NC_034282.1	Rhombodera brachynota	Rhombodera_brachynota_NC_034282_1	Insecta	Mantodea	Mantidae	Rhombodera	Arthropoda	F	H	16616	14705	-0.218	0.0747472	39	35.8	15.2	10	74.8	25.2	45.8	0.043	-0.204	-0.043	0.204	Rhombodera_brachynota_NC_034282_1	0.11501	5	2.643	Rhombodera_brachynota_NC_034282	Rhombodera_brachynota_NC_034282	double
3	NC_027114.1	Galeruca daurica	Galeruca_daurica_NC_027114_1	Insecta	Coleoptera	Chrysomelidae	Galeruca	Arthropoda	F	H	16615	14534	-0.184	0.00343064	40.5	37.6	13.1	8.7	78.1	21.8	46.3	0.037	-0.201	-0.037	0.201	Galeruca_daurica_NC_027114_1	0.125248	5	2.675	Galeruca_daurica_NC_027114	Galeruca_daurica_NC_027114	double
3	NC_021417.1	Sogatella furcifera	Sogatella_furcifera_NC_021417_1	Insecta	Hemiptera	Delphacidae	Sogatella	Arthropoda	F	H	16612	14185	-0.168	0.0122803	41.6	34.6	13.6	10.2	76.2	23.8	44.8	0.093	-0.141	-0.093	0.141	Sogatella_furcifera_NC_021417_1	0.146099	5	3.901	Sogatella_furcifera_NC_021417	Sogatella_furcifera_NC_021417	double
3	NC_060415.1	Micromus paganus	Micromus_paganus_NC_060415_1	Insecta	Neuroptera	Hemerobiidae	Micromus	Arthropoda	F	H	16607	14707	-0.172	0.0340218	39.8	38.7	12.6	8.9	78.5	21.5	47.6	0.013	-0.173	-0.013	0.173	Micromus_paganus_NC_060415_1	0.11441	5	2.406	Micromus_paganus_NC_060415	Micromus_paganus_NC_060415	double
3	NC_011326.1	Priasilpha obscura	Priasilpha_obscura_NC_011326_1	Insecta	Coleoptera	Phloeostichidae	Priasilpha	Arthropoda	F	H	16603	14631	-0.236	0.0137325	40.3	36.2	14.9	8.6	76.5	23.5	44.8	0.052	-0.265	-0.052	0.265	Priasilpha_obscura_NC_011326_1	0.118774	5	2.615	Priasilpha_obscura_NC_011326	Priasilpha_obscura_NC_011326	double
3	NC_059870.1	Senotainia albifrons	Senotainia_albifrons_NC_059870_1	Insecta	Diptera	Tachinidae	Senotainia	Arthropoda	Parasitoid	H	16603	14712	-0.182	0.00445703	40.9	38.4	12.3	8.5	79.3	20.8	46.9	0.032	-0.186	-0.032	0.186	Senotainia_albifrons_NC_059870_1	0.113895	5	2.476	Senotainia_albifrons_NC_059870	Senotainia_albifrons_NC_059870	double
3	NC_034939.1	Nemoura nankinensis	Nemoura_nankinensis_NC_034939_1	Insecta	Plecoptera	Nemouridae	Nemoura	Arthropoda	F	H	16602	14779	-0.172	0.00433683	37.2	34	17	11.8	71.2	28.8	45.8	0.045	-0.181	-0.045	0.181	Nemoura_nankinensis_NC_034939_1	0.109806	5	2.526	Nemoura_nankinensis_NC_034939	Nemoura_nankinensis_NC_034939	double
3	NC_039652.1	Neolucanus maximus	Neolucanus_maximus_NC_039652_1	Insecta	Coleoptera	Lucanidae	Neolucanus	Arthropoda	F	H	16601	14512	-0.327	0.00289139	39	28.9	21.4	10.7	67.9	32.1	39.6	0.149	-0.332	-0.149	0.332	Neolucanus_maximus_NC_039652_1	0.125836	5	2.618	Neolucanus_maximus_NC_039652	Neolucanus_maximus_NC_039652	double
2	NC_035425.1	Maja squinado	Maja_squinado_NC_035425_1	Malacostraca	Decapoda	Majidae	Maja	Arthropoda	F	H	16598	14731	-0.236	0.111278	33.7	37.1	18.2	11	70.8	29.2	48.1	-0.047	-0.245	0.047	0.245	Maja_squinado_NC_035425_1	0.112483	5	2.697	Maja_squinado_NC_035425	Maja_squinado_NC_035425	double
6	NC_060631.1	Dardanus arrosor	Dardanus_arrosor_NC_060631_1	Malacostraca	Decapoda	Diogenidae	Dardanus	Arthropoda	F	H	16592	14889	-0.029	0.102519	33.3	34.6	16.4	15.7	67.9	32.1	50.3	-0.018	-0.023	0.018	0.023	Dardanus_arrosor_NC_060631_1	0.10264	5	2.63	Dardanus_arrosor_NC_060631	Dardanus_arrosor_NC_060631	double
2	NC_035424.1	Maja crispata	Maja_crispata_NC_035424_1	Malacostraca	Decapoda	Majidae	Maja	Arthropoda	F	H	16592	14729	-0.237	0.109511	33.6	36.7	18.6	11.1	70.3	29.7	47.8	-0.044	-0.25	0.044	0.25	Maja_crispata_NC_035424_1	0.112283	5	2.7	Maja_crispata_NC_035424	Maja_crispata_NC_035424	double
3	NC_044961.1	Lucanus fortunei	Lucanus_fortunei_NC_044961_1	Insecta	Coleoptera	Lucanidae	Lucanus	Arthropoda	F	H	16591	14488	-0.372	0.00295341	37.9	28.3	23.2	10.6	66.2	33.8	38.9	0.145	-0.374	-0.145	0.374	Lucanus_fortunei_NC_044961_1	0.126755	5	2.661	Lucanus_fortunei_NC_044961	Lucanus_fortunei_NC_044961	double
3	NC_040987.1	Euphausia superba	Euphausia_superba_NC_040987_1	Malacostraca	Euphausiacea	Euphausiidae	Euphausia	Arthropoda	F	H	16591	14704	-0.136	0.113736	34.3	34.6	17.6	13.5	68.9	31.1	48.1	-0.004	-0.134	0.004	0.134	Euphausia_superba_NC_040987_1	0.113736	5	2.371	Euphausia_superba_NC_040987	Euphausia_superba_NC_040987	double
3	NC_037926.1	Lygus pratensis	Lygus_pratensis_NC_037926_1	Insecta	Hemiptera	Miridae	Lygus	Arthropoda	F	H	16591	14556	-0.179	0.00108493	42.7	32.4	14.6	10.2	75.1	24.8	42.6	0.138	-0.178	-0.138	0.178	Lygus_pratensis_NC_037926_1	0.122657	5	2.856	Lygus_pratensis_NC_037926	Lygus_pratensis_NC_037926	double
3	NC_009501.1	Reticulitermes hageni	Reticulitermes_hageni_NC_009501_1	Insecta	Blattodea	Rhinotermitidae	Reticulitermes	Arthropoda	F	H	16590	14702	-0.285	0.00693189	42.6	22.9	22.2	12.3	65.5	34.5	35.2	0.3	-0.287	-0.3	0.287	Reticulitermes_hageni_NC_009501_1	0.113803	5	2.672	Reticulitermes_hageni_NC_009501	Reticulitermes_hageni_NC_009501	double
3	NC_028059.1	Cyphoderris monstrosa	Cyphoderris_monstrosa_NC_028059_1	Insecta	Orthoptera	Prophalangopsidae	Cyphoderris	Arthropoda	F	H	16590	14776	-0.296	0.0377336	39.7	31.8	18.5	9.8	71.5	28.3	41.6	0.11	-0.306	-0.11	0.306	Cyphoderris_monstrosa_NC_028059_1	0.109343	5	2.307	Cyphoderris_monstrosa_NC_028059	Cyphoderris_monstrosa_NC_028059	double
3	NC_039667.1	Ornebius kanetataki	Ornebius_kanetataki_NC_039667_1	Insecta	Orthoptera	Mogoplistidae	Ornebius	Arthropoda	F	H	16589	14701	-0.334	0.0102478	37	37.3	17.2	8.5	74.3	25.7	45.8	-0.004	-0.338	0.004	0.338	Ornebius_kanetataki_NC_039667_1	0.11381	5	2.512	Ornebius_kanetataki_NC_039667	Ornebius_kanetataki_NC_039667	double
3	NC_020144.1	Urochela quadrinotata	Urochela_quadrinotata_NC_020144_1	Insecta	Hemiptera	Urostylididae	Urochela	Arthropoda	F	H	16587	14112	-0.174	0.0104299	40.3	35.1	14.7	9.8	75.4	24.5	44.9	0.069	-0.199	-0.069	0.199	Urochela_quadrinotata_NC_020144_1	0.149213	5	3.235	Urochela_quadrinotata_NC_020144	Urochela_quadrinotata_NC_020144	double
3	NC_059851.1	Oestrus ovis	Oestrus_ovis_NC_059851_1	Insecta	Diptera	Oestridae	Oestrus	Arthropoda	Parasitoid	H	16584	14734	-0.298	0.0151954	39.6	36.1	15.9	8.3	75.7	24.2	44.4	0.047	-0.314	-0.047	0.314	Oestrus_ovis_NC_059851_1	0.111553	5	2.657	Oestrus_ovis_NC_059851	Oestrus_ovis_NC_059851	double
3	NC_028612.1	Sphaeridium bipustulatum	Sphaeridium_bipustulatum_NC_028612_1	Insecta	Coleoptera	Hydrophilidae	Sphaeridium	Arthropoda	F	H	16576	14474	-0.206	0.00935087	38.7	36.8	15	9.5	75.5	24.5	46.3	0.025	-0.224	-0.025	0.224	Sphaeridium_bipustulatum_NC_028612_1	0.12681	5	2.485	Sphaeridium_bipustulatum_NC_028612	Sphaeridium_bipustulatum_NC_028612	double
3	NC_036104.1	Aethina tumida	Aethina_tumida_NC_036104_1	Insecta	Coleoptera	Nitidulidae	Aethina	Arthropoda	F	H	16576	14597	-0.214	0.119389	39.8	37.1	14.1	9	76.9	23.1	46.1	0.034	-0.223	-0.034	0.223	Aethina_tumida_NC_036104_1	0.119389	5	2.603	Aethina_tumida_NC_036104	Aethina_tumida_NC_036104	double
3	NC_035883.1	Apis mellifera sahariensis	Apis_mellifera_sahariensis_NC_035883_1	Insecta	Hymenoptera	Apidae	Apis	Arthropoda	F	H	16569	14306	0.252	0.0623453	41.6	43.2	5.6	9.6	84.8	15.2	52.8	-0.02	0.266	0.02	-0.266	Apis_mellifera_sahariensis_NC_035883_1	0.13658	5	4.602	Apis_mellifera_sahariensis_NC_035883	Apis_mellifera_sahariensis_NC_035883	double
3	NC_009499.1	Reticulitermes santonensis	Reticulitermes_santonensis_NC_009499_1	Insecta	Blattodea	Rhinotermitidae	Reticulitermes	Arthropoda	F	H	16567	14692	-0.292	0.00682079	43.1	23	21.9	12	66.1	33.9	35	0.303	-0.293	-0.303	0.293	Reticulitermes_santonensis_NC_009499_1	0.113177	5	2.662	Reticulitermes_santonensis_NC_009499	Reticulitermes_santonensis_NC_009499	double
3	NC_009498.1	Reticulitermes flavipes	Reticulitermes_flavipes_NC_009498_1	Insecta	Blattodea	Rhinotermitidae	Reticulitermes	Arthropoda	F	H	16565	14691	-0.292	0.00688198	43	23.2	21.8	12	66.2	33.8	35.2	0.3	-0.292	-0.3	0.292	Reticulitermes_flavipes_NC_009498_1	0.11313	5	2.662	Reticulitermes_flavipes_NC_009498	Reticulitermes_flavipes_NC_009498	double
3	NC_042180.1	Sogatella vibix	Sogatella_vibix_NC_042180_1	Insecta	Hemiptera	Delphacidae	Sogatella	Arthropoda	F	H	16554	14206	-0.18	0.0109339	41.8	34.3	13.9	10.1	76.1	24	44.4	0.098	-0.156	-0.098	0.156	Sogatella_vibix_NC_042180_1	0.141839	5	3.866	Sogatella_vibix_NC_042180	Sogatella_vibix_NC_042180	double
3	NC_039710.1	Ophraella communa	Ophraella_communa_NC_039710_1	Insecta	Coleoptera	Chrysomelidae	Ophraella	Arthropoda	F	H	16553	14532	-0.164	0.00368513	41.2	36.2	13.3	9.3	77.4	22.6	45.5	0.065	-0.178	-0.065	0.178	Ophraella_communa_NC_039710_1	0.122093	5	2.714	Ophraella_communa_NC_039710	Ophraella_communa_NC_039710	double
3	NC_045929.1	Argopistes tsekooni	Argopistes_tsekooni_NC_045929_1	Insecta	Coleoptera	Chrysomelidae	Argopistes	Arthropoda	F	H	16552	14476	-0.18	0.00338328	41.5	38	12.2	8.3	79.5	20.5	46.3	0.044	-0.187	-0.044	0.187	Argopistes_tsekooni_NC_045929_1	0.125423	5	2.749	Argopistes_tsekooni_NC_045929	Argopistes_tsekooni_NC_045929	double
3	NC_020373.1	Dolycoris baccarum	Dolycoris_baccarum_NC_020373_1	Insecta	Hemiptera	Pentatomidae	Dolycoris	Arthropoda	F	H	16549	14566	-0.151	0.00622394	41.8	31.5	15.4	11.3	73.3	26.7	42.8	0.14	-0.153	-0.14	0.153	Dolycoris_baccarum_NC_020373_1	0.119826	5	3.015	Dolycoris_baccarum_NC_020373	Dolycoris_baccarum_NC_020373	double
3	NC_046825.1	Sinolapotamon patellifer	Sinolapotamon_patellifer_NC_046825_1	Malacostraca	Decapoda	Potamidae	Sinolapotamon	Arthropoda	F	H	16547	14745	-0.257	0.108841	36.4	39.9	15.1	8.6	76.3	23.7	48.5	-0.046	-0.275	0.046	0.275	Sinolapotamon_patellifer_NC_046825_1	0.108902	5	2.771	Sinolapotamon_patellifer_NC_046825	Sinolapotamon_patellifer_NC_046825	double
3	NC_050852.1	Omosita colon	Omosita_colon_NC_050852_1	Insecta	Coleoptera	Nitidulidae	Omosita	Arthropoda	F	H	16544	14631	-0.174	0.0766441	40.8	38.5	11.8	8.3	79.3	20.1	46.8	0.029	-0.178	-0.029	0.178	Omosita_colon_NC_050852_1	0.115631	5	2.619	Omosita_colon_NC_050852	Omosita_colon_NC_050852	double
3	NC_018129.1	Drepanotermes sp. SLC-2012	Drepanotermes_sp__SLC_2012_NC_018129_1	Insecta	Blattodea	Termitidae	Drepanotermes	Arthropoda	F	H	16542	14776	-0.266	0.00538024	42.4	24.8	20.8	12	67.2	32.8	36.8	0.263	-0.267	-0.263	0.267	Drepanotermes_sp__SLC_2012_NC_018129_1	0.106759	5	2.747	Drepanotermes_sp__SLC_2012_NC_018129	Drepanotermes_sp__SLC_2012_NC_018129	double
3	NC_052904.1	Ochthebius sculptoides	Ochthebius_sculptoides_NC_052904_1	Insecta	Coleoptera	Hydraenidae	Ochthebius	Arthropoda	F	I	16541	14581	-0.159	0.0545916	40.9	39.1	11.7	8.3	80	20	47.4	0.022	-0.167	-0.022	0.167	Ochthebius_sculptoides_NC_052904_1	0.118493	5	2.5	Ochthebius_sculptoides_NC_052904	Ochthebius_sculptoides_NC_052904	double
3	NC_038115.1	Popillia japonica	Popillia_japonica_NC_038115_1	Insecta	Coleoptera	Scarabaeidae	Popillia	Arthropoda	F	H	16541	14638	-0.206	0.00229732	39	36.7	14.8	9.5	75.7	24.3	46.2	0.03	-0.217	-0.03	0.217	Popillia_japonica_NC_038115_1	0.115047	5	2.522	Popillia_japonica_NC_038115	Popillia_japonica_NC_038115	double
4	NC_057478.1	Longpotamon depressum	Longpotamon_depressum_NC_057478_1	Malacostraca	Decapoda	Potamidae	Longpotamon	Arthropoda	F	H	16537	14632	-0.278	0.110298	35.4	37.9	17.3	9.3	73.3	26.6	47.2	-0.034	-0.302	0.034	0.302	Longpotamon_depressum_NC_057478_1	0.115196	5	2.842	Longpotamon_depressum_NC_057478	Longpotamon_depressum_NC_057478	double
3	NC_017748.1	Extatosoma tiaratum	Extatosoma_tiaratum_NC_017748_1	Insecta	Phasmatodea	Phasmatidae	Extatosoma	Arthropoda	F	H	16537	14602	-0.263	0.00187458	45.6	30.3	15.1	8.9	75.9	24	39.2	0.202	-0.257	-0.202	0.257	Extatosoma_tiaratum_NC_017748_1	0.11701	5	2.839	Extatosoma_tiaratum_NC_017748	Extatosoma_tiaratum_NC_017748	double
3	NC_052851.1	Felderimyia fuscipennis	Felderimyia_fuscipennis_NC_052851_1	Insecta	Diptera	Tephritidae	Felderimyia	Arthropoda	F	H	16536	14732	-0.258	0.0103411	38.2	34	17.5	10.3	72.2	27.8	44.3	0.06	-0.259	-0.06	0.259	Felderimyia_fuscipennis_NC_052851_1	0.109095	5	2.414	Felderimyia_fuscipennis_NC_052851	Felderimyia_fuscipennis_NC_052851	double
3	NC_036717.1	Ectropis obliqua	Ectropis_obliqua_NC_036717_1	Insecta	Lepidoptera	Geometridae	Ectropis	Arthropoda	F	H	16535	14815	-0.183	0.103538	41.4	39.9	11.1	7.6	81.3	18.7	47.5	0.019	-0.185	-0.019	0.185	Ectropis_obliqua_NC_036717_1	0.104022	5	2.618	Ectropis_obliqua_NC_036717	Ectropis_obliqua_NC_036717	double
3	NC_045882.1	Rhinoestrus usbekistanicus	Rhinoestrus_usbekistanicus_NC_045882_1	Insecta	Diptera	Oestridae	Rhinoestrus	Arthropoda	Parasitoid	H	16534	14727	-0.273	0.00629007	40.4	36.6	14.7	8.2	77	22.9	44.8	0.049	-0.284	-0.049	0.284	Rhinoestrus_usbekistanicus_NC_045882_1	0.10929	5	2.654	Rhinoestrus_usbekistanicus_NC_045882	Rhinoestrus_usbekistanicus_NC_045882	double
3	NC_050313.1	Elodes minuta	Elodes_minuta_NC_050313_1	Insecta	Coleoptera	Scirtidae	Elodes	Arthropoda	F	H	16532	14598	-0.231	0.116985	41	35.4	14.6	8.9	76.4	23.5	44.3	0.074	-0.241	-0.074	0.241	Elodes_minuta_NC_050313_1	0.116985	5	2.413	Elodes_minuta_NC_050313	Elodes_minuta_NC_050313	double
3	NC_054190.1	Syrphus ribesii	Syrphus_ribesii_NC_054190_1	Insecta	Diptera	Syrphidae	Syrphus	Arthropoda	F	H	16530	14790	-0.124	0.0150635	40.7	40.4	10.7	8.3	81.1	19	48.7	0.003	-0.127	-0.003	0.127	Syrphus_ribesii_NC_054190_1	0.105263	5	2.456	Syrphus_ribesii_NC_054190	Syrphus_ribesii_NC_054190	double
3	NC_050875.1	Triceratopyga calliphoroides	Triceratopyga_calliphoroides_NC_050875_1	Insecta	Diptera	Calliphoridae	Triceratopyga	Arthropoda	F	H	16529	14788	-0.159	0.0418053	39.3	37.9	13.3	9.5	77.2	22.8	47.4	0.019	-0.166	-0.019	0.166	Triceratopyga_calliphoroides_NC_050875_1	0.10533	5	2.434	Triceratopyga_calliphoroides_NC_050875	Triceratopyga_calliphoroides_NC_050875	double
3	NC_045094.1	Harpalus sinicus	Harpalus_sinicus_NC_045094_1	Insecta	Coleoptera	Carabidae	Harpalus	Arthropoda	F	H	16521	14780	-0.134	0.00544761	41.2	39.4	10.9	8.5	80.6	19.4	47.9	0.023	-0.127	-0.023	0.127	Harpalus_sinicus_NC_045094_1	0.105381	5	2.36	Harpalus_sinicus_NC_045094	Harpalus_sinicus_NC_045094	double
3	NC_012456.1	Hydaropsis longirostris	Hydaropsis_longirostris_NC_012456_1	Insecta	Hemiptera	Coreidae	Hydaropsis	Arthropoda	F	H	16521	14495	-0.216	0.00211852	41.6	33.9	15.4	9.2	75.5	24.6	43.1	0.102	-0.253	-0.102	0.253	Hydaropsis_longirostris_NC_012456_1	0.122632	5	2.93	Hydaropsis_longirostris_NC_012456	Hydaropsis_longirostris_NC_012456	double
4	NC_032061.1	Armillifer agkistrodontis	Armillifer_agkistrodontis_NC_032061_1	Ichthyostraca	Porocephalida	Armilliferidae	Armillifer	Arthropoda	EndoP	L	16521	13702	-0.588	0.00302645	34.2	31	27.4	7.4	65.2	34.8	38.4	0.049	-0.575	-0.049	0.575	Armillifer_agkistrodontis_NC_032061_1	0.170631	5	5.311	Armillifer_agkistrodontis_NC_032061	Armillifer_agkistrodontis_NC_032061	double
5	NC_039706.1	Abscondita anceyi	Abscondita_anceyi_NC_039706_1	Insecta	Coleoptera	Lampyridae	Abscondita	Arthropoda	F	H	16519	14509	-0.165	0.0059931	43.8	36	11.8	8.4	79.8	20.2	44.4	0.097	-0.171	-0.097	0.171	Abscondita_anceyi_NC_039706_1	0.121678	5	2.753	Abscondita_anceyi_NC_039706	Abscondita_anceyi_NC_039706	double
3	NC_013272.1	Halyomorpha halys	Halyomorpha_halys_NC_013272_1	Insecta	Hemiptera	Pentatomidae	Halyomorpha	Arthropoda	F	H	16518	14584	-0.15	0.00720426	43.1	33.3	13.6	10.1	76.4	23.7	43.4	0.128	-0.149	-0.128	0.149	Halyomorpha_halys_NC_013272_1	0.117084	5	3.087	Halyomorpha_halys_NC_013272	Halyomorpha_halys_NC_013272	double
3	NC_009500.1	Reticulitermes virginicus	Reticulitermes_virginicus_NC_009500_1	Insecta	Blattodea	Rhinotermitidae	Reticulitermes	Arthropoda	F	H	16513	14694	-0.292	0.00720644	42.8	23.1	22.1	12	65.9	34.1	35.1	0.298	-0.294	-0.298	0.294	Reticulitermes_virginicus_NC_009500_1	0.110156	5	2.665	Reticulitermes_virginicus_NC_009500	Reticulitermes_virginicus_NC_009500	double
3	NC_013706.1	Laodelphax striatellus	Laodelphax_striatellus_NC_013706_1	Insecta	Hemiptera	Delphacidae	Laodelphax	Arthropoda	F	H	16513	14342	-0.23	0.00793314	43.2	34	13.5	9.3	77.2	22.8	43.3	0.119	-0.183	-0.119	0.183	Laodelphax_striatellus_NC_013706_1	0.131472	5	3.806	Laodelphax_striatellus_NC_013706	Laodelphax_striatellus_NC_013706	double
3	NC_042438.1	Dysdercus decussatus	Dysdercus_decussatus_NC_042438_1	Insecta	Hemiptera	Pyrrhocoridae	Dysdercus	Arthropoda	F	H	16513	14538	-0.181	0.00841761	45.2	32.5	13.5	8.9	77.7	22.4	41.4	0.163	-0.205	-0.163	0.205	Dysdercus_decussatus_NC_042438_1	0.119603	5	3.083	Dysdercus_decussatus_NC_042438	Dysdercus_decussatus_NC_042438	double
3	NC_052888.1	Ochthebius quadricollis	Ochthebius_quadricollis_NC_052888_1	Insecta	Coleoptera	Hydraenidae	Ochthebius	Arthropoda	F	I	16510	14547	-0.131	0.00763174	42.4	39	10.7	8	81.4	18.7	47	0.042	-0.146	-0.042	0.146	Ochthebius_quadricollis_NC_052888_1	0.118898	5	2.446	Ochthebius_quadricollis_NC_052888	Ochthebius_quadricollis_NC_052888	double
3	NC_030341.1	Chrysoperla externa	Chrysoperla_externa_NC_030341_1	Insecta	Neuroptera	Chrysopidae	Chrysoperla	Arthropoda	F	H	16509	14664	-0.107	0.0236235	38.9	39.9	11.9	9.4	78.8	21.3	49.3	-0.013	-0.118	0.013	0.118	Chrysoperla_externa_NC_030341_1	0.111757	5	2.368	Chrysoperla_externa_NC_030341	Chrysoperla_externa_NC_030341	double
3	NC_014673.1	Micadina phluctainoides	Micadina_phluctainoides_NC_014673_1	Insecta	Phasmatodea	Lonchodidae	Micadina	Arthropoda	F	H	16507	14579	-0.124	0.00520991	45.7	32.7	11.8	9.7	78.4	21.5	42.4	0.165	-0.098	-0.165	0.098	Micadina_phluctainoides_NC_014673_1	0.116799	5	2.882	Micadina_phluctainoides_NC_014673	Micadina_phluctainoides_NC_014673	double
3	NC_037752.1	Paroster microsturtensis	Paroster_microsturtensis_NC_037752_1	Insecta	Coleoptera	Dytiscidae	Paroster	Arthropoda	F	H	16504	14715	-0.219	0.0183592	39.6	36.9	14.3	9.2	76.5	23.5	46.1	0.036	-0.221	-0.036	0.221	Paroster_microsturtensis_NC_037752_1	0.108398	5	2.454	Paroster_microsturtensis_NC_037752	Paroster_microsturtensis_NC_037752	double
6	NC_025776.1	Clibanarius infraspinatus	Clibanarius_infraspinatus_NC_025776_1	Malacostraca	Decapoda	Diogenidae	Clibanarius	Arthropoda	F	H	16504	14765	-0.204	0.105187	35.4	32.5	19.2	12.8	67.9	32	45.3	0.042	-0.199	-0.042	0.199	Clibanarius_infraspinatus_NC_025776_1	0.105368	5	2.619	Clibanarius_infraspinatus_NC_025776	Clibanarius_infraspinatus_NC_025776	double
3	NC_042432.1	Physopelta slanbuschii	Physopelta_slanbuschii_NC_042432_1	Insecta	Hemiptera	Largidae	Physopelta	Arthropoda	F	H	16502	14400	-0.177	0.0163617	43.6	29.8	16	10.5	73.4	26.5	40.3	0.187	-0.206	-0.187	0.206	Physopelta_slanbuschii_NC_042432_1	0.127379	5	3.032	Physopelta_slanbuschii_NC_042432	Physopelta_slanbuschii_NC_042432	double
3	NC_050311.1	Potamophylax latipennis	Potamophylax_latipennis_NC_050311_1	Insecta	Trichoptera	Limnephilidae	Potamophylax	Arthropoda	F	H	16502	14741	-0.36	0.106169	39.3	35.5	16.9	8.1	74.8	25	43.6	0.051	-0.351	-0.051	0.351	Potamophylax_latipennis_NC_050311_1	0.106714	5	2.992	Potamophylax_latipennis_NC_050311	Potamophylax_latipennis_NC_050311	double
3	NC_054157.1	Eutrichosiphum pasaniae	Eutrichosiphum_pasaniae_NC_054157_1	Insecta	Hemiptera	Aphididae	Eutrichosiphum	Arthropoda	F	I	16500	14431	-0.246	0.125333	46.6	38.9	9.1	5.5	85.5	14.6	44.4	0.089	-0.247	-0.089	0.247	Eutrichosiphum_pasaniae_NC_054157_1	0.125394	5	3.988	Eutrichosiphum_pasaniae_NC_054157	Eutrichosiphum_pasaniae_NC_054157	double
3	NC_025948.1	Prays oleae	Prays_oleae_NC_025948_1	Insecta	Lepidoptera	Praydidae	Prays	Arthropoda	F	H	16499	14758	-0.175	0.00793988	41.7	40.1	10.7	7.5	81.8	18.2	47.6	0.019	-0.179	-0.019	0.179	Prays_oleae_NC_025948_1	0.105522	5	2.543	Prays_oleae_NC_025948	Prays_oleae_NC_025948	double
3	NC_047464.1	Paraahimia luodianensis	Paraahimia_luodianensis_NC_047464_1	Insecta	Hemiptera	Cicadellidae	Paraahimia	Arthropoda	F	H	16497	14202	-0.174	0.00618294	46.2	33.8	11.6	8.4	80	20	42.2	0.155	-0.162	-0.155	0.162	Paraahimia_luodianensis_NC_047464_1	0.139116	5	3.445	Paraahimia_luodianensis_NC_047464	Paraahimia_luodianensis_NC_047464	double
3	NC_039427.1	Populicerus populi	Populicerus_populi_NC_039427_1	Insecta	Hemiptera	Cicadellidae	Populicerus	Arthropoda	F	H	16494	14270	-0.075	0.00097005	41.5	35.7	11.9	10.9	77.2	22.8	46.6	0.074	-0.044	-0.074	0.044	Populicerus_populi_NC_039427_1	0.134837	5	3.244	Populicerus_populi_NC_039427	Populicerus_populi_NC_039427	double
3	NC_053543.1	Svistella anhuiensis	Svistella_anhuiensis_NC_053543_1	Insecta	Orthoptera	Gryllidae	Svistella	Arthropoda	F	H	16494	14728	-0.363	0.0212198	39.1	34.7	17.7	8.5	73.8	26.2	43.2	0.06	-0.351	-0.06	0.351	Svistella_anhuiensis_NC_053543_1	0.107069	5	2.61	Svistella_anhuiensis_NC_053543	Svistella_anhuiensis_NC_053543	double
3	NC_020773.1	Tristira magellanica	Tristira_magellanica_NC_020773_1	Insecta	Orthoptera	Tristiridae	Tristira	Arthropoda	F	H	16494	14763	-0.172	0.0450467	41.7	32.8	14.9	10.5	74.5	25.4	43.3	0.12	-0.174	-0.12	0.174	Tristira_magellanica_NC_020773_1	0.104947	5	2.685	Tristira_magellanica_NC_020773	Tristira_magellanica_NC_020773	double
3	NC_026710.1	Phallocryptus tserensodnomi	Phallocryptus_tserensodnomi_NC_026710_1	Branchiopoda	Anostraca		Phallocryptus	Arthropoda	F	H	16493	13873	-0.064	0.158795	33.2	32.2	18.3	16.3	65.4	34.6	48.5	0.016	-0.056	-0.016	0.056	Phallocryptus_tserensodnomi_NC_026710_1	0.158855	5	2.992	Phallocryptus_tserensodnomi_NC_026710	Phallocryptus_tserensodnomi_NC_026710	double
3	NC_026113.1	Isognathotermes ugandensis	Isognathotermes_ugandensis_NC_026113_1	Insecta	Blattodea	Termitidae	Isognathotermes	Arthropoda	F	H	16491	14830	-0.26	0.0382633	42.8	25.6	20	11.7	68.4	31.7	37.3	0.251	-0.263	-0.251	0.263	Isognathotermes_ugandensis_NC_026113_1	0.100722	5	2.755	Isognathotermes_ugandensis_NC_026113	Isognathotermes_ugandensis_NC_026113	double
3	NC_031162.1	Reticulitermes flaviceps	Reticulitermes_flaviceps_NC_031162_1	Insecta	Blattodea	Rhinotermitidae	Reticulitermes	Arthropoda	F	H	16485	14687	-0.275	0.00734001	42.7	23.6	21.5	12.1	66.3	33.6	35.7	0.287	-0.279	-0.287	0.279	Reticulitermes_flaviceps_NC_031162_1	0.109069	5	2.661	Reticulitermes_flaviceps_NC_031162	Reticulitermes_flaviceps_NC_031162	double
3	NC_042202.1	Erthesina fullo	Erthesina_fullo_NC_042202_1	Insecta	Hemiptera	Pentatomidae	Erthesina	Arthropoda	F	H	16485	14563	-0.194	0.00370033	44	31.4	14.7	9.9	75.4	24.6	41.3	0.166	-0.198	-0.166	0.198	Erthesina_fullo_NC_042202_1	0.115074	5	2.99	Erthesina_fullo_NC_042202	Erthesina_fullo_NC_042202	double
3	NC_030360.1	Aneurus similis	Aneurus_similis_NC_030360_1	Insecta	Hemiptera	Aradidae	Aneurus	Arthropoda	F	I	16477	14376	-0.27	0.12478	41.2	26.8	20.4	11.6	68	32	38.4	0.211	-0.274	-0.211	0.274	Aneurus_similis_NC_030360_1	0.127511	5	3.142	Aneurus_similis_NC_030360	Aneurus_similis_NC_030360	double
3	NC_037746.1	Reduvius gregoryi	Reduvius_gregoryi_NC_037746_1	Insecta	Hemiptera	Reduviidae	Reduvius	Arthropoda	F	H	16477	14507	-0.247	0.0145051	42.2	28.9	18.2	10.7	71.1	28.9	39.6	0.188	-0.258	-0.188	0.258	Reduvius_gregoryi_NC_037746_1	0.119561	5	2.945	Reduvius_gregoryi_NC_037746	Reduvius_gregoryi_NC_037746	double
3	NC_041657.1	Palesisa nudioculata	Palesisa_nudioculata_NC_041657_1	Insecta	Diptera	Tachinidae	Palesisa	Arthropoda	Parasitoid	H	16476	14675	-0.147	0.00922554	41	39.4	11.3	8.3	80.4	19.6	47.7	0.02	-0.153	-0.02	0.153	Palesisa_nudioculata_NC_041657_1	0.109311	5	2.555	Palesisa_nudioculata_NC_041657	Palesisa_nudioculata_NC_041657	double
3	NC_004454.2	Varroa destructor	Varroa_destructor_NC_004454_2	Arachnida	Mesostigmata	Varroidae	Varroa	Arthropoda	EctoP	L	16476	13669	0.18	0.170005	39.2	40.9	8.2	11.8	80.1	20	52.7	-0.021	0.178	0.021	-0.178	Varroa_destructor_NC_004454_2	0.170369	5	4.444	Varroa_destructor_NC_004454	Varroa_destructor_NC_004454	double
3	NC_026695.1	Reticulitermes aculabialis	Reticulitermes_aculabialis_NC_026695_1	Insecta	Blattodea	Rhinotermitidae	Reticulitermes	Arthropoda	F	H	16475	14688	-0.284	0.00655539	42.8	23	22	12.2	65.8	34.2	35.2	0.3	-0.287	-0.3	0.287	Reticulitermes_aculabialis_NC_026695_1	0.108467	5	2.675	Reticulitermes_aculabialis_NC_026695	Reticulitermes_aculabialis_NC_026695	double
8	NC_039535.1	Trichogramma ostriniae	Trichogramma_ostriniae_NC_039535_1	Insecta	Hymenoptera	Trichogrammatidae	Trichogramma	Arthropoda	Parasitoid	I	16472	14669	0.163	0.109398	38.4	47	6.2	8.4	85.4	14.6	55.4	-0.101	0.154	0.101	-0.154	Trichogramma_ostriniae_NC_039535_1	0.109458	5	4.176	Trichogramma_ostriniae_NC_039535	Trichogramma_ostriniae_NC_039535	double
3	NC_018549.1	Blattella bisignata	Blattella_bisignata_NC_018549_1	Insecta	Blattodea	Ectobiidae	Blattella	Arthropoda	F	H	16470	14668	-0.183	0.0058895	39.1	35.1	15.5	10.4	74.2	25.9	45.5	0.053	-0.196	-0.053	0.196	Blattella_bisignata_NC_018549_1	0.109411	5	2.433	Blattella_bisignata_NC_018549	Blattella_bisignata_NC_018549	double
3	NC_015842.1	Agriosphodrus dohrni	Agriosphodrus_dohrni_NC_015842_1	Insecta	Hemiptera	Reduviidae	Agriosphodrus	Arthropoda	F	H	16470	14566	-0.112	0.015847	39	33.2	15.6	12.2	72.2	27.8	45.4	0.08	-0.123	-0.08	0.123	Agriosphodrus_dohrni_NC_015842_1	0.115604	5	3.042	Agriosphodrus_dohrni_NC_015842	Agriosphodrus_dohrni_NC_015842	double
3	NC_028541.1	Limonius californicus	Limonius_californicus_NC_028541_1	Insecta	Coleoptera	Elateridae	Limonius	Arthropoda	F	H	16467	14572	0.294	0.0316998	30.8	39.6	10.4	19.2	70.4	29.6	58.8	-0.125	0.297	0.125	-0.297	Limonius_californicus_NC_028541_1	0.115079	5	2.536	Limonius_californicus_NC_028541	Limonius_californicus_NC_028541	double
3	NC_044708.1	Tricentrus brunneus	Tricentrus_brunneus_NC_044708_1	Insecta	Hemiptera	Membracidae	Tricentrus	Arthropoda	F	H	16467	14192	-0.157	0.000850185	44.5	34.1	12	9.3	78.6	21.3	43.4	0.132	-0.125	-0.132	0.125	Tricentrus_brunneus_NC_044708_1	0.138155	5	3.492	Tricentrus_brunneus_NC_044708	Tricentrus_brunneus_NC_044708	double
3	NC_030060.1	Bicellonychia lividipennis	Bicellonychia_lividipennis_NC_030060_1	Insecta	Coleoptera	Lampyridae	Bicellonychia	Arthropoda	F	H	16466	14532	-0.205	0.00929187	41.6	34.1	14.7	9.6	75.7	24.3	43.7	0.098	-0.209	-0.098	0.209	Bicellonychia_lividipennis_NC_030060_1	0.117454	5	2.776	Bicellonychia_lividipennis_NC_030060	Bicellonychia_lividipennis_NC_030060	double
3	NC_029354.1	Dixella aestivalis	Dixella_aestivalis_NC_029354_1	Insecta	Diptera	Dixidae	Dixella	Arthropoda	MP	H	16465	14780	-0.169	0.0122684	38.8	36.5	14.5	10.2	75.3	24.7	46.7	0.03	-0.174	-0.03	0.174	Dixella_aestivalis_NC_029354_1	0.102338	5	2.359	Dixella_aestivalis_NC_029354	Dixella_aestivalis_NC_029354	double
3	NC_012645.1	Ephemera orientalis	Ephemera_orientalis_NC_012645_1	Insecta	Ephemeroptera	Ephemeridae	Ephemera	Arthropoda	F	H	16463	14663	-0.238	0.00874689	37.2	35	17.4	10.3	72.2	27.7	45.3	0.03	-0.255	-0.03	0.255	Ephemera_orientalis_NC_012645_1	0.109336	5	2.494	Ephemera_orientalis_NC_012645	Ephemera_orientalis_NC_012645	double
3	NC_018339.1	Calosoma sp. BYU-CO241	Calosoma_sp__BYU_CO241_NC_018339_1	Insecta	Coleoptera	Carabidae	Calosoma	Arthropoda	F	H	16462	14807	-0.193	0.0105091	40.7	37.8	12.9	8.6	78.5	21.5	46.4	0.038	-0.197	-0.038	0.197	Calosoma_sp__BYU_CO241_NC_018339_1	0.100535	5	2.334	Calosoma_sp__BYU_CO241_NC_018339	Calosoma_sp__BYU_CO241_NC_018339	double
3	NC_042828.1	Oomorphoides metallicus	Oomorphoides_metallicus_NC_042828_1	Insecta	Coleoptera	Chrysomelidae	Oomorphoides	Arthropoda	F	H	16462	14540	-0.276	0.00206536	39.5	32.6	18	9.9	72.1	27.9	42.5	0.095	-0.292	-0.095	0.292	Oomorphoides_metallicus_NC_042828_1	0.116754	5	2.968	Oomorphoides_metallicus_NC_042828	Oomorphoides_metallicus_NC_042828	double
3	NC_026117.1	Termes hospes	Termes_hospes_NC_026117_1	Insecta	Blattodea	Termitidae	Termes	Arthropoda	F	H	16461	14788	-0.278	0.0481745	42.2	23.7	21.9	12.2	65.9	34.1	35.9	0.281	-0.286	-0.281	0.286	Termes_hospes_NC_026117_1	0.101634	5	2.796	Termes_hospes_NC_026117	Termes_hospes_NC_026117	double
3	NC_046479.1	Cephalopina titillator	Cephalopina_titillator_NC_046479_1	Insecta	Diptera	Oestridae	Cephalopina	Arthropoda	Parasitoid	H	16461	14729	-0.336	0.0159164	41	32.3	17.8	8.9	73.3	26.7	41.2	0.118	-0.336	-0.118	0.336	Cephalopina_titillator_NC_046479_1	0.105218	5	2.696	Cephalopina_titillator_NC_046479	Cephalopina_titillator_NC_046479	double
3	NC_014695.1	Phraortes illepidus	Phraortes_illepidus_NC_014695_1	Insecta	Phasmatodea	Lonchodidae	Phraortes	Arthropoda	F	H	16456	14527	-0.176	0.00157997	45.7	31.9	13.1	9.3	77.6	22.4	41.2	0.178	-0.167	-0.178	0.167	Phraortes_illepidus_NC_014695_1	0.117222	5	2.785	Phraortes_illepidus_NC_014695	Phraortes_illepidus_NC_014695	double
7	NC_046027.1	Blattisocius tarsalis	Blattisocius_tarsalis_NC_046027_1	Arachnida	Mesostigmata	Blattisociidae	Blattisocius	Arthropoda	F	L	16454	13959	-0.489	0.120457	37.5	35	20	7.6	72.5	27.6	42.6	0.034	-0.451	-0.034	0.451	Blattisocius_tarsalis_NC_046027_1	0.151635	5	5.423	Blattisocius_tarsalis_NC_046027	Blattisocius_tarsalis_NC_046027	double
3	NC_013554.1	Adelium sp. NCS-2009	Adelium_sp__NCS_2009_NC_013554_1	Insecta	Coleoptera	Tenebrionidae	Adelium	Arthropoda	F	H	16449	14538	-0.218	0.0458387	41.3	31.4	16.7	10.6	72.7	27.3	42	0.137	-0.222	-0.137	0.222	Adelium_sp__NCS_2009_NC_013554_1	0.116177	5	2.619	Adelium_sp__NCS_2009_NC_013554	Adelium_sp__NCS_2009_NC_013554	double
3	NC_037181.1	Changeondelphax velitchkovskyi	Changeondelphax_velitchkovskyi_NC_037181_1	Insecta	Hemiptera	Delphacidae	Changeondelphax	Arthropoda	F	H	16449	14182	-0.286	0.0295459	42.8	32.9	15.4	8.8	75.7	24.2	41.7	0.13	-0.272	-0.13	0.272	Changeondelphax_velitchkovskyi_NC_037181_1	0.13782	5	3.78	Changeondelphax_velitchkovskyi_NC_037181	Changeondelphax_velitchkovskyi_NC_037181	double
9	NC_046743.1	Phyllodiaptomus tunguidus	Phyllodiaptomus_tunguidus_NC_046743_1	Hexanauplia	Calanoida	Diaptomidae	Phyllodiaptomus	Arthropoda	F	I	16446	14087	0.164	0.0650614	34.6	34.8	12.3	18.2	69.4	30.5	53	-0.003	0.194	0.003	-0.194	Phyllodiaptomus_tunguidus_NC_046743_1	0.143439	5	3.154	Phyllodiaptomus_tunguidus_NC_046743	Phyllodiaptomus_tunguidus_NC_046743	double
3	NC_028015.1	Polypedilum vanderplanki	Polypedilum_vanderplanki_NC_028015_1	Insecta	Diptera	Chironomidae	Polypedilum	Arthropoda	F	H	16445	14931	-0.238	0.0606263	40.9	38.8	12.7	7.6	79.7	20.3	46.4	0.027	-0.25	-0.027	0.25	Polypedilum_vanderplanki_NC_028015_1	0.0920645	5	2.491	Polypedilum_vanderplanki_NC_028015	Polypedilum_vanderplanki_NC_028015	double
3	NC_051932.1	Apis mellifera	Apis_mellifera_NC_051932_1	Insecta	Hymenoptera	Apidae	Apis	Arthropoda	F	H	16445	14676	-0.254	0.0582548	43.3	41.6	9.6	5.5	84.9	15.1	47.1	0.02	-0.269	-0.02	0.269	Apis_mellifera_NC_051932_1	0.107571	5	4.603	Apis_mellifera_NC_051932	Apis_mellifera_NC_051932	double
3	NC_056283.1	Syrphus torvus	Syrphus_torvus_NC_056283_1	Insecta	Diptera	Syrphidae	Syrphus	Arthropoda	F	H	16444	14811	-0.124	0.0154464	40.3	40.3	10.9	8.5	80.6	19.4	48.8	0	-0.124	0	0.124	Syrphus_torvus_NC_056283_1	0.0993067	5	2.459	Syrphus_torvus_NC_056283	Syrphus_torvus_NC_056283	double
3	NC_059034.1	Paratrichocladius tamaater	Paratrichocladius_tamaater_NC_059034_1	Insecta	Diptera	Chironomidae	Paratrichocladius	Arthropoda	F	H	16441	14881	-0.131	0.0183687	40.4	38.2	12.1	9.2	78.6	21.3	47.4	0.028	-0.136	-0.028	0.136	Paratrichocladius_tamaater_NC_059034_1	0.0183687	5	2.405	Paratrichocladius_tamaater_NC_059034	Paratrichocladius_tamaater_NC_059034	double
3	NC_054313.1	Coquillettidia linealis	Coquillettidia_linealis_NC_054313_1	Insecta	Diptera	Culicidae	Coquillettidia	Arthropoda	MP	H	16441	14791	-0.227	0.00535247	39.2	38	14.2	8.5	77.2	22.7	46.5	0.016	-0.249	-0.016	0.249	Coquillettidia_linealis_NC_054313_1	0.100359	5	2.513	Coquillettidia_linealis_NC_054313	Coquillettidia_linealis_NC_054313	double
3	NC_035714.1	Manticora tibialis	Manticora_tibialis_NC_035714_1	Insecta	Coleoptera	Carabidae	Manticora	Arthropoda	F	H	16439	14725	-0.24	0.0210475	39.2	34.9	16.1	9.8	74.1	25.9	44.7	0.058	-0.24	-0.058	0.24	Manticora_tibialis_NC_035714_1	0.104264	5	2.451	Manticora_tibialis_NC_035714	Manticora_tibialis_NC_035714	double
3	NC_046548.1	Ruidocollaris convexipennis	Ruidocollaris_convexipennis_NC_046548_1	Insecta	Orthoptera	Tettigoniidae	Ruidocollaris	Arthropoda	F	H	16437	14718	-0.32	0.0451421	36.7	36.4	17.9	9.1	73.1	27	45.5	0.004	-0.325	-0.004	0.325	Ruidocollaris_convexipennis_NC_046548_1	0.104581	5	2.548	Ruidocollaris_convexipennis_NC_046548	Ruidocollaris_convexipennis_NC_046548	double
3	NC_046048.1	Idiocerus salicis	Idiocerus_salicis_NC_046048_1	Insecta	Hemiptera	Cicadellidae	Idiocerus	Arthropoda	F	H	16436	14380	-0.062	0.116573	40.8	36.4	11.9	10.9	77.2	22.8	47.3	0.057	-0.045	-0.057	0.045	Idiocerus_salicis_NC_046048_1	0.125091	5	3.207	Idiocerus_salicis_NC_046048	Idiocerus_salicis_NC_046048	double
3	NC_042208.1	Etisus anaglyptus	Etisus_anaglyptus_NC_042208_1	Malacostraca	Decapoda	Xanthidae	Etisus	Arthropoda	F	H	16435	14728	-0.302	0.103864	33.2	34.8	21	11.1	68	32.1	45.9	-0.023	-0.309	0.023	0.309	Etisus_anaglyptus_NC_042208_1	0.103864	5	2.701	Etisus_anaglyptus_NC_042208	Etisus_anaglyptus_NC_042208	double
3	NC_046953.1	Harpalus pensylvanicus	Harpalus_pensylvanicus_NC_046953_1	Insecta	Coleoptera	Carabidae	Harpalus	Arthropoda	F	H	16434	14702	-0.166	0.095412	41.5	38.9	11.6	8.1	80.4	19.7	47	0.033	-0.177	-0.033	0.177	Harpalus_pensylvanicus_NC_046953_1	0.105391	5	2.372	Harpalus_pensylvanicus_NC_046953	Harpalus_pensylvanicus_NC_046953	double
3	NC_028601.1	Gabronthus thermarum	Gabronthus_thermarum_NC_028601_1	Insecta	Coleoptera	Staphylinidae	Gabronthus	Arthropoda	F	H	16434	14418	-0.246	0.0127784	39.9	35.8	15.4	8.9	75.7	24.3	44.7	0.054	-0.269	-0.054	0.269	Gabronthus_thermarum_NC_028601_1	0.122673	5	2.497	Gabronthus_thermarum_NC_028601	Gabronthus_thermarum_NC_028601	double
3	NC_042811.1	Mictis tenebrosa	Mictis_tenebrosa_NC_042811_1	Insecta	Hemiptera	Coreidae	Mictis	Arthropoda	F	H	16433	14558	-0.2	0.0037729	42.2	30.7	16.7	10.3	72.9	27	41	0.158	-0.237	-0.158	0.237	Mictis_tenebrosa_NC_042811_1	0.1141	5	2.953	Mictis_tenebrosa_NC_042811	Mictis_tenebrosa_NC_042811	double
3	NC_015607.1	Homarus americanus	Homarus_americanus_NC_015607_1	Malacostraca	Decapoda	Nephropidae	Homarus	Arthropoda	F	H	16432	14796	-0.208	0.0995618	34.4	35.1	18.3	12.1	69.5	30.4	47.2	-0.01	-0.204	0.01	0.204	Homarus_americanus_NC_015607_1	0.0995618	5	2.472	Homarus_americanus_NC_015607	Homarus_americanus_NC_015607	double
3	NC_035402.1	Typhlatya galapagensis	Typhlatya_galapagensis_NC_035402_1	Malacostraca	Decapoda	Atyidae	Typhlatya	Arthropoda	F	I	16430	14621	-0.312	0.110043	37.5	31.6	20.3	10.6	69.1	30.9	42.2	0.085	-0.315	-0.085	0.315	Typhlatya_galapagensis_NC_035402_1	0.110103	5	2.649	Typhlatya_galapagensis_NC_035402	Typhlatya_galapagensis_NC_035402	double
3	NC_059816.1	Desmomyia sinensis	Desmomyia_sinensis_NC_059816_1	Insecta	Diptera	Rhagionidae	Desmomyia	Arthropoda	F	H	16430	14700	-0.162	0.00925137	40	37.9	12.9	9.2	77.9	22.1	47.1	0.026	-0.168	-0.026	0.168	Desmomyia_sinensis_NC_059816_1	0.105295	5	2.292	Desmomyia_sinensis_NC_059816	Desmomyia_sinensis_NC_059816	double
3	NC_046045.1	Trachys auricollis	Trachys_auricollis_NC_046045_1	Insecta	Coleoptera	Buprestidae	Trachys	Arthropoda	F	H	16429	14458	-0.199	0.00754763	38.9	32.1	17.4	11.5	71	28.9	43.6	0.096	-0.203	-0.096	0.203	Trachys_auricollis_NC_046045_1	0.119971	5	2.577	Trachys_auricollis_NC_046045	Trachys_auricollis_NC_046045	double
3	NC_052694.1	Perkinsiella saccharicida	Perkinsiella_saccharicida_NC_052694_1	Insecta	Hemiptera	Delphacidae	Perkinsiella	Arthropoda	F	H	16429	14220	-0.259	0.0205734	43.8	34.7	13.4	8.1	78.5	21.5	42.8	0.115	-0.247	-0.115	0.247	Perkinsiella_saccharicida_NC_052694_1	0.134457	5	3.716	Perkinsiella_saccharicida_NC_052694	Perkinsiella_saccharicida_NC_052694	double
3	NC_034924.1	Spaniocelyphus pilosus	Spaniocelyphus_pilosus_NC_034924_1	Insecta	Diptera	Celyphidae	Spaniocelyphus	Arthropoda	F	H	16426	14773	-0.17	0.00681846	38.1	38.8	13.5	9.5	76.9	23	48.3	-0.009	-0.174	0.009	0.174	Spaniocelyphus_pilosus_NC_034924_1	0.100633	5	2.369	Spaniocelyphus_pilosus_NC_034924	Spaniocelyphus_pilosus_NC_034924	double
3	NC_028160.1	Ruidocollaris obscura	Ruidocollaris_obscura_NC_028160_1	Insecta	Orthoptera	Tettigoniidae	Ruidocollaris	Arthropoda	F	H	16424	14726	-0.321	0.0443254	37.1	36.4	17.6	9	73.5	26.6	45.4	0.011	-0.325	-0.011	0.325	Ruidocollaris_obscura_NC_028160_1	0.103385	5	2.493	Ruidocollaris_obscura_NC_028160	Ruidocollaris_obscura_NC_028160	double
3	NC_061037.1	Camponotus japonicus	Camponotus_japonicus_NC_061037_1	Insecta	Hymenoptera	Formicidae	Camponotus	Arthropoda	F	H	16422	14763	-0.383	0.0357447	39.1	38.8	15.6	6.6	77.9	22.2	45.4	0.004	-0.408	-0.004	0.408	Camponotus_japonicus_NC_061037_1	0.101023	5	4.175	Camponotus_japonicus_NC_061037	Camponotus_japonicus_NC_061037	double
3	NC_035146.2	Vespa velutina	Vespa_velutina_NC_035146_2	Insecta	Hymenoptera	Vespidae	Vespa	Arthropoda	F	H	16416	14942	-0.371	0.0867446	40.2	41.5	12.9	5.4	81.7	18.3	46.9	-0.015	-0.405	0.015	0.405	Vespa_velutina_NC_035146_2	0.0897904	5	4.178	Vespa_velutina_NC_035146	Vespa_velutina_NC_035146	double
3	NC_013257.1	Ditaxis biseriata	Ditaxis_biseriata_NC_013257_1	Insecta	Neuroptera	Mantispidae	Ditaxis	Arthropoda	F	H	16416	14722	-0.167	0.0120005	40.5	39.3	11.9	8.3	79.8	20.2	47.6	0.015	-0.179	-0.015	0.179	Ditaxis_biseriata_NC_013257_1	0.103192	5	2.329	Ditaxis_biseriata_NC_013257	Ditaxis_biseriata_NC_013257	double
3	NC_057485.1	Scyra compressipes	Scyra_compressipes_NC_057485_1	Malacostraca	Decapoda	Pisidae	Scyra	Arthropoda	F	I	16415	14702	-0.209	0.104295	34.7	39.7	15.3	10.2	74.4	25.5	49.9	-0.068	-0.2	0.068	0.2	Scyra_compressipes_NC_057485_1	0.104356	5	2.819	Scyra_compressipes_NC_057485	Scyra_compressipes_NC_057485	double
3	NC_053880.1	Parastratiosphecomyia szechuanensis	Parastratiosphecomyia_szechuanensis_NC_053880_1	Insecta	Diptera	Stratiomyidae	Parastratiosphecomyia	Arthropoda	F	H	16414	14764	-0.256	0.00865115	39	35.2	16.3	9.5	74.2	25.8	44.7	0.051	-0.265	-0.051	0.265	Parastratiosphecomyia_szechuanensis_NC_053880_1	0.100524	5	2.446	Parastratiosphecomyia_szechuanensis_NC_053880	Parastratiosphecomyia_szechuanensis_NC_053880	double
6	NC_045091.1	Birgus latro	Birgus_latro_NC_045091_1	Malacostraca	Decapoda	Coenobitidae	Birgus	Arthropoda	F	I	16411	14765	-0.232	0.100055	35	30.6	20.9	13.4	65.6	34.3	44	0.068	-0.218	-0.068	0.218	Birgus_latro_NC_045091_1	0.100299	5	2.591	Birgus_latro_NC_045091	Birgus_latro_NC_045091	double
3	NC_060730.1	Pochazia discreta	Pochazia_discreta_NC_060730_1	Insecta	Hemiptera	Ricaniidae	Pochazia	Arthropoda	F	H	16411	14258	-0.271	0.010237	47.6	26	16.6	9.7	73.6	26.3	35.7	0.293	-0.264	-0.293	0.264	Pochazia_discreta_NC_060730_1	0.131192	5	3.546	Pochazia_discreta_NC_060730	Pochazia_discreta_NC_060730	double
3	NC_059850.1	Cephenemyia stimulator	Cephenemyia_stimulator_NC_059850_1	Insecta	Diptera	Oestridae	Cephenemyia	Arthropoda	Parasitoid	H	16407	14743	-0.254	0.0103614	39.5	37.9	14.2	8.3	77.4	22.5	46.2	0.02	-0.261	-0.02	0.261	Cephenemyia_stimulator_NC_059850_1	0.10142	5	2.602	Cephenemyia_stimulator_NC_059850	Cephenemyia_stimulator_NC_059850	double
3	NC_054322.1	Tripteroides tasmaniensis	Tripteroides_tasmaniensis_NC_054322_1	Insecta	Diptera	Culicidae	Tripteroides	Arthropoda	MP	H	16403	14782	-0.211	0.011949	39.4	38.6	13.5	8.5	78	22	47.1	0.01	-0.226	-0.01	0.226	Tripteroides_tasmaniensis_NC_054322_1	0.0988234	5	2.52	Tripteroides_tasmaniensis_NC_054322	Tripteroides_tasmaniensis_NC_054322	double
3	NC_044776.1	Abscondita terminalis	Abscondita_terminalis_NC_044776_1	Insecta	Coleoptera	Lampyridae	Abscondita	Arthropoda	F	H	16402	14519	-0.177	0.114803	44.2	35.6	12	8.2	79.8	20.2	43.8	0.107	-0.185	-0.107	0.185	Abscondita_terminalis_NC_044776_1	0.114803	5	2.733	Abscondita_terminalis_NC_044776	Abscondita_terminalis_NC_044776	double
3	NC_042808.1	Eurygaster testudinaria	Eurygaster_testudinaria_NC_042808_1	Insecta	Hemiptera	Scutelleridae	Eurygaster	Arthropoda	F	H	16401	14565	-0.227	0.0276812	41.2	29.6	17.7	11.5	70.8	29.2	41.1	0.164	-0.214	-0.164	0.214	Eurygaster_testudinaria_NC_042808_1	0.111944	5	2.943	Eurygaster_testudinaria_NC_042808	Eurygaster_testudinaria_NC_042808	double
3	NC_058281.1	Curtos fulvocapitalis	Curtos_fulvocapitalis_NC_058281_1	Insecta	Coleoptera	Lampyridae	Curtos	Arthropoda	F	H	16398	14441	-0.181	0.0207342	42.2	38.8	11.2	7.7	81	18.9	46.5	0.041	-0.184	-0.041	0.184	Curtos_fulvocapitalis_NC_058281_1	0.119344	5	2.826	Curtos_fulvocapitalis_NC_058281	Curtos_fulvocapitalis_NC_058281	double
3	NC_040123.1	Tremex columba	Tremex_columba_NC_040123_1	Insecta	Hymenoptera	Siricidae	Tremex	Arthropoda	F	H	16397	14716	-0.396	0.0895896	38.1	43.6	12.8	5.5	81.7	18.3	49.1	-0.066	-0.402	0.066	0.402	Tremex_columba_NC_040123_1	0.102519	5	5.127	Tremex_columba_NC_040123	Tremex_columba_NC_040123	double
3	NC_046588.1	Scolytus seulensis	Scolytus_seulensis_NC_046588_1	Insecta	Coleoptera	Curculionidae	Scolytus	Arthropoda	F	H	16396	14144	0.235	0.13363	30.7	38.4	12.2	18.6	69.1	30.8	57	-0.111	0.208	0.111	-0.208	Scolytus_seulensis_NC_046588_1	0.237253	5	3.273	Scolytus_seulensis_NC_046588	Scolytus_seulensis_NC_046588	double
3	NC_057538.1	Hydrocolus stagnalis	Hydrocolus_stagnalis_NC_057538_1	Insecta	Coleoptera	Dytiscidae	Hydrocolus	Arthropoda	F	H	16396	14706	-0.202	0.0748353	41.8	37.5	12.3	8.4	79.3	20.7	45.9	0.053	-0.192	-0.053	0.192	Hydrocolus_stagnalis_NC_057538_1	0.103074	5	2.395	Hydrocolus_stagnalis_NC_057538	Hydrocolus_stagnalis_NC_057538	double
3	NC_008755.1	Trichophthalma punctata	Trichophthalma_punctata_NC_008755_1	Insecta	Diptera	Nemestrinidae	Trichophthalma	Arthropoda	MP	H	16396	14668	-0.253	0.00798975	40.4	33.6	16.2	9.8	74	26	43.4	0.091	-0.245	-0.091	0.245	Trichophthalma_punctata_NC_008755_1	0.105392	5	2.421	Trichophthalma_punctata_NC_008755	Trichophthalma_punctata_NC_008755	double
3	NC_050982.1	Populicerus confusus	Populicerus_confusus_NC_050982_1	Insecta	Hemiptera	Cicadellidae	Populicerus	Arthropoda	F	H	16395	14265	-0.068	0.00140287	41.4	36.3	11.5	10.7	77.7	22.2	47	0.066	-0.036	-0.066	0.036	Populicerus_confusus_NC_050982_1	0.129918	5	3.21	Populicerus_confusus_NC_050982	Populicerus_confusus_NC_050982	double
6	NC_050386.1	Coenobita brevimanus	Coenobita_brevimanus_NC_050386_1	Malacostraca	Decapoda	Coenobitidae	Coenobita	Arthropoda	F	I	16393	14784	0.187	0.0979076	27.7	37.3	14.3	20.7	65	35	58	-0.148	0.183	0.148	-0.183	Coenobita_brevimanus_NC_050386_1	0.0981516	5	2.608	Coenobita_brevimanus_NC_050386	Coenobita_brevimanus_NC_050386	double
3	NC_060762.1	Drosophila suzukii	Drosophila_suzukii_NC_060762_1	Insecta	Diptera	Drosophilidae	Drosophila	Arthropoda	F	H	16392	14725	-0.137	0.0122011	39.7	38.8	12.3	9.2	78.5	21.5	48	0.011	-0.143	-0.011	0.143	Drosophila_suzukii_NC_060762_1	0.101696	5	2.372	Drosophila_suzukii_NC_060762	Drosophila_suzukii_NC_060762	double
3	NC_037200.1	Dermestes maculatus	Dermestes_maculatus_NC_037200_1	Insecta	Coleoptera	Dermestidae	Dermestes	Arthropoda	F	H	16390	12941	-0.207	0.117023	40.8	36.2	13.8	9.2	77	23	45.4	0.06	-0.199	-0.06	0.199	Dermestes_maculatus_NC_037200_1	0.1205	5	2.737	Dermestes_maculatus_NC_037200	Dermestes_maculatus_NC_037200	double
3	NC_038191.1	Cicindela anchoralis	Cicindela_anchoralis_NC_038191_1	Insecta	Coleoptera	Carabidae	Cicindela	Arthropoda	F	H	16388	14702	-0.196	0.00347816	37.9	35.9	15.7	10.5	73.8	26.2	46.4	0.027	-0.201	-0.027	0.201	Cicindela_anchoralis_NC_038191_1	0.10288	5	2.417	Cicindela_anchoralis_NC_038191	Cicindela_anchoralis_NC_038191	double
3	NC_045881.1	Cephenemyia trompe	Cephenemyia_trompe_NC_045881_1	Insecta	Diptera	Oestridae	Cephenemyia	Arthropoda	Parasitoid	H	16387	14740	-0.252	0.00958076	39.6	38	14.1	8.3	77.6	22.4	46.3	0.022	-0.256	-0.022	0.256	Cephenemyia_trompe_NC_045881_1	0.100506	5	2.599	Cephenemyia_trompe_NC_045881	Cephenemyia_trompe_NC_045881	double
3	NC_034997.1	Zelandoperla fenestrata	Zelandoperla_fenestrata_NC_034997_1	Insecta	Plecoptera	Gripopterygidae	Zelandoperla	Arthropoda	F	H	16385	14721	-0.243	0.091181	34.9	31.2	21.2	12.6	66.1	33.8	43.8	0.055	-0.255	-0.055	0.255	Zelandoperla_fenestrata_NC_034997_1	0.101556	5	2.422	Zelandoperla_fenestrata_NC_034997	Zelandoperla_fenestrata_NC_034997	double
3	NC_050968.1	Melanostoma scalare	Melanostoma_scalare_NC_050968_1	Insecta	Diptera	Syrphidae	Melanostoma	Arthropoda	F	H	16380	14689	-0.121	0.0180708	41	40.3	10.6	8.2	81.3	18.8	48.5	0.008	-0.129	-0.008	0.129	Melanostoma_scalare_NC_050968_1	0.103236	5	2.472	Melanostoma_scalare_NC_050968	Melanostoma_scalare_NC_050968	double
3	NC_027178.1	Squilloides leptosquilla	Squilloides_leptosquilla_NC_027178_1	Malacostraca	Stomatopoda	Squillidae	Squilloides	Arthropoda	F	H	16376	14800	-0.204	0.0962384	37.3	33.8	17.5	11.3	71.1	28.8	45.1	0.049	-0.214	-0.049	0.214	Squilloides_leptosquilla_NC_027178_1	0.0962384	5	2.424	Squilloides_leptosquilla_NC_027178	Squilloides_leptosquilla_NC_027178	double
3	NC_048491.1	Trichopria drosophilae	Trichopria_drosophilae_NC_048491_1	Insecta	Hymenoptera	Diapriidae	Trichopria	Arthropoda	Parasitoid	H	16375	14424	0.052	0.109679	44.9	43.2	5.6	6.4	88.1	12	49.6	0.019	0.062	-0.019	-0.062	Trichopria_drosophilae_NC_048491_1	0.119145	5	4.102	Trichopria_drosophilae_NC_048491	Trichopria_drosophilae_NC_048491	double
3	NC_018349.1	Tropisternus sp. BYU-CO166	Tropisternus_sp__BYU_CO166_NC_018349_1	Insecta	Coleoptera	Hydrophilidae	Tropisternus	Arthropoda	F	H	16372	14632	-0.22	0.0021378	41.7	32.8	15.7	9.9	74.5	25.6	42.7	0.12	-0.226	-0.12	0.226	Tropisternus_sp__BYU_CO166_NC_018349_1	0.106279	5	2.478	Tropisternus_sp__BYU_CO166_NC_018349	Tropisternus_sp__BYU_CO166_NC_018349	double
3	NC_018127.1	Heterotermes sp. SLC-2012	Heterotermes_sp__SLC_2012_NC_018127_1	Insecta	Blattodea	Rhinotermitidae	Heterotermes	Arthropoda	F	H	16370	14779	-0.301	0.00830788	42.8	22.1	22.8	12.3	64.9	35.1	34.4	0.319	-0.301	-0.319	0.301	Heterotermes_sp__SLC_2012_NC_018127_1	0.09719	5	2.697	Heterotermes_sp__SLC_2012_NC_018127	Heterotermes_sp__SLC_2012_NC_018127	double
3	NC_057195.1	Gryllodes sigillatus	Gryllodes_sigillatus_NC_057195_1	Insecta	Orthoptera	Gryllidae	Gryllodes	Arthropoda	F	H	16369	14664	-0.305	0.00317674	37.8	32.6	19.3	10.3	70.4	29.6	42.9	0.075	-0.306	-0.075	0.306	Gryllodes_sigillatus_NC_057195_1	0.10416	5	2.482	Gryllodes_sigillatus_NC_057195	Gryllodes_sigillatus_NC_057195	double
3	NC_039739.1	Ornebius fuscicerci	Ornebius_fuscicerci_NC_039739_1	Insecta	Orthoptera	Mogoplistidae	Ornebius	Arthropoda	F	H	16368	14683	-0.331	0.00849218	37.9	37.1	16.5	8.5	75	25	45.6	0.011	-0.32	-0.011	0.32	Ornebius_fuscicerci_NC_039739_1	0.102945	5	2.701	Ornebius_fuscicerci_NC_039739	Ornebius_fuscicerci_NC_039739	double
4	NC_022935.1	Diabrotica barberi	Diabrotica_barberi_NC_022935_1	Insecta	Coleoptera	Chrysomelidae	Diabrotica	Arthropoda	F	H	16366	14415	-0.148	0.0974581	41.3	37.9	12.3	8.5	79.2	20.8	46.4	0.042	-0.18	-0.042	0.18	Diabrotica_barberi_NC_022935_1	0.119211	5	2.703	Diabrotica_barberi_NC_022935	Diabrotica_barberi_NC_022935	double
3	NC_037371.1	Nabicula flavomarginata	Nabicula_flavomarginata_NC_037371_1	Insecta	Hemiptera	Nabidae	Nabicula	Arthropoda	F	H	16366	14606	-0.136	0.0342784	38.9	33	15.6	12.4	71.9	28	45.4	0.082	-0.115	-0.082	0.115	Nabicula_flavomarginata_NC_037371_1	0.10754	5	2.88	Nabicula_flavomarginata_NC_037371	Nabicula_flavomarginata_NC_037371	double
3	NC_037488.1	Diaphanosoma dubium	Diaphanosoma_dubium_NC_037488_1	Branchiopoda	Diplostraca	Sididae	Diaphanosoma	Arthropoda	F	H	16362	14608	0.052	0.081836	27.8	37.8	16.1	18.2	65.6	34.3	56	-0.152	0.058	0.152	-0.058	Diaphanosoma_dubium_NC_037488_1	0.1072	5	2.889	Diaphanosoma_dubium_NC_037488	Diaphanosoma_dubium_NC_037488	double
3	NC_030541.1	Wasmannia auropunctata	Wasmannia_auropunctata_NC_030541_1	Insecta	Hymenoptera	Formicidae	Wasmannia	Arthropoda	F	H	16362	14631	-0.441	0.10011	38.5	37.6	17.5	6.4	76.1	23.9	44	0.011	-0.463	-0.011	0.463	Wasmannia_auropunctata_NC_030541_1	0.105794	5	4.1	Wasmannia_auropunctata_NC_030541	Wasmannia_auropunctata_NC_030541	double
3	NC_006378.1	Dermatobia hominis	Dermatobia_hominis_NC_006378_1	Insecta	Diptera	Oestridae	Dermatobia	Arthropoda	Parasitoid	H	16360	14723	-0.223	0.00562347	40.6	37.2	13.6	8.6	77.8	22.2	45.8	0.043	-0.227	-0.043	0.227	Dermatobia_hominis_NC_006378_1	0.100061	5	2.466	Dermatobia_hominis_NC_006378	Dermatobia_hominis_NC_006378	double
4	NC_034995.1	Helicana wuana	Helicana_wuana_NC_034995_1	Malacostraca	Decapoda	Varunidae	Helicana	Arthropoda	F	H	16359	14761	-0.285	0.0970719	33	35.5	20	11.5	68.5	31.5	47	-0.037	-0.269	0.037	0.269	Helicana_wuana_NC_034995_1	0.0976832	5	2.696	Helicana_wuana_NC_034995	Helicana_wuana_NC_034995	double
3	NC_040974.1	Xizicus maculatus	Xizicus_maculatus_NC_040974_1	Insecta	Orthoptera	Tettigoniidae	Xizicus	Arthropoda	F	H	16358	14723	-0.295	0.00397359	37	32.2	20.2	10.6	69.2	30.8	42.8	0.069	-0.311	-0.069	0.311	Xizicus_maculatus_NC_040974_1	0.0999511	5	2.346	Xizicus_maculatus_NC_040974	Xizicus_maculatus_NC_040974	double
3	NC_042676.1	Camponotus concavus	Camponotus_concavus_NC_042676_1	Insecta	Hymenoptera	Formicidae	Camponotus	Arthropoda	F	H	16357	14897	-0.391	0.0290396	38.7	39	15.7	6.5	77.7	22.2	45.5	-0.004	-0.415	0.004	0.415	Camponotus_concavus_NC_042676_1	0.0892584	5	4.172	Camponotus_concavus_NC_042676	Camponotus_concavus_NC_042676	double
3	NC_057553.1	Scarodytes savinensis	Scarodytes_savinensis_NC_057553_1	Insecta	Coleoptera	Dytiscidae	Scarodytes	Arthropoda	F	H	16356	14731	-0.18	0.0848007	41.5	37.2	12.6	8.7	78.7	21.3	45.9	0.054	-0.185	-0.054	0.185	Scarodytes_savinensis_NC_057553_1	0.0993519	5	2.421	Scarodytes_savinensis_NC_057553	Scarodytes_savinensis_NC_057553	double
3	NC_042436.1	Euscopus rufipes	Euscopus_rufipes_NC_042436_1	Insecta	Hemiptera	Pyrrhocoridae	Euscopus	Arthropoda	F	H	16355	14537	-0.236	0.0120452	42.8	32.9	15.1	9.2	75.7	24.3	42.1	0.131	-0.246	-0.131	0.246	Euscopus_rufipes_NC_042436_1	0.111159	5	3.102	Euscopus_rufipes_NC_042436	Euscopus_rufipes_NC_042436	double
4	NC_006992.1	Eriocheir sinensis	Eriocheir_sinensis_NC_006992_1	Malacostraca	Decapoda	Varunidae	Eriocheir	Arthropoda	F	H	16354	14775	-0.253	0.0417635	35.3	36.4	17.7	10.7	71.7	28.4	47.1	-0.015	-0.248	0.015	0.248	Eriocheir_sinensis_NC_006992_1	0.0965513	5	2.707	Eriocheir_sinensis_NC_006992	Eriocheir_sinensis_NC_006992	double
3	NC_013932.1	Hypoderma lineatum	Hypoderma_lineatum_NC_013932_1	Insecta	Diptera	Oestridae	Hypoderma	Arthropoda	Parasitoid	H	16354	14685	-0.237	0.0107619	40.6	37.2	13.8	8.3	77.8	22.1	45.5	0.044	-0.248	-0.044	0.248	Hypoderma_lineatum_NC_013932_1	0.101932	5	2.609	Hypoderma_lineatum_NC_013932	Hypoderma_lineatum_NC_013932	double
4	NC_011597.1	Eriocheir japonica	Eriocheir_japonica_NC_011597_1	Malacostraca	Decapoda	Varunidae	Eriocheir	Arthropoda	F	H	16352	14834	-0.246	0.0380382	35.2	36.5	17.7	10.7	71.7	28.4	47.2	-0.018	-0.245	0.018	0.245	Eriocheir_japonica_NC_011597_1	0.0928327	5	2.708	Eriocheir_japonica_NC_011597	Eriocheir_japonica_NC_011597	double
3	NC_018128.1	Macrotermes subhyalinus	Macrotermes_subhyalinus_NC_018128_1	Insecta	Blattodea	Termitidae	Macrotermes	Arthropoda	F	H	16351	14766	-0.329	0.00813406	43.9	21.7	22.9	11.5	65.6	34.4	33.2	0.339	-0.329	-0.339	0.329	Macrotermes_subhyalinus_NC_018128_1	0.096936	5	2.758	Macrotermes_subhyalinus_NC_018128	Macrotermes_subhyalinus_NC_018128	double
3	NC_050694.1	Indochinamon bhumibol	Indochinamon_bhumibol_NC_050694_1	Malacostraca	Decapoda	Potamidae	Indochinamon	Arthropoda	F	H	16351	14707	-0.257	0.0968137	34.8	35.6	18.8	10.9	70.4	29.7	46.5	-0.011	-0.267	0.011	0.267	Indochinamon_bhumibol_NC_050694_1	0.100544	5	2.767	Indochinamon_bhumibol_NC_050694	Indochinamon_bhumibol_NC_050694	double
3	NC_060541.1	Homoneura interstincta	Homoneura_interstincta_NC_060541_1	Insecta	Diptera	Lauxaniidae	Homoneura	Arthropoda	F	H	16351	14705	-0.192	0.0991988	38.8	36.8	14.6	9.8	75.6	24.4	46.6	0.027	-0.196	-0.027	0.196	Homoneura_interstincta_NC_060541_1	0.100667	5	2.384	Homoneura_interstincta_NC_060541	Homoneura_interstincta_NC_060541	double
3	NC_057548.1	Oreodytes davisii	Oreodytes_davisii_NC_057548_1	Insecta	Coleoptera	Dytiscidae	Oreodytes	Arthropoda	F	H	16348	14726	-0.174	0.0762784	40.1	38.2	12.7	8.9	78.3	21.6	47.1	0.024	-0.177	-0.024	0.177	Oreodytes_davisii_NC_057548_1	0.099217	5	2.388	Oreodytes_davisii_NC_057548	Oreodytes_davisii_NC_057548	double
3	NC_060739.1	Neptis raddei	Neptis_raddei_NC_060739_1	Insecta	Lepidoptera	Nymphalidae	Neptis	Arthropoda	F	H	16348	14717	-0.21	0.00795204	38.6	41.2	12.1	8.2	79.8	20.3	49.4	-0.032	-0.194	0.032	0.194	Neptis_raddei_NC_060739_1	0.0997676	5	2.693	Neptis_raddei_NC_060739	Neptis_raddei_NC_060739	double
3	NC_026116.1	Neocapritermes taracua	Neocapritermes_taracua_NC_026116_1	Insecta	Blattodea	Termitidae	Neocapritermes	Arthropoda	F	H	16346	14762	-0.269	0.0250826	43.6	24.4	20.4	11.6	68	32	36	0.282	-0.276	-0.282	0.276	Neocapritermes_taracua_NC_026116_1	0.0969044	5	2.729	Neocapritermes_taracua_NC_026116	Neocapritermes_taracua_NC_026116	double
3	NC_035509.1	Anoplocnemis curvipes	Anoplocnemis_curvipes_NC_035509_1	Insecta	Hemiptera	Coreidae	Anoplocnemis	Arthropoda	F	H	16345	14566	-0.191	0.00281432	41.5	31.3	16.6	10.5	72.8	27.1	41.8	0.14	-0.225	-0.14	0.225	Anoplocnemis_curvipes_NC_035509_1	0.108841	5	2.914	Anoplocnemis_curvipes_NC_035509	Anoplocnemis_curvipes_NC_035509	double
3	NC_031364.1	Panaorus albomaculatus	Panaorus_albomaculatus_NC_031364_1	Insecta	Hemiptera	Rhyparochromidae	Panaorus	Arthropoda	F	H	16345	14410	-0.233	0.00501682	44.4	31.6	14.5	9.5	76	24	41.1	0.168	-0.206	-0.168	0.206	Panaorus_albomaculatus_NC_031364_1	0.118385	5	3.027	Panaorus_albomaculatus_NC_031364	Panaorus_albomaculatus_NC_031364	double
3	NC_001566.1	Apis mellifera ligustica	Apis_mellifera_ligustica_NC_001566_1	Insecta	Hymenoptera	Apidae	Apis	Arthropoda	F	H	16343	14704	-0.258	0.0497461	43.2	41.7	9.6	5.5	84.9	15.1	47.2	0.018	-0.269	-0.018	0.269	Apis_mellifera_ligustica_NC_001566_1	0.100288	5	4.606	Apis_mellifera_ligustica_NC_001566	Apis_mellifera_ligustica_NC_001566	double
3	NC_051001.1	Hemerobius spodipennis	Hemerobius_spodipennis_NC_051001_1	Insecta	Neuroptera	Hemerobiidae	Hemerobius	Arthropoda	F	H	16343	14684	-0.129	0.0138286	40.4	39.8	11.1	8.6	80.2	19.7	48.4	0.007	-0.127	-0.007	0.127	Hemerobius_spodipennis_NC_051001_1	0.101511	5	2.407	Hemerobius_spodipennis_NC_051001	Hemerobius_spodipennis_NC_051001	double
3	NC_060589.1	Neogonodactylus bredini	Neogonodactylus_bredini_NC_060589_1	Malacostraca	Stomatopoda	Gonodactylidae	Neogonodactylus	Arthropoda	F	H	16342	14831	-0.148	0.0824257	34.1	35.4	17.7	12.8	69.5	30.5	48.2	-0.019	-0.159	0.019	0.159	Neogonodactylus_bredini_NC_060589_1	0.0924611	5	2.453	Neogonodactylus_bredini_NC_060589	Neogonodactylus_bredini_NC_060589	double
3	NC_034297.1	Daphnia galeata	Daphnia_galeata_NC_034297_1	Branchiopoda	Diplostraca	Daphniidae	Daphnia	Arthropoda	F	H	16339	14516	-0.155	0.00593672	32.8	31	20.7	15.5	63.8	36.2	46.5	0.028	-0.144	-0.028	0.144	Daphnia_galeata_NC_034297_1	0.111574	5	2.879	Daphnia_galeata_NC_034297	Daphnia_galeata_NC_034297	double
3	NC_036418.1	Picromerus griseus	Picromerus_griseus_NC_036418_1	Insecta	Hemiptera	Pentatomidae	Picromerus	Arthropoda	F	H	16338	14556	-0.161	0.015975	39.3	32.4	16.5	11.8	71.7	28.3	44.2	0.095	-0.167	-0.095	0.167	Picromerus_griseus_NC_036418_1	0.109071	5	3.153	Picromerus_griseus_NC_036418	Picromerus_griseus_NC_036418	double
3	NC_030593.1	Hygrobia hermanni	Hygrobia_hermanni_NC_030593_1	Insecta	Coleoptera	Hygrobiidae	Hygrobia	Arthropoda	F	H	16336	14707	-0.22	0.00232615	41.1	37.2	13.2	8.4	78.3	21.6	45.6	0.05	-0.225	-0.05	0.225	Hygrobia_hermanni_NC_030593_1	0.0997184	5	2.478	Hygrobia_hermanni_NC_030593	Hygrobia_hermanni_NC_030593	double
3	NC_052915.1	Chrysolina aeruginosa	Chrysolina_aeruginosa_NC_052915_1	Insecta	Coleoptera	Chrysomelidae	Chrysolina	Arthropoda	F	H	16335	14503	-0.235	0.00318335	40.5	35	15.3	9.2	75.5	24.5	44.2	0.073	-0.252	-0.073	0.252	Chrysolina_aeruginosa_NC_052915_1	0.112152	5	2.827	Chrysolina_aeruginosa_NC_052915	Chrysolina_aeruginosa_NC_052915	double
4	NC_011598.1	Eriocheir hepuensis	Eriocheir_hepuensis_NC_011598_1	Malacostraca	Decapoda	Varunidae	Eriocheir	Arthropoda	F	H	16335	14836	-0.241	0.0383226	35.1	36.4	17.7	10.8	71.5	28.5	47.2	-0.018	-0.245	0.018	0.245	Eriocheir_hepuensis_NC_011598_1	0.0917661	5	2.705	Eriocheir_hepuensis_NC_011598	Eriocheir_hepuensis_NC_011598	double
3	NC_057549.1	Oreodytes scitulus	Oreodytes_scitulus_NC_057549_1	Insecta	Coleoptera	Dytiscidae	Oreodytes	Arthropoda	F	H	16333	14725	-0.188	0.0645932	40.4	36.8	13.5	9.3	77.2	22.8	46.1	0.046	-0.187	-0.046	0.187	Oreodytes_scitulus_NC_057549_1	0.098451	5	2.398	Oreodytes_scitulus_NC_057549	Oreodytes_scitulus_NC_057549	double
3	NC_041170.1	Chaetocnema pelagica	Chaetocnema_pelagica_NC_041170_1	Insecta	Coleoptera	Chrysomelidae	Chaetocnema	Arthropoda	F	H	16331	14554	-0.221	0.00140836	40.6	36.3	13.9	9.2	76.9	23.1	45.5	0.056	-0.202	-0.056	0.202	Chaetocnema_pelagica_NC_041170_1	0.108811	5	2.72	Chaetocnema_pelagica_NC_041170	Chaetocnema_pelagica_NC_041170	double
4	NC_033509.1	Pacifastacus leniusculus	Pacifastacus_leniusculus_NC_033509_1	Malacostraca	Decapoda	Astacidae	Pacifastacus	Arthropoda	F	H	16331	14634	0.215	0.1033	33.9	39.2	10.6	16.3	73.1	26.9	55.5	-0.073	0.214	0.073	-0.214	Pacifastacus_leniusculus_NC_033509_1	0.103913	5	2.701	Pacifastacus_leniusculus_NC_033509	Pacifastacus_leniusculus_NC_033509	double
3	NC_042682.1	Panstrongylus rufotuberculatus	Panstrongylus_rufotuberculatus_NC_042682_1	Insecta	Hemiptera	Reduviidae	Panstrongylus	Arthropoda	MP	H	16331	14512	-0.238	0.0203907	40.2	27.9	19.8	12.1	68.1	31.9	40	0.181	-0.24	-0.181	0.24	Panstrongylus_rufotuberculatus_NC_042682_1	0.111383	5	2.831	Panstrongylus_rufotuberculatus_NC_042682	Panstrongylus_rufotuberculatus_NC_042682	double
3	NC_018130.1	Macrognathotermes errator	Macrognathotermes_errator_NC_018130_1	Insecta	Blattodea	Termitidae	Macrognathotermes	Arthropoda	F	H	16330	14784	-0.278	0.00673607	42.3	24.5	21.3	11.9	66.8	33.2	36.4	0.267	-0.284	-0.267	0.284	Macrognathotermes_errator_NC_018130_1	0.0946724	5	2.808	Macrognathotermes_errator_NC_018130	Macrognathotermes_errator_NC_018130	double
3	NC_050677.1	Saron marmoratus	Saron_marmoratus_NC_050677_1	Malacostraca	Decapoda	Hippolytidae	Saron	Arthropoda	F	H	16330	14725	-0.335	0.0864054	37.7	30.2	21.7	10.4	67.9	32.1	40.6	0.11	-0.351	-0.11	0.351	Saron_marmoratus_NC_050677_1	0.0982854	5	2.837	Saron_marmoratus_NC_050677	Saron_marmoratus_NC_050677	double
3	NC_045103.1	Paracolopha morrisoni	Paracolopha_morrisoni_NC_045103_1	Insecta	Hemiptera	Pemphigidae	Paracolopha	Arthropoda	F	H	16330	14445	-0.285	0.11537	44.8	40.2	9.8	5.3	85	15.1	45.5	0.054	-0.299	-0.054	0.299	Paracolopha_morrisoni_NC_045103_1	0.115432	5	3.981	Paracolopha_morrisoni_NC_045103	Paracolopha_morrisoni_NC_045103	double
3	NC_050310.1	Eubranchipus grubii	Eubranchipus_grubii_NC_050310_1	Branchiopoda	Anostraca	Chirocephalidae	Eubranchipus	Arthropoda	F	H	16328	13969	-0.081	0.137065	36.3	30.7	17.6	15.4	67	33	46.1	0.083	-0.065	-0.083	0.065	Eubranchipus_grubii_NC_050310_1	0.144476	5	2.924	Eubranchipus_grubii_NC_050310	Eubranchipus_grubii_NC_050310	double
3	NC_037914.1	Cardiodactylus muiri	Cardiodactylus_muiri_NC_037914_1	Insecta	Orthoptera	Gryllidae	Cardiodactylus	Arthropoda	F	H	16328	14676	-0.28	0.00747183	41.4	35.1	15.2	8.4	76.5	23.6	43.5	0.083	-0.289	-0.083	0.289	Cardiodactylus_muiri_NC_037914_1	0.101176	5	2.511	Cardiodactylus_muiri_NC_037914	Cardiodactylus_muiri_NC_037914	double
3	NC_044778.1	Emeia pseudosauteri	Emeia_pseudosauteri_NC_044778_1	Insecta	Coleoptera	Lampyridae	Emeia	Arthropoda	F	H	16327	14491	-0.204	0.112452	42.3	37	12.7	8.1	79.3	20.8	45.1	0.067	-0.218	-0.067	0.218	Emeia_pseudosauteri_NC_044778_1	0.112452	5	2.816	Emeia_pseudosauteri_NC_044778	Emeia_pseudosauteri_NC_044778	double
3	NC_060590.1	Neogonodactylus oerstedii	Neogonodactylus_oerstedii_NC_060590_1	Malacostraca	Stomatopoda	Gonodactylidae	Neogonodactylus	Arthropoda	F	H	16327	14837	-0.127	0.0900349	33.5	35.5	17.7	13.4	69	31.1	48.9	-0.03	-0.138	0.03	0.138	Neogonodactylus_oerstedii_NC_060590_1	0.0912599	5	2.451	Neogonodactylus_oerstedii_NC_060590	Neogonodactylus_oerstedii_NC_060590	double
3	NC_018125.1	Coptotermes lacteus	Coptotermes_lacteus_NC_018125_1	Insecta	Blattodea	Rhinotermitidae	Coptotermes	Arthropoda	F	H	16326	14773	-0.325	0.00753399	42.9	21.5	23.5	12.1	64.4	35.6	33.6	0.333	-0.322	-0.333	0.322	Coptotermes_lacteus_NC_018125_1	0.0951243	5	2.672	Coptotermes_lacteus_NC_018125	Coptotermes_lacteus_NC_018125	double
3	NC_015800.1	Coptotermes formosanus	Coptotermes_formosanus_NC_015800_1	Insecta	Blattodea	Rhinotermitidae	Coptotermes	Arthropoda	F	H	16326	14676	-0.319	0.00851403	43.6	22.3	22.4	11.7	65.9	34.1	34	0.324	-0.315	-0.324	0.315	Coptotermes_formosanus_NC_015800_1	0.101066	5	2.67	Coptotermes_formosanus_NC_015800	Coptotermes_formosanus_NC_015800	double
5	NC_030255.1	Munida gregaria	Munida_gregaria_NC_030255_1	Malacostraca	Decapoda	Munididae	Munida	Arthropoda	F	H	16326	14822	-0.165	0.0919392	36.7	38.2	14.6	10.5	74.9	25.1	48.7	-0.02	-0.162	0.02	0.162	Munida_gregaria_NC_030255_1	0.092123	5	2.581	Munida_gregaria_NC_030255	Munida_gregaria_NC_030255	double
3	NC_025522.1	Macrotermes natalensis	Macrotermes_natalensis_NC_025522_1	Insecta	Blattodea	Termitidae	Macrotermes	Arthropoda	F	H	16325	14769	-0.334	0.00839204	44.2	21.5	22.9	11.5	65.7	34.4	33	0.346	-0.331	-0.346	0.331	Macrotermes_natalensis_NC_025522_1	0.0953139	5	2.756	Macrotermes_natalensis_NC_025522	Macrotermes_natalensis_NC_025522	double
3	NC_007443.1	Lysiosquillina maculata	Lysiosquillina_maculata_NC_007443_1	Malacostraca	Stomatopoda	Lysiosquillidae	Lysiosquillina	Arthropoda	F	H	16325	14828	-0.178	0.0916998	32.8	31.1	21.4	14.7	63.9	36.1	45.8	0.026	-0.185	-0.026	0.185	Lysiosquillina_maculata_NC_007443_1	0.0916998	5	2.456	Lysiosquillina_maculata_NC_007443	Lysiosquillina_maculata_NC_007443	double
3	NC_057543.1	Leconectes striatellus	Leconectes_striatellus_NC_057543_1	Insecta	Coleoptera	Dytiscidae	Leconectes	Arthropoda	F	H	16324	14724	-0.205	0.0431267	40.1	36.2	14.2	9.5	76.3	23.7	45.7	0.051	-0.2	-0.051	0.2	Leconectes_striatellus_NC_057543_1	0.0980152	5	2.423	Leconectes_striatellus_NC_057543	Leconectes_striatellus_NC_057543	double
3	NC_005944.1	Philaenus spumarius	Philaenus_spumarius_NC_005944_1	Insecta	Hemiptera	Aphrophoridae	Philaenus	Arthropoda	F	H	16324	14458	-0.087	0.00189904	40.9	36.1	12.4	10.6	77	23	46.7	0.063	-0.075	-0.063	0.075	Philaenus_spumarius_NC_005944_1	0.11431	5	2.809	Philaenus_spumarius_NC_005944	Philaenus_spumarius_NC_005944	double
3	NC_050320.1	Simulium noelleri	Simulium_noelleri_NC_050320_1	Insecta	Diptera	Simuliidae	Simulium	Arthropoda	MP	H	16323	14791	-0.199	0.0929976	38.2	35.8	15.6	10.4	74	26	46.2	0.033	-0.199	-0.033	0.199	Simulium_noelleri_NC_050320_1	0.0938553	5	2.31	Simulium_noelleri_NC_050320	Simulium_noelleri_NC_050320	double
3	NC_042723.1	Macropsis notata	Macropsis_notata_NC_042723_1	Insecta	Hemiptera	Cicadellidae	Macropsis	Arthropoda	F	H	16323	14240	-0.15	0.000918949	44.3	32.5	13.2	10	76.8	23.2	42.5	0.154	-0.136	-0.154	0.136	Macropsis_notata_NC_042723_1	0.127611	5	3.276	Macropsis_notata_NC_042723	Macropsis_notata_NC_042723	double
4	NC_057472.1	Macrophthalmus abbreviatus	Macrophthalmus_abbreviatus_NC_057472_1	Malacostraca	Decapoda	Macrophthalmidae	Macrophthalmus	Arthropoda	F	H	16322	14737	-0.345	0.0969244	34.7	32.5	22.1	10.6	67.2	32.7	43.1	0.033	-0.351	-0.033	0.351	Macrophthalmus_abbreviatus_NC_057472_1	0.0971082	5	2.799	Macrophthalmus_abbreviatus_NC_057472	Macrophthalmus_abbreviatus_NC_057472	double
3	NC_053660.1	Paratoacris reticulipennis	Paratoacris_reticulipennis_NC_053660_1	Insecta	Orthoptera	Acrididae	Paratoacris	Arthropoda	F	H	16321	14741	-0.154	0.00533056	43.1	32.1	14.4	10.4	75.2	24.8	42.5	0.146	-0.162	-0.146	0.162	Paratoacris_reticulipennis_NC_053660_1	0.0968078	5	2.641	Paratoacris_reticulipennis_NC_053660	Paratoacris_reticulipennis_NC_053660	double
3	NC_022682.1	Cavariella salicicola	Cavariella_salicicola_NC_022682_1	Insecta	Hemiptera	Aphididae	Cavariella	Arthropoda	F	I	16317	14367	-0.286	0.119507	45.4	38.5	10.4	5.7	83.9	16.1	44.2	0.081	-0.293	-0.081	0.293	Cavariella_salicicola_NC_022682_1	0.119507	5	3.945	Cavariella_salicicola_NC_022682	Cavariella_salicicola_NC_022682	double
3	NC_034805.1	Muscina angustifrons	Muscina_angustifrons_NC_034805_1	Insecta	Diptera	Muscidae	Muscina	Arthropoda	F	H	16316	13168	-0.221	0.09886	40.9	38.4	12.3	8.3	79.3	20.6	46.7	0.032	-0.195	-0.032	0.195	Muscina_angustifrons_NC_034805_1	0.102905	5	2.496	Muscina_angustifrons_NC_034805	Muscina_angustifrons_NC_034805	double
3	NC_026670.1	Peirates atromaculatus	Peirates_atromaculatus_NC_026670_1	Insecta	Hemiptera	Reduviidae	Peirates	Arthropoda	F	H	16314	14542	-0.179	0.00717175	40.9	30.4	17	11.7	71.3	28.7	42.1	0.148	-0.186	-0.148	0.186	Peirates_atromaculatus_NC_026670_1	0.108618	5	2.892	Peirates_atromaculatus_NC_026670	Peirates_atromaculatus_NC_026670	double
3	NC_011195.1	Bilobella aurantiaca	Bilobella_aurantiaca_NC_011195_1	Collembola	Poduromorpha	Neanuridae	Bilobella	Arthropoda	F	I	16312	14615	-0.3	0.0805542	34.8	37.9	17.9	9.4	72.7	27.3	47.3	-0.042	-0.313	0.042	0.313	Bilobella_aurantiaca_NC_011195_1	0.104034	5	3.491	Bilobella_aurantiaca_NC_011195	Bilobella_aurantiaca_NC_011195	double
3	NC_034661.1	Capnia zijinshana	Capnia_zijinshana_NC_034661_1	Insecta	Plecoptera	Capniidae	Capnia	Arthropoda	F	H	16310	14772	-0.17	0.0015328	34.5	34	18.6	12.9	68.5	31.5	46.9	0.007	-0.179	-0.007	0.179	Capnia_zijinshana_NC_034661_1	0.094298	5	2.445	Capnia_zijinshana_NC_034661	Capnia_zijinshana_NC_034661	double
4	NC_033505.1	Cambaroides dauricus	Cambaroides_dauricus_NC_033505_1	Malacostraca	Decapoda	Cambaridae	Cambaroides	Arthropoda	F	H	16308	14395	0.196	0.117304	33.6	38.9	11	16.5	72.5	27.5	55.4	-0.074	0.2	0.074	-0.2	Cambaroides_dauricus_NC_033505_1	0.117304	5	2.699	Cambaroides_dauricus_NC_033505	Cambaroides_dauricus_NC_033505	double
3	NC_034284.1	Rhombodera valida	Rhombodera_valida_NC_034284_1	Insecta	Mantodea	Mantidae	Rhombodera	Arthropoda	F	H	16308	14711	-0.239	0.0391219	39.8	35	15.5	9.7	74.8	25.2	44.7	0.065	-0.234	-0.065	0.234	Rhombodera_valida_NC_034284_1	0.0979274	5	2.661	Rhombodera_valida_NC_034284	Rhombodera_valida_NC_034284	double
4	NC_040976.1	Metaplax longipes	Metaplax_longipes_NC_040976_1	Malacostraca	Decapoda	Varunidae	Metaplax	Arthropoda	F	H	16305	14924	-0.265	0.084514	37.6	33.8	17.9	10.6	71.4	28.5	44.4	0.053	-0.257	-0.053	0.257	Metaplax_longipes_NC_040976_1	0.0846979	5	2.714	Metaplax_longipes_NC_040976	Metaplax_longipes_NC_040976	double
5	NC_021458.1	Paralithodes brevipes	Paralithodes_brevipes_NC_021458_1	Malacostraca	Decapoda	Lithodidae	Paralithodes	Arthropoda	F	H	16303	14539	-0.138	0.0481506	36.6	35.9	15.6	11.9	72.5	27.5	47.8	0.009	-0.134	-0.009	0.134	Paralithodes_brevipes_NC_021458_1	0.108201	5	2.599	Paralithodes_brevipes_NC_021458	Paralithodes_brevipes_NC_021458	double
4	NC_025571.1	Cyclograpsus granulosus	Cyclograpsus_granulosus_NC_025571_1	Malacostraca	Decapoda	Varunidae	Cyclograpsus	Arthropoda	F	H	16300	14776	-0.267	0.092454	33.1	36.1	19.5	11.2	69.2	30.7	47.3	-0.043	-0.272	0.043	0.272	Cyclograpsus_granulosus_NC_025571_1	0.0934969	5	2.704	Cyclograpsus_granulosus_NC_025571	Cyclograpsus_granulosus_NC_025571	double
3	NC_042946.1	Diorhabda carinulata	Diorhabda_carinulata_NC_042946_1	Insecta	Coleoptera	Chrysomelidae	Diorhabda	Arthropoda	F	H	16298	14472	-0.171	0.09584	40.6	38.3	12.4	8.6	78.9	21	46.9	0.029	-0.181	-0.029	0.181	Diorhabda_carinulata_NC_042946_1	0.112038	5	2.645	Diorhabda_carinulata_NC_042946	Diorhabda_carinulata_NC_042946	double
3	NC_044652.1	Paratrichobius longicrus	Paratrichobius_longicrus_NC_044652_1	Insecta	Diptera	Streblidae	Paratrichobius	Arthropoda	EctoP	H	16296	14654	-0.249	0.00386598	42.8	38.2	11.8	7	81	18.8	45.2	0.057	-0.257	-0.057	0.257	Paratrichobius_longicrus_NC_044652_1	0.00386598	5	2.496	Paratrichobius_longicrus_NC_044652	Paratrichobius_longicrus_NC_044652	double
3	NC_041116.1	Choroedocus capensis	Choroedocus_capensis_NC_041116_1	Insecta	Orthoptera	Acrididae	Choroedocus	Arthropoda	F	H	16293	14736	-0.166	0.00754925	41.8	31.6	15.4	11.1	73.4	26.5	42.7	0.139	-0.164	-0.139	0.164	Choroedocus_capensis_NC_041116_1	0.0955625	5	2.636	Choroedocus_capensis_NC_041116	Choroedocus_capensis_NC_041116	double
3	NC_053259.1	Meteorus pulchricornis	Meteorus_pulchricornis_NC_053259_1	Insecta	Hymenoptera	Braconidae	Meteorus	Arthropoda	Parasitoid	H	16290	14443	0.138	0.0313076	38.7	45.3	7	9.1	84	16.1	54.4	-0.078	0.13	0.078	-0.13	Meteorus_pulchricornis_NC_053259_1	0.113382	5	4.341	Meteorus_pulchricornis_NC_053259	Meteorus_pulchricornis_NC_053259	double
4	NC_038179.1	Gaetice depressus	Gaetice_depressus_NC_038179_1	Malacostraca	Decapoda	Varunidae	Gaetice	Arthropoda	F	H	16288	14786	-0.226	0.0918468	35.4	37.6	16.5	10.5	73	27	48.1	-0.03	-0.223	0.03	0.223	Gaetice_depressus_NC_038179_1	0.0922151	5	2.704	Gaetice_depressus_NC_038179	Gaetice_depressus_NC_038179	double
4	NC_034923.1	Pachycerina decemlineata	Pachycerina_decemlineata_NC_034923_1	Insecta	Diptera	Lauxaniidae	Pachycerina	Arthropoda	F	H	16286	14750	-0.166	0.00779811	38.3	38	13.9	9.8	76.3	23.7	47.8	0.004	-0.169	-0.004	0.169	Pachycerina_decemlineata_NC_034923_1	0.0943141	5	2.381	Pachycerina_decemlineata_NC_034923	Pachycerina_decemlineata_NC_034923	double
3	NC_052902.1	Ochthebius salinarius	Ochthebius_salinarius_NC_052902_1	Insecta	Coleoptera	Hydraenidae	Ochthebius	Arthropoda	F	I	16280	14566	-0.161	0.0590295	40.8	38.9	11.9	8.4	79.7	20.3	47.3	0.024	-0.169	-0.024	0.169	Ochthebius_salinarius_NC_052902_1	0.105283	5	2.498	Ochthebius_salinarius_NC_052902	Ochthebius_salinarius_NC_052902	double
3	NC_050653.1	Osmylus fulvicephalus	Osmylus_fulvicephalus_NC_050653_1	Insecta	Neuroptera	Osmylidae	Osmylus	Arthropoda	F	H	16280	14704	-0.172	0.0186118	38.4	40	12.7	9	78.4	21.7	49	-0.02	-0.173	0.02	0.173	Osmylus_fulvicephalus_NC_050653_1	0.0968059	5	2.308	Osmylus_fulvicephalus_NC_050653	Osmylus_fulvicephalus_NC_050653	double
3	NC_058255.1	Eurycantha calcarata	Eurycantha_calcarata_NC_058255_1	Insecta	Phasmatodea	Phasmatidae	Eurycantha	Arthropoda	F	H	16280	14556	-0.211	0.00104423	45	33.2	13.3	8.5	78.2	21.8	41.7	0.151	-0.22	-0.151	0.22	Eurycantha_calcarata_NC_058255_1	0.105897	5	2.82	Eurycantha_calcarata_NC_058255	Eurycantha_calcarata_NC_058255	double
3	NC_037182.1	Peregrinus maidis	Peregrinus_maidis_NC_037182_1	Insecta	Hemiptera	Delphacidae	Peregrinus	Arthropoda	F	H	16279	14195	-0.25	0.0299773	43.1	34.7	13.8	8.4	77.8	22.2	43.1	0.108	-0.244	-0.108	0.244	Peregrinus_maidis_NC_037182_1	0.128018	5	3.755	Peregrinus_maidis_NC_037182	Peregrinus_maidis_NC_037182	double
3	NC_007442.1	Gonodactylus chiragra	Gonodactylus_chiragra_NC_007442_1	Malacostraca	Stomatopoda	Gonodactylidae	Gonodactylus	Arthropoda	F	H	16279	14833	-0.227	0.0888261	35.1	32.4	20.1	12.5	67.5	32.6	44.9	0.041	-0.234	-0.041	0.234	Gonodactylus_chiragra_NC_007442_1	0.0887647	5	2.445	Gonodactylus_chiragra_NC_007442	Gonodactylus_chiragra_NC_007442	double
3	NC_028041.1	Phlebotomus chinensis	Phlebotomus_chinensis_NC_028041_1	Insecta	Diptera	Psychodidae	Phlebotomus	Arthropoda	MP	H	16277	14721	-0.22	0.00761811	39.1	40.2	13	7.8	79.3	20.8	48	-0.014	-0.248	0.014	0.248	Phlebotomus_chinensis_NC_028041_1	0.095595	5	2.474	Phlebotomus_chinensis_NC_028041	Phlebotomus_chinensis_NC_028041	double
3	NC_031652.1	Ducetia japonica	Ducetia_japonica_NC_031652_1	Insecta	Orthoptera	Tettigoniidae	Ducetia	Arthropoda	F	H	16276	14737	-0.233	0.0412263	37.4	36.6	15.9	10	74	25.9	46.6	0.01	-0.228	-0.01	0.228	Ducetia_japonica_NC_031652_1	0.0945564	5	2.399	Ducetia_japonica_NC_031652	Ducetia_japonica_NC_031652	double
3	NC_016203.1	Cramptonomyia spenceri	Cramptonomyia_spenceri_NC_016203_1	Insecta	Diptera	Pachyneuridae	Cramptonomyia	Arthropoda	F	H	16274	14820	-0.233	0.0236574	38.9	37.2	14.8	9.1	76.1	23.9	46.3	0.022	-0.238	-0.022	0.238	Cramptonomyia_spenceri_NC_016203_1	0.089345	5	2.383	Cramptonomyia_spenceri_NC_016203	Cramptonomyia_spenceri_NC_016203	double
3	NC_024657.1	Dysmicohermes ingens	Dysmicohermes_ingens_NC_024657_1	Insecta	Megaloptera	Corydalidae	Dysmicohermes	Arthropoda	F	H	16271	14723	-0.166	0.00325733	39.3	39.2	12.6	8.9	78.5	21.5	48.1	0.001	-0.173	-0.001	0.173	Dysmicohermes_ingens_NC_024657_1	0.0951386	5	2.325	Dysmicohermes_ingens_NC_024657	Dysmicohermes_ingens_NC_024657	double
3	NC_045212.1	Acosmetura nigrogeniculata	Acosmetura_nigrogeniculata_NC_045212_1	Insecta	Orthoptera	Tettigoniidae	Acosmetura	Arthropoda	F	H	16271	14742	-0.257	0.00743654	36.4	34.8	18.4	10.5	71.2	28.9	45.3	0.022	-0.274	-0.022	0.274	Acosmetura_nigrogeniculata_NC_045212_1	0.0939709	5	2.387	Acosmetura_nigrogeniculata_NC_045212	Acosmetura_nigrogeniculata_NC_045212	double
3	NC_038090.1	Anastrangalia sequensi	Anastrangalia_sequensi_NC_038090_1	Insecta	Coleoptera	Cerambycidae	Anastrangalia	Arthropoda	F	H	16269	14628	-0.2	0.00264306	40.2	38.5	13	8.4	78.7	21.4	46.9	0.023	-0.216	-0.023	0.216	Anastrangalia_sequensi_NC_038090_1	0.100867	5	2.559	Anastrangalia_sequensi_NC_038090	Anastrangalia_sequensi_NC_038090	double
3	NC_029326.1	Titanodula formosana	Titanodula_formosana_NC_029326_1	Insecta	Mantodea	Mantidae	Titanodula	Arthropoda	F	H	16266	14719	-0.213	0.0434649	39.7	36.1	14.6	9.6	75.8	24.2	45.7	0.047	-0.205	-0.047	0.205	Titanodula_formosana_NC_029326_1	0.0951064	5	2.652	Titanodula_formosana_NC_029326	Titanodula_formosana_NC_029326	double
3	NC_046537.1	Heteropternis respondens	Heteropternis_respondens_NC_046537_1	Insecta	Orthoptera	Acrididae	Heteropternis	Arthropoda	F	H	16265	14770	-0.184	0.00577928	44.4	31.3	14.4	9.9	75.7	24.3	41.2	0.172	-0.185	-0.172	0.185	Heteropternis_respondens_NC_046537_1	0.0919152	5	2.705	Heteropternis_respondens_NC_046537	Heteropternis_respondens_NC_046537	double
5	NC_046058.1	Diaphorencyrtus aligarhensis	Diaphorencyrtus_aligarhensis_NC_046058_1	Insecta	Hymenoptera	Encyrtidae	Diaphorencyrtus	Arthropoda	Parasitoid	H	16264	14627	-0.252	0.0827595	46.8	35	11.5	6.7	81.8	18.2	41.7	0.145	-0.263	-0.145	0.263	Diaphorencyrtus_aligarhensis_NC_046058_1	0.100652	5	4.305	Diaphorencyrtus_aligarhensis_NC_046058	Diaphorencyrtus_aligarhensis_NC_046058	double
3	NC_006281.1	Callinectes sapidus	Callinectes_sapidus_NC_006281_1	Malacostraca	Decapoda	Portunidae	Callinectes	Arthropoda	F	H	16263	14710	-0.271	0.0954313	34.2	34.9	19.8	11.1	69.1	30.9	46	-0.011	-0.279	0.011	0.279	Callinectes_sapidus_NC_006281_1	0.0954928	5	2.785	Callinectes_sapidus_NC_006281	Callinectes_sapidus_NC_006281	double
3	NC_045102.1	Figulus binodulus	Figulus_binodulus_NC_045102_1	Insecta	Coleoptera	Lucanidae	Figulus	Arthropoda	F	H	16261	14501	-0.319	0.00264436	38.5	30.7	20.3	10.4	69.2	30.7	41.1	0.113	-0.321	-0.113	0.321	Figulus_binodulus_NC_045102_1	0.108234	5	2.558	Figulus_binodulus_NC_045102	Figulus_binodulus_NC_045102	double
3	NC_046564.1	Sphingonotus yenchihensis	Sphingonotus_yenchihensis_NC_046564_1	Insecta	Orthoptera	Acrididae	Sphingonotus	Arthropoda	F	H	16261	14782	-0.194	0.00528873	44.5	30.4	15	10.1	74.9	25.1	40.5	0.188	-0.196	-0.188	0.196	Sphingonotus_yenchihensis_NC_046564_1	0.0909538	5	2.623	Sphingonotus_yenchihensis_NC_046564	Sphingonotus_yenchihensis_NC_046564	double
3	NC_046563.1	Sphingonotus ningsianus	Sphingonotus_ningsianus_NC_046563_1	Insecta	Orthoptera	Acrididae	Sphingonotus	Arthropoda	F	H	16261	14783	-0.209	0.00510424	44.5	29.6	15.6	10.3	74.1	25.9	39.9	0.201	-0.206	-0.201	0.206	Sphingonotus_ningsianus_NC_046563_1	0.0908923	5	2.628	Sphingonotus_ningsianus_NC_046563	Sphingonotus_ningsianus_NC_046563	double
3	NC_060311.1	Gonodactylus smithii	Gonodactylus_smithii_NC_060311_1	Malacostraca	Stomatopoda	Gonodactylidae	Gonodactylus	Arthropoda	F	H	16260	14829	-0.226	0.0880074	35.3	32.5	19.8	12.4	67.8	32.2	44.9	0.042	-0.23	-0.042	0.23	Gonodactylus_smithii_NC_060311_1	0.0880074	5	2.444	Gonodactylus_smithii_NC_060311	Gonodactylus_smithii_NC_060311	double
3	NC_049860.1	Ochetellus glaber	Ochetellus_glaber_NC_049860_1	Insecta	Hymenoptera	Formicidae	Ochetellus	Arthropoda	F	H	16259	14710	-0.347	0.0937942	41.5	40.7	12.1	5.6	82.2	17.7	46.3	0.01	-0.366	-0.01	0.366	Ochetellus_glaber_NC_049860_1	0.0952703	5	4.091	Ochetellus_glaber_NC_049860	Ochetellus_glaber_NC_049860	double
3	NC_030176.1	Vollenhovia emeryi	Vollenhovia_emeryi_NC_030176_1	Insecta	Hymenoptera	Formicidae	Vollenhovia	Arthropoda	F	H	16259	14725	-0.436	0.0886893	39.6	36.6	17.3	6.6	76.2	23.9	43.2	0.039	-0.447	-0.039	0.447	Vollenhovia_emeryi_NC_030176_1	0.0943477	5	4.228	Vollenhovia_emeryi_NC_030176	Vollenhovia_emeryi_NC_030176	double
3	NC_011115.1	Oedaleus asiaticus	Oedaleus_asiaticus_NC_011115_1	Insecta	Orthoptera	Acrididae	Oedaleus	Arthropoda	F	H	16259	14760	-0.186	0.00602743	45	30.4	14.6	10	75.4	24.6	40.4	0.195	-0.184	-0.195	0.184	Oedaleus_asiaticus_NC_011115_1	0.0921951	5	2.737	Oedaleus_asiaticus_NC_011115	Oedaleus_asiaticus_NC_011115	double
4	NC_033506.1	Cambaroides japonicus	Cambaroides_japonicus_NC_033506_1	Malacostraca	Decapoda	Cambaridae	Cambaroides	Arthropoda	F	H	16257	14392	0.223	0.114535	32.6	39.3	10.9	17.2	71.9	28.1	56.5	-0.092	0.223	0.092	-0.223	Cambaroides_japonicus_NC_033506_1	0.11472	5	2.702	Cambaroides_japonicus_NC_033506	Cambaroides_japonicus_NC_033506	double
3	NC_033986.1	Metrioptera bonneti	Metrioptera_bonneti_NC_033986_1	Insecta	Orthoptera	Tettigoniidae	Metrioptera	Arthropoda	F	H	16256	14733	-0.27	0.00307579	35	32.8	20.6	11.6	67.8	32.2	44.4	0.031	-0.277	-0.031	0.277	Metrioptera_bonneti_NC_033986_1	0.0936885	5	2.393	Metrioptera_bonneti_NC_033986	Metrioptera_bonneti_NC_033986	double
3	NC_053271.1	Gryposmylus pennyi	Gryposmylus_pennyi_NC_053271_1	Insecta	Neuroptera	Osmylidae	Gryposmylus	Arthropoda	F	H	16255	14722	-0.131	0.0121809	39.3	41.2	11.1	8.4	80.5	19.5	49.6	-0.023	-0.141	0.023	0.141	Gryposmylus_pennyi_NC_053271_1	0.0943094	5	2.359	Gryposmylus_pennyi_NC_053271	Gryposmylus_pennyi_NC_053271	double
4	NC_058598.1	Dipterophagus daci	Dipterophagus_daci_NC_058598_1	Insecta	Strepsiptera	Halictophagidae	Dipterophagus	Arthropoda	Parasitoid	H	16255	13889	-0.314	0.145063	45.1	39.6	10	5	84.7	15	44.6	0.065	-0.331	-0.065	0.331	Dipterophagus_daci_NC_058598_1	0.145555	5	5.808	Dipterophagus_daci_NC_058598	Dipterophagus_daci_NC_058598	double
3	NC_032690.1	Dacus longicornis	Dacus_longicornis_NC_032690_1	Insecta	Diptera	Tephritidae	Dacus	Arthropoda	F	H	16253	14774	-0.29	0.00836769	39.8	32.5	17.9	9.8	72.3	27.7	42.3	0.101	-0.293	-0.101	0.293	Dacus_longicornis_NC_032690_1	0.0909986	5	2.441	Dacus_longicornis_NC_032690	Dacus_longicornis_NC_032690	double
3	NC_057613.1	Pyrops candelaria	Pyrops_candelaria_NC_057613_1	Insecta	Hemiptera	Fulgoridae	Pyrops	Arthropoda	F	H	16253	14289	-0.214	0.0111979	47.1	26.2	15.9	10.8	73.3	26.7	37	0.286	-0.191	-0.286	0.191	Pyrops_candelaria_NC_057613_1	0.120839	5	3.592	Pyrops_candelaria_NC_057613	Pyrops_candelaria_NC_057613	double
3	NC_052890.1	Ochthebius minoicus	Ochthebius_minoicus_NC_052890_1	Insecta	Coleoptera	Hydraenidae	Ochthebius	Arthropoda	F	I	16252	14547	-0.188	0.0931578	41.7	38.3	11.9	8.1	80	20	46.4	0.042	-0.189	-0.042	0.189	Ochthebius_minoicus_NC_052890_1	0.10491	5	2.523	Ochthebius_minoicus_NC_052890	Ochthebius_minoicus_NC_052890	double
2	NC_057476.1	Scopimera intermedia	Scopimera_intermedia_NC_057476_1	Malacostraca	Decapoda	Dotillidae	Scopimera	Arthropoda	F	H	16252	14760	-0.226	0.0918041	35.3	33.7	18.9	12	69	30.9	45.7	0.023	-0.221	-0.023	0.221	Scopimera_intermedia_NC_057476_1	0.0918041	5	2.72	Scopimera_intermedia_NC_057476	Scopimera_intermedia_NC_057476	double
3	NC_046539.1	Parapleurus alliaceus	Parapleurus_alliaceus_NC_046539_1	Insecta	Orthoptera	Acrididae	Parapleurus	Arthropoda	F	H	16252	14774	-0.185	0.00492247	45.2	30.6	14.3	9.9	75.8	24.2	40.5	0.194	-0.181	-0.194	0.181	Parapleurus_alliaceus_NC_046539_1	0.0909427	5	2.726	Parapleurus_alliaceus_NC_046539	Parapleurus_alliaceus_NC_046539	double
3	NC_056774.1	Lethocerus indicus	Lethocerus_indicus_NC_056774_1	Insecta	Hemiptera	Belostomatidae	Lethocerus	Arthropoda	F	H	16251	14510	-0.217	0.0381515	44.8	26	18.1	11	70.8	29.1	37	0.265	-0.243	-0.265	0.243	Lethocerus_indicus_NC_056774_1	0.107132	5	2.884	Lethocerus_indicus_NC_056774	Lethocerus_indicus_NC_056774	double
3	NC_046538.1	Oedaleus abruptus	Oedaleus_abruptus_NC_046538_1	Insecta	Orthoptera	Acrididae	Oedaleus	Arthropoda	F	H	16251	14775	-0.185	0.00492277	45.2	30.6	14.3	9.9	75.8	24.2	40.5	0.194	-0.181	-0.194	0.181	Oedaleus_abruptus_NC_046538_1	0.0908252	5	2.726	Oedaleus_abruptus_NC_046538	Oedaleus_abruptus_NC_046538	double
3	NC_053745.1	Oxytauchira flange	Oxytauchira_flange_NC_053745_1	Insecta	Orthoptera	Acrididae	Oxytauchira	Arthropoda	F	H	16250	14697	-0.195	0.00449231	44.7	30.9	14.7	9.7	75.6	24.4	40.6	0.182	-0.204	-0.182	0.204	Oxytauchira_flange_NC_053745_1	0.0955692	5	2.801	Oxytauchira_flange_NC_053745	Oxytauchira_flange_NC_053745	double
3	NC_012421.1	Dysdercus cingulatus	Dysdercus_cingulatus_NC_012421_1	Insecta	Hemiptera	Pyrrhocoridae	Dysdercus	Arthropoda	F	H	16249	14512	-0.199	0.00738507	44.1	33.6	13.6	8.7	77.7	22.3	42.3	0.135	-0.22	-0.135	0.22	Dysdercus_cingulatus_NC_012421_1	0.106899	5	3.099	Dysdercus_cingulatus_NC_012421	Dysdercus_cingulatus_NC_012421	double
3	NC_027176.1	Sclerotia substriata	Sclerotia_substriata_NC_027176_1	Insecta	Coleoptera	Lampyridae	Sclerotia	Arthropoda	F	H	16248	14527	-0.176	0.00523141	44.1	34	12.9	9	78.1	21.9	43	0.129	-0.177	-0.129	0.177	Sclerotia_substriata_NC_027176_1	0.105921	5	2.698	Sclerotia_substriata_NC_027176	Sclerotia_substriata_NC_027176	double
4	NC_056882.1	Varuna litterata	Varuna_litterata_NC_056882_1	Malacostraca	Decapoda	Varunidae	Varuna	Arthropoda	F	H	16247	14787	-0.262	0.0893088	35.6	36.5	17.6	10.3	72.1	27.9	46.8	-0.012	-0.26	0.012	0.26	Varuna_litterata_NC_056882_1	0.0898627	5	2.725	Varuna_litterata_NC_056882	Varuna_litterata_NC_056882	double
3	NC_060343.1	Clinotanypus yani	Clinotanypus_yani_NC_060343_1	Insecta	Diptera	Chironomidae	Clinotanypus	Arthropoda	F	H	16247	14859	-0.195	0.0180341	38.2	37.2	14.8	9.8	75.4	24.6	47	0.014	-0.203	-0.014	0.203	Clinotanypus_yani_NC_060343_1	0.0854312	5	2.377	Clinotanypus_yani_NC_060343	Clinotanypus_yani_NC_060343	double
3	NC_008756.1	Cydistomyia duplonotata	Cydistomyia_duplonotata_NC_008756_1	Insecta	Diptera	Tabanidae	Cydistomyia	Arthropoda	MP	H	16247	14837	-0.172	0.0130486	39.1	38.8	13	9.1	77.9	22.1	47.9	0.003	-0.177	-0.003	0.177	Cydistomyia_duplonotata_NC_008756_1	0.0867853	5	2.32	Cydistomyia_duplonotata_NC_008756	Cydistomyia_duplonotata_NC_008756	double
3	NC_047467.1	Aulacophora indica	Aulacophora_indica_NC_047467_1	Insecta	Coleoptera	Chrysomelidae	Aulacophora	Arthropoda	F	H	16246	14504	-0.179	0.00566293	40.5	38.1	12.8	8.6	78.6	21.4	46.7	0.031	-0.195	-0.031	0.195	Aulacophora_indica_NC_047467_1	0.107226	5	2.678	Aulacophora_indica_NC_047467	Aulacophora_indica_NC_047467	double
3	NC_036283.1	Xylosandrus morigerus	Xylosandrus_morigerus_NC_036283_1	Insecta	Coleoptera	Curculionidae	Xylosandrus	Arthropoda	F	I	16246	14326	-0.244	0.10618	39.1	33.5	16.9	10.4	72.6	27.3	43.9	0.077	-0.239	-0.077	0.239	Xylosandrus_morigerus_NC_036283_1	0.118183	5	3.177	Xylosandrus_morigerus_NC_036283	Xylosandrus_morigerus_NC_036283	double
4	NC_033865.1	Helice latimera	Helice_latimera_NC_033865_1	Malacostraca	Decapoda	Varunidae	Helice	Arthropoda	F	H	16246	14752	-0.287	0.0914687	34	35.1	19.9	11	69.1	30.9	46.1	-0.017	-0.29	0.017	0.29	Helice_latimera_NC_033865_1	0.0919611	5	2.703	Helice_latimera_NC_033865	Helice_latimera_NC_033865	double
3	NC_024583.1	Orius sauteri	Orius_sauteri_NC_024583_1	Insecta	Hemiptera	Anthocoridae	Orius	Arthropoda	F	H	16246	14441	-0.087	0.00289302	43.5	33.2	12.8	10.5	76.7	23.3	43.7	0.134	-0.096	-0.134	0.096	Orius_sauteri_NC_024583_1	0.111104	5	2.855	Orius_sauteri_NC_024583	Orius_sauteri_NC_024583	double
3	NC_042911.1	Eristalinus aeneus	Eristalinus_aeneus_NC_042911_1	Insecta	Diptera	Syrphidae	Eristalinus	Arthropoda	F	H	16245	14748	-0.179	0.0144044	41.1	38.8	11.9	8.2	79.9	20.1	47	0.029	-0.181	-0.029	0.181	Eristalinus_aeneus_NC_042911_1	0.0921514	5	2.443	Eristalinus_aeneus_NC_042911	Eristalinus_aeneus_NC_042911	double
3	NC_053679.1	Calliphora nigribarbis	Calliphora_nigribarbis_NC_053679_1	Insecta	Diptera	Calliphoridae	Calliphora	Arthropoda	F	H	16241	14695	-0.17	0.00720399	39.6	37.9	13.2	9.3	77.5	22.5	47.2	0.022	-0.176	-0.022	0.176	Calliphora_nigribarbis_NC_053679_1	0.0951912	5	2.434	Calliphora_nigribarbis_NC_053679	Calliphora_nigribarbis_NC_053679	double
3	NC_051892.1	Arria pallida	Arria_pallida_NC_051892_1	Insecta	Mantodea	Thespidae	Arria	Arthropoda	F	H	16240	14742	-0.197	0.012931	40.2	38	13.1	8.7	78.2	21.8	46.7	0.028	-0.203	-0.028	0.203	Arria_pallida_NC_051892_1	0.0922414	5	2.776	Arria_pallida_NC_051892	Arria_pallida_NC_051892	double
3	NC_045075.1	Aphaena amabilis	Aphaena_amabilis_NC_045075_1	Insecta	Hemiptera	Fulgoridae	Aphaena	Arthropoda	F	H	16237	14306	-0.264	0.00381844	49.8	28.1	14	8.1	77.9	22.1	36.2	0.277	-0.264	-0.277	0.264	Aphaena_amabilis_NC_045075_1	0.118926	5	3.567	Aphaena_amabilis_NC_045075	Aphaena_amabilis_NC_045075	double
3	NC_016716.1	Liriomyza huidobrensis	Liriomyza_huidobrensis_NC_016716_1	Insecta	Diptera	Agromyzidae	Liriomyza	Arthropoda	F	H	16236	14754	-0.177	0.00406504	40.6	37.7	12.7	9	78.3	21.7	46.7	0.036	-0.17	-0.036	0.17	Liriomyza_huidobrensis_NC_016716_1	0.0912786	5	2.527	Liriomyza_huidobrensis_NC_016716	Liriomyza_huidobrensis_NC_016716	double
4	NC_036364.1	Lachesilla anna	Lachesilla_anna_NC_036364_1	Insecta	Psocoptera	Lachesillidae	Lachesilla	Arthropoda	F	H	16236	14447	-0.262	0.0103474	35.7	37.3	17.3	9.7	73	27	47	-0.021	-0.283	0.021	0.283	Lachesilla_anna_NC_036364_1	0.110187	5	2.995	Lachesilla_anna_NC_036364	Lachesilla_anna_NC_036364	double
3	NC_016176.1	Sylvicola fenestralis	Sylvicola_fenestralis_NC_016176_1	Insecta	Diptera	Anisopodidae	Sylvicola	Arthropoda	F	H	16234	14811	-0.144	0.0117654	37.9	38.4	13.5	10.1	76.3	23.6	48.5	-0.006	-0.144	0.006	0.144	Sylvicola_fenestralis_NC_016176_1	0.0853148	5	2.319	Sylvicola_fenestralis_NC_016176	Sylvicola_fenestralis_NC_016176	double
3	NC_053662.1	Calliphora sinensis	Calliphora_sinensis_NC_053662_1	Insecta	Diptera	Calliphoridae	Calliphora	Arthropoda	F	H	16234	14691	-0.165	0.00751509	39.4	38.2	13	9.4	77.6	22.4	47.6	0.015	-0.163	-0.015	0.163	Calliphora_sinensis_NC_053662_1	0.0950474	5	2.436	Calliphora_sinensis_NC_053662	Calliphora_sinensis_NC_053662	double
3	NC_042812.1	Placosternum urus	Placosternum_urus_NC_042812_1	Insecta	Hemiptera	Pentatomidae	Placosternum	Arthropoda	F	H	16233	14571	-0.117	0.00757716	43	35.2	12.2	9.6	78.2	21.8	44.8	0.1	-0.117	-0.1	0.117	Placosternum_urus_NC_042812_1	0.102384	5	3.012	Placosternum_urus_NC_042812	Placosternum_urus_NC_042812	double
3	NC_042945.1	Diorhabda carinata	Diorhabda_carinata_NC_042945_1	Insecta	Coleoptera	Chrysomelidae	Diorhabda	Arthropoda	F	H	16232	14444	-0.172	0.0933342	40.2	37.7	13.1	9	77.9	22.1	46.7	0.033	-0.184	-0.033	0.184	Diorhabda_carinata_NC_042945_1	0.110153	5	2.651	Diorhabda_carinata_NC_042945	Diorhabda_carinata_NC_042945	double
3	NC_052695.1	Tropidocephala brunnipennis	Tropidocephala_brunnipennis_NC_052695_1	Insecta	Hemiptera	Delphacidae	Tropidocephala	Arthropoda	F	H	16231	14218	-0.236	0.0327768	45.1	35.5	12.1	7.3	80.6	19.4	42.8	0.119	-0.248	-0.119	0.248	Tropidocephala_brunnipennis_NC_052695_1	0.124022	5	3.769	Tropidocephala_brunnipennis_NC_052695	Tropidocephala_brunnipennis_NC_052695	double
3	NC_051975.1	Melanostoma orientale	Melanostoma_orientale_NC_051975_1	Insecta	Diptera	Syrphidae	Melanostoma	Arthropoda	F	H	16229	14791	-0.119	0.0103518	41	40.3	10.6	8.1	81.3	18.7	48.4	0.008	-0.131	-0.008	0.131	Melanostoma_orientale_NC_051975_1	0.0886068	5	2.468	Melanostoma_orientale_NC_051975	Melanostoma_orientale_NC_051975	double
3	NC_022449.1	Eusthenes cupreus	Eusthenes_cupreus_NC_022449_1	Insecta	Hemiptera	Tessaratomidae	Eusthenes	Arthropoda	F	H	16229	14547	-0.094	0.00998213	42	32.1	14.3	11.6	74.1	25.9	43.7	0.133	-0.103	-0.133	0.103	Eusthenes_cupreus_NC_022449_1	0.103642	5	2.93	Eusthenes_cupreus_NC_022449	Eusthenes_cupreus_NC_022449	double
3	NC_031379.1	Fruhstorferiola huayinensis	Fruhstorferiola_huayinensis_NC_031379_1	Insecta	Orthoptera	Acrididae	Fruhstorferiola	Arthropoda	F	H	16227	14768	-0.15	0.00573119	43	32.6	14.1	10.3	75.6	24.4	42.9	0.137	-0.157	-0.137	0.157	Fruhstorferiola_huayinensis_NC_031379_1	0.0899119	5	2.659	Fruhstorferiola_huayinensis_NC_031379	Fruhstorferiola_huayinensis_NC_031379	double
3	NC_034773.1	Pseudophyllus titan	Pseudophyllus_titan_NC_034773_1	Insecta	Orthoptera	Tettigoniidae	Pseudophyllus	Arthropoda	F	H	16227	14847	-0.333	0.0237259	39.1	33	18.8	9.1	72.1	27.9	42.1	0.084	-0.345	-0.084	0.345	Pseudophyllus_titan_NC_034773_1	0.0850434	5	2.66	Pseudophyllus_titan_NC_034773	Pseudophyllus_titan_NC_034773	double
3	NC_039981.1	Xiphidiopsis gurneyi	Xiphidiopsis_gurneyi_NC_039981_1	Insecta	Orthoptera	Tettigoniidae	Xiphidiopsis	Arthropoda	F	H	16225	14719	-0.304	0.00357473	36.2	31.3	21.3	11.2	67.5	32.5	42.5	0.073	-0.311	-0.073	0.311	Xiphidiopsis_gurneyi_NC_039981_1	0.0928197	5	2.354	Xiphidiopsis_gurneyi_NC_039981	Xiphidiopsis_gurneyi_NC_039981	double
4	NC_026561.1	Faxonius limosus	Faxonius_limosus_NC_026561_1	Malacostraca	Decapoda	Cambaridae	Faxonius	Arthropoda	F	H	16223	14618	0.287	0.098872	31.5	39.8	10.3	18.4	71.3	28.7	58.2	-0.116	0.282	0.116	-0.282	Faxonius_limosus_NC_026561_1	0.0989336	5	2.771	Faxonius_limosus_NC_026561	Faxonius_limosus_NC_026561	double
3	NC_024856.1	Scathophaga stercoraria	Scathophaga_stercoraria_NC_024856_1	Insecta	Diptera	Scathophagidae	Scathophaga	Arthropoda	F	H	16223	14741	-0.144	0.00456143	39.6	38.8	12.3	9.3	78.4	21.6	48.1	0.009	-0.142	-0.009	0.142	Scathophaga_stercoraria_NC_024856_1	0.0913518	5	2.422	Scathophaga_stercoraria_NC_024856	Scathophaga_stercoraria_NC_024856	double
4	NC_039108.1	Pilumnus vespertilio	Pilumnus_vespertilio_NC_039108_1	Malacostraca	Decapoda	Pilumnidae	Pilumnus	Arthropoda	F	H	16222	14798	-0.268	0.0877204	35.3	35.8	18.5	10.4	71.1	28.9	46.2	-0.008	-0.277	0.008	0.277	Pilumnus_vespertilio_NC_039108_1	0.087782	5	2.71	Pilumnus_vespertilio_NC_039108	Pilumnus_vespertilio_NC_039108	double
3	NC_056921.1	Balala fujiana	Balala_fujiana_NC_056921_1	Insecta	Hemiptera	Cicadellidae	Balala	Arthropoda	F	H	16221	14228	-0.198	0.00104802	47.3	30.1	13.4	9.2	77.4	22.6	39.3	0.223	-0.185	-0.223	0.185	Balala_fujiana_NC_056921_1	0.122865	5	3.476	Balala_fujiana_NC_056921	Balala_fujiana_NC_056921	double
3	NC_021415.1	Thyridosmylus langii	Thyridosmylus_langii_NC_021415_1	Insecta	Neuroptera	Osmylidae	Thyridosmylus	Arthropoda	F	H	16221	14728	-0.2	0.007891	37.8	38.9	14.1	9.2	76.7	23.3	48.1	-0.015	-0.209	0.015	0.209	Thyridosmylus_langii_NC_021415_1	0.0920412	5	2.386	Thyridosmylus_langii_NC_021415	Thyridosmylus_langii_NC_021415	double
3	NC_042875.1	Altica fragariae	Altica_fragariae_NC_042875_1	Insecta	Coleoptera	Chrysomelidae	Altica	Arthropoda	F	H	16220	14474	-0.201	0.00363749	40.2	37.8	13.4	8.6	78	22	46.4	0.031	-0.218	-0.031	0.218	Altica_fragariae_NC_042875_1	0.107645	5	2.853	Altica_fragariae_NC_042875	Altica_fragariae_NC_042875	double
4	NC_016925.1	Cambaroides similis	Cambaroides_similis_NC_016925_1	Malacostraca	Decapoda	Cambaridae	Cambaroides	Arthropoda	F	H	16220	14596	0.209	0.100123	32.8	38.8	11.2	17.2	71.6	28.4	56	-0.084	0.212	0.084	-0.212	Cambaroides_similis_NC_016925_1	0.100123	5	2.713	Cambaroides_similis_NC_016925	Cambaroides_similis_NC_016925	double
3	NC_044849.1	Dermestes tessellatocollis	Dermestes_tessellatocollis_NC_044849_1	Insecta	Coleoptera	Dermestidae	Dermestes	Arthropoda	F	H	16218	12940	-0.201	0.10772	41.2	35.6	13.8	9.4	76.8	23.2	45	0.073	-0.19	-0.073	0.19	Dermestes_tessellatocollis_NC_044849_1	0.111974	5	2.731	Dermestes_tessellatocollis_NC_044849	Dermestes_tessellatocollis_NC_044849	double
3	NC_060743.1	Anchon lineatum	Anchon_lineatum_NC_060743_1	Insecta	Hemiptera	Membracidae	Anchon	Arthropoda	F	H	16218	14265	-0.243	0.000801578	45.3	31.1	14.4	9.2	76.4	23.6	40.3	0.186	-0.218	-0.186	0.218	Anchon_lineatum_NC_060743_1	0.120422	5	3.443	Anchon_lineatum_NC_060743	Anchon_lineatum_NC_060743	double
3	NC_013580.1	Acmaeodera sp. NCS-2009	Acmaeodera_sp__NCS_2009_NC_013580_1	Insecta	Coleoptera	Buprestidae	Acmaeodera	Arthropoda	F	H	16217	14636	-0.249	0.00295986	38.1	30.3	19.7	11.9	68.4	31.6	42.2	0.114	-0.249	-0.114	0.249	Acmaeodera_sp__NCS_2009_NC_013580_1	0.0974903	5	2.604	Acmaeodera_sp__NCS_2009_NC_013580	Acmaeodera_sp__NCS_2009_NC_013580	double
3	NC_023469.1	Henosepilachna pusillanima	Henosepilachna_pusillanima_NC_023469_1	Insecta	Coleoptera	Coccinellidae	Henosepilachna	Arthropoda	F	H	16216	14160	-0.179	0.0202886	40.2	38	13.1	8.7	78.2	21.8	46.7	0.028	-0.199	-0.028	0.199	Henosepilachna_pusillanima_NC_023469_1	0.126788	5	2.989	Henosepilachna_pusillanima_NC_023469	Henosepilachna_pusillanima_NC_023469	double
4	NC_033508.1	Orconectes luteus	Orconectes_luteus_NC_033508_1	Malacostraca	Decapoda	Cambaridae	Orconectes	Arthropoda	F	H	16215	14403	0.296	0.111687	30.6	39.3	10.8	19.3	69.9	30.1	58.6	-0.125	0.283	0.125	-0.283	Orconectes_luteus_NC_033508_1	0.111748	5	2.767	Orconectes_luteus_NC_033508	Orconectes_luteus_NC_033508	double
3	NC_058587.1	Tanypus punctipennis	Tanypus_punctipennis_NC_058587_1	Insecta	Diptera	Chironomidae	Tanypus	Arthropoda	F	H	16215	14870	-0.164	0.0244835	39.5	36.2	14.3	10.1	75.7	24.4	46.3	0.044	-0.173	-0.044	0.173	Tanypus_punctipennis_NC_058587_1	0.0244835	5	2.38	Tanypus_punctipennis_NC_058587	Tanypus_punctipennis_NC_058587	double
3	NC_059845.1	Arcynopteryx dichroa	Arcynopteryx_dichroa_NC_059845_1	Insecta	Plecoptera	Perlodidae	Arcynopteryx	Arthropoda	F	H	16215	14800	-0.238	0.012951	36.5	32.8	19	11.7	69.3	30.7	44.5	0.053	-0.239	-0.053	0.239	Arcynopteryx_dichroa_NC_059845_1	0.0872649	5	2.394	Arcynopteryx_dichroa_NC_059845	Arcynopteryx_dichroa_NC_059845	double
3	NC_015095.1	Apochrysa matsumurae	Apochrysa_matsumurae_NC_015095_1	Insecta	Neuroptera	Chrysopidae	Apochrysa	Arthropoda	F	H	16214	14656	-0.155	0.00918959	38.1	41	12.4	8.6	79.1	21	49.6	-0.036	-0.178	0.036	0.178	Apochrysa_matsumurae_NC_015095_1	0.0960898	5	2.372	Apochrysa_matsumurae_NC_015095	Apochrysa_matsumurae_NC_015095	double
3	NC_042439.1	Dindymus rubiginosus	Dindymus_rubiginosus_NC_042439_1	Insecta	Hemiptera	Pyrrhocoridae	Dindymus	Arthropoda	F	H	16213	14533	-0.225	0.00752483	42.4	32.9	15.3	9.4	75.3	24.7	42.3	0.126	-0.236	-0.126	0.236	Dindymus_rubiginosus_NC_042439_1	0.103621	5	3.092	Dindymus_rubiginosus_NC_042439	Dindymus_rubiginosus_NC_042439	double
3	NC_052905.1	Ochthebius uniformis	Ochthebius_uniformis_NC_052905_1	Insecta	Coleoptera	Hydraenidae	Ochthebius	Arthropoda	F	I	16212	14569	-0.149	0.0925241	41.1	39.3	11.3	8.3	80.4	19.6	47.6	0.022	-0.153	-0.022	0.153	Ochthebius_uniformis_NC_052905_1	0.101345	5	2.538	Ochthebius_uniformis_NC_052905	Ochthebius_uniformis_NC_052905	double
4	NC_030197.1	Helice tientsinensis	Helice_tientsinensis_NC_030197_1	Malacostraca	Decapoda	Varunidae	Helice	Arthropoda	F	H	16212	14752	-0.287	0.0895633	33.9	35.1	19.9	11	69	30.9	46.1	-0.017	-0.289	0.017	0.289	Helice_tientsinensis_NC_030197_1	0.0900567	5	2.704	Helice_tientsinensis_NC_030197	Helice_tientsinensis_NC_030197	double
3	NC_058974.1	Poecilocoris druraei	Poecilocoris_druraei_NC_058974_1	Insecta	Hemiptera	Scutelleridae	Poecilocoris	Arthropoda	F	H	16207	14629	-0.164	0.0324551	42	31.8	15.3	10.9	73.8	26.2	42.7	0.139	-0.169	-0.139	0.169	Poecilocoris_druraei_NC_058974_1	0.0973653	5	2.988	Poecilocoris_druraei_NC_058974	Poecilocoris_druraei_NC_058974	double
3	NC_044786.1	Lamprigera yunnana	Lamprigera_yunnana_NC_044786_1	Insecta	Coleoptera	Lampyridae	Lamprigera	Arthropoda	F	H	16203	14437	-0.223	0.108992	43.1	36.2	12.8	7.9	79.3	20.7	44.1	0.088	-0.234	-0.088	0.234	Lamprigera_yunnana_NC_044786_1	0.108992	5	3.098	Lamprigera_yunnana_NC_044786	Lamprigera_yunnana_NC_044786	double
3	NC_041198.1	Greenidea psidii	Greenidea_psidii_NC_041198_1	Insecta	Hemiptera	Aphididae	Greenidea	Arthropoda	F	I	16202	14427	-0.249	0.109493	46.2	39.2	9.1	5.5	85.4	14.6	44.7	0.082	-0.251	-0.082	0.251	Greenidea_psidii_NC_041198_1	0.109554	5	3.972	Greenidea_psidii_NC_041198	Greenidea_psidii_NC_041198	double
3	NC_052908.1	Eristalinus quinquestriatus	Eristalinus_quinquestriatus_NC_052908_1	Insecta	Diptera	Syrphidae	Eristalinus	Arthropoda	F	H	16198	14751	-0.162	0.010063	41.2	39.4	11.4	8.1	80.6	19.5	47.5	0.022	-0.167	-0.022	0.167	Eristalinus_quinquestriatus_NC_052908_1	0.089332	5	2.452	Eristalinus_quinquestriatus_NC_052908	Eristalinus_quinquestriatus_NC_052908	double
3	NC_010532.1	Trigoniophthalmus alternatus	Trigoniophthalmus_alternatus_NC_010532_1	Insecta	Archaeognatha	Machilidae	Trigoniophthalmus	Arthropoda	F	H	16197	14816	-0.287	0.0142619	38.9	32.6	18.4	10.2	71.5	28.6	42.8	0.088	-0.289	-0.088	0.289	Trigoniophthalmus_alternatus_NC_010532_1	0.0852627	5	2.419	Trigoniophthalmus_alternatus_NC_010532	Trigoniophthalmus_alternatus_NC_010532	double
3	NC_054235.1	Eretes sticticus	Eretes_sticticus_NC_054235_1	Insecta	Coleoptera	Dytiscidae	Eretes	Arthropoda	F	H	16196	14437	-0.155	0.0292047	40.2	39.3	11.9	8.6	79.5	20.5	47.9	0.011	-0.159	-0.011	0.159	Eretes_sticticus_NC_054235_1	0.108607	5	2.375	Eretes_sticticus_NC_054235	Eretes_sticticus_NC_054235	double
3	NC_060602.1	Ophrygonius sp.	Ophrygonius_sp__NC_060602_1	Insecta	Coleoptera	Passalidae	Ophrygonius	Arthropoda	F	H	16195	14326	-0.298	0.00426057	40.1	38.5	14.1	7.3	78.6	21.4	45.8	0.02	-0.315	-0.02	0.315	Ophrygonius_sp__NC_060602_1	0.115406	5	3.233	Ophrygonius_sp__NC_060602	Ophrygonius_sp__NC_060602	double
3	NC_056126.1	Popillia mutans	Popillia_mutans_NC_056126_1	Insecta	Coleoptera	Scarabaeidae	Popillia	Arthropoda	F	H	16192	14652	-0.212	0.00265563	38.6	37.3	14.7	9.3	75.9	24	46.6	0.017	-0.223	-0.017	0.223	Popillia_mutans_NC_056126_1	0.0951087	5	2.516	Popillia_mutans_NC_056126	Popillia_mutans_NC_056126	double
3	NC_045269.1	Pseudeuphausia sinica	Pseudeuphausia_sinica_NC_045269_1	Malacostraca	Euphausiacea	Euphausiidae	Pseudeuphausia	Arthropoda	F	H	16192	14556	-0.175	0.100914	38.4	33.4	16.6	11.7	71.8	28.3	45.1	0.07	-0.174	-0.07	0.174	Pseudeuphausia_sinica_NC_045269_1	0.101038	5	2.416	Pseudeuphausia_sinica_NC_045269	Pseudeuphausia_sinica_NC_045269	double
3	NC_042430.1	Pyrrhopeplus posthumus	Pyrrhopeplus_posthumus_NC_042430_1	Insecta	Hemiptera	Pyrrhocoridae	Pyrrhopeplus	Arthropoda	F	H	16192	14518	-0.222	0.0101902	42	32.4	15.8	9.8	74.4	25.6	42.2	0.129	-0.236	-0.129	0.236	Pyrrhopeplus_posthumus_NC_042430_1	0.103384	5	3.064	Pyrrhopeplus_posthumus_NC_042430	Pyrrhopeplus_posthumus_NC_042430	double
3	NC_042433.1	Physopelta cincticollis	Physopelta_cincticollis_NC_042433_1	Insecta	Hemiptera	Largidae	Physopelta	Arthropoda	F	H	16191	14418	-0.213	0.01822	44.4	29.8	15.6	10.1	74.2	25.7	39.9	0.196	-0.213	-0.196	0.213	Physopelta_cincticollis_NC_042433_1	0.109505	5	3.024	Physopelta_cincticollis_NC_042433	Physopelta_cincticollis_NC_042433	double
3	NC_047419.1	Meitanaphis microgallis	Meitanaphis_microgallis_NC_047419_1	Insecta	Hemiptera	Pemphigidae	Meitanaphis	Arthropoda	F	H	16191	14397	-0.283	0.110802	44.8	39.6	10	5.7	84.4	15.7	45.3	0.062	-0.278	-0.062	0.278	Meitanaphis_microgallis_NC_047419_1	0.110802	5	3.959	Meitanaphis_microgallis_NC_047419	Meitanaphis_microgallis_NC_047419	double
3	NC_035315.1	Meitanaphis elongallis	Meitanaphis_elongallis_NC_035315_1	Insecta	Hemiptera	Pemphigidae	Meitanaphis	Arthropoda	F	H	16191	14396	-0.291	0.110864	44.8	39.4	10.1	5.7	84.2	15.8	45.1	0.063	-0.283	-0.063	0.283	Meitanaphis_elongallis_NC_035315_1	0.110864	5	3.954	Meitanaphis_elongallis_NC_035315	Meitanaphis_elongallis_NC_035315	double
3	NC_060344.1	Prodiamesa olivacea	Prodiamesa_olivacea_NC_060344_1	Insecta	Diptera	Chironomidae	Prodiamesa	Arthropoda	F	H	16190	14856	-0.135	0.0157505	38.7	37.3	13.6	10.3	76	23.9	47.6	0.018	-0.139	-0.018	0.139	Prodiamesa_olivacea_NC_060344_1	0.0823965	5	2.35	Prodiamesa_olivacea_NC_060344	Prodiamesa_olivacea_NC_060344	double
3	NC_039964.1	Pleoticus muelleri	Pleoticus_muelleri_NC_039964_1	Malacostraca	Decapoda	Solenoceridae	Pleoticus	Arthropoda	F	H	16189	14742	-0.243	0.0120452	35.1	33.2	19.8	12	68.3	31.8	45.2	0.028	-0.245	-0.028	0.245	Pleoticus_muelleri_NC_039964_1	0.0893817	5	2.379	Pleoticus_muelleri_NC_039964	Pleoticus_muelleri_NC_039964	double
3	NC_057210.1	Dicraeus orientalis	Dicraeus_orientalis_NC_057210_1	Insecta	Diptera	Chloropidae	Dicraeus	Arthropoda	F	H	16188	14713	-0.158	0.0159377	41	38.1	12.2	8.7	79.1	20.9	46.8	0.036	-0.17	-0.036	0.17	Dicraeus_orientalis_NC_057210_1	0.0911169	5	2.449	Dicraeus_orientalis_NC_057210	Dicraeus_orientalis_NC_057210	double
3	NC_060358.1	Cerceris quinquefasciata	Cerceris_quinquefasciata_NC_060358_1	Insecta	Hymenoptera	Crabronidae	Cerceris	Arthropoda	F	H	16188	14739	-0.236	0.0257598	43	41.1	9.9	6	84.1	15.9	47.1	0.023	-0.243	-0.023	0.243	Cerceris_quinquefasciata_NC_060358_1	0.0895107	5	4.131	Cerceris_quinquefasciata_NC_060358	Cerceris_quinquefasciata_NC_060358	double
3	NC_035061.1	Aquatica wuhana	Aquatica_wuhana_NC_035061_1	Insecta	Coleoptera	Lampyridae	Aquatica	Arthropoda	F	H	16186	14493	-0.186	0.00586927	42.9	35.6	12.9	8.6	78.5	21.5	44.2	0.093	-0.199	-0.093	0.199	Aquatica_wuhana_NC_035061_1	0.104597	5	2.763	Aquatica_wuhana_NC_035061	Aquatica_wuhana_NC_035061	double
3	NC_050969.1	Syrphus vitripennis	Syrphus_vitripennis_NC_050969_1	Insecta	Diptera	Syrphidae	Syrphus	Arthropoda	F	H	16185	14716	-0.13	0.019895	40.6	40.4	10.8	8.2	81	19	48.6	0.002	-0.136	-0.002	0.136	Syrphus_vitripennis_NC_050969_1	0.0907631	5	2.462	Syrphus_vitripennis_NC_050969	Syrphus_vitripennis_NC_050969	double
4	NC_050045.1	Cyclograpsus intermedius	Cyclograpsus_intermedius_NC_050045_1	Malacostraca	Decapoda	Varunidae	Cyclograpsus	Arthropoda	F	H	16184	14753	-0.268	0.0878028	34.7	35.9	18.7	10.7	70.6	29.4	46.6	-0.017	-0.27	0.017	0.27	Cyclograpsus_intermedius_NC_050045_1	0.0884207	5	2.69	Cyclograpsus_intermedius_NC_050045	Cyclograpsus_intermedius_NC_050045	double
3	NC_054303.1	Dermanyssus gallinae	Dermanyssus_gallinae_NC_054303_1	Arachnida	Mesostigmata	Dermanyssidae	Dermanyssus	Arthropoda	MP	L	16184	14041	-0.192	0.0158799	41	39.7	11.4	7.9	80.7	19.3	47.6	0.016	-0.18	-0.016	0.18	Dermanyssus_gallinae_NC_054303_1	0.132415	5	4.796	Dermanyssus_gallinae_NC_054303	Dermanyssus_gallinae_NC_054303	double
3	NC_016713.1	Liriomyza bryoniae	Liriomyza_bryoniae_NC_016713_1	Insecta	Diptera	Agromyzidae	Liriomyza	Arthropoda	F	H	16183	14760	-0.192	0.00426373	41.2	38.1	12.4	8.3	79.3	20.7	46.4	0.04	-0.2	-0.04	0.2	Liriomyza_bryoniae_NC_016713_1	0.0879318	5	2.543	Liriomyza_bryoniae_NC_016713	Liriomyza_bryoniae_NC_016713	double
3	NC_052891.1	Ochthebius atriceps	Ochthebius_atriceps_NC_052891_1	Insecta	Coleoptera	Hydraenidae	Ochthebius	Arthropoda	F	I	16182	14543	-0.168	0.0570387	41.2	38.3	12	8.4	79.5	20.4	46.7	0.036	-0.175	-0.036	0.175	Ochthebius_atriceps_NC_052891_1	0.101285	5	2.45	Ochthebius_atriceps_NC_052891	Ochthebius_atriceps_NC_052891	double
3	NC_014678.1	Phobaeticus serratipes	Phobaeticus_serratipes_NC_014678_1	Insecta	Phasmatodea	Phasmatidae	Phobaeticus	Arthropoda	F	H	16182	14534	-0.229	0.00247188	45.9	31.1	14	9	77	23	40.1	0.192	-0.219	-0.192	0.219	Phobaeticus_serratipes_NC_014678_1	0.101842	5	2.894	Phobaeticus_serratipes_NC_014678	Phobaeticus_serratipes_NC_014678	double
3	NC_052903.1	Ochthebius scopuli	Ochthebius_scopuli_NC_052903_1	Insecta	Coleoptera	Hydraenidae	Ochthebius	Arthropoda	F	I	16181	14538	-0.176	0.100426	40.8	37.9	12.5	8.8	78.7	21.3	46.7	0.036	-0.177	-0.036	0.177	Ochthebius_scopuli_NC_052903_1	0.101539	5	2.481	Ochthebius_scopuli_NC_052903	Ochthebius_scopuli_NC_052903	double
3	NC_054319.1	Aedes alboannulatus	Aedes_alboannulatus_NC_054319_1	Insecta	Diptera	Culicidae	Aedes	Arthropoda	MP	H	16181	14809	-0.165	0.0185403	40.9	38.1	12.4	8.6	79	21	46.7	0.037	-0.177	-0.037	0.177	Aedes_alboannulatus_NC_054319_1	0.0847908	5	2.468	Aedes_alboannulatus_NC_054319	Aedes_alboannulatus_NC_054319	double
3	NC_037201.1	Atergatis floridus	Atergatis_floridus_NC_037201_1	Malacostraca	Decapoda	Xanthidae	Atergatis	Arthropoda	F	H	16180	14694	-0.308	0.0918418	33.4	35.9	20.3	10.5	69.3	30.8	46.4	-0.036	-0.319	0.036	0.319	Atergatis_floridus_NC_037201_1	0.0918418	5	2.722	Atergatis_floridus_NC_037201	Atergatis_floridus_NC_037201	double
3	NC_015075.1	Pristomyrmex punctatus	Pristomyrmex_punctatus_NC_015075_1	Insecta	Hymenoptera	Formicidae	Pristomyrmex	Arthropoda	F	H	16180	14630	-0.385	0.0413473	39	40.7	14.2	6.1	79.7	20.3	46.8	-0.021	-0.401	0.021	0.401	Pristomyrmex_punctatus_NC_015075_1	0.0957973	5	4.364	Pristomyrmex_punctatus_NC_015075	Pristomyrmex_punctatus_NC_015075	double
3	NC_012449.1	Coptosoma bifaria	Coptosoma_bifaria_NC_012449_1	Insecta	Hemiptera	Plataspidae	Coptosoma	Arthropoda	F	I	16179	14536	-0.12	0.00358489	40.9	30.4	16.2	12.5	71.3	28.7	42.9	0.147	-0.13	-0.147	0.13	Coptosoma_bifaria_NC_012449_1	0.101551	5	3.121	Coptosoma_bifaria_NC_012449	Coptosoma_bifaria_NC_012449	double
3	NC_047285.1	Myrmeleon formicarius	Myrmeleon_formicarius_NC_047285_1	Insecta	Neuroptera	Myrmeleontidae	Myrmeleon	Arthropoda	F	H	16179	14652	-0.178	0.00883862	38.9	35.9	14.9	10.3	74.8	25.2	46.2	0.041	-0.182	-0.041	0.182	Myrmeleon_formicarius_NC_047285_1	0.0943816	5	2.379	Myrmeleon_formicarius_NC_047285	Myrmeleon_formicarius_NC_047285	double
3	NC_060357.1	Cerceris bucculata	Cerceris_bucculata_NC_060357_1	Insecta	Hymenoptera	Crabronidae	Cerceris	Arthropoda	F	H	16178	14715	-0.244	0.0190382	42.9	40.5	10.5	6.2	83.4	16.7	46.7	0.028	-0.259	-0.028	0.259	Cerceris_bucculata_NC_060357_1	0.0904314	5	4.15	Cerceris_bucculata_NC_060357	Cerceris_bucculata_NC_060357	double
3	NC_024264.1	Peirates arcuatus	Peirates_arcuatus_NC_024264_1	Insecta	Hemiptera	Reduviidae	Peirates	Arthropoda	F	H	16176	14550	-0.165	0.00457468	40.2	31.1	16.9	11.8	71.3	28.7	42.9	0.128	-0.176	-0.128	0.176	Peirates_arcuatus_NC_024264_1	0.100519	5	2.886	Peirates_arcuatus_NC_024264	Peirates_arcuatus_NC_024264	double
3	NC_041083.1	Liriomyza chinensis	Liriomyza_chinensis_NC_041083_1	Insecta	Diptera	Agromyzidae	Liriomyza	Arthropoda	F	H	16175	14738	-0.179	0.00426584	41.3	37	12.8	8.9	78.3	21.7	45.9	0.056	-0.178	-0.056	0.178	Liriomyza_chinensis_NC_041083_1	0.088779	5	2.542	Liriomyza_chinensis_NC_041083	Liriomyza_chinensis_NC_041083	double
3	NC_042770.1	Fucellia costalis	Fucellia_costalis_NC_042770_1	Insecta	Diptera	Anthomyiidae	Fucellia	Arthropoda	F	H	16175	14754	-0.144	0.00395672	40	38.1	12.5	9.4	78.1	21.9	47.5	0.023	-0.139	-0.023	0.139	Fucellia_costalis_NC_042770_1	0.0878516	5	2.419	Fucellia_costalis_NC_042770	Fucellia_costalis_NC_042770	double
3	NC_036481.1	Episyrphus balteatus	Episyrphus_balteatus_NC_036481_1	Insecta	Diptera	Syrphidae	Episyrphus	Arthropoda	F	H	16175	14814	-0.123	0.0143431	40.3	40.5	10.8	8.4	80.8	19.2	48.9	-0.003	-0.124	0.003	0.124	Episyrphus_balteatus_NC_036481_1	0.0841422	5	2.468	Episyrphus_balteatus_NC_036481	Episyrphus_balteatus_NC_036481	double
3	NC_057252.1	Fieberiella septentrionalis	Fieberiella_septentrionalis_NC_057252_1	Insecta	Hemiptera	Cicadellidae	Fieberiella	Arthropoda	F	H	16175	14341	-0.157	0.00340031	42.5	35.4	12.6	9.5	77.9	22.1	44.9	0.091	-0.139	-0.091	0.139	Fieberiella_septentrionalis_NC_057252_1	0.113385	5	3.155	Fieberiella_septentrionalis_NC_057252	Fieberiella_septentrionalis_NC_057252	double
5	NC_025957.1	Paranephrops planifrons	Paranephrops_planifrons_NC_025957_1	Malacostraca	Decapoda	Parastacidae	Paranephrops	Arthropoda	F	H	16174	14705	-0.359	0.0905156	34.5	33.6	21.9	10	68.1	31.9	43.6	0.012	-0.374	-0.012	0.374	Paranephrops_planifrons_NC_025957_1	0.0908248	5	2.73	Paranephrops_planifrons_NC_025957	Paranephrops_planifrons_NC_025957	double
4	NC_039618.1	Echinoecus nipponicus	Echinoecus_nipponicus_NC_039618_1	Malacostraca	Decapoda	Pilumnidae	Echinoecus	Arthropoda	F	H	16173	14756	-0.284	0.0874915	35.6	35.6	18.5	10.2	71.2	28.7	45.8	-0.001	-0.288	0.001	0.288	Echinoecus_nipponicus_NC_039618_1	0.0876152	5	2.75	Echinoecus_nipponicus_NC_039618	Echinoecus_nipponicus_NC_039618	double
3	NC_018094.1	Thitarodes renzhiensis	Thitarodes_renzhiensis_NC_018094_1	Insecta	Lepidoptera	Hepialidae	Thitarodes	Arthropoda	F	H	16173	14757	-0.202	0.00302974	41.1	40.2	11.2	7.5	81.3	18.7	47.7	0.011	-0.194	-0.011	0.194	Thitarodes_renzhiensis_NC_018094_1	0.0875533	5	2.471	Thitarodes_renzhiensis_NC_018094	Thitarodes_renzhiensis_NC_018094	double
3	NC_059036.1	Propsilocerus paradoxus	Propsilocerus_paradoxus_NC_059036_1	Insecta	Diptera	Chironomidae	Propsilocerus	Arthropoda	F	H	16172	14870	-0.162	0.0148405	38.3	36.8	14.5	10.4	75.1	24.9	47.2	0.021	-0.168	-0.021	0.168	Propsilocerus_paradoxus_NC_059036_1	0.0148405	5	2.409	Propsilocerus_paradoxus_NC_059036	Propsilocerus_paradoxus_NC_059036	double
3	NC_013582.1	Apatides fortis	Apatides_fortis_NC_013582_1	Insecta	Coleoptera	Bostrichidae	Apatides	Arthropoda	F	H	16171	14502	-0.283	0.00265908	39.3	27.9	21.2	11.6	67.2	32.8	39.5	0.17	-0.295	-0.17	0.295	Apatides_fortis_NC_013582_1	0.103209	5	2.639	Apatides_fortis_NC_013582	Apatides_fortis_NC_013582	double
3	NC_034922.1	Cestrotus liui	Cestrotus_liui_NC_034922_1	Insecta	Diptera	Lauxaniidae	Cestrotus	Arthropoda	F	H	16171	14767	-0.156	0.0085338	38.6	38.1	13.5	9.8	76.7	23.3	47.9	0.006	-0.16	-0.006	0.16	Cestrotus_liui_NC_034922_1	0.0868221	5	2.398	Cestrotus_liui_NC_034922	Cestrotus_liui_NC_034922	double
3	NC_046769.1	Trichosia lengersdorfi	Trichosia_lengersdorfi_NC_046769_1	Insecta	Diptera	Sciaridae	Trichosia	Arthropoda	F	H	16171	14931	-0.23	0.0333931	40.9	38.5	12.6	8	79.4	20.6	46.5	0.03	-0.224	-0.03	0.224	Trichosia_lengersdorfi_NC_046769_1	0.0766805	5	2.57	Trichosia_lengersdorfi_NC_046769	Trichosia_lengersdorfi_NC_046769	double
4	NC_030048.1	Macrophthalmus japonicus	Macrophthalmus_japonicus_NC_030048_1	Malacostraca	Decapoda	Macrophthalmidae	Macrophthalmus	Arthropoda	F	H	16170	14774	-0.335	0.036611	33.6	32.7	22.7	10.9	66.3	33.6	43.6	0.014	-0.349	-0.014	0.349	Macrophthalmus_japonicus_NC_030048_1	0.0863327	5	2.757	Macrophthalmus_japonicus_NC_030048	Macrophthalmus_japonicus_NC_030048	double
3	NC_028603.1	Margarinotus merdarius	Margarinotus_merdarius_NC_028603_1	Insecta	Coleoptera	Histeridae	Margarinotus	Arthropoda	F	H	16169	14365	-0.169	0.0147814	35.1	29.8	20.5	14.6	64.9	35.1	44.4	0.083	-0.166	-0.083	0.166	Margarinotus_merdarius_NC_028603_1	0.111572	5	2.638	Margarinotus_merdarius_NC_028603	Margarinotus_merdarius_NC_028603	double
3	NC_050997.1	Cletus punctiger	Cletus_punctiger_NC_050997_1	Insecta	Hemiptera	Coreidae	Cletus	Arthropoda	F	H	16166	14499	-0.162	0.00179389	41.9	31.5	15.9	10.7	73.4	26.6	42.2	0.142	-0.196	-0.142	0.196	Cletus_punctiger_NC_050997_1	0.103118	5	2.919	Cletus_punctiger_NC_050997	Cletus_punctiger_NC_050997	double
3	NC_060341.1	Nothochrysa sinica	Nothochrysa_sinica_NC_060341_1	Insecta	Neuroptera	Chrysopidae	Nothochrysa	Arthropoda	F	H	16166	14694	-0.136	0.0124335	38.6	41.3	11.5	8.6	79.9	20.1	49.9	-0.033	-0.143	0.033	0.143	Nothochrysa_sinica_NC_060341_1	0.0910553	5	2.356	Nothochrysa_sinica_NC_060341	Nothochrysa_sinica_NC_060341	double
3	NC_018765.1	Xizicus fascipes	Xizicus_fascipes_NC_018765_1	Insecta	Orthoptera	Tettigoniidae	Xizicus	Arthropoda	F	H	16166	14727	-0.265	0.00377335	36.9	33.3	19	10.8	70.2	29.8	44.1	0.052	-0.276	-0.052	0.276	Xizicus_fascipes_NC_018765_1	0.089014	5	2.358	Xizicus_fascipes_NC_018765	Xizicus_fascipes_NC_018765	double
3	NC_036261.1	Tachyta nana	Tachyta_nana_NC_036261_1	Insecta	Coleoptera	Carabidae	Tachyta	Arthropoda	F	H	16165	14651	-0.173	0.0706465	40.5	40.4	11.3	7.8	80.9	19.1	48.2	0.002	-0.186	-0.002	0.186	Tachyta_nana_NC_036261_1	0.0936591	5	2.42	Tachyta_nana_NC_036261	Tachyta_nana_NC_036261	double
3	NC_060736.1	Scarites subterraneus	Scarites_subterraneus_NC_060736_1	Insecta	Coleoptera	Carabidae	Scarites	Arthropoda	F	H	16163	14714	-0.189	0.0889068	40.9	37.4	13	8.7	78.3	21.7	46.1	0.045	-0.199	-0.045	0.199	Scarites_subterraneus_NC_060736_1	0.0896492	5	2.375	Scarites_subterraneus_NC_060736	Scarites_subterraneus_NC_060736	double
3	NC_056144.1	Lycocerus asperipennis	Lycocerus_asperipennis_NC_056144_1	Insecta	Coleoptera	Cantharidae	Lycocerus	Arthropoda	F	H	16162	14637	-0.191	0.0168915	41.5	37.7	12.4	8.4	79.2	20.8	46.1	0.048	-0.189	-0.048	0.189	Lycocerus_asperipennis_NC_056144_1	0.0943571	5	2.942	Lycocerus_asperipennis_NC_056144	Lycocerus_asperipennis_NC_056144	double
3	NC_060658.1	Kaburagia rhusicola ovogallis	Kaburagia_rhusicola_ovogallis_NC_060658_1	Insecta	Hemiptera	Pemphigidae	Kaburagia	Arthropoda	F	H	16162	14391	-0.308	0.109516	44.8	38.5	11	5.8	83.3	16.8	44.3	0.076	-0.307	-0.076	0.307	Kaburagia_rhusicola_ovogallis_NC_060658_1	0.109578	5	3.943	Kaburagia_rhusicola_ovogallis_NC_060658	Kaburagia_rhusicola_ovogallis_NC_060658	double
3	NC_026209.1	Portunus pelagicus	Portunus_pelagicus_NC_026209_1	Malacostraca	Decapoda	Portunidae	Portunus	Arthropoda	F	H	16157	14795	-0.222	0.0842978	33.7	35	19.1	12.2	68.7	31.3	47.2	-0.019	-0.219	0.019	0.219	Portunus_pelagicus_NC_026209_1	0.0842978	5	2.768	Portunus_pelagicus_NC_026209	Portunus_pelagicus_NC_026209	double
3	NC_059721.1	Paralimna concors	Paralimna_concors_NC_059721_1	Insecta	Diptera	Ephydridae	Paralimna	Arthropoda	F	H	16155	14765	-0.174	0.00526153	39.2	39.4	12.6	8.8	78.6	21.4	48.2	-0.001	-0.182	0.001	0.182	Paralimna_concors_NC_059721_1	0.0860415	5	2.401	Paralimna_concors_NC_059721	Paralimna_concors_NC_059721	double
3	NC_016202.1	Protoplasa fitchii	Protoplasa_fitchii_NC_016202_1	Insecta	Diptera	Tanyderidae	Protoplasa	Arthropoda	F	H	16154	14785	-0.158	0.00705708	38.8	38.3	13.3	9.5	77.1	22.8	47.8	0.007	-0.166	-0.007	0.166	Protoplasa_fitchii_NC_016202_1	0.0825802	5	2.285	Protoplasa_fitchii_NC_016202	Protoplasa_fitchii_NC_016202	double
3	NC_060806.1	Pochazia guttifera	Pochazia_guttifera_NC_060806_1	Insecta	Hemiptera	Ricaniidae	Pochazia	Arthropoda	F	H	16153	14252	-0.248	0.0085433	47.9	27.2	15.6	9.4	75.1	25	36.6	0.276	-0.248	-0.276	0.248	Pochazia_guttifera_NC_060806_1	0.117687	5	3.556	Pochazia_guttifera_NC_060806	Pochazia_guttifera_NC_060806	double
3	NC_042677.1	Micromus angulatus	Micromus_angulatus_NC_042677_1	Insecta	Neuroptera	Hemerobiidae	Micromus	Arthropoda	F	H	16153	14675	-0.14	0.0104005	39.8	40.2	11.3	8.6	80	19.9	48.8	-0.005	-0.136	0.005	0.136	Micromus_angulatus_NC_042677_1	0.0915	5	2.42	Micromus_angulatus_NC_042677	Micromus_angulatus_NC_042677	double
3	NC_048466.1	Shoveliteratura triangula	Shoveliteratura_triangula_NC_048466_1	Insecta	Orthoptera	Tettigoniidae	Shoveliteratura	Arthropoda	F	H	16152	14714	-0.262	0.00253839	36.8	33.6	18.7	10.8	70.4	29.5	44.4	0.046	-0.268	-0.046	0.268	Shoveliteratura_triangula_NC_048466_1	0.0890292	5	2.362	Shoveliteratura_triangula_NC_048466	Shoveliteratura_triangula_NC_048466	double
3	NC_052894.1	Ochthebius glaber	Ochthebius_glaber_NC_052894_1	Insecta	Coleoptera	Hydraenidae	Ochthebius	Arthropoda	F	I	16151	14548	-0.174	0.0694075	40.6	37.6	12.9	8.9	78.2	21.8	46.5	0.039	-0.182	-0.039	0.182	Ochthebius_glaber_NC_052894_1	0.0992508	5	2.452	Ochthebius_glaber_NC_052894	Ochthebius_glaber_NC_052894	double
3	NC_039700.1	Inflata indica	Inflata_indica_NC_039700_1	Insecta	Coleoptera	Lampyridae	Inflata	Arthropoda	F	H	16150	14521	-0.176	0.00365325	44.2	35.8	11.8	8.2	80	20	44	0.104	-0.178	-0.104	0.178	Inflata_indica_NC_039700_1	0.100867	5	2.757	Inflata_indica_NC_039700	Inflata_indica_NC_039700	double
3	NC_035312.1	Meitanaphis flavogallis	Meitanaphis_flavogallis_NC_035312_1	Insecta	Hemiptera	Pemphigidae	Meitanaphis	Arthropoda	F	H	16150	14412	-0.31	0.107616	44.9	38.4	10.9	5.8	83.3	16.7	44.2	0.078	-0.307	-0.078	0.307	Meitanaphis_flavogallis_NC_035312_1	0.107616	5	3.948	Meitanaphis_flavogallis_NC_035312	Meitanaphis_flavogallis_NC_035312	double
3	NC_047449.1	Blaps rhynchoptera	Blaps_rhynchoptera_NC_047449_1	Insecta	Coleoptera	Tenebrionidae	Blaps	Arthropoda	F	H	16149	14558	-0.23	0.0207443	41.6	31.8	16.3	10.3	73.4	26.6	42.1	0.134	-0.226	-0.134	0.226	Blaps_rhynchoptera_NC_047449_1	0.09852	5	2.6	Blaps_rhynchoptera_NC_047449	Blaps_rhynchoptera_NC_047449	double
3	NC_052899.1	Ochthebius magnannulatus	Ochthebius_magnannulatus_NC_052899_1	Insecta	Coleoptera	Hydraenidae	Ochthebius	Arthropoda	F	I	16148	14562	-0.148	0.0598836	41.2	38.6	11.7	8.5	79.8	20.2	47.1	0.033	-0.158	-0.033	0.158	Ochthebius_magnannulatus_NC_052899_1	0.0982165	5	2.458	Ochthebius_magnannulatus_NC_052899	Ochthebius_magnannulatus_NC_052899	double
3	NC_052900.1	Ochthebius mediterraneus	Ochthebius_mediterraneus_NC_052900_1	Insecta	Coleoptera	Hydraenidae	Ochthebius	Arthropoda	F	I	16148	14563	-0.147	0.0161011	41.2	38.6	11.7	8.5	79.8	20.2	47.1	0.033	-0.158	-0.033	0.158	Ochthebius_mediterraneus_NC_052900_1	0.0981546	5	2.458	Ochthebius_mediterraneus_NC_052900	Ochthebius_mediterraneus_NC_052900	double
7	NC_056769.1	Lepeophtheirus salmonis	Lepeophtheirus_salmonis_NC_056769_1	Hexanauplia	Siphonostomatoida	Caligidae	Lepeophtheirus	Arthropoda	EctoP	L	16148	13597	0.19	0.0870077	32.8	33.1	13.5	20.6	65.9	34.1	53.7	-0.004	0.208	0.004	-0.208	Lepeophtheirus_salmonis_NC_056769_1	0.158038	5	4.581	Lepeophtheirus_salmonis_NC_056769	Lepeophtheirus_salmonis_NC_056769	double
3	NC_037754.1	Suwallia teleckojensis	Suwallia_teleckojensis_NC_037754_1	Insecta	Plecoptera	Chloroperlidae	Suwallia	Arthropoda	F	H	16146	14821	-0.302	0.00470705	36.5	30.2	21.7	11.6	66.7	33.3	41.8	0.095	-0.303	-0.095	0.303	Suwallia_teleckojensis_NC_037754_1	0.0820637	5	2.388	Suwallia_teleckojensis_NC_037754	Suwallia_teleckojensis_NC_037754	double
3	NC_021397.1	Tarragoilus diuturnus	Tarragoilus_diuturnus_NC_021397_1	Insecta	Orthoptera	Prophalangopsidae	Tarragoilus	Arthropoda	F	H	16144	14775	-0.281	0.00421209	36.3	30.9	20.9	11.9	67.2	32.8	42.8	0.079	-0.275	-0.079	0.275	Tarragoilus_diuturnus_NC_021397_1	0.0847993	5	2.36	Tarragoilus_diuturnus_NC_021397	Tarragoilus_diuturnus_NC_021397	double
3	NC_019607.1	Upogebia major	Upogebia_major_NC_019607_1	Malacostraca	Decapoda	Upogebiidae	Upogebia	Arthropoda	F	H	16143	15132	-0.25	0.0624419	36.5	34.2	18.3	11	70.7	29.3	45.2	0.032	-0.249	-0.032	0.249	Upogebia_major_NC_019607_1	0.0626278	5	2.528	Upogebia_major_NC_019607	Upogebia_major_NC_019607	double
6	NC_041211.1	Neoeriocheir leptognathus	Neoeriocheir_leptognathus_NC_041211_1	Malacostraca	Decapoda	Varunidae	Neoeriocheir	Arthropoda	F	H	16143	14826	-0.21	0.0319024	35.6	39	15.3	10.1	74.6	25.4	49.1	-0.046	-0.206	0.046	0.206	Neoeriocheir_leptognathus_NC_041211_1	0.08084	5	2.732	Neoeriocheir_leptognathus_NC_041211	Neoeriocheir_leptognathus_NC_041211	double
6	NC_016173.1	Paracladura trichoptera	Paracladura_trichoptera_NC_016173_1	Insecta	Diptera	Trichoceridae	Paracladura	Arthropoda	F	H	16143	14836	-0.188	0.0249644	40.7	37.6	12.9	8.8	78.3	21.7	46.4	0.039	-0.19	-0.039	0.19	Paracladura_trichoptera_NC_016173_1	0.0809639	5	2.371	Paracladura_trichoptera_NC_016173	Paracladura_trichoptera_NC_016173	double
5	NC_048465.1	Chorthippus fallax	Chorthippus_fallax_NC_048465_1	Insecta	Orthoptera	Acrididae	Chorthippus	Arthropoda	F	H	16143	14790	-0.142	0.0390882	42.9	32.3	14.3	10.6	75.2	24.9	42.9	0.141	-0.148	-0.141	0.148	Chorthippus_fallax_NC_048465_1	0.0838134	5	2.599	Chorthippus_fallax_NC_048465	Chorthippus_fallax_NC_048465	double
3	NC_034799.1	Oecanthus sinensis	Oecanthus_sinensis_NC_034799_1	Insecta	Orthoptera	Gryllidae	Oecanthus	Arthropoda	F	H	16142	14566	-0.238	0.00792962	39.5	37.9	14.1	8.5	77.4	22.6	46.4	0.021	-0.249	-0.021	0.249	Oecanthus_sinensis_NC_034799_1	0.0976335	5	2.679	Oecanthus_sinensis_NC_034799	Oecanthus_sinensis_NC_034799	double
3	NC_014283.1	Liriomyza trifolii	Liriomyza_trifolii_NC_014283_1	Insecta	Diptera	Agromyzidae	Liriomyza	Arthropoda	F	H	16141	14950	-0.185	0.0568118	40.9	37	12.9	9	77.9	21.9	46	0.05	-0.18	-0.05	0.18	Liriomyza_trifolii_NC_014283_1	0.0737872	5	2.539	Liriomyza_trifolii_NC_014283	Liriomyza_trifolii_NC_014283	double
3	NC_028226.1	Delia antiqua	Delia_antiqua_NC_028226_1	Insecta	Diptera	Anthomyiidae	Delia	Arthropoda	F	H	16141	14777	-0.169	0.00607149	39.6	38.9	12.6	8.9	78.5	21.5	47.8	0.009	-0.173	-0.009	0.173	Delia_antiqua_NC_028226_1	0.0845053	5	2.425	Delia_antiqua_NC_028226	Delia_antiqua_NC_028226	double
3	NC_008754.1	Simosyrphus grandicornis	Simosyrphus_grandicornis_NC_008754_1	Insecta	Diptera	Syrphidae	Simosyrphus	Arthropoda	F	H	16141	14764	-0.133	0.0154885	40.3	40.6	10.9	8.3	80.9	19.2	48.9	-0.004	-0.133	0.004	0.133	Simosyrphus_grandicornis_NC_008754_1	0.0853107	5	2.469	Simosyrphus_grandicornis_NC_008754	Simosyrphus_grandicornis_NC_008754	double
3	NC_016169.1	Trichocera bimacula	Trichocera_bimacula_NC_016169_1	Insecta	Diptera	Trichoceridae	Trichocera	Arthropoda	F	H	16140	14787	-0.172	0.0188352	38.1	37.1	14.6	10.2	75.2	24.8	47.3	0.012	-0.176	-0.012	0.176	Trichocera_bimacula_NC_016169_1	0.0817844	5	2.275	Trichocera_bimacula_NC_016169	Trichocera_bimacula_NC_016169	double
3	NC_056092.1	Iotaphora admirabilis	Iotaphora_admirabilis_NC_056092_1	Insecta	Lepidoptera	Geometridae	Iotaphora	Arthropoda	F	H	16140	14933	-0.168	0.0125155	42.5	39.8	10.3	7.4	82.3	17.7	47.2	0.033	-0.166	-0.033	0.166	Iotaphora_admirabilis_NC_056092_1	0.0747831	5	2.652	Iotaphora_admirabilis_NC_056092	Iotaphora_admirabilis_NC_056092	double
3	NC_036265.1	Incoltorrida madagassica	Incoltorrida_madagassica_NC_036265_1	Insecta	Coleoptera	Torridincolidae	Incoltorrida	Arthropoda	F	H	16139	14580	-0.184	0.0602268	40.1	39.9	11.8	8.2	80	20	48.1	0.003	-0.184	-0.003	0.184	Incoltorrida_madagassica_NC_036265_1	0.0965983	5	2.402	Incoltorrida_madagassica_NC_036265	Incoltorrida_madagassica_NC_036265	double
3	NC_039666.1	Ornebius bimaculatus	Ornebius_bimaculatus_NC_039666_1	Insecta	Orthoptera	Mogoplistidae	Ornebius	Arthropoda	F	H	16136	14673	-0.316	0.0198314	39.1	37.3	15.5	8.1	76.4	23.6	45.4	0.024	-0.315	-0.024	0.315	Ornebius_bimaculatus_NC_039666_1	0.0906668	5	2.575	Ornebius_bimaculatus_NC_039666	Ornebius_bimaculatus_NC_039666	double
3	NC_023476.1	Chaceon granulatus	Chaceon_granulatus_NC_023476_1	Malacostraca	Decapoda	Geryonidae	Chaceon	Arthropoda	F	H	16135	14709	-0.2	0.0883793	33.2	35.9	18.6	12.3	69.1	30.9	48.2	-0.04	-0.207	0.04	0.207	Chaceon_granulatus_NC_023476_1	0.0883793	5	2.718	Chaceon_granulatus_NC_023476	Chaceon_granulatus_NC_023476	double
3	NC_028411.1	Calliphora vomitoria	Calliphora_vomitoria_NC_028411_1	Insecta	Diptera	Calliphoridae	Calliphora	Arthropoda	F	H	16134	14724	-0.16	0.00564026	39.4	38.1	13.1	9.4	77.5	22.5	47.5	0.017	-0.165	-0.017	0.165	Calliphora_vomitoria_NC_028411_1	0.0873931	5	2.435	Calliphora_vomitoria_NC_028411	Calliphora_vomitoria_NC_028411	double
3	NC_025958.1	Nephrops norvegicus	Nephrops_norvegicus_NC_025958_1	Malacostraca	Decapoda	Nephropidae	Nephrops	Arthropoda	F	H	16132	14689	-0.141	0.0894495	34.4	36.8	16.4	12.4	71.2	28.8	49.2	-0.033	-0.141	0.033	0.141	Nephrops_norvegicus_NC_025958_1	0.0894495	5	2.487	Nephrops_norvegicus_NC_025958	Nephrops_norvegicus_NC_025958	double
3	NC_035677.1	Acanthoscelides obtectus	Acanthoscelides_obtectus_NC_035677_1	Insecta	Coleoptera	Chrysomelidae	Acanthoscelides	Arthropoda	F	H	16130	14518	-0.207	0.015995	39	37.4	14.3	9.3	76.4	23.6	46.7	0.022	-0.211	-0.022	0.211	Acanthoscelides_obtectus_NC_035677_1	0.099938	5	2.625	Acanthoscelides_obtectus_NC_035677	Acanthoscelides_obtectus_NC_035677	double
3	NC_039711.1	Monolepta quadriguttata	Monolepta_quadriguttata_NC_039711_1	Insecta	Coleoptera	Chrysomelidae	Monolepta	Arthropoda	F	H	16130	14526	-0.158	0.0016739	41.1	39.2	11.7	8	80.3	19.7	47.2	0.024	-0.188	-0.024	0.188	Monolepta_quadriguttata_NC_039711_1	0.099442	5	2.687	Monolepta_quadriguttata_NC_039711	Monolepta_quadriguttata_NC_039711	double
3	NC_034809.1	Styloperla spinicercia	Styloperla_spinicercia_NC_034809_1	Insecta	Plecoptera	Styloperlidae	Styloperla	Arthropoda	F	H	16129	14811	-0.237	0.00365801	37.4	33.3	18.1	11.2	70.7	29.3	44.5	0.058	-0.235	-0.058	0.235	Styloperla_spinicercia_NC_034809_1	0.0817162	5	2.391	Styloperla_spinicercia_NC_034809	Styloperla_spinicercia_NC_034809	double
3	NC_054325.1	Aedes alternans	Aedes_alternans_NC_054325_1	Insecta	Diptera	Culicidae	Aedes	Arthropoda	MP	H	16128	14716	-0.187	0.0115947	40.7	38.3	12.5	8.4	79	20.9	46.7	0.03	-0.196	-0.03	0.196	Aedes_alternans_NC_054325_1	0.0875496	5	2.549	Aedes_alternans_NC_054325	Aedes_alternans_NC_054325	double
3	NC_059897.1	Nothybus sumatranus	Nothybus_sumatranus_NC_059897_1	Insecta	Diptera	Nothybidae	Nothybus	Arthropoda	F	H	16128	14692	-0.207	0.031374	39.2	38.9	13.2	8.7	78.1	21.9	47.6	0.005	-0.208	-0.005	0.208	Nothybus_sumatranus_NC_059897_1	0.0890377	5	2.508	Nothybus_sumatranus_NC_059897	Nothybus_sumatranus_NC_059897	double
3	NC_036353.1	Pteroptyx maipo	Pteroptyx_maipo_NC_036353_1	Insecta	Coleoptera	Lampyridae	Pteroptyx	Arthropoda	F	H	16127	14515	-0.165	0.00384448	44.2	36	11.6	8.2	80.2	19.8	44.2	0.103	-0.17	-0.103	0.17	Pteroptyx_maipo_NC_036353_1	0.0999566	5	2.766	Pteroptyx_maipo_NC_036353	Pteroptyx_maipo_NC_036353	double
3	NC_052895.1	Ochthebius griotes	Ochthebius_griotes_NC_052895_1	Insecta	Coleoptera	Hydraenidae	Ochthebius	Arthropoda	F	I	16126	14566	-0.146	0.0164331	41.3	38.7	11.5	8.5	80	20	47.2	0.032	-0.152	-0.032	0.152	Ochthebius_griotes_NC_052895_1	0.0967382	5	2.471	Ochthebius_griotes_NC_052895	Ochthebius_griotes_NC_052895	double
3	NC_022680.1	Hylobitelus xiaoi	Hylobitelus_xiaoi_NC_022680_1	Insecta	Coleoptera	Curculionidae	Hylobitelus	Arthropoda	F	H	16123	14636	-0.242	0.0169323	39.5	36.2	15.2	9.1	75.7	24.3	45.3	0.044	-0.252	-0.044	0.252	Hylobitelus_xiaoi_NC_022680_1	0.0922285	5	2.954	Hylobitelus_xiaoi_NC_022680	Hylobitelus_xiaoi_NC_022680	double
3	NC_054236.1	Dineutus mellyi	Dineutus_mellyi_NC_054236_1	Insecta	Coleoptera	Gyrinidae	Dineutus	Arthropoda	F	H	16123	14762	-0.155	0.00446567	40.5	38.9	11.8	8.8	79.4	20.6	47.7	0.021	-0.149	-0.021	0.149	Dineutus_mellyi_NC_054236_1	0.0844136	5	2.364	Dineutus_mellyi_NC_054236	Dineutus_mellyi_NC_054236	double
3	NC_030762.1	Velarifictorus hemelytrus	Velarifictorus_hemelytrus_NC_030762_1	Insecta	Orthoptera	Gryllidae	Velarifictorus	Arthropoda	F	H	16123	14683	-0.342	0.00272902	39.7	32.9	18.4	8.9	72.6	27.3	41.8	0.093	-0.348	-0.093	0.348	Velarifictorus_hemelytrus_NC_030762_1	0.0893134	5	2.519	Velarifictorus_hemelytrus_NC_030762	Velarifictorus_hemelytrus_NC_030762	double
3	NC_026115.1	Nasutitermes corniger	Nasutitermes_corniger_NC_026115_1	Insecta	Blattodea	Termitidae	Nasutitermes	Arthropoda	F	H	16122	14842	-0.27	0.0793946	41.4	23.6	22.4	12.6	65	35	36.2	0.275	-0.278	-0.275	0.278	Nasutitermes_corniger_NC_026115_1	0.0793946	5	2.758	Nasutitermes_corniger_NC_026115	Nasutitermes_corniger_NC_026115	double
3	NC_048984.1	Hierodula membranacea	Hierodula_membranacea_NC_048984_1	Insecta	Mantodea	Mantidae	Hierodula	Arthropoda	F	H	16122	14682	-0.229	0.0468304	39.2	35.6	15.5	9.6	74.8	25.1	45.2	0.048	-0.233	-0.048	0.233	Hierodula_membranacea_NC_048984_1	0.0893189	5	2.654	Hierodula_membranacea_NC_048984	Hierodula_membranacea_NC_048984	double
3	NC_033981.1	Decma fissa	Decma_fissa_NC_033981_1	Insecta	Orthoptera	Tettigoniidae	Decma	Arthropoda	F	H	16122	14727	-0.209	0.00353554	38.7	36.2	15.2	9.9	74.9	25.1	46.1	0.033	-0.212	-0.033	0.212	Decma_fissa_NC_033981_1	0.0865277	5	2.358	Decma_fissa_NC_033981	Decma_fissa_NC_033981	double
3	NC_060807.1	Pochazia confusa	Pochazia_confusa_NC_060807_1	Insecta	Hemiptera	Ricaniidae	Pochazia	Arthropoda	F	H	16121	14231	-0.241	0.0104832	48.4	28.3	14.3	9	76.7	23.3	37.3	0.262	-0.224	-0.262	0.224	Pochazia_confusa_NC_060807_1	0.117238	5	3.553	Pochazia_confusa_NC_060807	Pochazia_confusa_NC_060807	double
3	NC_009964.1	Pyrophorus divergens	Pyrophorus_divergens_NC_009964_1	Insecta	Coleoptera	Elateridae	Pyrophorus	Arthropoda	F	H	16120	14609	-0.296	0.00254342	40.5	29	19.7	10.8	69.5	30.5	39.8	0.165	-0.292	-0.165	0.292	Pyrophorus_divergens_NC_009964_1	0.0937345	5	2.604	Pyrophorus_divergens_NC_009964	Pyrophorus_divergens_NC_009964	double
3	NC_037910.1	Musca sorbens	Musca_sorbens_NC_037910_1	Insecta	Diptera	Muscidae	Musca	Arthropoda	F	H	16120	14731	-0.159	0.00527295	39.1	38.3	13.1	9.5	77.4	22.6	47.8	0.01	-0.159	-0.01	0.159	Musca_sorbens_NC_037910_1	0.0861663	5	2.428	Musca_sorbens_NC_037910	Musca_sorbens_NC_037910	double
3	NC_033983.1	Hexacentrus japonicus	Hexacentrus_japonicus_NC_033983_1	Insecta	Orthoptera	Tettigoniidae	Hexacentrus	Arthropoda	F	H	16120	14727	-0.27	0.00533499	36.3	33	19.6	11.1	69.3	30.7	44.1	0.048	-0.278	-0.048	0.278	Hexacentrus_japonicus_NC_033983_1	0.0864144	5	2.384	Hexacentrus_japonicus_NC_033983	Hexacentrus_japonicus_NC_033983	double
3	NC_036410.1	Mahasena oolona	Mahasena_oolona_NC_036410_1	Insecta	Lepidoptera	Psychidae	Mahasena	Arthropoda	F	H	16119	14914	-0.214	0.0735778	42.5	40.4	10.5	6.7	82.9	17.2	47.1	0.025	-0.22	-0.025	0.22	Mahasena_oolona_NC_036410_1	0.0747565	5	2.638	Mahasena_oolona_NC_036410	Mahasena_oolona_NC_036410	double
3	NC_035552.1	Pteranabropsis carnarius	Pteranabropsis_carnarius_NC_035552_1	Insecta	Orthoptera	Anostostomatidae	Pteranabropsis	Arthropoda	F	H	16119	14795	-0.229	0.0110429	39.2	35.5	15.6	9.7	74.7	25.3	45.2	0.05	-0.235	-0.05	0.235	Pteranabropsis_carnarius_NC_035552_1	0.0821391	5	2.289	Pteranabropsis_carnarius_NC_035552	Pteranabropsis_carnarius_NC_035552	double
3	NC_052892.1	Ochthebius capicola	Ochthebius_capicola_NC_052892_1	Insecta	Coleoptera	Hydraenidae	Ochthebius	Arthropoda	F	I	16114	14571	-0.147	0.0631749	40.3	39.2	11.8	8.7	79.5	20.5	47.9	0.014	-0.149	-0.014	0.149	Ochthebius_capicola_NC_052892_1	0.0957552	5	2.467	Ochthebius_capicola_NC_052892	Ochthebius_capicola_NC_052892	double
3	NC_048456.1	Rachelia extrusus	Rachelia_extrusus_NC_048456_1	Insecta	Lepidoptera	Hesperiidae	Rachelia	Arthropoda	F	H	16114	14804	-0.245	0.0384138	39.7	41	11.8	7.1	80.7	18.9	48.1	-0.016	-0.247	0.016	0.247	Rachelia_extrusus_NC_048456_1	0.0812958	5	2.683	Rachelia_extrusus_NC_048456	Rachelia_extrusus_NC_048456	double
3	NC_026721.1	Lyreidus brevifrons	Lyreidus_brevifrons_NC_026721_1	Malacostraca	Decapoda	Raninidae	Lyreidus	Arthropoda	F	H	16112	14795	-0.235	0.0817403	34.2	36.4	18.1	11.3	70.6	29.4	47.7	-0.031	-0.231	0.031	0.231	Lyreidus_brevifrons_NC_026721_1	0.0817403	5	2.624	Lyreidus_brevifrons_NC_026721	Lyreidus_brevifrons_NC_026721	double
3	NC_019639.1	Calliphora vicina	Calliphora_vicina_NC_019639_1	Insecta	Diptera	Calliphoridae	Calliphora	Arthropoda	F	H	16112	14737	-0.164	0.00564796	39.6	38	13.2	9.2	77.6	22.4	47.2	0.02	-0.175	-0.02	0.175	Calliphora_vicina_NC_019639_1	0.0853401	5	2.434	Calliphora_vicina_NC_019639	Calliphora_vicina_NC_019639	double
3	NC_041412.1	Dasyhippus barbipes	Dasyhippus_barbipes_NC_041412_1	Insecta	Orthoptera	Acrididae	Dasyhippus	Arthropoda	F	H	16111	14699	-0.153	0.00738626	39.3	38.5	12.8	9.4	77.8	22.2	47.9	0.011	-0.155	-0.011	0.155	Dasyhippus_barbipes_NC_041412_1	0.087642	5	2.425	Dasyhippus_barbipes_NC_041412	Dasyhippus_barbipes_NC_041412	double
3	NC_033991.1	Ruspolia lineosa	Ruspolia_lineosa_NC_033991_1	Insecta	Orthoptera	Tettigoniidae	Ruspolia	Arthropoda	F	H	16110	14782	-0.236	0.00577281	36.5	34.7	17.7	11.1	71.2	28.8	45.8	0.026	-0.23	-0.026	0.23	Ruspolia_lineosa_NC_033991_1	0.0824333	5	2.399	Ruspolia_lineosa_NC_033991	Ruspolia_lineosa_NC_033991	double
3	NC_036108.1	Gastrolina thoracica	Gastrolina_thoracica_NC_036108_1	Insecta	Coleoptera	Chrysomelidae	Gastrolina	Arthropoda	F	H	16109	14528	-0.217	0.00142777	41.4	36	13.8	8.8	77.4	22.6	44.8	0.07	-0.221	-0.07	0.221	Gastrolina_thoracica_NC_036108_1	0.0981439	5	2.757	Gastrolina_thoracica_NC_036108	Gastrolina_thoracica_NC_036108	double
3	NC_054324.1	Toxorhynchites speciosus	Toxorhynchites_speciosus_NC_054324_1	Insecta	Diptera	Culicidae	Toxorhynchites	Arthropoda	MP	H	16109	14782	-0.19	0.00521448	40.7	40.4	11.5	7.5	81.1	19	47.9	0.004	-0.212	-0.004	0.212	Toxorhynchites_speciosus_NC_054324_1	0.0823763	5	2.592	Toxorhynchites_speciosus_NC_054324	Toxorhynchites_speciosus_NC_054324	double
3	NC_059869.1	Sarcotachina subcylindrica	Sarcotachina_subcylindrica_NC_059869_1	Insecta	Diptera	Sarcophagidae	Sarcotachina	Arthropoda	Parasitoid	H	16109	14728	-0.184	0.00744925	39.5	37.5	13.6	9.3	77	22.9	46.8	0.026	-0.187	-0.026	0.187	Sarcotachina_subcylindrica_NC_059869_1	0.0857285	5	2.431	Sarcotachina_subcylindrica_NC_059869	Sarcotachina_subcylindrica_NC_059869	double
3	NC_024855.1	Musca domestica	Musca_domestica_NC_024855_1	Insecta	Diptera	Muscidae	Musca	Arthropoda	F	H	16108	14727	-0.157	0.00564937	39.4	38.5	12.8	9.3	77.9	22.1	47.8	0.012	-0.158	-0.012	0.158	Musca_domestica_NC_024855_1	0.0857338	5	2.427	Musca_domestica_NC_024855	Musca_domestica_NC_024855	double
3	NC_036279.1	Horatocera niponica	Horatocera_niponica_NC_036279_1	Insecta	Coleoptera	Callirhipidae	Horatocera	Arthropoda	F	H	16107	14526	-0.28	0.0671758	41.8	33.7	15.7	8.8	75.5	24.5	42.5	0.108	-0.281	-0.108	0.281	Horatocera_niponica_NC_036279_1	0.0981561	5	2.469	Horatocera_niponica_NC_036279	Horatocera_niponica_NC_036279	double
3	NC_043898.1	Glyptelasma annandalei	Glyptelasma_annandalei_NC_043898_1	Hexanauplia	Pedunculata	Poecilasmatidae	Glyptelasma	Arthropoda	F	L	16107	13006	-0.185	0.0967902	38	34.3	16.1	11.5	72.3	27.6	45.8	0.052	-0.166	-0.052	0.166	Glyptelasma_annandalei_NC_043898_1	0.101384	5	2.59	Glyptelasma_annandalei_NC_043898	Glyptelasma_annandalei_NC_043898	double
2	NC_035951.1	Xenograpsus ngatama	Xenograpsus_ngatama_NC_035951_1	Malacostraca	Decapoda	Xenograpsidae	Xenograpsus	Arthropoda	F	I	16106	14453	-0.282	0.102446	36.1	36.8	17.5	9.6	72.9	27.1	46.4	-0.01	-0.293	0.01	0.293	Xenograpsus_ngatama_NC_035951_1	0.102633	5	2.784	Xenograpsus_ngatama_NC_035951	Xenograpsus_ngatama_NC_035951	double
3	NC_039771.1	Mantispa japonica	Mantispa_japonica_NC_039771_1	Insecta	Neuroptera	Mantispidae	Mantispa	Arthropoda	F	H	16106	14673	-0.169	0.00943748	40.1	39.2	12.2	8.5	79.3	20.7	47.7	0.011	-0.178	-0.011	0.178	Mantispa_japonica_NC_039771_1	0.0889731	5	2.347	Mantispa_japonica_NC_039771	Mantispa_japonica_NC_039771	double
3	NC_014854.1	Panulirus ornatus	Panulirus_ornatus_NC_014854_1	Malacostraca	Decapoda	Palinuridae	Panulirus	Arthropoda	F	H	16105	14821	-0.204	0.0797268	34.4	32.3	20.1	13.2	66.7	33.3	45.5	0.032	-0.21	-0.032	0.21	Panulirus_ornatus_NC_014854_1	0.0797268	5	2.74	Panulirus_ornatus_NC_014854	Panulirus_ornatus_NC_014854	double
3	NC_048454.1	Malaza empyreus	Malaza_empyreus_NC_048454_1	Insecta	Lepidoptera	Hesperiidae	Malaza	Arthropoda	F	H	16103	14561	-0.21	0.066323	40.6	40.4	11.7	7.3	81	19	47.7	0.004	-0.229	-0.004	0.229	Malaza_empyreus_NC_048454_1	0.0957586	5	2.666	Malaza_empyreus_NC_048454	Malaza_empyreus_NC_048454	double
3	NC_034003.1	Vespa orientalis	Vespa_orientalis_NC_034003_1	Insecta	Hymenoptera	Vespidae	Vespa	Arthropoda	F	H	16101	14133	0.369	0.118502	40.3	40.6	5.9	13.2	80.9	19.1	53.8	-0.004	0.384	0.004	-0.384	Vespa_orientalis_NC_034003_1	0.122228	5	4.255	Vespa_orientalis_NC_034003	Vespa_orientalis_NC_034003	double
3	NC_028518.1	Drosophila formosana	Drosophila_formosana_NC_028518_1	Insecta	Diptera	Drosophilidae	Drosophila	Arthropoda	F	H	16100	14718	-0.152	0.0184472	38.9	37.9	12.7	9.2	76.8	21.9	47.1	0.012	-0.156	-0.012	0.156	Drosophila_formosana_NC_028518_1	0.0858385	5	2.393	Drosophila_formosana_NC_028518	Drosophila_formosana_NC_028518	double
3	NC_036280.1	Xylosandrus germanus	Xylosandrus_germanus_NC_036280_1	Insecta	Coleoptera	Curculionidae	Xylosandrus	Arthropoda	F	I	16099	14454	-0.275	0.0475185	38.4	32.1	18.7	10.7	70.5	29.4	42.8	0.09	-0.272	-0.09	0.272	Xylosandrus_germanus_NC_036280_1	0.10218	5	3.182	Xylosandrus_germanus_NC_036280	Xylosandrus_germanus_NC_036280	double
6	NC_026226.1	Cherax bicarinatus	Cherax_bicarinatus_NC_026226_1	Malacostraca	Decapoda	Parastacidae	Cherax	Arthropoda	F	H	16099	14750	-0.305	0.0836698	32.7	32.3	22.8	12.1	65	34.9	44.4	0.007	-0.306	-0.007	0.306	Cherax_bicarinatus_NC_026226_1	0.083794	5	2.853	Cherax_bicarinatus_NC_026226	Cherax_bicarinatus_NC_026226	double
3	NC_035553.1	Pteranabropsis crenatis	Pteranabropsis_crenatis_NC_035553_1	Insecta	Orthoptera	Anostostomatidae	Pteranabropsis	Arthropoda	F	H	16099	14793	-0.216	0.0109945	39.2	35.8	15.4	9.6	75	25	45.4	0.046	-0.229	-0.046	0.229	Pteranabropsis_crenatis_NC_035553_1	0.0811231	5	2.294	Pteranabropsis_crenatis_NC_035553	Pteranabropsis_crenatis_NC_035553	double
3	NC_014055.1	Papilio maraho	Papilio_maraho_NC_014055_1	Insecta	Lepidoptera	Papilionidae	Papilio	Arthropoda	F	H	16094	14713	-0.256	0.00689698	40.5	40	12.3	7.2	80.5	19.5	47.2	0.006	-0.262	-0.006	0.262	Papilio_maraho_NC_014055_1	0.0858084	5	2.716	Papilio_maraho_NC_014055	Papilio_maraho_NC_014055	double
3	NC_031823.1	Megaloprepus caerulatus	Megaloprepus_caerulatus_NC_031823_1	Insecta	Odonata	Pseudostigmatidae	Megaloprepus	Arthropoda	F	H	16094	14602	-0.179	0.00720766	43.1	32.8	14.2	9.8	75.9	24	42.6	0.136	-0.184	-0.136	0.184	Megaloprepus_caerulatus_NC_031823_1	0.0927054	5	2.747	Megaloprepus_caerulatus_NC_031823	Megaloprepus_caerulatus_NC_031823	double
3	NC_030361.1	Aneurus sublobatus	Aneurus_sublobatus_NC_030361_1	Insecta	Hemiptera	Aradidae	Aneurus	Arthropoda	F	I	16091	14409	-0.243	0.101547	40.6	27.1	19.9	12.4	67.7	32.3	39.5	0.199	-0.234	-0.199	0.234	Aneurus_sublobatus_NC_030361_1	0.10453	5	3.15	Aneurus_sublobatus_NC_030361	Aneurus_sublobatus_NC_030361	double
3	NC_060364.1	Faughnia haani	Faughnia_haani_NC_060364_1	Malacostraca	Stomatopoda	Parasquillidae	Faughnia	Arthropoda	F	H	16089	14807	-0.181	0.0796818	35.3	31.9	19.5	13.3	67.2	32.8	45.2	0.051	-0.19	-0.051	0.19	Faughnia_haani_NC_060364_1	0.0796818	5	2.484	Faughnia_haani_NC_060364	Faughnia_haani_NC_060364	double
3	NC_037043.1	Sergia lucens	Sergia_lucens_NC_037043_1	Malacostraca	Decapoda	Sergestidae	Sergia	Arthropoda	F	H	16087	14876	-0.191	0.074843	34.9	35	17.9	12.2	69.9	30.1	47.2	-0.002	-0.19	0.002	0.19	Sergia_lucens_NC_037043_1	0.0752782	5	2.41	Sergia_lucens_NC_037043	Sergia_lucens_NC_037043	double
3	NC_032075.1	Euborellia arcanum	Euborellia_arcanum_NC_032075_1	Insecta	Dermaptera	Anisolabididae	Euborellia	Arthropoda	F	H	16087	14330	0.305	0.0665755	29.2	39.1	10.8	21	68.3	31.8	60.1	-0.145	0.321	0.145	-0.321	Euborellia_arcanum_NC_032075_1	0.109219	5	2.628	Euborellia_arcanum_NC_032075	Euborellia_arcanum_NC_032075	double
3	NC_031821.1	Anax imperator	Anax_imperator_NC_031821_1	Insecta	Odonata	Aeshnidae	Anax	Arthropoda	F	H	16087	14704	-0.121	0.0189594	40.6	35.4	13.5	10.5	76	24	45.9	0.068	-0.122	-0.068	0.122	Anax_imperator_NC_031821_1	0.08597	5	2.454	Anax_imperator_NC_031821	Anax_imperator_NC_031821	double
3	NC_041075.1	Dolichoderus sibiricus	Dolichoderus_sibiricus_NC_041075_1	Insecta	Hymenoptera	Formicidae	Dolichoderus	Arthropoda	F	H	16086	14383	-0.299	0.0672013	41.8	40	11.9	6.3	81.8	18.2	46.3	0.021	-0.304	-0.021	0.304	Dolichoderus_sibiricus_NC_041075_1	0.105868	5	4.099	Dolichoderus_sibiricus_NC_041075	Dolichoderus_sibiricus_NC_041075	double
3	NC_052896.1	Ochthebius hasegawai	Ochthebius_hasegawai_NC_052896_1	Insecta	Coleoptera	Hydraenidae	Ochthebius	Arthropoda	F	I	16085	14550	-0.133	0.0609263	41	38.9	11.5	8.6	79.9	20.1	47.5	0.027	-0.143	-0.027	0.143	Ochthebius_hasegawai_NC_052896_1	0.0954305	5	2.486	Ochthebius_hasegawai_NC_052896	Ochthebius_hasegawai_NC_052896	double
3	NC_029408.1	Compsorhipis davidiana	Compsorhipis_davidiana_NC_029408_1	Insecta	Orthoptera	Acrididae	Compsorhipis	Arthropoda	F	H	16085	14760	-0.187	0.00634131	43.9	31.5	14.6	10	75.4	24.6	41.5	0.165	-0.189	-0.165	0.189	Compsorhipis_davidiana_NC_029408_1	0.0823749	5	2.68	Compsorhipis_davidiana_NC_029408	Compsorhipis_davidiana_NC_029408	double
3	NC_042695.1	Ovalipes punctatus	Ovalipes_punctatus_NC_042695_1	Malacostraca	Decapoda	Ovalipidae	Ovalipes	Arthropoda	F	H	16084	14685	-0.218	0.0869809	32.6	35.5	19.4	12.5	68.1	31.9	48	-0.042	-0.218	0.042	0.218	Ovalipes_punctatus_NC_042695_1	0.0869809	5	2.697	Ovalipes_punctatus_NC_042695	Ovalipes_punctatus_NC_042695	double
3	NC_052887.1	Ochthebius remotus	Ochthebius_remotus_NC_052887_1	Insecta	Coleoptera	Hydraenidae	Ochthebius	Arthropoda	F	I	16083	14553	-0.181	0.0589442	40.2	39.1	12.3	8.3	79.3	20.6	47.4	0.014	-0.197	-0.014	0.197	Ochthebius_remotus_NC_052887_1	0.0951315	5	2.492	Ochthebius_remotus_NC_052887	Ochthebius_remotus_NC_052887	double
3	NC_059070.1	Propsilocerus taihuensis	Propsilocerus_taihuensis_NC_059070_1	Insecta	Diptera	Chironomidae	Propsilocerus	Arthropoda	F	H	16083	14815	-0.128	0.012622	37	39.2	13.4	10.4	76.2	23.8	49.6	-0.028	-0.126	0.028	0.126	Propsilocerus_taihuensis_NC_059070_1	0.078841	5	2.519	Propsilocerus_taihuensis_NC_059070	Propsilocerus_taihuensis_NC_059070	double
3	NC_057274.1	Opatrum sabulosum	Opatrum_sabulosum_NC_057274_1	Insecta	Coleoptera	Tenebrionidae	Opatrum	Arthropoda	F	H	16079	14596	-0.278	0.00491324	41.5	31.9	17.1	9.5	73.4	26.6	41.4	0.131	-0.286	-0.131	0.286	Opatrum_sabulosum_NC_057274_1	0.0922321	5	2.548	Opatrum_sabulosum_NC_057274	Opatrum_sabulosum_NC_057274	double
3	NC_041107.1	Pentacheles validus	Pentacheles_validus_NC_041107_1	Malacostraca	Decapoda	Polychelidae	Pentacheles	Arthropoda	F	I	16079	14881	-0.389	0.0717084	33.4	30.9	25	10.8	64.3	35.8	41.7	0.038	-0.397	-0.038	0.397	Pentacheles_validus_NC_041107_1	0.0745071	5	2.85	Pentacheles_validus_NC_041107	Pentacheles_validus_NC_041107	double
3	NC_012838.1	Nerthra indica	Nerthra_indica_NC_012838_1	Insecta	Hemiptera	Gelastocoridae	Nerthra	Arthropoda	F	H	16079	14580	-0.188	0.00304745	43.1	31	16.1	9.7	74.1	25.8	40.7	0.163	-0.247	-0.163	0.247	Nerthra_indica_NC_012838_1	0.0932272	5	2.982	Nerthra_indica_NC_012838	Nerthra_indica_NC_012838	double
3	NC_007102.1	Haematobia irritans irritans	Haematobia_irritans_irritans_NC_007102_1	Insecta	Diptera	Muscidae	Haematobia	Arthropoda	MP	H	16078	14725	-0.125	0.0058465	39.7	39.4	11.8	9.2	79.1	21	48.6	0.004	-0.125	-0.004	0.125	Haematobia_irritans_irritans_NC_007102_1	0.0841523	5	2.429	Haematobia_irritans_irritans_NC_007102	Haematobia_irritans_irritans_NC_007102	double
5	NC_033982.1	Pseudokuzicus pieli	Pseudokuzicus_pieli_NC_033982_1	Insecta	Orthoptera	Tettigoniidae	Pseudokuzicus	Arthropoda	F	H	16077	14730	-0.23	0.00329664	37.6	35.8	16.4	10.3	73.4	26.7	46.1	0.025	-0.227	-0.025	0.227	Pseudokuzicus_pieli_NC_033982_1	0.0837843	5	2.41	Pseudokuzicus_pieli_NC_033982	Pseudokuzicus_pieli_NC_033982	double
3	NC_053546.1	Gryllus bimaculatus	Gryllus_bimaculatus_NC_053546_1	Insecta	Orthoptera	Gryllidae	Gryllus	Arthropoda	F	H	16075	14690	-0.288	0.00211509	40.3	33.8	16.8	9.1	74.1	25.9	42.9	0.089	-0.298	-0.089	0.298	Gryllus_bimaculatus_NC_053546_1	0.0861586	5	2.516	Gryllus_bimaculatus_NC_053546	Gryllus_bimaculatus_NC_053546	double
3	NC_052901.1	Ochthebius nobilis	Ochthebius_nobilis_NC_052901_1	Insecta	Coleoptera	Hydraenidae	Ochthebius	Arthropoda	F	I	16074	14567	-0.135	0.0640164	41.7	38.2	11.5	8.7	79.9	20.2	46.9	0.044	-0.138	-0.044	0.138	Ochthebius_nobilis_NC_052901_1	0.0937539	5	2.456	Ochthebius_nobilis_NC_052901	Ochthebius_nobilis_NC_052901	double
3	NC_037481.1	Gammarus roeselii	Gammarus_roeselii_NC_037481_1	Malacostraca	Amphipoda	Gammaridae	Gammarus	Arthropoda	F	H	16073	13783	-0.266	0.142413	33.9	32.9	20.9	12.3	66.8	33.2	45.2	0.016	-0.259	-0.016	0.259	Gammarus_roeselii_NC_037481_1	0.142475	5	3.241	Gammarus_roeselii_NC_037481	Gammarus_roeselii_NC_037481	double
3	NC_037187.1	Armillifer grandis	Armillifer_grandis_NC_037187_1	Ichthyostraca	Porocephalida	Armilliferidae	Armillifer	Arthropoda	EndoP	L	16073	13691	-0.63	0.00410626	34.6	29.4	29	6.9	64	35.9	36.3	0.081	-0.614	-0.081	0.614	Armillifer_grandis_NC_037187_1	0.148199	5	5.32	Armillifer_grandis_NC_037187	Armillifer_grandis_NC_037187	double
3	NC_030058.1	Hapsodrilus ignifer	Hapsodrilus_ignifer_NC_030058_1	Insecta	Coleoptera	Elateridae	Hapsodrilus	Arthropoda	F	H	16072	14657	-0.232	0.00298656	39	29.2	19.5	12.3	68.2	31.8	41.5	0.144	-0.226	-0.144	0.226	Hapsodrilus_ignifer_NC_030058_1	0.0880413	5	2.628	Hapsodrilus_ignifer_NC_030058	Hapsodrilus_ignifer_NC_030058	double
3	NC_031366.1	Penaeus indicus	Penaeus_indicus_NC_031366_1	Malacostraca	Decapoda	Penaeidae	Penaeus	Arthropoda	F	H	16071	14836	-0.182	0.0145604	33.6	34.5	18.9	13	68.1	31.9	47.5	-0.014	-0.183	0.014	0.183	Penaeus_indicus_NC_031366_1	0.0768465	5	2.354	Penaeus_indicus_NC_031366	Penaeus_indicus_NC_031366	double
3	NC_052897.1	Ochthebius himalayae	Ochthebius_himalayae_NC_052897_1	Insecta	Coleoptera	Hydraenidae	Ochthebius	Arthropoda	F	I	16069	14555	-0.153	0.0452424	40.2	38.3	12.4	9	78.5	21.4	47.3	0.024	-0.159	-0.024	0.159	Ochthebius_himalayae_NC_052897_1	0.0942187	5	2.456	Ochthebius_himalayae_NC_052897	Ochthebius_himalayae_NC_052897	double
3	NC_047403.1	Hydrotaea dentipes	Hydrotaea_dentipes_NC_047403_1	Insecta	Diptera	Muscidae	Hydrotaea	Arthropoda	F	H	16069	14704	-0.144	0.0650943	40.1	38.5	12.3	9.2	78.6	21.5	47.7	0.021	-0.147	-0.021	0.147	Hydrotaea_dentipes_NC_047403_1	0.0849462	5	2.421	Hydrotaea_dentipes_NC_047403	Hydrotaea_dentipes_NC_047403	double
3	NC_054304.1	Nasimyia megacephala	Nasimyia_megacephala_NC_054304_1	Insecta	Diptera	Stratiomyidae	Nasimyia	Arthropoda	F	H	16069	14788	-0.258	0.0797187	37.5	34.5	17.7	10.2	72	27.9	44.7	0.043	-0.268	-0.043	0.268	Nasimyia_megacephala_NC_054304_1	0.0797187	5	2.399	Nasimyia_megacephala_NC_054304	Nasimyia_megacephala_NC_054304	double
3	NC_042199.1	Antarctoperla michaelseni	Antarctoperla_michaelseni_NC_042199_1	Insecta	Plecoptera	Gripopterygidae	Antarctoperla	Arthropoda	F	H	16069	14755	-0.198	0.00404506	35.7	33.7	18.4	12.2	69.4	30.6	45.9	0.03	-0.201	-0.03	0.201	Antarctoperla_michaelseni_NC_042199_1	0.0817724	5	2.402	Antarctoperla_michaelseni_NC_042199	Antarctoperla_michaelseni_NC_042199	double
3	NC_050326.1	Triatoma lecticularia	Triatoma_lecticularia_NC_050326_1	Insecta	Hemiptera	Reduviidae	Triatoma	Arthropoda	MP	H	16067	14509	-0.228	0.0851435	39.5	30.2	18.6	11.7	69.7	30.3	41.9	0.133	-0.23	-0.133	0.23	Triatoma_lecticularia_NC_050326_1	0.0969689	5	2.872	Triatoma_lecticularia_NC_050326	Triatoma_lecticularia_NC_050326	double
3	NC_038168.1	Pseudomegarcys japonica	Pseudomegarcys_japonica_NC_038168_1	Insecta	Plecoptera	Perlodidae	Pseudomegarcys	Arthropoda	F	H	16067	14821	-0.279	0.0102073	35.4	31.1	21.5	12	66.5	33.5	43.1	0.066	-0.283	-0.066	0.283	Pseudomegarcys_japonica_NC_038168_1	0.0775503	5	2.395	Pseudomegarcys_japonica_NC_038168	Pseudomegarcys_japonica_NC_038168	double
3	NC_008413.1	Halocaridina rubra	Halocaridina_rubra_NC_008413_1	Malacostraca	Decapoda	Atyidae	Halocaridina	Arthropoda	F	H	16065	14810	-0.299	0.0778089	33.3	29.9	24	12.8	63.2	36.8	42.7	0.055	-0.303	-0.055	0.303	Halocaridina_rubra_NC_008413_1	0.0781201	5	2.675	Halocaridina_rubra_NC_008413	Halocaridina_rubra_NC_008413	double
3	NC_036266.1	Monotoma quadricollis	Monotoma_quadricollis_NC_036266_1	Insecta	Coleoptera	Monotomidae	Monotoma	Arthropoda	F	H	16064	14462	-0.225	0.0412102	40	39.1	12.9	7.9	79.1	20.8	47	0.012	-0.239	-0.012	0.239	Monotoma_quadricollis_NC_036266_1	0.0997261	5	2.644	Monotoma_quadricollis_NC_036266	Monotoma_quadricollis_NC_036266	double
3	NC_023444.1	Neochauliodes bowringi	Neochauliodes_bowringi_NC_023444_1	Insecta	Megaloptera	Corydalidae	Neochauliodes	Arthropoda	F	H	16064	14671	-0.274	0.00404631	39.7	36.9	15	8.5	76.6	23.5	45.4	0.037	-0.277	-0.037	0.277	Neochauliodes_bowringi_NC_023444_1	0.0867156	5	2.322	Neochauliodes_bowringi_NC_023444	Neochauliodes_bowringi_NC_023444	double
3	NC_044699.1	Pterolophia sp. ZJY-2019	Pterolophia_sp__ZJY_2019_NC_044699_1	Insecta	Coleoptera	Cerambycidae	Pterolophia	Arthropoda	F	H	16063	14576	-0.221	0.0217892	37.8	39	14.1	9	76.8	23.1	48	-0.016	-0.219	0.016	0.219	Pterolophia_sp__ZJY_2019_NC_044699_1	0.092573	5	2.649	Pterolophia_sp__ZJY_2019_NC_044699	Pterolophia_sp__ZJY_2019_NC_044699	double
3	NC_025943.1	Upogebia yokoyai	Upogebia_yokoyai_NC_025943_1	Malacostraca	Decapoda	Upogebiidae	Upogebia	Arthropoda	F	H	16063	13521	-0.235	0.0622549	36.7	35.3	17	11	72	28	46.3	0.02	-0.213	-0.02	0.213	Upogebia_yokoyai_NC_025943_1	0.0661769	5	2.534	Upogebia_yokoyai_NC_025943	Upogebia_yokoyai_NC_025943	double
3	NC_052726.1	Chionoecetes japonicus	Chionoecetes_japonicus_NC_052726_1	Malacostraca	Decapoda	Majidae	Chionoecetes	Arthropoda	F	H	16060	14743	-0.215	0.082005	34.9	36.9	17.3	10.9	71.8	28.2	47.8	-0.027	-0.226	0.027	0.226	Chionoecetes_japonicus_NC_052726_1	0.082005	5	2.69	Chionoecetes_japonicus_NC_052726	Chionoecetes_japonicus_NC_052726	double
3	NC_050044.1	Aedes flavopictus	Aedes_flavopictus_NC_050044_1	Insecta	Diptera	Culicidae	Aedes	Arthropoda	MP	H	16060	14799	-0.187	0.00597758	39.7	39	12.7	8.6	78.7	21.3	47.6	0.009	-0.192	-0.009	0.192	Aedes_flavopictus_NC_050044_1	0.0785181	5	2.486	Aedes_flavopictus_NC_050044	Aedes_flavopictus_NC_050044	double
3	NC_052693.1	Ishiharodelphax matsuyamensis	Ishiharodelphax_matsuyamensis_NC_052693_1	Insecta	Hemiptera	Delphacidae	Ishiharodelphax	Arthropoda	F	H	16058	14201	-0.224	0.0112094	43.9	34.4	13	8.7	78.3	21.7	43.1	0.121	-0.201	-0.121	0.201	Ishiharodelphax_matsuyamensis_NC_052693_1	0.115643	5	3.869	Ishiharodelphax_matsuyamensis_NC_052693	Ishiharodelphax_matsuyamensis_NC_052693	double
3	NC_052893.1	Ochthebius deletus	Ochthebius_deletus_NC_052893_1	Insecta	Coleoptera	Hydraenidae	Ochthebius	Arthropoda	F	I	16057	14570	-0.143	0.0599116	40.9	39.3	11.3	8.4	80.2	19.7	47.7	0.02	-0.147	-0.02	0.147	Ochthebius_deletus_NC_052893_1	0.0926076	5	2.479	Ochthebius_deletus_NC_052893	Ochthebius_deletus_NC_052893	double
3	NC_015093.1	Chrysoperla nipponensis	Chrysoperla_nipponensis_NC_015093_1	Insecta	Neuroptera	Chrysopidae	Chrysoperla	Arthropoda	F	H	16057	14660	-0.13	0.00952855	39.2	39.7	12	9.1	78.9	21.1	48.8	-0.007	-0.138	0.007	0.138	Chrysoperla_nipponensis_NC_015093_1	0.0870026	5	2.368	Chrysoperla_nipponensis_NC_015093	Chrysoperla_nipponensis_NC_015093	double
3	NC_033992.1	Pseudorhynchus acuminatus	Pseudorhynchus_acuminatus_NC_033992_1	Insecta	Orthoptera	Tettigoniidae	Pseudorhynchus	Arthropoda	F	H	16056	14793	-0.256	0.0093423	38.1	33.6	17.8	10.5	71.7	28.3	44.1	0.062	-0.256	-0.062	0.256	Pseudorhynchus_acuminatus_NC_033992_1	0.0786622	5	2.423	Pseudorhynchus_acuminatus_NC_033992	Pseudorhynchus_acuminatus_NC_033992	double
3	NC_061032.1	Melanostoma mellinum	Melanostoma_mellinum_NC_061032_1	Insecta	Diptera	Syrphidae	Melanostoma	Arthropoda	F	H	16055	14770	-0.122	0.0251012	41.2	40	10.6	8.2	81.2	18.8	48.2	0.014	-0.123	-0.014	0.123	Melanostoma_mellinum_NC_061032_1	0.0800374	5	2.474	Melanostoma_mellinum_NC_061032	Melanostoma_mellinum_NC_061032	double
3	NC_007702.1	Tamolanica tamolana	Tamolanica_tamolana_NC_007702_1	Insecta	Mantodea	Mantidae	Tamolanica	Arthropoda	F	H	16055	14714	-0.234	0.0231081	39.8	35.4	15.3	9.4	75.2	24.7	44.8	0.059	-0.236	-0.059	0.236	Tamolanica_tamolana_NC_007702_1	0.0835254	5	2.668	Tamolanica_tamolana_NC_007702	Tamolanica_tamolana_NC_007702	double
3	NC_052898.1	Ochthebius lividipennis	Ochthebius_lividipennis_NC_052898_1	Insecta	Coleoptera	Hydraenidae	Ochthebius	Arthropoda	F	I	16054	14569	-0.154	0.0260371	40.5	39.4	11.7	8.4	79.9	20.1	47.8	0.013	-0.16	-0.013	0.16	Ochthebius_lividipennis_NC_052898_1	0.0925003	5	2.49	Ochthebius_lividipennis_NC_052898	Ochthebius_lividipennis_NC_052898	double
3	NC_035311.1	Nurudea ibofushi	Nurudea_ibofushi_NC_035311_1	Insecta	Hemiptera	Pemphigidae	Nurudea	Arthropoda	F	H	16054	14388	-0.286	0.103775	45.1	39	10.2	5.6	84.1	15.8	44.6	0.072	-0.295	-0.072	0.295	Nurudea_ibofushi_NC_035311_1	0.103775	5	3.953	Nurudea_ibofushi_NC_035311	Nurudea_ibofushi_NC_035311	double
3	NC_059808.1	Bambusicaliscelis flavus	Bambusicaliscelis_flavus_NC_059808_1	Insecta	Hemiptera	Caliscelidae	Bambusicaliscelis	Arthropoda	F	H	16053	14430	-0.281	0.0189996	47.5	32	13.2	7.2	79.5	20.4	39.2	0.194	-0.293	-0.194	0.293	Bambusicaliscelis_flavus_NC_059808_1	0.101103	5	3.592	Bambusicaliscelis_flavus_NC_059808	Bambusicaliscelis_flavus_NC_059808	double
3	NC_011119.1	Locusta migratoria migratoria	Locusta_migratoria_migratoria_NC_011119_1	Insecta	Orthoptera	Acrididae	Locusta	Arthropoda	F	H	16053	14760	-0.176	0.00647854	44.8	30.7	14.6	9.9	75.5	24.5	40.6	0.186	-0.19	-0.186	0.19	Locusta_migratoria_migratoria_NC_011119_1	0.0805457	5	2.754	Locusta_migratoria_migratoria_NC_011119	Locusta_migratoria_migratoria_NC_011119	double
3	NC_037826.1	Culex chidesteri	Culex_chidesteri_NC_037826_1	Insecta	Diptera	Culicidae	Culex	Arthropoda	MP	H	16052	14797	-0.156	0.00373785	40.1	39.4	11.9	8.5	79.5	20.4	47.9	0.009	-0.168	-0.009	0.168	Culex_chidesteri_NC_037826_1	0.0781834	5	2.485	Culex_chidesteri_NC_037826	Culex_chidesteri_NC_037826	double
3	NC_058007.1	Stenopsyche tienmushanensis	Stenopsyche_tienmushanensis_NC_058007_1	Insecta	Trichoptera	Stenopsychidae	Stenopsyche	Arthropoda	F	H	16049	14751	-0.321	0.00965792	42	35.9	14.6	7.6	77.9	22.2	43.5	0.078	-0.315	-0.078	0.315	Stenopsyche_tienmushanensis_NC_058007_1	0.0808773	5	3.542	Stenopsyche_tienmushanensis_NC_058007	Stenopsyche_tienmushanensis_NC_058007	double
3	NC_033340.1	Trichodes sinae	Trichodes_sinae_NC_033340_1	Insecta	Coleoptera	Cleridae	Trichodes	Arthropoda	Parasitoid	H	16047	14588	-0.191	0.00641864	41.1	38.3	12.4	8.3	79.4	20.7	46.6	0.035	-0.201	-0.035	0.201	Trichodes_sinae_NC_033340_1	0.0909204	5	2.574	Trichodes_sinae_NC_033340	Trichodes_sinae_NC_033340	double
3	NC_053847.1	Ceratitis rosa	Ceratitis_rosa_NC_053847_1	Insecta	Diptera	Tephritidae	Ceratitis	Arthropoda	F	H	16047	14761	-0.192	0.0160778	39.5	37.9	13.5	9.1	77.4	22.6	47	0.021	-0.194	-0.021	0.194	Ceratitis_rosa_NC_053847_1	0.0801396	5	2.39	Ceratitis_rosa_NC_053847	Ceratitis_rosa_NC_053847	double
3	NC_032386.1	Schlechtendalia chinensis	Schlechtendalia_chinensis_NC_032386_1	Insecta	Hemiptera	Pemphigidae	Schlechtendalia	Arthropoda	F	H	16047	14530	-0.291	0.0945348	45.1	39.1	10.2	5.6	84.2	15.8	44.7	0.072	-0.295	-0.072	0.295	Schlechtendalia_chinensis_NC_032386_1	0.0945348	5	3.956	Schlechtendalia_chinensis_NC_032386	Schlechtendalia_chinensis_NC_032386	double
3	NC_038140.1	Russelliana solanicola	Russelliana_solanicola_NC_038140_1	Insecta	Hemiptera	Psyllidae	Russelliana	Arthropoda	F	H	16047	14049	-0.217	0.0346482	37.3	35	16.7	11	72.3	27.7	46	0.032	-0.206	-0.032	0.206	Russelliana_solanicola_NC_038140_1	0.124509	5	4.29	Russelliana_solanicola_NC_038140	Russelliana_solanicola_NC_038140	double
3	NC_060317.1	Turanogryllus eous	Turanogryllus_eous_NC_060317_1	Insecta	Orthoptera	Gryllidae	Turanogryllus	Arthropoda	F	H	16045	14690	-0.345	0.00392646	40.1	31	19.4	9.6	71.1	29	40.6	0.127	-0.339	-0.127	0.339	Turanogryllus_eous_NC_060317_1	0.08445	5	2.56	Turanogryllus_eous_NC_060317	Turanogryllus_eous_NC_060317	double
3	NC_033853.1	Pseudocosmetura anjiensis	Pseudocosmetura_anjiensis_NC_033853_1	Insecta	Orthoptera	Tettigoniidae	Pseudocosmetura	Arthropoda	F	H	16044	14724	-0.257	0.00492396	37.1	34.2	18	10.6	71.3	28.6	44.8	0.04	-0.258	-0.04	0.258	Pseudocosmetura_anjiensis_NC_033853_1	0.0822737	5	2.372	Pseudocosmetura_anjiensis_NC_033853	Pseudocosmetura_anjiensis_NC_033853	double
3	NC_014402.1	Bactrocera minax	Bactrocera_minax_NC_014402_1	Insecta	Diptera	Tephritidae	Bactrocera	Arthropoda	F	H	16043	14723	-0.312	0.0112198	38	29.2	21.5	11.2	67.2	32.7	40.4	0.131	-0.316	-0.131	0.316	Bactrocera_minax_NC_014402_1	0.0822789	5	2.464	Bactrocera_minax_NC_014402	Bactrocera_minax_NC_014402	double
6	NC_023809.1	Engaeus cunicularius	Engaeus_cunicularius_NC_023809_1	Malacostraca	Decapoda	Parastacidae	Engaeus	Arthropoda	F	H	16042	14717	-0.324	0.0825334	33.5	33.6	21.9	11	67.1	32.9	44.6	0	-0.334	0	0.334	Engaeus_cunicularius_NC_023809_1	0.0825957	5	2.776	Engaeus_cunicularius_NC_023809	Engaeus_cunicularius_NC_023809	double
3	NC_059035.1	Propsilocerus akamusi	Propsilocerus_akamusi_NC_059035_1	Insecta	Diptera	Chironomidae	Propsilocerus	Arthropoda	F	H	16042	14821	-0.119	0.0100362	37.9	39.9	12.5	9.7	77.8	22.2	49.6	-0.026	-0.125	0.026	0.125	Propsilocerus_akamusi_NC_059035_1	0.0100362	5	2.504	Propsilocerus_akamusi_NC_059035	Propsilocerus_akamusi_NC_059035	double
3	NC_026885.1	Penaeus penicillatus	Penaeus_penicillatus_NC_026885_1	Malacostraca	Decapoda	Penaeidae	Penaeus	Arthropoda	F	H	16040	14859	-0.21	0.0112843	34.1	34.1	19.3	12.5	68.2	31.8	46.6	-0.001	-0.215	0.001	0.215	Penaeus_penicillatus_NC_026885_1	0.0736284	5	2.357	Penaeus_penicillatus_NC_026885	Penaeus_penicillatus_NC_026885	double
3	NC_018121.1	Porotermes adamsoni	Porotermes_adamsoni_NC_018121_1	Insecta	Blattodea	Termopsidae	Porotermes	Arthropoda	F	H	16039	14705	-0.28	0.00330445	42.8	24.1	21.3	11.9	66.9	33.2	36	0.28	-0.283	-0.28	0.283	Porotermes_adamsoni_NC_018121_1	0.0831723	5	2.589	Porotermes_adamsoni_NC_018121	Porotermes_adamsoni_NC_018121	double
3	NC_044661.1	Trichoprosopon pallidiventer	Trichoprosopon_pallidiventer_NC_044661_1	Insecta	Diptera	Culicidae	Trichoprosopon	Arthropoda	MP	H	16037	14876	-0.189	0.0104758	39.9	40.1	12	8.1	80	20.1	48.2	-0.002	-0.193	0.002	0.193	Trichoprosopon_pallidiventer_NC_044661_1	0.0723951	5	2.566	Trichoprosopon_pallidiventer_NC_044661	Trichoprosopon_pallidiventer_NC_044661	double
3	NC_011278.1	Polystoechotes punctata	Polystoechotes_punctata_NC_011278_1	Insecta	Neuroptera	Ithonidae	Polystoechotes	Arthropoda	F	H	16036	14710	-0.15	0.012659	38.3	40.6	12.2	8.8	78.9	21	49.4	-0.029	-0.161	0.029	0.161	Polystoechotes_punctata_NC_011278_1	0.0826889	5	2.309	Polystoechotes_punctata_NC_011278	Polystoechotes_punctata_NC_011278	double
3	NC_053729.1	Sarcophaga pauciseta	Sarcophaga_pauciseta_NC_053729_1	Insecta	Diptera	Sarcophagidae	Sarcophaga	Arthropoda	F	H	16035	14745	-0.279	0.00392891	39	35.5	16.4	9.2	74.5	25.6	44.7	0.046	-0.281	-0.046	0.281	Sarcophaga_pauciseta_NC_053729_1	0.080449	5	2.458	Sarcophaga_pauciseta_NC_053729	Sarcophaga_pauciseta_NC_053729	double
3	NC_053846.1	Ceratitis quilicii	Ceratitis_quilicii_NC_053846_1	Insecta	Diptera	Tephritidae	Ceratitis	Arthropoda	F	H	16035	14761	-0.189	0.0148425	39.5	38	13.4	9.1	77.5	22.5	47.1	0.02	-0.189	-0.02	0.189	Ceratitis_quilicii_NC_053846_1	0.0794512	5	2.395	Ceratitis_quilicii_NC_053846	Ceratitis_quilicii_NC_053846	double
3	NC_030002.1	Panchlora nivea	Panchlora_nivea_NC_030002_1	Insecta	Blattodea	Blaberidae	Panchlora	Arthropoda	F	H	16034	14686	-0.176	0.0119122	39.5	34.8	15.2	10.4	74.3	25.6	45.2	0.063	-0.189	-0.063	0.189	Panchlora_nivea_NC_030002_1	0.0840713	5	2.438	Panchlora_nivea_NC_030002	Panchlora_nivea_NC_030002	double
3	NC_038167.1	Isoperla eximia	Isoperla_eximia_NC_038167_1	Insecta	Plecoptera	Perlodidae	Isoperla	Arthropoda	F	H	16034	14816	-0.226	0.0108519	35	32.8	19.8	12.4	67.8	32.2	45.2	0.031	-0.231	-0.031	0.231	Isoperla_eximia_NC_038167_1	0.0759636	5	2.404	Isoperla_eximia_NC_038167	Isoperla_eximia_NC_038167	double
3	NC_042179.1	Saccharosydne procerus	Saccharosydne_procerus_NC_042179_1	Insecta	Hemiptera	Delphacidae	Saccharosydne	Arthropoda	F	H	16031	14191	-0.221	0.0111035	45.6	34.9	11.9	7.6	80.5	19.5	42.5	0.133	-0.22	-0.133	0.22	Saccharosydne_procerus_NC_042179_1	0.114778	5	3.709	Saccharosydne_procerus_NC_042179	Saccharosydne_procerus_NC_042179	double
3	NC_053906.1	Monochamus sparsutus	Monochamus_sparsutus_NC_053906_1	Insecta	Coleoptera	Cerambycidae	Monochamus	Arthropoda	F	H	16029	14571	-0.182	0.00480379	39.4	38.4	13.4	8.8	77.8	22.2	47.2	0.013	-0.21	-0.013	0.21	Monochamus_sparsutus_NC_053906_1	0.0909601	5	2.656	Monochamus_sparsutus_NC_053906	Monochamus_sparsutus_NC_053906	double
3	NC_017007.1	Philanthus triangulum	Philanthus_triangulum_NC_017007_1	Insecta	Hymenoptera	Crabronidae	Philanthus	Arthropoda	F	H	16029	14773	-0.255	0.013538	44.4	39.2	10.2	6.1	83.6	16.3	45.3	0.062	-0.249	-0.062	0.249	Philanthus_triangulum_NC_017007_1	0.078358	5	4.14	Philanthus_triangulum_NC_017007	Philanthus_triangulum_NC_017007	double
3	NC_046578.1	Thaumatosmylus hainanus	Thaumatosmylus_hainanus_NC_046578_1	Insecta	Neuroptera	Osmylidae	Thaumatosmylus	Arthropoda	F	H	16029	14749	-0.194	0.0109177	38.3	39.6	13.3	8.8	77.9	22.1	48.4	-0.016	-0.204	0.016	0.204	Thaumatosmylus_hainanus_NC_046578_1	0.0798553	5	2.371	Thaumatosmylus_hainanus_NC_046578	Thaumatosmylus_hainanus_NC_046578	double
3	NC_027672.1	Luehdorfia chinensis	Luehdorfia_chinensis_NC_027672_1	Insecta	Lepidoptera	Papilionidae	Luehdorfia	Arthropoda	F	H	16028	14740	-0.206	0.0120414	40.6	41.3	10.9	7.1	81.9	18	48.4	-0.008	-0.211	0.008	0.211	Luehdorfia_chinensis_NC_027672_1	0.0803594	5	2.596	Luehdorfia_chinensis_NC_027672	Luehdorfia_chinensis_NC_027672	double
6	NC_023477.1	Engaeus lyelli	Engaeus_lyelli_NC_023477_1	Malacostraca	Decapoda	Parastacidae	Engaeus	Arthropoda	F	H	16027	14667	-0.369	0.0847944	31.4	29	27.1	12.4	60.4	39.5	41.4	0.04	-0.371	-0.04	0.371	Engaeus_lyelli_NC_023477_1	0.0848568	5	2.811	Engaeus_lyelli_NC_023477	Engaeus_lyelli_NC_023477	double
3	NC_039179.1	Metapenaeus affinis	Metapenaeus_affinis_NC_039179_1	Malacostraca	Decapoda	Penaeidae	Metapenaeus	Arthropoda	F	H	16027	14815	-0.259	0.00892244	34.6	31.3	21.5	12.6	65.9	34.1	43.9	0.05	-0.26	-0.05	0.26	Metapenaeus_affinis_NC_039179_1	0.0756224	5	2.355	Metapenaeus_affinis_NC_039179	Metapenaeus_affinis_NC_039179	double
3	NC_054326.1	Ochlerotatus vittiger	Ochlerotatus_vittiger_NC_054326_1	Insecta	Diptera	Culicidae	Ochlerotatus	Arthropoda	MP	H	16027	14802	-0.161	0.00511637	40.1	39.2	12.1	8.6	79.3	20.7	47.8	0.011	-0.17	-0.011	0.17	Ochlerotatus_vittiger_NC_054326_1	0.0764335	5	2.474	Ochlerotatus_vittiger_NC_054326	Ochlerotatus_vittiger_NC_054326	double
3	NC_005037.1	Portunus trituberculatus	Portunus_trituberculatus_NC_005037_1	Malacostraca	Decapoda	Portunidae	Portunus	Arthropoda	F	H	16026	14794	-0.237	0.0768751	33.3	36.9	18.5	11.3	70.2	29.8	48.2	-0.051	-0.241	0.051	0.241	Portunus_trituberculatus_NC_005037_1	0.0768751	5	2.774	Portunus_trituberculatus_NC_005037	Portunus_trituberculatus_NC_005037	double
3	NC_053870.1	Cicadetta abscondita	Cicadetta_abscondita_NC_053870_1	Insecta	Hemiptera	Cicadidae	Cicadetta	Arthropoda	F	H	16026	14341	-0.01	0.0320105	38.5	40.6	10.5	10.4	79.1	20.9	51	-0.027	-0.003	0.027	0.003	Cicadetta_abscondita_NC_053870_1	0.105142	5	3.117	Cicadetta_abscondita_NC_053870	Cicadetta_abscondita_NC_053870	double
3	NC_037207.1	Schizocephala bicornis	Schizocephala_bicornis_NC_037207_1	Insecta	Mantodea	Mantidae	Schizocephala	Arthropoda	F	H	16026	14858	-0.207	0.0196556	38.2	36.7	15.1	10	74.9	25.1	46.7	0.02	-0.204	-0.02	0.204	Schizocephala_bicornis_NC_037207_1	0.0728816	5	2.681	Schizocephala_bicornis_NC_037207	Schizocephala_bicornis_NC_037207	double
3	NC_028225.1	Portunus sanguinolentus	Portunus_sanguinolentus_NC_028225_1	Malacostraca	Decapoda	Portunidae	Portunus	Arthropoda	F	H	16024	14794	-0.246	0.0767599	31.6	34	21.5	12.9	65.6	34.4	46.9	-0.037	-0.25	0.037	0.25	Portunus_sanguinolentus_NC_028225_1	0.0767599	5	2.767	Portunus_sanguinolentus_NC_028225	Portunus_sanguinolentus_NC_028225	double
3	NC_044669.1	Drosophila mercatorum	Drosophila_mercatorum_NC_044669_1	Insecta	Diptera	Drosophilidae	Drosophila	Arthropoda	F	H	16024	14726	-0.169	0.0174114	39.5	38.3	13	9.2	77.8	22.2	47.5	0.015	-0.174	-0.015	0.174	Drosophila_mercatorum_NC_044669_1	0.0810035	5	2.385	Drosophila_mercatorum_NC_044669	Drosophila_mercatorum_NC_044669	double
3	NC_058611.1	Arma chinensis	Arma_chinensis_NC_058611_1	Insecta	Hemiptera	Pentatomidae	Arma	Arthropoda	F	H	16024	14488	-0.126	0.0124813	42.2	33.7	13.6	10.5	75.9	24.1	44.2	0.112	-0.131	-0.112	0.131	Arma_chinensis_NC_058611_1	0.0958562	5	3.054	Arma_chinensis_NC_058611	Arma_chinensis_NC_058611	double
3	NC_026884.1	Penaeus merguiensis	Penaeus_merguiensis_NC_026884_1	Malacostraca	Decapoda	Penaeidae	Penaeus	Arthropoda	F	H	16023	14851	-0.217	0.0106722	34	33.9	19.5	12.6	67.9	32.1	46.5	0.001	-0.214	-0.001	0.214	Penaeus_merguiensis_NC_026884_1	0.0731449	5	2.36	Penaeus_merguiensis_NC_026884	Penaeus_merguiensis_NC_026884	double
3	NC_057281.1	Perlesta teaysia	Perlesta_teaysia_NC_057281_1	Insecta	Plecoptera	Perlidae	Perlesta	Arthropoda	F	H	16023	14775	-0.291	0.00374462	34.7	30	22.9	12.4	64.7	35.3	42.4	0.073	-0.298	-0.073	0.298	Perlesta_teaysia_NC_057281_1	0.077888	5	2.374	Perlesta_teaysia_NC_057281	Perlesta_teaysia_NC_057281	double
3	NC_042497.1	Alvinocaris longirostris	Alvinocaris_longirostris_NC_042497_1	Malacostraca	Decapoda	Alvinocarididae	Alvinocaris	Arthropoda	F	I	16022	14766	-0.334	0.0783922	33.2	29	25.3	12.5	62.2	37.8	41.5	0.068	-0.339	-0.068	0.339	Alvinocaris_longirostris_NC_042497_1	0.0783922	5	2.504	Alvinocaris_longirostris_NC_042497	Alvinocaris_longirostris_NC_042497	double
3	NC_002660.1	Cochliomyia hominivorax	Cochliomyia_hominivorax_NC_002660_1	Insecta	Diptera	Calliphoridae	Cochliomyia	Arthropoda	Parasitoid	H	16022	14728	-0.203	0.0806391	39.8	37.1	13.9	9.2	76.9	23.1	46.3	0.034	-0.207	-0.034	0.207	Cochliomyia_hominivorax_NC_002660_1	0.080764	5	2.425	Cochliomyia_hominivorax_NC_002660	Cochliomyia_hominivorax_NC_002660	double
3	NC_023825.1	Drosophila santomea	Drosophila_santomea_NC_023825_1	Insecta	Diptera	Drosophilidae	Drosophila	Arthropoda	F	H	16022	14759	-0.134	0.0115466	39.5	39.1	12.2	9.2	78.6	21.4	48.3	0.006	-0.137	-0.006	0.137	Drosophila_santomea_NC_023825_1	0.0788291	5	2.377	Drosophila_santomea_NC_023825	Drosophila_santomea_NC_023825	double
3	NC_060505.1	Drosophila malagassya	Drosophila_malagassya_NC_060505_1	Insecta	Diptera	Drosophilidae	Drosophila	Arthropoda	F	H	16019	14757	-0.134	0.0115488	37.6	36.5	11.6	8.9	74.1	20.5	45.4	0.014	-0.133	-0.014	0.133	Drosophila_malagassya_NC_060505_1	0.0787814	5	2.365	Drosophila_malagassya_NC_060505	Drosophila_malagassya_NC_060505	double
3	NC_060568.1	Drosophila aff. tsacasi AY-2019	Drosophila_aff__tsacasi_AY_2019_NC_060568_1	Insecta	Diptera	Drosophilidae	Drosophila	Arthropoda	F	H	16019	14757	-0.126	0.0115488	38.8	38	11.6	8.9	76.8	20.5	46.9	0.01	-0.128	-0.01	0.128	Drosophila_aff__tsacasi_AY_2019_NC_060568_1	0.0787814	5	2.37	Drosophila_aff__tsacasi_AY_2019_NC_060568	Drosophila_aff__tsacasi_AY_2019_NC_060568	double
3	NC_001322.1	Drosophila yakuba	Drosophila_yakuba_NC_001322_1	Insecta	Diptera	Drosophilidae	Drosophila	Arthropoda	F	H	16019	14757	-0.133	0.0115488	39.5	39.1	12.2	9.2	78.6	21.4	48.3	0.005	-0.136	-0.005	0.136	Drosophila_yakuba_NC_001322_1	0.0787814	5	2.379	Drosophila_yakuba_NC_001322	Drosophila_yakuba_NC_001322	double
3	NC_060502.1	Drosophila bocqueti	Drosophila_bocqueti_NC_060502_1	Insecta	Diptera	Drosophilidae	Drosophila	Arthropoda	F	H	16019	14757	-0.133	0.0115488	38.9	37.6	11.6	8.9	76.5	20.5	46.5	0.017	-0.134	-0.017	0.134	Drosophila_bocqueti_NC_060502_1	0.0787814	5	2.367	Drosophila_bocqueti_NC_060502	Drosophila_bocqueti_NC_060502	double
3	NC_060565.1	Drosophila chocolata	Drosophila_chocolata_NC_060565_1	Insecta	Diptera	Drosophilidae	Drosophila	Arthropoda	F	H	16019	14757	-0.129	0.0115488	39	37.7	11.5	8.9	76.7	20.4	46.6	0.017	-0.128	-0.017	0.128	Drosophila_chocolata_NC_060565_1	0.0787814	5	2.368	Drosophila_chocolata_NC_060565	Drosophila_chocolata_NC_060565	double
3	NC_060567.1	Drosophila mylenae	Drosophila_mylenae_NC_060567_1	Insecta	Diptera	Drosophilidae	Drosophila	Arthropoda	F	H	16019	14757	-0.125	0.0115488	38.8	37.8	11.5	8.9	76.6	20.4	46.7	0.014	-0.125	-0.014	0.125	Drosophila_mylenae_NC_060567_1	0.0787814	5	2.365	Drosophila_mylenae_NC_060567	Drosophila_mylenae_NC_060567	double
3	NC_060506.1	Drosophila seguyi	Drosophila_seguyi_NC_060506_1	Insecta	Diptera	Drosophilidae	Drosophila	Arthropoda	F	H	16019	14757	-0.133	0.0115488	38.5	37.4	11.6	8.8	75.9	20.4	46.2	0.014	-0.134	-0.014	0.134	Drosophila_seguyi_NC_060506_1	0.0787814	5	2.366	Drosophila_seguyi_NC_060506	Drosophila_seguyi_NC_060506	double
3	NC_060503.1	Drosophila burlai	Drosophila_burlai_NC_060503_1	Insecta	Diptera	Drosophilidae	Drosophila	Arthropoda	F	H	16019	14757	-0.129	0.0115488	38.9	37.9	11.6	8.9	76.8	20.5	46.8	0.014	-0.131	-0.014	0.131	Drosophila_burlai_NC_060503_1	0.0787814	5	2.367	Drosophila_burlai_NC_060503	Drosophila_burlai_NC_060503	double
3	NC_060566.1	Drosophila curta	Drosophila_curta_NC_060566_1	Insecta	Diptera	Drosophilidae	Drosophila	Arthropoda	F	H	16019	14757	-0.136	0.0115488	38.5	37.4	11.7	8.8	75.9	20.5	46.2	0.015	-0.138	-0.015	0.138	Drosophila_curta_NC_060566_1	0.0787814	5	2.365	Drosophila_curta_NC_060566	Drosophila_curta_NC_060566	double
3	NC_060504.1	Drosophila leontia	Drosophila_leontia_NC_060504_1	Insecta	Diptera	Drosophilidae	Drosophila	Arthropoda	F	H	16019	14757	-0.126	0.0115488	38.2	37.1	11.3	8.8	75.3	20.1	45.9	0.014	-0.128	-0.014	0.128	Drosophila_leontia_NC_060504_1	0.0787814	5	2.364	Drosophila_leontia_NC_060504	Drosophila_leontia_NC_060504	double
3	NC_056249.1	Lycorma meliae	Lycorma_meliae_NC_056249_1	Insecta	Hemiptera	Fulgoridae	Lycorma	Arthropoda	F	H	16019	14239	-0.298	0.00299644	49.1	27.1	15.3	8.5	76.2	23.8	35.6	0.288	-0.288	-0.288	0.288	Lycorma_meliae_NC_056249_1	0.111118	5	3.572	Lycorma_meliae_NC_056249	Lycorma_meliae_NC_056249	double
3	NC_056795.1	Megabeleses liriodendrovorax	Megabeleses_liriodendrovorax_NC_056795_1	Insecta	Hymenoptera	Tenthredinidae	Megabeleses	Arthropoda	F	H	16019	15042	-0.215	0.0137961	41.8	39.2	11.5	7.5	81	19	46.7	0.033	-0.209	-0.033	0.209	Megabeleses_liriodendrovorax_NC_056795_1	0.0609901	5	2.951	Megabeleses_liriodendrovorax_NC_056795	Megabeleses_liriodendrovorax_NC_056795	double
7	NC_039966.1	Mongoloniscus sinensis	Mongoloniscus_sinensis_NC_039966_1	Malacostraca	Isopoda	Trachelipodidae	Mongoloniscus	Arthropoda	F	H	16018	13853	0.14	0.113872	37.1	38.2	10.7	14	75.3	24.7	52.2	-0.014	0.134	0.014	-0.134	Mongoloniscus_sinensis_NC_039966_1	0.13516	5	3.003	Mongoloniscus_sinensis_NC_039966	Mongoloniscus_sinensis_NC_039966	double
3	NC_039664.1	Cacoplistes rogenhoferi	Cacoplistes_rogenhoferi_NC_039664_1	Insecta	Orthoptera	Phalangopsidae	Cacoplistes	Arthropoda	F	H	16018	14658	-0.322	0.00599326	39.1	34.2	17.8	8.9	73.3	26.7	43.1	0.068	-0.332	-0.068	0.332	Cacoplistes_rogenhoferi_NC_039664_1	0.0849045	5	2.578	Cacoplistes_rogenhoferi_NC_039664	Cacoplistes_rogenhoferi_NC_039664	double
3	NC_011596.1	Drosophila littoralis	Drosophila_littoralis_NC_011596_1	Insecta	Diptera	Drosophilidae	Drosophila	Arthropoda	F	H	16017	14744	-0.176	0.0156084	38.6	37.6	14	9.7	76.2	23.7	47.3	0.012	-0.183	-0.012	0.183	Drosophila_littoralis_NC_011596_1	0.0794781	5	2.381	Drosophila_littoralis_NC_011596	Drosophila_littoralis_NC_011596	double
3	NC_059934.1	Haematopota vexativa	Haematopota_vexativa_NC_059934_1	Insecta	Diptera	Tabanidae	Haematopota	Arthropoda	MP	H	16017	14817	-0.165	0.00480739	38.9	38.8	13	9.3	77.7	22.3	48.1	0.001	-0.168	-0.001	0.168	Haematopota_vexativa_NC_059934_1	0.0749204	5	2.319	Haematopota_vexativa_NC_059934	Haematopota_vexativa_NC_059934	double
3	NC_035497.1	Ceratitis fasciventris	Ceratitis_fasciventris_NC_035497_1	Insecta	Diptera	Tephritidae	Ceratitis	Arthropoda	F	H	16017	14776	-0.19	0.0135481	39.5	37.7	13.6	9.3	77.2	22.9	47	0.022	-0.189	-0.022	0.189	Ceratitis_fasciventris_NC_035497_1	0.0774802	5	2.396	Ceratitis_fasciventris_NC_035497	Ceratitis_fasciventris_NC_035497	double
3	NC_049088.1	Dolichoderus quadripunctatus	Dolichoderus_quadripunctatus_NC_049088_1	Insecta	Hymenoptera	Formicidae	Dolichoderus	Arthropoda	F	H	16017	14364	-0.298	0.0681776	41.8	40	11.9	6.3	81.8	18.2	46.3	0.022	-0.308	-0.022	0.308	Dolichoderus_quadripunctatus_NC_049088_1	0.103203	5	4.098	Dolichoderus_quadripunctatus_NC_049088	Dolichoderus_quadripunctatus_NC_049088	double
3	NC_060809.1	Ricania fumosa	Ricania_fumosa_NC_060809_1	Insecta	Hemiptera	Ricaniidae	Ricania	Arthropoda	F	H	16016	14263	-0.229	0.00630619	48.1	28	14.7	9.3	76.1	24	37.3	0.264	-0.223	-0.264	0.223	Ricania_fumosa_NC_060809_1	0.109453	5	3.544	Ricania_fumosa_NC_060809	Ricania_fumosa_NC_060809	double
3	NC_059862.1	Telenomus remus	Telenomus_remus_NC_059862_1	Insecta	Hymenoptera	Scelionidae	Telenomus	Arthropoda	Parasitoid	H	16014	14623	-0.173	0.0180467	44.9	40.5	8.5	6.1	85.4	14.6	46.6	0.052	-0.166	-0.052	0.166	Telenomus_remus_NC_059862_1	0.0868615	5	4.379	Telenomus_remus_NC_059862	Telenomus_remus_NC_059862	double
3	NC_025322.1	Plutella xylostella	Plutella_xylostella_NC_025322_1	Insecta	Lepidoptera	Plutellidae	Plutella	Arthropoda	F	H	16014	14804	-0.169	0.0201074	40.9	40.5	10.9	7.7	81.4	18.6	48.2	0.005	-0.173	-0.005	0.173	Plutella_xylostella_NC_025322_1	0.0755589	5	2.486	Plutella_xylostella_NC_025322	Plutella_xylostella_NC_025322	double
3	NC_060771.1	Parascaphoidella transversa	Parascaphoidella_transversa_NC_060771_1	Insecta	Hemiptera	Cicadellidae	Parascaphoidella	Arthropoda	F	H	16011	14306	-0.169	0.00699519	40.5	33.9	14.9	10.7	74.4	25.6	44.6	0.088	-0.162	-0.088	0.162	Parascaphoidella_transversa_NC_060771_1	0.106489	5	3.284	Parascaphoidella_transversa_NC_060771	Parascaphoidella_transversa_NC_060771	double
3	NC_044706.1	Maurya qinlingensis	Maurya_qinlingensis_NC_044706_1	Insecta	Hemiptera	Membracidae	Maurya	Arthropoda	F	H	16011	14212	-0.138	0.000624571	43.2	34.4	12.5	9.8	77.6	22.3	44.2	0.114	-0.12	-0.114	0.12	Maurya_qinlingensis_NC_044706_1	0.11236	5	3.44	Maurya_qinlingensis_NC_044706	Maurya_qinlingensis_NC_044706	double
3	NC_036745.1	Gonopsis affinis	Gonopsis_affinis_NC_036745_1	Insecta	Hemiptera	Pentatomidae	Gonopsis	Arthropoda	F	H	16011	14523	-0.112	0.0110549	45.9	32.5	12.1	9.5	78.4	21.6	42	0.17	-0.117	-0.17	0.117	Gonopsis_affinis_NC_036745_1	0.0929361	5	3.053	Gonopsis_affinis_NC_036745	Gonopsis_affinis_NC_036745	double
3	NC_046422.1	Acropyga guianensis	Acropyga_guianensis_NC_046422_1	Insecta	Hymenoptera	Formicidae	Acropyga	Arthropoda	F	H	16011	14727	-0.268	0.0796328	42.3	42.9	9.4	5.4	85.2	14.8	48.3	-0.007	-0.273	0.007	0.273	Acropyga_guianensis_NC_046422_1	0.0801949	5	4.371	Acropyga_guianensis_NC_046422	Acropyga_guianensis_NC_046422	double
3	NC_042173.1	Metapenaeus joyneri	Metapenaeus_joyneri_NC_042173_1	Malacostraca	Decapoda	Penaeidae	Metapenaeus	Arthropoda	F	H	16008	14857	-0.218	0.0089955	35.5	32.7	19.4	12.4	68.2	31.8	45.1	0.041	-0.218	-0.041	0.218	Metapenaeus_joyneri_NC_042173_1	0.0719015	5	2.37	Metapenaeus_joyneri_NC_042173	Metapenaeus_joyneri_NC_042173	double
3	NC_030059.1	Pyrearinus termitilluminans	Pyrearinus_termitilluminans_NC_030059_1	Insecta	Coleoptera	Elateridae	Pyrearinus	Arthropoda	F	H	16007	14664	-0.319	0.00187418	39.7	23.4	24.3	12.5	63.1	36.8	35.9	0.259	-0.32	-0.259	0.32	Pyrearinus_termitilluminans_NC_030059_1	0.0839008	5	2.689	Pyrearinus_termitilluminans_NC_030059	Pyrearinus_termitilluminans_NC_030059	double
3	NC_035405.1	Typhlatya monae	Typhlatya_monae_NC_035405_1	Malacostraca	Decapoda	Atyidae	Typhlatya	Arthropoda	F	I	16007	14695	-0.304	0.0815268	36.2	30.6	21.6	11.6	66.8	33.2	42.2	0.084	-0.303	-0.084	0.303	Typhlatya_monae_NC_035405_1	0.0819641	5	2.621	Typhlatya_monae_NC_035405	Typhlatya_monae_NC_035405	double
3	NC_023219.1	Leptobelus gazella	Leptobelus_gazella_NC_023219_1	Insecta	Hemiptera	Membracidae	Leptobelus	Arthropoda	F	H	16007	14233	-0.237	0.00149934	45.1	33.7	12.8	8.4	78.8	21.2	42.1	0.144	-0.207	-0.144	0.207	Leptobelus_gazella_NC_023219_1	0.110827	5	3.406	Leptobelus_gazella_NC_023219	Leptobelus_gazella_NC_023219	double
3	NC_028158.1	Phyllomimus detersus	Phyllomimus_detersus_NC_028158_1	Insecta	Orthoptera	Tettigoniidae	Phyllomimus	Arthropoda	F	H	16007	14848	-0.322	0.0168051	37.7	34	18.7	9.6	71.7	28.3	43.6	0.052	-0.323	-0.052	0.323	Phyllomimus_detersus_NC_028158_1	0.0724058	5	2.643	Phyllomimus_detersus_NC_028158	Phyllomimus_detersus_NC_028158	double
3	NC_013251.1	Mongoloraphidia harmandi	Mongoloraphidia_harmandi_NC_013251_1	Insecta	Raphidioptera	Raphidiidae	Mongoloraphidia	Arthropoda	F	H	16006	14576	-0.228	0.00349869	41.1	39.2	12.1	7.6	80.3	19.7	46.8	0.023	-0.228	-0.023	0.228	Mongoloraphidia_harmandi_NC_013251_1	0.0893415	5	2.645	Mongoloraphidia_harmandi_NC_013251	Mongoloraphidia_harmandi_NC_013251	double
3	NC_027489.1	Eurydema gebleri	Eurydema_gebleri_NC_027489_1	Insecta	Hemiptera	Pentatomidae	Eurydema	Arthropoda	F	H	16005	14568	-0.135	0.00924711	41.7	34.6	13.3	10.3	76.3	23.6	44.9	0.093	-0.127	-0.093	0.127	Eurydema_gebleri_NC_027489_1	0.0897844	5	3.023	Eurydema_gebleri_NC_027489	Eurydema_gebleri_NC_027489	double
3	NC_009679.1	Penaeus chinensis	Penaeus_chinensis_NC_009679_1	Malacostraca	Decapoda	Penaeidae	Penaeus	Arthropoda	F	H	16004	14863	-0.205	0.0711072	34	34.8	18.7	12.4	68.8	31.1	47.2	-0.011	-0.203	0.011	0.203	Penaeus_chinensis_NC_009679_1	0.0712947	5	2.362	Penaeus_chinensis_NC_009679	Penaeus_chinensis_NC_009679	double
3	NC_006133.1	Pteronarcys princeps	Pteronarcys_princeps_NC_006133_1	Insecta	Plecoptera	Pteronarcyidae	Pteronarcys	Arthropoda	F	H	16004	14786	-0.219	0.00368658	37.1	34.4	17.5	11.1	71.5	28.6	45.5	0.038	-0.224	-0.038	0.224	Pteronarcys_princeps_NC_006133_1	0.0760435	5	2.406	Pteronarcys_princeps_NC_006133	Pteronarcys_princeps_NC_006133	double
3	NC_036045.1	Hycleus phaleratus	Hycleus_phaleratus_NC_036045_1	Insecta	Coleoptera	Meloidae	Hycleus	Arthropoda	F	H	16003	14609	-0.27	0.0166844	37	32.9	19.1	11	69.9	30.1	43.9	0.059	-0.269	-0.059	0.269	Hycleus_phaleratus_NC_036045_1	0.0871087	5	2.685	Hycleus_phaleratus_NC_036045	Hycleus_phaleratus_NC_036045	double
3	NC_052906.1	Ochthebius viridis	Ochthebius_viridis_NC_052906_1	Insecta	Coleoptera	Hydraenidae	Ochthebius	Arthropoda	F	I	16002	14571	-0.134	0.055993	41.6	39.2	11	8.2	80.8	19.2	47.4	0.03	-0.142	-0.03	0.142	Ochthebius_viridis_NC_052906_1	0.0894263	5	2.523	Ochthebius_viridis_NC_052906	Ochthebius_viridis_NC_052906	double
3	NC_059037.1	Propsilocerus sinicus	Propsilocerus_sinicus_NC_059037_1	Insecta	Diptera	Chironomidae	Propsilocerus	Arthropoda	F	H	16002	14867	-0.142	0.016248	38.4	37.3	13.9	10.4	75.7	24.3	47.7	0.014	-0.146	-0.014	0.146	Propsilocerus_sinicus_NC_059037_1	0.016248	5	2.412	Propsilocerus_sinicus_NC_059037	Propsilocerus_sinicus_NC_059037	double
3	NC_039641.1	Belzebub intermedius	Belzebub_intermedius_NC_039641_1	Malacostraca	Decapoda	Luciferidae	Belzebub	Arthropoda	F	H	16001	14783	-0.114	0.0751828	33.7	37.6	16	12.6	71.3	28.6	50.2	-0.055	-0.118	0.055	0.118	Belzebub_intermedius_NC_039641_1	0.0761202	5	2.636	Belzebub_intermedius_NC_039641	Belzebub_intermedius_NC_039641	double
6	NC_029407.1	Engaewa subcoerulea	Engaewa_subcoerulea_NC_029407_1	Malacostraca	Decapoda	Parastacidae	Engaewa	Arthropoda	F	H	16001	14733	-0.434	0.079245	33.5	28.2	27.5	10.7	61.7	38.2	38.9	0.086	-0.441	-0.086	0.441	Engaewa_subcoerulea_NC_029407_1	0.0791826	5	2.911	Engaewa_subcoerulea_NC_029407	Engaewa_subcoerulea_NC_029407	double
3	NC_026863.1	Argyroneta aquatica	Argyroneta_aquatica_NC_026863_1	Arachnida	Araneae	Dictynidae	Argyroneta	Arthropoda	F	H	16000	12048	0.394	0.151625	31.1	40.8	8.8	18.9	71.9	27.7	59.7	-0.134	0.368	0.134	-0.368	Argyroneta_aquatica_NC_026863_1	0.154062	5	3.621	Argyroneta_aquatica_NC_026863	Argyroneta_aquatica_NC_026863	double
3	NC_016865.1	Fergusonina taylori	Fergusonina_taylori_NC_016865_1	Insecta	Diptera	Fergusoninidae	Fergusonina	Arthropoda	F	H	16000	14716	-0.196	0.0141875	40.9	37.2	13.1	8.8	78.1	21.9	46	0.047	-0.197	-0.047	0.197	Fergusonina_taylori_NC_016865_1	0.08025	5	2.669	Fergusonina_taylori_NC_016865	Fergusonina_taylori_NC_016865	double
3	NC_037697.1	Paratoxodera polyacantha	Paratoxodera_polyacantha_NC_037697_1	Insecta	Mantodea	Toxoderidae	Paratoxodera	Arthropoda	F	H	15999	14977	-0.196	0.0195012	39	35.8	15	10.1	74.8	25.1	45.9	0.044	-0.195	-0.044	0.195	Paratoxodera_polyacantha_NC_037697_1	0.063879	5	2.625	Paratoxodera_polyacantha_NC_037697	Paratoxodera_polyacantha_NC_037697	double
3	NC_045838.1	Monolepta occifluvis	Monolepta_occifluvis_NC_045838_1	Insecta	Coleoptera	Chrysomelidae	Monolepta	Arthropoda	F	H	15998	14534	-0.187	0.00356295	40.6	38.6	12.4	8.3	79.2	20.7	46.9	0.026	-0.198	-0.026	0.198	Monolepta_occifluvis_NC_045838_1	0.0915114	5	2.655	Monolepta_occifluvis_NC_045838	Monolepta_occifluvis_NC_045838	double
3	NC_041143.1	Eristalis tenax	Eristalis_tenax_NC_041143_1	Insecta	Diptera	Syrphidae	Eristalis	Arthropoda	F	H	15996	14750	-0.165	0.0306952	41	39.3	11.5	8.2	80.3	19.7	47.5	0.021	-0.165	-0.021	0.165	Eristalis_tenax_NC_041143_1	0.0778945	5	2.416	Eristalis_tenax_NC_041143	Eristalis_tenax_NC_041143	double
3	NC_006081.1	Squilla mantis	Squilla_mantis_NC_006081_1	Malacostraca	Stomatopoda	Squillidae	Squilla	Arthropoda	F	H	15994	14770	-0.128	0.0226335	35.1	35.1	16.8	13	70.2	29.8	48.1	-0.001	-0.13	0.001	0.13	Squilla_mantis_NC_006081_1	0.0765287	5	2.423	Squilla_mantis_NC_006081	Squilla_mantis_NC_006081	double
3	NC_039110.1	Epixanthus frontalis	Epixanthus_frontalis_NC_039110_1	Malacostraca	Decapoda	Oziidae	Epixanthus	Arthropoda	F	H	15993	14786	-0.3	0.0754705	33.4	32.4	22.3	11.8	65.8	34.1	44.2	0.016	-0.306	-0.016	0.306	Epixanthus_frontalis_NC_039110_1	0.0754705	5	2.672	Epixanthus_frontalis_NC_039110	Epixanthus_frontalis_NC_039110	double
3	NC_057963.1	Olidiana longisticka	Olidiana_longisticka_NC_057963_1	Insecta	Hemiptera	Cicadellidae	Olidiana	Arthropoda	F	H	15993	14178	-0.231	0.000687801	45.7	34	12.2	8.1	79.7	20.3	42.1	0.147	-0.206	-0.147	0.206	Olidiana_longisticka_NC_057963_1	0.113487	5	3.542	Olidiana_longisticka_NC_057963	Olidiana_longisticka_NC_057963	double
3	NC_030001.1	Gromphadorhina portentosa	Gromphadorhina_portentosa_NC_030001_1	Insecta	Blattodea	Blaberidae	Gromphadorhina	Arthropoda	F	H	15992	14584	-0.227	0.0070035	36.4	34.3	17.9	11.3	70.7	29.2	45.6	0.029	-0.227	-0.029	0.227	Gromphadorhina_portentosa_NC_030001_1	0.088044	5	2.487	Gromphadorhina_portentosa_NC_030001	Gromphadorhina_portentosa_NC_030001	double
3	NC_037146.1	Agramma hupehanum	Agramma_hupehanum_NC_037146_1	Insecta	Hemiptera	Tingidae	Agramma	Arthropoda	F	H	15992	14464	-0.204	0.00243872	43.7	34.4	13.3	8.6	78.1	21.9	43	0.119	-0.216	-0.119	0.216	Agramma_hupehanum_NC_037146_1	0.0955478	5	3.27	Agramma_hupehanum_NC_037146	Agramma_hupehanum_NC_037146	double
2	NC_039403.1	Hyalella azteca	Hyalella_azteca_NC_039403_1	Malacostraca	Amphipoda	Hyalellidae	Hyalella	Arthropoda	F	H	15991	14014	0.078	0.117191	28.5	32.6	18.4	20.5	61.1	38.9	53.1	-0.066	0.052	0.066	-0.052	Hyalella_azteca_NC_039403_1	0.123632	5	3.437	Hyalella_azteca_NC_039403	Hyalella_azteca_NC_039403	double
3	NC_027603.1	Paratya australiensis	Paratya_australiensis_NC_027603_1	Malacostraca	Decapoda	Atyidae	Paratya	Arthropoda	F	H	15990	14704	-0.164	0.0804253	35.2	33.5	18.2	13.1	68.7	31.3	46.6	0.023	-0.165	-0.023	0.165	Paratya_australiensis_NC_027603_1	0.0804253	5	2.502	Paratya_australiensis_NC_027603	Paratya_australiensis_NC_027603	double
3	NC_009626.1	Penaeus vannamei	Penaeus_vannamei_NC_009626_1	Malacostraca	Decapoda	Penaeidae	Penaeus	Arthropoda	F	H	15990	14856	-0.192	0.00869293	33	34.7	19.2	13.1	67.7	32.3	47.8	-0.026	-0.192	0.026	0.192	Penaeus_vannamei_NC_009626_1	0.0709193	5	2.349	Penaeus_vannamei_NC_009626	Penaeus_vannamei_NC_009626	double
3	NC_040124.1	Portunus gracilimanus	Portunus_gracilimanus_NC_040124_1	Malacostraca	Decapoda	Portunidae	Portunus	Arthropoda	F	H	15990	14792	-0.257	0.0749218	34	35.7	19	11.2	69.7	30.2	46.9	-0.024	-0.258	0.024	0.258	Portunus_gracilimanus_NC_040124_1	0.0749218	5	2.798	Portunus_gracilimanus_NC_040124	Portunus_gracilimanus_NC_040124	double
3	NC_034937.1	Gammarus fossarum	Gammarus_fossarum_NC_034937_1	Malacostraca	Amphipoda	Gammaridae	Gammarus	Arthropoda	F	H	15989	14924	-0.262	0.0664207	33.2	32	22	12.9	65.2	34.9	44.9	0.018	-0.261	-0.018	0.261	Gammarus_fossarum_NC_034937_1	0.0666083	5	3.388	Gammarus_fossarum_NC_034937	Gammarus_fossarum_NC_034937	double
3	NC_022472.1	Luciola cruciata	Luciola_cruciata_NC_022472_1	Insecta	Coleoptera	Lampyridae	Luciola	Arthropoda	F	H	15989	14454	-0.233	0.0104447	43.2	32.5	14.9	9.3	75.7	24.2	41.8	0.141	-0.232	-0.141	0.232	Luciola_cruciata_NC_022472_1	0.0960035	5	2.748	Luciola_cruciata_NC_022472	Luciola_cruciata_NC_022472	double
3	NC_012060.1	Penaeus stylirostris	Penaeus_stylirostris_NC_012060_1	Malacostraca	Decapoda	Penaeidae	Penaeus	Arthropoda	F	H	15988	14847	-0.202	0.00888166	33.8	34.8	18.9	12.6	68.6	31.5	47.4	-0.016	-0.201	0.016	0.201	Penaeus_stylirostris_NC_012060_1	0.071366	5	2.357	Penaeus_stylirostris_NC_012060	Penaeus_stylirostris_NC_012060	double
3	NC_060345.1	Rheocricotopus villiculus	Rheocricotopus_villiculus_NC_060345_1	Insecta	Diptera	Chironomidae	Rheocricotopus	Arthropoda	F	H	15985	14856	-0.172	0.0185799	39.3	38.3	13.2	9.2	77.6	22.4	47.5	0.014	-0.176	-0.014	0.176	Rheocricotopus_villiculus_NC_060345_1	0.0706287	5	2.428	Rheocricotopus_villiculus_NC_060345	Rheocricotopus_villiculus_NC_060345	double
3	NC_044962.1	Prismognathus prossi	Prismognathus_prossi_NC_044962_1	Insecta	Coleoptera	Lucanidae	Prismognathus	Arthropoda	F	H	15984	14508	-0.198	0.00212713	36.6	34.3	17.5	11.6	70.9	29.1	45.9	0.033	-0.204	-0.033	0.204	Prismognathus_prossi_NC_044962_1	0.0923423	5	2.597	Prismognathus_prossi_NC_044962	Prismognathus_prossi_NC_044962	double
6	NC_029395.1	Engaewa walpolea	Engaewa_walpolea_NC_029395_1	Malacostraca	Decapoda	Parastacidae	Engaewa	Arthropoda	F	H	15984	14708	-0.422	0.0798298	34.6	32.6	23.6	9.3	67.2	32.9	41.9	0.029	-0.436	-0.029	0.436	Engaewa_walpolea_NC_029395_1	0.0798298	5	2.877	Engaewa_walpolea_NC_029395	Engaewa_walpolea_NC_029395	double
3	NC_002184.1	Penaeus monodon	Penaeus_monodon_NC_002184_1	Malacostraca	Decapoda	Penaeidae	Penaeus	Arthropoda	F	H	15984	14854	-0.142	0.0086962	35.3	35.4	16.7	12.7	70.7	29.4	48.1	-0.001	-0.136	0.001	0.136	Penaeus_monodon_NC_002184_1	0.0706957	5	2.388	Penaeus_monodon_NC_002184	Penaeus_monodon_NC_002184	double
3	NC_023363.1	Rapisma zayuanum	Rapisma_zayuanum_NC_023363_1	Insecta	Neuroptera	Rapismatidae	Rapisma	Arthropoda	F	H	15984	14689	-0.175	0.00638138	37.8	43.3	11.2	7.7	81.1	18.9	51	-0.067	-0.185	0.067	0.185	Rapisma_zayuanum_NC_023363_1	0.0810185	5	2.54	Rapisma_zayuanum_NC_023363	Rapisma_zayuanum_NC_023363	double
3	NC_010969.1	Rhagophthalmus lufengensis	Rhagophthalmus_lufengensis_NC_010969_1	Insecta	Coleoptera	Rhagophthalmidae	Rhagophthalmus	Arthropoda	F	I	15982	14597	-0.19	0.08666	43.9	35.7	12.2	8.2	79.6	20.4	43.9	0.104	-0.196	-0.104	0.196	Rhagophthalmus_lufengensis_NC_010969_1	0.08666	5	2.707	Rhagophthalmus_lufengensis_NC_010969	Rhagophthalmus_lufengensis_NC_010969	double
4	NC_060869.1	Chelonus formosanus	Chelonus_formosanus_NC_060869_1	Insecta	Hymenoptera	Braconidae	Chelonus	Arthropoda	Parasitoid	H	15982	14591	0.149	0.075147	39.6	45.8	6.2	8.4	85.4	14.6	54.2	-0.073	0.152	0.073	-0.152	Chelonus_formosanus_NC_060869_1	0.0870354	5	4.626	Chelonus_formosanus_NC_060869	Chelonus_formosanus_NC_060869	double
3	NC_042759.1	Sarcophaga princeps	Sarcophaga_princeps_NC_042759_1	Insecta	Diptera	Sarcophagidae	Sarcophaga	Arthropoda	F	H	15981	14738	-0.211	0.00851011	39.8	36.4	14.5	9.3	76.2	23.8	45.7	0.044	-0.22	-0.044	0.22	Sarcophaga_princeps_NC_042759_1	0.0777799	5	2.445	Sarcophaga_princeps_NC_042759	Sarcophaga_princeps_NC_042759	double
3	NC_000857.1	Ceratitis capitata	Ceratitis_capitata_NC_000857_1	Insecta	Diptera	Tephritidae	Ceratitis	Arthropoda	F	H	15980	14756	-0.183	0.0137672	39.6	37.9	13.3	9.2	77.5	22.5	47.1	0.021	-0.185	-0.021	0.185	Ceratitis_capitata_NC_000857_1	0.0765957	5	2.397	Ceratitis_capitata_NC_000857	Ceratitis_capitata_NC_000857	double
3	NC_059809.1	Bambusicaliscelis fanjingensis	Bambusicaliscelis_fanjingensis_NC_059809_1	Insecta	Hemiptera	Caliscelidae	Bambusicaliscelis	Arthropoda	F	H	15979	14356	-0.282	0.0245948	48.1	32.2	12.6	7	80.3	19.6	39.2	0.197	-0.288	-0.197	0.288	Bambusicaliscelis_fanjingensis_NC_059809_1	0.101571	5	3.565	Bambusicaliscelis_fanjingensis_NC_059809	Bambusicaliscelis_fanjingensis_NC_059809	double
3	NC_053826.1	Pimelocerus perforatus	Pimelocerus_perforatus_NC_053826_1	Insecta	Coleoptera	Curculionidae	Pimelocerus	Arthropoda	F	H	15977	14554	-0.235	0.00475684	39.2	36.3	15.2	9.3	75.5	24.5	45.6	0.038	-0.238	-0.038	0.238	Pimelocerus_perforatus_NC_053826_1	0.0890655	5	2.913	Pimelocerus_perforatus_NC_053826	Pimelocerus_perforatus_NC_053826	double
3	NC_035412.1	Halocaridinides fowleri	Halocaridinides_fowleri_NC_035412_1	Malacostraca	Decapoda	Atyidae	Halocaridinides	Arthropoda	F	I	15977	14632	-0.284	0.0841835	34.7	29.6	22.8	12.8	64.3	35.6	42.4	0.079	-0.28	-0.079	0.28	Halocaridinides_fowleri_NC_035412_1	0.0841835	5	2.587	Halocaridinides_fowleri_NC_035412	Halocaridinides_fowleri_NC_035412	double
3	NC_029466.1	Bactrocera latifrons	Bactrocera_latifrons_NC_029466_1	Insecta	Diptera	Tephritidae	Bactrocera	Arthropoda	F	H	15977	14741	-0.267	0.017713	38.7	32.4	18.3	10.6	71.1	28.9	43	0.088	-0.266	-0.088	0.266	Bactrocera_latifrons_NC_029466_1	0.0773612	5	2.436	Bactrocera_latifrons_NC_029466	Bactrocera_latifrons_NC_029466	double
3	NC_037244.1	Altiverruca navicula	Altiverruca_navicula_NC_037244_1	Hexanauplia	Sessilia	Verrucidae	Altiverruca	Arthropoda	F	L	15976	14540	-0.239	0.0898848	38.2	34.4	17	10.4	72.6	27.4	44.8	0.052	-0.239	-0.052	0.239	Altiverruca_navicula_NC_037244_1	0.0898848	5	2.671	Altiverruca_navicula_NC_037244	Altiverruca_navicula_NC_037244	double
3	NC_012144.1	Hydroscapha granulum	Hydroscapha_granulum_NC_012144_1	Insecta	Coleoptera	Hydroscaphidae	Hydroscapha	Arthropoda	F	H	15975	14658	-0.157	0.0786854	39.8	37.5	13.1	9.6	77.3	22.7	47.1	0.03	-0.152	-0.03	0.152	Hydroscapha_granulum_NC_012144_1	0.174585	5	2.342	Hydroscapha_granulum_NC_012144	Hydroscapha_granulum_NC_012144	double
3	NC_012738.1	Penaeus californiensis	Penaeus_californiensis_NC_012738_1	Malacostraca	Decapoda	Penaeidae	Penaeus	Arthropoda	F	H	15975	16489	-0.201	0.012457	32.6	34.5	19.6	13.3	67.1	32.9	47.8	-0.028	-0.192	0.028	0.192	Penaeus_californiensis_NC_012738_1	0.0701095	5	2.361	Penaeus_californiensis_NC_012738	Penaeus_californiensis_NC_012738	double
3	NC_060839.1	Clogmia albipunctata	Clogmia_albipunctata_NC_060839_1	Insecta	Diptera	Psychodidae	Clogmia	Arthropoda	F	H	15974	14710	-0.183	0.0492676	39	39.2	13.3	8.6	78.2	21.9	47.8	-0.002	-0.212	0.002	0.212	Clogmia_albipunctata_NC_060839_1	0.0791286	5	2.556	Clogmia_albipunctata_NC_060839	Clogmia_albipunctata_NC_060839	double
3	NC_035684.1	Durgades nigropicta	Durgades_nigropicta_NC_035684_1	Insecta	Hemiptera	Cicadellidae	Durgades	Arthropoda	F	H	15974	14313	-0.178	0.00150244	44.9	33.9	12.3	8.9	78.8	21.2	42.8	0.139	-0.158	-0.139	0.158	Durgades_nigropicta_NC_035684_1	0.103981	5	3.21	Durgades_nigropicta_NC_035684	Durgades_nigropicta_NC_035684	double
3	NC_040139.1	Metapenaeopsis barbata	Metapenaeopsis_barbata_NC_040139_1	Malacostraca	Decapoda	Penaeidae	Metapenaeopsis	Arthropoda	F	H	15973	14799	-0.219	0.0729356	33.9	33.7	19.7	12.7	67.6	32.4	46.4	0.003	-0.214	-0.003	0.214	Metapenaeopsis_barbata_NC_040139_1	0.073499	5	2.35	Metapenaeopsis_barbata_NC_040139	Metapenaeopsis_barbata_NC_040139	double
3	NC_053743.1	Mattiphus splendidus	Mattiphus_splendidus_NC_053743_1	Insecta	Hemiptera	Tessaratomidae	Mattiphus	Arthropoda	F	H	15973	14550	-0.12	0.00413197	42.1	30.6	15.4	11.9	72.7	27.3	42.5	0.158	-0.129	-0.158	0.129	Mattiphus_splendidus_NC_053743_1	0.0890878	5	2.982	Mattiphus_splendidus_NC_053743	Mattiphus_splendidus_NC_053743	double
3	NC_040140.1	Penaeus latisulcatus	Penaeus_latisulcatus_NC_040140_1	Malacostraca	Decapoda	Penaeidae	Penaeus	Arthropoda	F	H	15971	14813	-0.188	0.0107069	31.2	33.6	20.8	14.4	64.8	35.2	48	-0.037	-0.182	0.037	0.182	Penaeus_latisulcatus_NC_040140_1	0.0725064	5	2.359	Penaeus_latisulcatus_NC_040140	Penaeus_latisulcatus_NC_040140	double
3	NC_012617.1	Geisha distinctissima	Geisha_distinctissima_NC_012617_1	Insecta	Hemiptera	Flatidae	Geisha	Arthropoda	F	H	15971	14218	-0.267	0.00319329	47.5	27.6	15.8	9.1	75.1	24.9	36.7	0.264	-0.266	-0.264	0.266	Geisha_distinctissima_NC_012617_1	0.109761	5	3.512	Geisha_distinctissima_NC_012617	Geisha_distinctissima_NC_012617	double
3	NC_037511.1	Incisitermes minor	Incisitermes_minor_NC_037511_1	Insecta	Blattodea	Kalotermitidae	Incisitermes	Arthropoda	F	H	15970	14711	-0.231	0.00632436	41.4	24.1	21.3	13.3	65.5	34.6	37.4	0.265	-0.232	-0.265	0.232	Incisitermes_minor_NC_037511_1	0.0788353	5	2.58	Incisitermes_minor_NC_037511	Incisitermes_minor_NC_037511	double
3	NC_042441.1	Antilochus coquebertii	Antilochus_coquebertii_NC_042441_1	Insecta	Hemiptera	Pyrrhocoridae	Antilochus	Arthropoda	F	H	15970	14535	-0.234	0.00776456	43.2	28.9	17.4	10.5	72.1	27.9	39.4	0.198	-0.245	-0.198	0.245	Antilochus_coquebertii_NC_042441_1	0.089856	5	3.103	Antilochus_coquebertii_NC_042441	Antilochus_coquebertii_NC_042441	double
4	NC_007010.1	Penaeus japonicus	Penaeus_japonicus_NC_007010_1	Malacostraca	Decapoda	Penaeidae	Penaeus	Arthropoda	F	H	15968	14851	-0.222	0.00782816	32.6	33.8	20.4	13.2	66.4	33.6	47	-0.018	-0.215	0.018	0.215	Penaeus_japonicus_NC_007010_1	0.0699524	5	2.355	Penaeus_japonicus_NC_007010	Penaeus_japonicus_NC_007010	double
5	NC_050695.1	Trachypenaeus curvirostris	Trachypenaeus_curvirostris_NC_050695_1	Malacostraca	Decapoda	Penaeidae	Trachypenaeus	Arthropoda	F	H	15968	14850	-0.271	0.0067009	35.2	33.5	19.8	11.5	68.7	31.3	45	0.024	-0.264	-0.024	0.264	Trachypenaeus_curvirostris_NC_050695_1	0.070015	5	2.396	Trachypenaeus_curvirostris_NC_050695	Trachypenaeus_curvirostris_NC_050695	double
3	NC_057102.1	Analcellicampa danfengensis	Analcellicampa_danfengensis_NC_057102_1	Insecta	Hymenoptera	Tenthredinidae	Analcellicampa	Arthropoda	F	H	15968	14893	-0.199	0.0673221	43.1	37.8	11.5	7.6	80.9	19.1	45.4	0.066	-0.203	-0.066	0.203	Analcellicampa_danfengensis_NC_057102_1	0.0673221	5	2.792	Analcellicampa_danfengensis_NC_057102	Analcellicampa_danfengensis_NC_057102	double
3	NC_032062.1	Asymmetricata circumdata	Asymmetricata_circumdata_NC_032062_1	Insecta	Coleoptera	Lampyridae	Asymmetricata	Arthropoda	F	H	15967	14483	-0.176	0.0060124	42.2	36.2	12.8	8.8	78.4	21.6	45	0.077	-0.187	-0.077	0.187	Asymmetricata_circumdata_NC_032062_1	0.0929417	5	2.718	Asymmetricata_circumdata_NC_032062	Asymmetricata_circumdata_NC_032062	double
3	NC_027601.1	Palaemon serenus	Palaemon_serenus_NC_027601_1	Malacostraca	Decapoda	Palaemonidae	Palaemon	Arthropoda	F	H	15967	14685	-0.179	0.0799148	29.2	29.8	24.1	16.9	59	41	46.7	-0.01	-0.177	0.01	0.177	Palaemon_serenus_NC_027601_1	0.080228	5	2.658	Palaemon_serenus_NC_027601	Palaemon_serenus_NC_027601	double
3	NC_042909.1	Eristalinus vicarians	Eristalinus_vicarians_NC_042909_1	Insecta	Diptera	Syrphidae	Eristalinus	Arthropoda	F	H	15966	14740	-0.172	0.0156583	41.1	38.9	11.8	8.2	80	20	47.1	0.027	-0.176	-0.027	0.176	Eristalinus_vicarians_NC_042909_1	0.0767882	5	2.442	Eristalinus_vicarians_NC_042909	Eristalinus_vicarians_NC_042909	double
3	NC_034288.1	Macrotermes yunnanensis	Macrotermes_yunnanensis_NC_034288_1	Insecta	Blattodea	Termitidae	Macrotermes	Arthropoda	F	H	15965	14880	-0.325	0.00820545	44.7	22	22.1	11.2	66.7	33.3	33.2	0.341	-0.328	-0.341	0.328	Macrotermes_yunnanensis_NC_034288_1	0.0679612	5	2.764	Macrotermes_yunnanensis_NC_034288	Macrotermes_yunnanensis_NC_034288	double
3	NC_057489.1	Monolepta hieroglyphica	Monolepta_hieroglyphica_NC_057489_1	Insecta	Coleoptera	Chrysomelidae	Monolepta	Arthropoda	F	H	15963	14526	-0.158	0.00169141	41.1	39.2	11.6	8.1	80.3	19.7	47.3	0.024	-0.177	-0.024	0.177	Monolepta_hieroglyphica_NC_057489_1	0.0900207	5	2.686	Monolepta_hieroglyphica_NC_057489	Monolepta_hieroglyphica_NC_057489	double
3	NC_050327.1	Triatoma mazzottii	Triatoma_mazzottii_NC_050327_1	Insecta	Hemiptera	Reduviidae	Triatoma	Arthropoda	MP	H	15962	14215	-0.257	0.0913419	40.3	29.7	19	11	70	30	40.7	0.153	-0.268	-0.153	0.268	Triatoma_mazzottii_NC_050327_1	0.174477	5	2.876	Triatoma_mazzottii_NC_050327	Triatoma_mazzottii_NC_050327	double
8	NC_039534.1	Trichogramma japonicum	Trichogramma_japonicum_NC_039534_1	Insecta	Hymenoptera	Trichogrammatidae	Trichogramma	Arthropoda	Parasitoid	I	15962	14663	0.157	0.080441	36.9	48	6.4	8.7	84.9	15.1	56.7	-0.131	0.157	0.131	-0.157	Trichogramma_japonicum_NC_039534_1	0.0813808	5	4.216	Trichogramma_japonicum_NC_039534	Trichogramma_japonicum_NC_039534	double
3	NC_039687.1	Plutella australiana	Plutella_australiana_NC_039687_1	Insecta	Lepidoptera	Plutellidae	Plutella	Arthropoda	F	H	15962	14786	-0.181	0.0499937	40.9	39.8	11.5	7.9	80.7	19.4	47.7	0.014	-0.185	-0.014	0.185	Plutella_australiana_NC_039687_1	0.073675	5	2.49	Plutella_australiana_NC_039687	Plutella_australiana_NC_039687	double
3	NC_031824.1	Ischnura elegans	Ischnura_elegans_NC_031824_1	Insecta	Odonata	Coenagrionidae	Ischnura	Arthropoda	F	H	15962	14675	-0.083	0.00570104	40.3	32.5	14.8	12.3	72.8	27.1	44.8	0.107	-0.093	-0.107	0.093	Ischnura_elegans_NC_031824_1	0.080629	5	2.517	Ischnura_elegans_NC_031824	Ischnura_elegans_NC_031824	double
3	NC_020143.1	Sirthenea flavipes	Sirthenea_flavipes_NC_020143_1	Insecta	Hemiptera	Reduviidae	Sirthenea	Arthropoda	F	H	15961	14532	-0.159	0.00557609	41.8	30	16.4	11.9	71.8	28.3	41.9	0.165	-0.16	-0.165	0.16	Sirthenea_flavipes_NC_020143_1	0.0895307	5	2.888	Sirthenea_flavipes_NC_020143	Sirthenea_flavipes_NC_020143	double
3	NC_023362.1	Rapisma xizangense	Rapisma_xizangense_NC_023362_1	Insecta	Neuroptera	Rapismatidae	Rapisma	Arthropoda	F	H	15961	14668	-0.174	0.00789424	37.8	43.3	11.2	7.7	81.1	18.9	51	-0.067	-0.184	0.067	0.184	Rapisma_xizangense_NC_023362_1	0.08101	5	2.541	Rapisma_xizangense_NC_023362	Rapisma_xizangense_NC_023362	double
3	NC_050686.1	Taku spinosocarinatus	Taku_spinosocarinatus_NC_050686_1	Malacostraca	Stomatopoda	Takuidae	Taku	Arthropoda	F	H	15960	14792	-0.186	0.072995	34.2	32.6	19.8	13.4	66.8	33.2	46	0.025	-0.19	-0.025	0.19	Taku_spinosocarinatus_NC_050686_1	0.073183	5	2.455	Taku_spinosocarinatus_NC_050686	Taku_spinosocarinatus_NC_050686	double
3	NC_060595.1	Erebus caprimulgus	Erebus_caprimulgus_NC_060595_1	Insecta	Lepidoptera	Erebidae	Erebus	Arthropoda	F	H	15958	14743	-0.223	0.0506956	39.2	41.9	11.6	7.3	81.1	18.9	49.2	-0.033	-0.227	0.033	0.227	Erebus_caprimulgus_NC_060595_1	0.0761374	5	2.611	Erebus_caprimulgus_NC_060595	Erebus_caprimulgus_NC_060595	double
3	NC_045090.1	Palaemon sinensis	Palaemon_sinensis_NC_045090_1	Malacostraca	Decapoda	Palaemonidae	Palaemon	Arthropoda	F	H	15955	14669	-0.276	0.080351	36.2	30.5	21.3	12.1	66.7	33.4	42.6	0.085	-0.276	-0.085	0.276	Palaemon_sinensis_NC_045090_1	0.0806017	5	2.597	Palaemon_sinensis_NC_045090	Palaemon_sinensis_NC_045090	double
3	NC_026466.1	Balanus balanus	Balanus_balanus_NC_026466_1	Hexanauplia	Sessilia	Balanidae	Balanus	Arthropoda	F	L	15955	14600	-0.148	0.0847383	35.3	34	17.7	13.1	69.3	30.8	47.1	0.019	-0.149	-0.019	0.149	Balanus_balanus_NC_026466_1	0.0849264	5	2.61	Balanus_balanus_NC_026466	Balanus_balanus_NC_026466	double
3	NC_028056.1	Lucilia illustris	Lucilia_illustris_NC_028056_1	Insecta	Diptera	Calliphoridae	Lucilia	Arthropoda	F	H	15954	14682	-0.163	0.0797292	39.3	38	13.2	9.3	77.3	22.5	47.3	0.017	-0.171	-0.017	0.171	Lucilia_illustris_NC_028056_1	0.0797292	5	2.434	Lucilia_illustris_NC_028056	Lucilia_illustris_NC_028056	double
3	NC_028057.1	Lucilia caesar	Lucilia_caesar_NC_028057_1	Insecta	Diptera	Calliphoridae	Lucilia	Arthropoda	F	H	15954	14704	-0.168	0.0783503	39.3	37.9	13.3	9.4	77.2	22.7	47.3	0.018	-0.172	-0.018	0.172	Lucilia_caesar_NC_028057_1	0.0783503	5	2.429	Lucilia_caesar_NC_028057	Lucilia_caesar_NC_028057	double
3	NC_029467.1	Bactrocera melastomatos	Bactrocera_melastomatos_NC_029467_1	Insecta	Diptera	Tephritidae	Bactrocera	Arthropoda	F	H	15954	14740	-0.249	0.0163595	39.6	34.2	16.4	9.8	73.8	26.2	44	0.073	-0.251	-0.073	0.251	Bactrocera_melastomatos_NC_029467_1	0.0760938	5	2.429	Bactrocera_melastomatos_NC_029467	Bactrocera_melastomatos_NC_029467	double
3	NC_036011.1	Phymata americana	Phymata_americana_NC_036011_1	Insecta	Hemiptera	Phymatidae	Phymata	Arthropoda	F	H	15954	14422	-0.147	0.00413689	41.1	31.4	16	11.5	72.5	27.5	42.9	0.134	-0.162	-0.134	0.162	Phymata_americana_NC_036011_1	0.0959007	5	2.856	Phymata_americana_NC_036011	Phymata_americana_NC_036011	double
4	NC_058228.1	Anisopteromalus calandrae	Anisopteromalus_calandrae_NC_058228_1	Insecta	Hymenoptera	Pteromalidae	Anisopteromalus	Arthropoda	Parasitoid	H	15954	14076	0.219	0.116523	39.8	43.1	6.5	10.6	82.9	17.1	53.7	-0.039	0.236	0.039	-0.236	Anisopteromalus_calandrae_NC_058228_1	0.117713	5	4.093	Anisopteromalus_calandrae_NC_058228	Anisopteromalus_calandrae_NC_058228	double
3	NC_034929.1	Labiotermes labralis	Labiotermes_labralis_NC_034929_1	Insecta	Blattodea	Termitidae	Labiotermes	Arthropoda	F	H	15953	14625	-0.247	0.0584216	42.9	26.5	19.2	11.4	69.4	30.6	37.9	0.237	-0.254	-0.237	0.254	Labiotermes_labralis_NC_034929_1	0.0832445	5	2.74	Labiotermes_labralis_NC_034929	Labiotermes_labralis_NC_034929	double
3	NC_038069.1	Parapenaeopsis hungerfordi	Parapenaeopsis_hungerfordi_NC_038069_1	Malacostraca	Decapoda	Penaeidae	Parapenaeopsis	Arthropoda	F	H	15952	14763	-0.331	0.00883902	34.5	30.1	23.4	12	64.6	35.4	42.1	0.068	-0.324	-0.068	0.324	Parapenaeopsis_hungerfordi_NC_038069_1	0.0745361	5	2.424	Parapenaeopsis_hungerfordi_NC_038069	Parapenaeopsis_hungerfordi_NC_038069	double
3	NC_019573.1	Lucilia cuprina	Lucilia_cuprina_NC_019573_1	Insecta	Diptera	Calliphoridae	Lucilia	Arthropoda	F	H	15952	14730	-0.163	0.00539117	39.5	38.1	13	9.3	77.6	22.3	47.4	0.018	-0.164	-0.018	0.164	Lucilia_cuprina_NC_019573_1	0.0766048	5	2.43	Lucilia_cuprina_NC_019573	Lucilia_cuprina_NC_019573	double
3	NC_037724.1	Dinorhynchus dybowskyi	Dinorhynchus_dybowskyi_NC_037724_1	Insecta	Hemiptera	Pentatomidae	Dinorhynchus	Arthropoda	F	H	15952	14449	-0.116	0.0132899	41.3	33.8	14.1	10.8	75.1	24.9	44.6	0.101	-0.13	-0.101	0.13	Dinorhynchus_dybowskyi_NC_037724_1	0.0942202	5	3.101	Dinorhynchus_dybowskyi_NC_037724	Dinorhynchus_dybowskyi_NC_037724	double
3	NC_042803.1	Cantao ocellatus	Cantao_ocellatus_NC_042803_1	Insecta	Hemiptera	Scutelleridae	Cantao	Arthropoda	F	H	15952	14514	-0.141	0.0157347	41	33.2	14.8	11	74.2	25.8	44.2	0.105	-0.147	-0.105	0.147	Cantao_ocellatus_NC_042803_1	0.0901454	5	3.072	Cantao_ocellatus_NC_042803	Cantao_ocellatus_NC_042803	double
3	NC_049031.1	Linuparus trigonus	Linuparus_trigonus_NC_049031_1	Malacostraca	Decapoda	Palinuridae	Linuparus	Arthropoda	F	H	15949	14723	-0.292	0.0758668	32.8	32.6	22.6	12	65.4	34.6	44.6	0.003	-0.305	-0.003	0.305	Linuparus_trigonus_NC_049031_1	0.07687	5	2.602	Linuparus_trigonus_NC_049031	Linuparus_trigonus_NC_049031	double
3	NC_025329.1	Hemiodoecus leai	Hemiodoecus_leai_NC_025329_1	Insecta	Hemiptera	Peloridiidae	Hemiodoecus	Arthropoda	F	H	15949	14486	-0.316	0.00307229	39.7	28.8	20.8	10.8	68.5	31.6	39.6	0.159	-0.315	-0.159	0.315	Hemiodoecus_leai_NC_025329_1	0.0917299	5	3.833	Hemiodoecus_leai_NC_025329	Hemiodoecus_leai_NC_025329	double
3	NC_033996.1	Lipotactes tripyrga	Lipotactes_tripyrga_NC_033996_1	Insecta	Orthoptera	Tettigoniidae	Lipotactes	Arthropoda	F	H	15949	14824	-0.317	0.0132297	37.2	35	18.3	9.5	72.2	27.8	44.5	0.03	-0.315	-0.03	0.315	Lipotactes_tripyrga_NC_033996_1	0.0705373	5	2.625	Lipotactes_tripyrga_NC_033996	Lipotactes_tripyrga_NC_033996	double
3	NC_022816.1	Oncocephalus breviscutum	Oncocephalus_breviscutum_NC_022816_1	Insecta	Hemiptera	Reduviidae	Oncocephalus	Arthropoda	F	H	15948	14497	-0.166	0.0066466	42.1	32.3	14.9	10.7	74.4	25.6	43	0.133	-0.165	-0.133	0.165	Oncocephalus_breviscutum_NC_022816_1	0.0909832	5	2.834	Oncocephalus_breviscutum_NC_022816	Oncocephalus_breviscutum_NC_022816	double
3	NC_046550.1	Sphingonotus menglaensis	Sphingonotus_menglaensis_NC_046550_1	Insecta	Orthoptera	Acrididae	Sphingonotus	Arthropoda	F	H	15948	14779	-0.2	0.00551793	44.4	30.4	15.1	10.1	74.8	25.2	40.5	0.187	-0.2	-0.187	0.2	Sphingonotus_menglaensis_NC_046550_1	0.0733007	5	2.634	Sphingonotus_menglaensis_NC_046550	Sphingonotus_menglaensis_NC_046550	double
3	NC_012689.1	Orussus occidentalis	Orussus_occidentalis_NC_012689_1	Insecta	Hymenoptera	Orussidae	Orussus	Arthropoda	Parasitoid	H	15947	14757	-0.314	0.00796388	38.8	37.5	15.6	8.2	76.3	23.8	45.7	0.017	-0.308	-0.017	0.308	Orussus_occidentalis_NC_012689_1	0.0746222	5	4.114	Orussus_occidentalis_NC_012689	Orussus_occidentalis_NC_012689	double
3	NC_036277.1	Pelecotoma fennica	Pelecotoma_fennica_NC_036277_1	Insecta	Coleoptera	Ripiphoridae	Pelecotoma	Arthropoda	F	H	15946	14293	-0.349	0.0726201	38.3	35.1	18	8.4	73.4	26.4	43.5	0.044	-0.364	-0.044	0.364	Pelecotoma_fennica_NC_036277_1	0.103662	5	2.839	Pelecotoma_fennica_NC_036277	Pelecotoma_fennica_NC_036277	double
3	NC_030280.1	Solenocera crassicornis	Solenocera_crassicornis_NC_030280_1	Malacostraca	Decapoda	Solenoceridae	Solenocera	Arthropoda	F	H	15946	14836	-0.312	0.00658472	35.7	32	21.2	11.1	67.7	32.3	43.1	0.054	-0.311	-0.054	0.311	Solenocera_crassicornis_NC_030280_1	0.0696099	5	2.417	Solenocera_crassicornis_NC_030280	Solenocera_crassicornis_NC_030280	double
3	NC_021382.1	Artemia urmiana	Artemia_urmiana_NC_021382_1	Branchiopoda	Anostraca	Artemiidae	Artemia	Arthropoda	F	H	15945	13790	-0.088	0.0139856	30.9	31.5	20.1	17.4	62.4	37.5	48.9	-0.009	-0.072	0.009	0.072	Artemia_urmiana_NC_021382_1	0.135152	5	3.232	Artemia_urmiana_NC_021382	Artemia_urmiana_NC_021382	double
3	NC_009733.1	Lucilia sericata	Lucilia_sericata_NC_009733_1	Insecta	Diptera	Calliphoridae	Lucilia	Arthropoda	F	H	15945	14729	-0.165	0.0761367	39.4	38.2	13	9.3	77.6	22.3	47.5	0.016	-0.167	-0.016	0.167	Lucilia_sericata_NC_009733_1	0.0762622	5	2.425	Lucilia_sericata_NC_009733	Lucilia_sericata_NC_009733	double
3	NC_026834.1	Metapenaeus ensis	Metapenaeus_ensis_NC_026834_1	Malacostraca	Decapoda	Penaeidae	Metapenaeus	Arthropoda	F	H	15944	14806	-0.268	0.00859257	34.8	30.9	21.7	12.6	65.7	34.3	43.5	0.06	-0.267	-0.06	0.267	Metapenaeus_ensis_NC_026834_1	0.0713748	5	2.352	Metapenaeus_ensis_NC_026834	Metapenaeus_ensis_NC_026834	double
3	NC_020774.1	Lentula callani	Lentula_callani_NC_020774_1	Insecta	Orthoptera	Lentulidae	Lentula	Arthropoda	F	H	15944	14757	-0.164	0.0048294	43.8	32.2	13.8	10.1	76	23.9	42.3	0.153	-0.153	-0.153	0.153	Lentula_callani_NC_020774_1	0.0744481	5	2.761	Lentula_callani_NC_020774	Lentula_callani_NC_020774	double
3	NC_054321.1	Ochlerotatus nigrithorax	Ochlerotatus_nigrithorax_NC_054321_1	Insecta	Diptera	Culicidae	Ochlerotatus	Arthropoda	MP	H	15943	14803	-0.161	0.00520605	39.9	38.9	12.3	8.9	78.8	21.2	47.8	0.012	-0.164	-0.012	0.164	Ochlerotatus_nigrithorax_NC_054321_1	0.0715047	5	2.473	Ochlerotatus_nigrithorax_NC_054321	Ochlerotatus_nigrithorax_NC_054321	double
3	NC_028076.1	Kamimuria chungnanshana	Kamimuria_chungnanshana_NC_028076_1	Insecta	Plecoptera	Perlidae	Kamimuria	Arthropoda	F	H	15943	14842	-0.246	0.00250894	35.6	34	19	11.4	69.6	30.4	45.4	0.023	-0.248	-0.023	0.248	Kamimuria_chungnanshana_NC_028076_1	0.0690585	5	2.409	Kamimuria_chungnanshana_NC_028076	Kamimuria_chungnanshana_NC_028076	double
3	NC_030758.1	Agrilus planipennis	Agrilus_planipennis_NC_030758_1	Insecta	Coleoptera	Buprestidae	Agrilus	Arthropoda	F	H	15942	14593	-0.228	0.0846192	40.3	31.6	17.4	10.7	71.9	28.1	42.3	0.12	-0.238	-0.12	0.238	Agrilus_planipennis_NC_030758_1	0.0846192	5	2.566	Agrilus_planipennis_NC_030758	Agrilus_planipennis_NC_030758	double
4	NC_028447.1	Procambarus alleni	Procambarus_alleni_NC_028447_1	Malacostraca	Decapoda	Cambaridae	Procambarus	Arthropoda	F	H	15942	14606	0.301	0.0831765	29.3	38.6	9.1	16.8	67.9	25.9	55.4	-0.137	0.298	0.137	-0.298	Procambarus_alleni_NC_028447_1	0.0838038	5	2.781	Procambarus_alleni_NC_028447	Procambarus_alleni_NC_028447	double
4	NC_051486.1	Monomorium pharaonis	Monomorium_pharaonis_NC_051486_1	Insecta	Hymenoptera	Formicidae	Monomorium	Arthropoda	F	H	15942	14578	-0.408	0.0849956	41	38.7	14.5	5.8	79.7	20.3	44.5	0.029	-0.425	-0.029	0.425	Monomorium_pharaonis_NC_051486_1	0.0855602	5	4.169	Monomorium_pharaonis_NC_051486	Monomorium_pharaonis_NC_051486	double
3	NC_051490.1	Pliacanthopus bimaculatus	Pliacanthopus_bimaculatus_NC_051490_1	Insecta	Mantodea	Nanomantidae	Pliacanthopus	Arthropoda	F	H	15941	14677	-0.228	0.00583401	37.6	35.5	16.5	10.3	73.1	26.8	45.8	0.028	-0.231	-0.028	0.231	Pliacanthopus_bimaculatus_NC_051490_1	0.0792924	5	2.769	Pliacanthopus_bimaculatus_NC_051490	Pliacanthopus_bimaculatus_NC_051490	double
3	NC_018599.1	Macrotermes barneyi	Macrotermes_barneyi_NC_018599_1	Insecta	Blattodea	Termitidae	Macrotermes	Arthropoda	F	H	15940	14885	-0.327	0.00771644	44.8	22	22	11.1	66.8	33.1	33.1	0.341	-0.33	-0.341	0.33	Macrotermes_barneyi_NC_018599_1	0.0661857	5	2.784	Macrotermes_barneyi_NC_018599	Macrotermes_barneyi_NC_018599	double
3	NC_057632.1	Sinopoppia nigroflagella	Sinopoppia_nigroflagella_NC_057632_1	Insecta	Hymenoptera	Tenthredinidae	Sinopoppia	Arthropoda	F	H	15940	14966	-0.209	0.05	43	37.3	11.9	7.7	80.3	19.6	45	0.072	-0.214	-0.072	0.214	Sinopoppia_nigroflagella_NC_057632_1	0.0611041	5	2.886	Sinopoppia_nigroflagella_NC_057632	Sinopoppia_nigroflagella_NC_057632	double
3	NC_026903.1	Thitarodes gonggaensis	Thitarodes_gonggaensis_NC_026903_1	Insecta	Lepidoptera	Hepialidae	Thitarodes	Arthropoda	F	H	15940	14757	-0.207	0.00307403	41.1	40.2	11.2	7.4	81.3	18.6	47.6	0.011	-0.2	-0.011	0.2	Thitarodes_gonggaensis_NC_026903_1	0.0742158	5	2.47	Thitarodes_gonggaensis_NC_026903	Thitarodes_gonggaensis_NC_026903	double
3	NC_040855.1	Heterocarpus ensifer	Heterocarpus_ensifer_NC_040855_1	Malacostraca	Decapoda	Pandalidae	Heterocarpus	Arthropoda	F	H	15939	14751	-0.259	0.0745342	34.9	29.9	22.1	13.1	64.8	35.2	43	0.077	-0.256	-0.077	0.256	Heterocarpus_ensifer_NC_040855_1	0.0745342	5	2.417	Heterocarpus_ensifer_NC_040855	Heterocarpus_ensifer_NC_040855	double
3	NC_029457.1	Metapenaeopsis dalei	Metapenaeopsis_dalei_NC_029457_1	Malacostraca	Decapoda	Penaeidae	Metapenaeopsis	Arthropoda	F	H	15939	14828	-0.21	0.0692013	33.9	34	19.3	12.7	67.9	32	46.7	-0.001	-0.206	0.001	0.206	Metapenaeopsis_dalei_NC_029457_1	0.0697032	5	2.358	Metapenaeopsis_dalei_NC_029457	Metapenaeopsis_dalei_NC_029457	double
3	NC_042804.1	Catacanthus incarnatus	Catacanthus_incarnatus_NC_042804_1	Insecta	Hemiptera	Pentatomidae	Catacanthus	Arthropoda	F	H	15939	14615	-0.178	0.00652488	43.8	32.8	13.9	9.4	76.6	23.3	42.2	0.143	-0.19	-0.143	0.19	Catacanthus_incarnatus_NC_042804_1	0.0830667	5	3.061	Catacanthus_incarnatus_NC_042804	Catacanthus_incarnatus_NC_042804	double
3	NC_042817.1	Cazira horvathi	Cazira_horvathi_NC_042817_1	Insecta	Hemiptera	Pentatomidae	Cazira	Arthropoda	F	H	15939	14553	-0.125	0.0112931	41.6	35.4	12.8	10.2	77	23	45.6	0.081	-0.117	-0.081	0.117	Cazira_horvathi_NC_042817_1	0.0869565	5	3.11	Cazira_horvathi_NC_042817	Cazira_horvathi_NC_042817	double
3	NC_019638.1	Hemipyrellia ligurriens	Hemipyrellia_ligurriens_NC_019638_1	Insecta	Diptera	Calliphoridae	Hemipyrellia	Arthropoda	F	H	15938	14739	-0.17	0.00501945	39.5	37.8	13.3	9.3	77.3	22.6	47.1	0.022	-0.178	-0.022	0.178	Hemipyrellia_ligurriens_NC_019638_1	0.075229	5	2.426	Hemipyrellia_ligurriens_NC_019638	Hemipyrellia_ligurriens_NC_019638	double
3	NC_032298.1	Bullanga florida	Bullanga_florida_NC_032298_1	Insecta	Neuroptera	Myrmeleontidae	Bullanga	Arthropoda	F	H	15937	14721	-0.183	0.00941206	38.8	34.5	15.8	10.9	73.3	26.7	45.4	0.058	-0.181	-0.058	0.181	Bullanga_florida_NC_032298_1	0.0763004	5	2.433	Bullanga_florida_NC_032298	Bullanga_florida_NC_032298	double
3	NC_039154.1	Aristeus virilis	Aristeus_virilis_NC_039154_1	Malacostraca	Decapoda	Aristeidae	Aristeus	Arthropoda	F	H	15936	14825	-0.239	0.0694654	33.1	31.5	21.9	13.5	64.6	35.4	45	0.024	-0.235	-0.024	0.235	Aristeus_virilis_NC_039154_1	0.0697164	5	2.395	Aristeus_virilis_NC_039154	Aristeus_virilis_NC_039154	double
3	NC_018787.1	Bactrocera correcta	Bactrocera_correcta_NC_018787_1	Insecta	Diptera	Tephritidae	Bactrocera	Arthropoda	F	H	15936	14744	-0.224	0.0152485	38.9	34.3	16.4	10.4	73.2	26.8	44.7	0.063	-0.222	-0.063	0.222	Bactrocera_correcta_NC_018787_1	0.0747992	5	2.411	Bactrocera_correcta_NC_018787	Bactrocera_correcta_NC_018787	double
3	NC_035828.1	Chlorotocus crassicornis	Chlorotocus_crassicornis_NC_035828_1	Malacostraca	Decapoda	Pandalidae	Chlorotocus	Arthropoda	F	H	15935	14757	-0.216	0.0739253	33.7	29.7	22.2	14.3	63.4	36.5	44	0.064	-0.217	-0.064	0.217	Chlorotocus_crassicornis_NC_035828_1	0.0739253	5	2.461	Chlorotocus_crassicornis_NC_035828	Chlorotocus_crassicornis_NC_035828	double
3	NC_027725.1	Bactrocera zonata	Bactrocera_zonata_NC_027725_1	Insecta	Diptera	Tephritidae	Bactrocera	Arthropoda	F	H	15935	14746	-0.222	0.0149984	39.1	34.3	16.3	10.4	73.4	26.7	44.7	0.065	-0.223	-0.065	0.223	Bactrocera_zonata_NC_027725_1	0.0746156	5	2.411	Bactrocera_zonata_NC_027725	Bactrocera_zonata_NC_027725	double
3	NC_042429.1	Adrisa magna	Adrisa_magna_NC_042429_1	Insecta	Hemiptera	Cydnidae	Adrisa	Arthropoda	F	H	15935	14643	-0.21	0.0107311	40.5	30.4	17.7	11.4	70.9	29.1	41.8	0.142	-0.217	-0.142	0.217	Adrisa_magna_NC_042429_1	0.0810794	5	2.903	Adrisa_magna_NC_042429	Adrisa_magna_NC_042429	double
6	NC_022847.1	Engaeus lengana	Engaeus_lengana_NC_022847_1	Malacostraca	Decapoda	Parastacidae	Engaeus	Arthropoda	F	H	15934	14693	-0.352	0.077821	33.3	33	22.8	10.9	66.3	33.7	43.9	0.005	-0.354	-0.005	0.354	Engaeus_lengana_NC_022847_1	0.0778838	5	2.831	Engaeus_lengana_NC_022847	Engaeus_lengana_NC_022847	double
3	NC_040119.1	Roisinitermes ebogoensis	Roisinitermes_ebogoensis_NC_040119_1	Insecta	Blattodea	Kalotermitidae	Roisinitermes	Arthropoda	F	H	15933	14599	-0.29	0.0136823	41.5	25.3	21.5	11.7	66.8	33.2	37	0.243	-0.296	-0.243	0.296	Roisinitermes_ebogoensis_NC_040119_1	0.0837256	5	2.617	Roisinitermes_ebogoensis_NC_040119	Roisinitermes_ebogoensis_NC_040119	double
3	NC_026292.1	Muscina stabulans	Muscina_stabulans_NC_026292_1	Insecta	Diptera	Muscidae	Muscina	Arthropoda	F	H	15933	14762	-0.204	0.014561	40.1	37.9	13.3	8.7	78	22	46.6	0.028	-0.209	-0.028	0.209	Muscina_stabulans_NC_026292_1	0.0734953	5	2.497	Muscina_stabulans_NC_026292	Muscina_stabulans_NC_026292	double
3	NC_018754.1	Acleris fimbriana	Acleris_fimbriana_NC_018754_1	Insecta	Lepidoptera	Tortricidae	Acleris	Arthropoda	F	H	15933	14801	-0.166	0.0200841	40	41	11.1	7.9	81	19	48.9	-0.012	-0.169	0.012	0.169	Acleris_fimbriana_NC_018754_1	0.0710475	5	2.532	Acleris_fimbriana_NC_018754	Acleris_fimbriana_NC_018754	double
3	NC_046535.1	Bryodema nigroptera	Bryodema_nigroptera_NC_046535_1	Insecta	Orthoptera	Acrididae	Bryodema	Arthropoda	F	H	15933	14802	-0.185	0.00426787	43.9	31.5	14.6	10	75.4	24.6	41.5	0.164	-0.185	-0.164	0.185	Bryodema_nigroptera_NC_046535_1	0.0709847	5	2.682	Bryodema_nigroptera_NC_046535	Bryodema_nigroptera_NC_046535	double
3	NC_026672.1	Peirates lepturoides	Peirates_lepturoides_NC_026672_1	Insecta	Hemiptera	Reduviidae	Peirates	Arthropoda	F	H	15932	14568	-0.153	0.00633944	40.9	31.5	16	11.6	72.4	27.6	43.1	0.13	-0.158	-0.13	0.158	Peirates_lepturoides_NC_026672_1	0.0856139	5	2.895	Peirates_lepturoides_NC_026672	Peirates_lepturoides_NC_026672	double
3	NC_035420.1	Pteranabropsis carli	Pteranabropsis_carli_NC_035420_1	Insecta	Orthoptera	Anostostomatidae	Pteranabropsis	Arthropoda	F	H	15932	14792	-0.193	0.00859905	39.2	36.2	14.7	9.9	75.4	24.6	46.1	0.04	-0.198	-0.04	0.198	Pteranabropsis_carli_NC_035420_1	0.0715541	5	2.271	Pteranabropsis_carli_NC_035420	Pteranabropsis_carli_NC_035420	double
3	NC_023921.1	Mekongiella kingdoni	Mekongiella_kingdoni_NC_023921_1	Insecta	Orthoptera	Pyrgomorphidae	Mekongiella	Arthropoda	F	H	15932	14778	-0.209	0.00571177	42.4	30.7	16.3	10.6	73.1	26.9	41.3	0.161	-0.213	-0.161	0.213	Mekongiella_kingdoni_NC_023921_1	0.0724328	5	2.656	Mekongiella_kingdoni_NC_023921	Mekongiella_kingdoni_NC_023921	double
3	NC_046768.1	Dolichosciara megumiae	Dolichosciara_megumiae_NC_046768_1	Insecta	Diptera	Sciaridae	Dolichosciara	Arthropoda	F	H	15931	14866	-0.143	0.0388551	39.5	37.9	12.9	9.7	77.4	22.6	47.6	0.021	-0.138	-0.021	0.138	Dolichosciara_megumiae_NC_046768_1	0.0668508	5	2.552	Dolichosciara_megumiae_NC_046768	Dolichosciara_megumiae_NC_046768	double
3	NC_025558.1	Angaracris barabensis	Angaracris_barabensis_NC_025558_1	Insecta	Orthoptera	Acrididae	Angaracris	Arthropoda	F	H	15930	14724	-0.175	0.0084118	43.8	31.7	14.4	10.1	75.5	24.5	41.8	0.16	-0.174	-0.16	0.174	Angaracris_barabensis_NC_025558_1	0.0757062	5	2.708	Angaracris_barabensis_NC_025558	Angaracris_barabensis_NC_025558	double
3	NC_025946.1	Angaracris rhodopa	Angaracris_rhodopa_NC_025946_1	Insecta	Orthoptera	Acrididae	Angaracris	Arthropoda	F	H	15930	14724	-0.173	0.0084118	43.8	31.6	14.4	10.2	75.4	24.6	41.8	0.161	-0.172	-0.161	0.172	Angaracris_rhodopa_NC_025946_1	0.0757062	5	2.706	Angaracris_rhodopa_NC_025946	Angaracris_rhodopa_NC_025946	double
3	NC_052731.1	Bryodema kozlovi	Bryodema_kozlovi_NC_052731_1	Insecta	Orthoptera	Acrididae	Bryodema	Arthropoda	F	H	15930	14760	-0.189	0.00659134	43.9	31.5	14.6	10	75.4	24.6	41.5	0.164	-0.189	-0.164	0.189	Bryodema_kozlovi_NC_052731_1	0.0734463	5	2.682	Bryodema_kozlovi_NC_052731	Bryodema_kozlovi_NC_052731	double
3	NC_045057.1	Linepithema humile	Linepithema_humile_NC_045057_1	Insecta	Hymenoptera	Formicidae	Linepithema	Arthropoda	F	H	15929	14730	-0.341	0.0748321	41.3	39.2	13.2	6.3	80.5	19.5	45.5	0.026	-0.357	-0.026	0.357	Linepithema_humile_NC_045057_1	0.0752715	5	4.04	Linepithema_humile_NC_045057	Linepithema_humile_NC_045057	double
3	NC_046553.1	Bryodemacris uvarovi	Bryodemacris_uvarovi_NC_046553_1	Insecta	Orthoptera	Acrididae	Bryodemacris	Arthropoda	F	H	15929	14796	-0.186	0.00433172	43.8	31.5	14.6	10	75.3	24.6	41.5	0.163	-0.185	-0.163	0.185	Bryodemacris_uvarovi_NC_046553_1	0.0711281	5	2.679	Bryodemacris_uvarovi_NC_046553	Bryodemacris_uvarovi_NC_046553	double
3	NC_046536.1	Bryodemella holdereri holdereri	Bryodemella_holdereri_holdereri_NC_046536_1	Insecta	Orthoptera	Acrididae	Bryodemella	Arthropoda	F	H	15929	14771	-0.173	0.00571285	43.8	31.7	14.3	10.1	75.5	24.4	41.8	0.16	-0.172	-0.16	0.172	Bryodemella_holdereri_holdereri_NC_046536_1	0.0726976	5	2.705	Bryodemella_holdereri_holdereri_NC_046536	Bryodemella_holdereri_holdereri_NC_046536	double
3	NC_011200.1	Gampsocleis gratiosa	Gampsocleis_gratiosa_NC_011200_1	Insecta	Orthoptera	Tettigoniidae	Gampsocleis	Arthropoda	F	H	15929	14772	-0.297	0.00288782	34.7	30.6	22.5	12.2	65.3	34.7	42.8	0.062	-0.297	-0.062	0.297	Gampsocleis_gratiosa_NC_011200_1	0.0726348	5	2.442	Gampsocleis_gratiosa_NC_011200	Gampsocleis_gratiosa_NC_011200	double
3	NC_021971.1	Nautilocaris saintlaurentae	Nautilocaris_saintlaurentae_NC_021971_1	Malacostraca	Decapoda	Alvinocarididae	Nautilocaris	Arthropoda	F	I	15928	14757	-0.315	0.0735183	34.8	32.1	21.8	11.3	66.9	33.1	43.4	0.04	-0.315	-0.04	0.315	Nautilocaris_saintlaurentae_NC_021971_1	0.0735183	5	2.514	Nautilocaris_saintlaurentae_NC_021971	Nautilocaris_saintlaurentae_NC_021971	double
4	NC_016926.1	Procambarus clarkii	Procambarus_clarkii_NC_016926_1	Malacostraca	Decapoda	Cambaridae	Procambarus	Arthropoda	F	H	15928	14610	0.302	0.0826846	31.8	41.1	9.5	17.7	72.9	27.2	58.8	-0.127	0.303	0.127	-0.303	Procambarus_clarkii_NC_016926_1	0.0827474	5	2.778	Procambarus_clarkii_NC_016926	Procambarus_clarkii_NC_016926	double
3	NC_003395.1	Bombyx mandarina	Bombyx_mandarina_NC_003395_1	Insecta	Lepidoptera	Bombycidae	Bombyx	Arthropoda	F	H	15928	14742	-0.215	0.0694375	43.1	38.6	11.1	7.2	81.7	18.3	45.8	0.055	-0.213	-0.055	0.213	Bombyx_mandarina_NC_003395_1	0.119852	5	2.699	Bombyx_mandarina_NC_003395	Bombyx_mandarina_NC_003395	double
3	NC_037723.1	Bactrocera ritsemai	Bactrocera_ritsemai_NC_037723_1	Insecta	Diptera	Tephritidae	Bactrocera	Arthropoda	F	H	15927	14752	-0.275	0.0744647	39.3	32.6	17.9	10.2	71.9	28.1	42.8	0.093	-0.274	-0.093	0.274	Bactrocera_ritsemai_NC_037723_1	0.0737741	5	2.427	Bactrocera_ritsemai_NC_037723	Bactrocera_ritsemai_NC_037723	double
3	NC_056270.1	Brevicoryne brassicae	Brevicoryne_brassicae_NC_056270_1	Insecta	Hemiptera	Aphididae	Brevicoryne	Arthropoda	F	I	15927	14536	-0.25	0.0822503	45.2	39	9.9	5.9	84.2	15.8	44.9	0.073	-0.257	-0.073	0.257	Brevicoryne_brassicae_NC_056270_1	0.087336	5	3.926	Brevicoryne_brassicae_NC_056270	Brevicoryne_brassicae_NC_056270	double
5	NC_027830.1	Taeniogonalos taihorina	Taeniogonalos_taihorina_NC_027830_1	Insecta	Hymenoptera	Trigonalidae	Taeniogonalos	Arthropoda	F	H	15927	14672	0.12	0.078797	41.1	43.5	6.8	8.6	84.6	15.4	52.1	-0.029	0.121	0.029	-0.121	Taeniogonalos_taihorina_NC_027830_1	0.078797	5	4.173	Taeniogonalos_taihorina_NC_027830	Taeniogonalos_taihorina_NC_027830	double
3	NC_046554.1	Bryodemella tuberculata diluta	Bryodemella_tuberculata_diluta_NC_046554_1	Insecta	Orthoptera	Acrididae	Bryodemella	Arthropoda	F	H	15927	14795	-0.184	0.00433227	43.7	31.6	14.6	10.1	75.3	24.7	41.7	0.161	-0.184	-0.161	0.184	Bryodemella_tuberculata_diluta_NC_046554_1	0.0710743	5	2.698	Bryodemella_tuberculata_diluta_NC_046554	Bryodemella_tuberculata_diluta_NC_046554	double
3	NC_039153.1	Aristaeomorpha foliacea	Aristaeomorpha_foliacea_NC_039153_1	Malacostraca	Decapoda	Aristeidae	Aristaeomorpha	Arthropoda	F	H	15926	14818	-0.218	0.069509	32.9	33.1	20.6	13.3	66	33.9	46.4	-0.004	-0.215	0.004	0.215	Aristaeomorpha_foliacea_NC_039153_1	0.0695718	5	2.384	Aristaeomorpha_foliacea_NC_039153	Aristaeomorpha_foliacea_NC_039153	double
3	NC_035401.1	Typhlatya iliffei	Typhlatya_iliffei_NC_035401_1	Malacostraca	Decapoda	Atyidae	Typhlatya	Arthropoda	F	I	15926	14629	-0.217	0.0813764	33.3	32	21.1	13.5	65.3	34.6	45.5	0.02	-0.22	-0.02	0.22	Typhlatya_iliffei_NC_035401_1	0.0814392	5	2.665	Typhlatya_iliffei_NC_035401	Typhlatya_iliffei_NC_035401	double
3	NC_039168.1	Sicyonia lancifer	Sicyonia_lancifer_NC_039168_1	Malacostraca	Decapoda	Sicyoniidae	Sicyonia	Arthropoda	F	H	15926	14796	-0.172	0.0709532	32.4	35.5	18.8	13.3	67.9	32.1	48.8	-0.046	-0.173	0.046	0.173	Sicyonia_lancifer_NC_039168_1	0.0709532	5	2.443	Sicyonia_lancifer_NC_039168	Sicyonia_lancifer_NC_039168	double
3	NC_025567.1	Reticulitermes chinensis	Reticulitermes_chinensis_NC_025567_1	Insecta	Blattodea	Rhinotermitidae	Reticulitermes	Arthropoda	F	H	15925	14687	-0.283	0.00709576	42.6	22.7	22.4	12.4	65.3	34.8	35.1	0.304	-0.288	-0.304	0.288	Reticulitermes_chinensis_NC_025567_1	0.0777394	5	2.668	Reticulitermes_chinensis_NC_025567	Reticulitermes_chinensis_NC_025567	double
3	NC_024600.1	Tribolium audax	Tribolium_audax_NC_024600_1	Insecta	Coleoptera	Tenebrionidae	Tribolium	Arthropoda	F	H	15925	14609	-0.28	0.00313972	40.8	32.8	16.8	9.6	73.6	26.4	42.4	0.11	-0.274	-0.11	0.274	Tribolium_audax_NC_024600_1	0.0826374	5	2.618	Tribolium_audax_NC_024600	Tribolium_audax_NC_024600	double
3	NC_039373.1	Palaemon capensis	Palaemon_capensis_NC_039373_1	Malacostraca	Decapoda	Palaemonidae	Palaemon	Arthropoda	F	H	15925	14615	-0.258	0.0813815	36.2	32.9	19.4	11.5	69.1	30.9	44.4	0.048	-0.254	-0.048	0.254	Palaemon_capensis_NC_039373_1	0.0822606	5	2.622	Palaemon_capensis_NC_039373	Palaemon_capensis_NC_039373	double
3	NC_014611.1	Bactrocera tryoni	Bactrocera_tryoni_NC_014611_1	Insecta	Diptera	Tephritidae	Bactrocera	Arthropoda	F	H	15925	14740	-0.23	0.0146939	38.8	33.7	16.9	10.7	72.5	27.6	44.4	0.07	-0.227	-0.07	0.227	Bactrocera_tryoni_NC_014611_1	0.0744113	5	2.41	Bactrocera_tryoni_NC_014611	Bactrocera_tryoni_NC_014611	double
4	NC_024651.1	Paraglypturus tonganus (nomen nudum)	Paraglypturus_tonganus__nomen_nudum__NC_024651_1	Malacostraca	Decapoda	Callianassidae	Paraglypturus	Arthropoda	F	I	15924	14754	0.226	0.0734112	27.4	38.7	13.2	20.7	66.1	33.9	59.4	-0.171	0.221	0.171	-0.221	Paraglypturus_tonganus__nomen_nudum__NC_024651_1	0.073474	5	2.6	Paraglypturus_tonganus__nomen_nudum__NC_024651	Paraglypturus_tonganus__nomen_nudum__NC_024651	double
6	NC_023810.1	Geocharax gracilis	Geocharax_gracilis_NC_023810_1	Malacostraca	Decapoda	Parastacidae	Geocharax	Arthropoda	F	H	15924	14518	-0.342	0.0857197	34.8	32.2	22.3	10.7	67	33	42.9	0.04	-0.353	-0.04	0.353	Geocharax_gracilis_NC_023810_1	0.0882944	5	2.742	Geocharax_gracilis_NC_023810	Geocharax_gracilis_NC_023810	double
3	NC_037172.1	Atergatis integerrimus	Atergatis_integerrimus_NC_037172_1	Malacostraca	Decapoda	Xanthidae	Atergatis	Arthropoda	F	H	15924	14787	-0.313	0.0714017	32.9	35.7	20.9	10.6	68.6	31.5	46.3	-0.041	-0.327	0.041	0.327	Atergatis_integerrimus_NC_037172_1	0.0714017	5	2.724	Atergatis_integerrimus_NC_037172	Atergatis_integerrimus_NC_037172	double
3	NC_044484.1	Limonia phragmitidis	Limonia_phragmitidis_NC_044484_1	Insecta	Diptera	Limoniidae	Limonia	Arthropoda	F	H	15924	14562	-0.153	0.00967094	37.8	37.7	14.2	10.3	75.5	24.5	48	0.001	-0.156	-0.001	0.156	Limonia_phragmitidis_NC_044484_1	0.0855313	5	2.329	Limonia_phragmitidis_NC_044484	Limonia_phragmitidis_NC_044484	double
3	NC_042440.1	Antilochus russus	Antilochus_russus_NC_042440_1	Insecta	Hemiptera	Pyrrhocoridae	Antilochus	Arthropoda	F	H	15924	14531	-0.211	0.00709621	42.9	29.6	16.9	10.7	72.5	27.6	40.3	0.184	-0.224	-0.184	0.224	Antilochus_russus_NC_042440_1	0.087478	5	3.108	Antilochus_russus_NC_042440	Antilochus_russus_NC_042440	double
3	NC_058200.1	Conaspidia wangi	Conaspidia_wangi_NC_058200_1	Insecta	Hymenoptera	Tenthredinidae	Conaspidia	Arthropoda	F	H	15924	14904	-0.215	0.0145064	41.2	39.2	11.9	7.7	80.4	19.6	46.9	0.025	-0.211	-0.025	0.211	Conaspidia_wangi_NC_058200_1	0.0640543	5	2.802	Conaspidia_wangi_NC_058200	Conaspidia_wangi_NC_058200	double
3	NC_046543.1	Bryodema dolichoptera	Bryodema_dolichoptera_NC_046543_1	Insecta	Orthoptera	Acrididae	Bryodema	Arthropoda	F	H	15924	14797	-0.174	0.00389349	43.8	31.7	14.4	10.2	75.5	24.6	41.9	0.16	-0.172	-0.16	0.172	Bryodema_dolichoptera_NC_046543_1	0.0707737	5	2.705	Bryodema_dolichoptera_NC_046543	Bryodema_dolichoptera_NC_046543	double
3	NC_011114.1	Gastrimargus marmoratus	Gastrimargus_marmoratus_NC_011114_1	Insecta	Orthoptera	Acrididae	Gastrimargus	Arthropoda	F	H	15924	14791	-0.221	0.00452148	45.6	29.6	15.2	9.6	75.2	24.8	39.2	0.212	-0.226	-0.212	0.226	Gastrimargus_marmoratus_NC_011114_1	0.0711505	5	2.756	Gastrimargus_marmoratus_NC_011114	Gastrimargus_marmoratus_NC_011114	double
3	NC_035052.1	Nauphoeta cinerea	Nauphoeta_cinerea_NC_035052_1	Insecta	Blattodea	Blaberidae	Nauphoeta	Arthropoda	F	H	15923	14610	-0.197	0.00345412	37.2	34.6	17	11.2	71.8	28.2	45.8	0.036	-0.205	-0.036	0.205	Nauphoeta_cinerea_NC_035052_1	0.0824593	5	2.474	Nauphoeta_cinerea_NC_035052	Nauphoeta_cinerea_NC_035052	double
3	NC_036044.1	Hycleus marcipoli	Hycleus_marcipoli_NC_036044_1	Insecta	Coleoptera	Meloidae	Hycleus	Arthropoda	F	H	15923	14592	-0.268	0.0129373	37.7	34.2	17.8	10.3	71.9	28.1	44.5	0.049	-0.267	-0.049	0.267	Hycleus_marcipoli_NC_036044_1	0.0835898	5	2.711	Hycleus_marcipoli_NC_036044	Hycleus_marcipoli_NC_036044	double
6	NC_005306.1	Vargula hilgendorfii	Vargula_hilgendorfii_NC_005306_1	Ostracoda	Myodocopida	Cypridinidae	Vargula	Arthropoda	F	L	15923	14186	-0.395	0.109087	32.2	29.4	26	12.4	61.6	38.4	41.8	0.045	-0.355	-0.045	0.355	Vargula_hilgendorfii_NC_005306_1	0.109087	5	4	Vargula_hilgendorfii_NC_005306	Vargula_hilgendorfii_NC_005306	double
3	NC_056285.1	Oyamia nigribasis	Oyamia_nigribasis_NC_056285_1	Insecta	Plecoptera	Perlidae	Oyamia	Arthropoda	F	H	15923	14853	-0.264	0.00301451	36.3	33.6	19	11	69.9	30	44.6	0.039	-0.266	-0.039	0.266	Oyamia_nigribasis_NC_056285_1	0.0671984	5	2.431	Oyamia_nigribasis_NC_056285	Oyamia_nigribasis_NC_056285	double
3	NC_037927.1	Dorysthenes paradoxus	Dorysthenes_paradoxus_NC_037927_1	Insecta	Coleoptera	Cerambycidae	Dorysthenes	Arthropoda	F	H	15922	14682	-0.239	0.00376837	39.7	31.5	17.9	11	71.2	28.9	42.5	0.116	-0.238	-0.116	0.238	Dorysthenes_paradoxus_NC_037927_1	0.0778797	5	2.666	Dorysthenes_paradoxus_NC_037927	Dorysthenes_paradoxus_NC_037927	double
3	NC_054368.1	Mirocaris indica	Mirocaris_indica_NC_054368_1	Malacostraca	Decapoda	Alvinocarididae	Mirocaris	Arthropoda	F	I	15922	14439	-0.306	0.0931416	34.7	32.1	21.8	11.4	66.8	33.2	43.5	0.038	-0.312	-0.038	0.312	Mirocaris_indica_NC_054368_1	0.0931416	5	2.524	Mirocaris_indica_NC_054368	Mirocaris_indica_NC_054368	double
4	NC_030277.1	Mierspenaeopsis hardwickii	Mierspenaeopsis_hardwickii_NC_030277_1	Malacostraca	Decapoda	Penaeidae	Mierspenaeopsis	Arthropoda	F	H	15922	14669	-0.272	0.0163924	35	32.2	20.8	12	67.2	32.8	44.2	0.042	-0.27	-0.042	0.27	Mierspenaeopsis_hardwickii_NC_030277_1	0.0787589	5	2.381	Mierspenaeopsis_hardwickii_NC_030277	Mierspenaeopsis_hardwickii_NC_030277	double
3	NC_020463.1	Procecidochares utilis	Procecidochares_utilis_NC_020463_1	Insecta	Diptera	Tephritidae	Procecidochares	Arthropoda	F	H	15922	14794	-0.178	0.0125612	41.9	38.9	11.3	7.9	80.8	19.2	46.8	0.037	-0.175	-0.037	0.175	Procecidochares_utilis_NC_020463_1	0.0708454	5	2.673	Procecidochares_utilis_NC_020463	Procecidochares_utilis_NC_020463	double
3	NC_059811.1	Youtuus erythrus	Youtuus_erythrus_NC_059811_1	Insecta	Hemiptera	Caliscelidae	Youtuus	Arthropoda	F	H	15922	14234	-0.248	0.00496169	46.4	33.3	12.7	7.6	79.7	20.3	40.9	0.164	-0.255	-0.164	0.255	Youtuus_erythrus_NC_059811_1	0.106017	5	3.579	Youtuus_erythrus_NC_059811	Youtuus_erythrus_NC_059811	double
3	NC_051936.1	Platisus angusticollis	Platisus_angusticollis_NC_051936_1	Insecta	Coleoptera	Cucujidae	Platisus	Arthropoda	F	H	15921	14586	-0.304	0.0176496	39.9	34.7	16.6	8.8	74.6	25.4	43.5	0.069	-0.31	-0.069	0.31	Platisus_angusticollis_NC_051936_1	0.0838515	5	2.669	Platisus_angusticollis_NC_051936	Platisus_angusticollis_NC_051936	double
3	NC_042419.1	Reticulitermes leptomandibularis	Reticulitermes_leptomandibularis_NC_042419_1	Insecta	Blattodea	Rhinotermitidae	Reticulitermes	Arthropoda	F	H	15920	14684	-0.28	0.00703518	42.7	22.7	22.3	12.3	65.4	34.6	35	0.307	-0.288	-0.307	0.288	Reticulitermes_leptomandibularis_NC_042419_1	0.0776382	5	2.673	Reticulitermes_leptomandibularis_NC_042419	Reticulitermes_leptomandibularis_NC_042419	double
3	NC_031851.1	Orisarma neglectum	Orisarma_neglectum_NC_031851_1	Malacostraca	Decapoda	Sesarmidae	Orisarma	Arthropoda	F	H	15920	14793	-0.221	0.0707915	37.4	38.2	14.9	9.5	75.6	24.4	47.7	-0.01	-0.219	0.01	0.219	Orisarma_neglectum_NC_031851_1	0.0707915	5	2.64	Orisarma_neglectum_NC_031851	Orisarma_neglectum_NC_031851	double
3	NC_011320.1	Contacyphon sp. BT0012	Contacyphon_sp__BT0012_NC_011320_1	Insecta	Coleoptera	Scirtidae	Contacyphon	Arthropoda	F	H	15919	14669	-0.229	0.0130033	40.3	34.9	15.2	9.6	75.2	24.8	44.5	0.072	-0.228	-0.072	0.228	Contacyphon_sp__BT0012_NC_011320_1	0.0785225	5	2.398	Contacyphon_sp__BT0012_NC_011320	Contacyphon_sp__BT0012_NC_011320	double
3	NC_042815.1	Scotinophara lurida	Scotinophara_lurida_NC_042815_1	Insecta	Hemiptera	Pentatomidae	Scotinophara	Arthropoda	F	H	15919	14597	-0.155	0.00659589	42.6	34.3	13.5	9.7	76.9	23.2	44	0.108	-0.166	-0.108	0.166	Scotinophara_lurida_NC_042815_1	0.0830454	5	3.072	Scotinophara_lurida_NC_042815	Scotinophara_lurida_NC_042815	double
3	NC_039167.1	Sicyonia japonica	Sicyonia_japonica_NC_039167_1	Malacostraca	Decapoda	Sicyoniidae	Sicyonia	Arthropoda	F	H	15918	14792	-0.202	0.0707375	33.9	36.5	17.8	11.8	70.4	29.6	48.3	-0.037	-0.202	0.037	0.202	Sicyonia_japonica_NC_039167_1	0.0707375	5	2.452	Sicyonia_japonica_NC_039167	Sicyonia_japonica_NC_039167	double
3	NC_056796.1	Megabeleses magnoliae	Megabeleses_magnoliae_NC_056796_1	Insecta	Hymenoptera	Tenthredinidae	Megabeleses	Arthropoda	F	H	15918	14946	-0.2	0.0547179	42.2	39.5	11	7.4	81.7	18.4	46.9	0.033	-0.194	-0.033	0.194	Megabeleses_magnoliae_NC_056796_1	0.0610629	5	2.905	Megabeleses_magnoliae_NC_056796	Megabeleses_magnoliae_NC_056796	double
3	NC_028332.1	Agasicles hygrophila	Agasicles_hygrophila_NC_028332_1	Insecta	Coleoptera	Chrysomelidae	Agasicles	Arthropoda	F	H	15917	14552	-0.191	0.00188478	39.4	35.8	14.8	10.1	75.2	24.9	45.9	0.048	-0.188	-0.048	0.188	Agasicles_hygrophila_NC_028332_1	0.0857574	5	2.823	Agasicles_hygrophila_NC_028332	Agasicles_hygrophila_NC_028332	double
3	NC_039170.1	Gennadas parvus	Gennadas_parvus_NC_039170_1	Malacostraca	Decapoda	Benthesicymidae	Gennadas	Arthropoda	F	I	15917	14817	-0.169	0.0689828	29.7	33.9	21.2	15.2	63.6	36.4	49.1	-0.065	-0.166	0.065	0.166	Gennadas_parvus_NC_039170_1	0.0691085	5	2.415	Gennadas_parvus_NC_039170	Gennadas_parvus_NC_039170	double
6	NC_022938.1	Cherax monticola	Cherax_monticola_NC_022938_1	Malacostraca	Decapoda	Parastacidae	Cherax	Arthropoda	F	H	15917	14629	-0.302	0.0807313	33.7	33.5	21.5	11.4	67.2	32.9	44.9	0.004	-0.308	-0.004	0.308	Cherax_monticola_NC_022938_1	0.0808569	5	2.845	Cherax_monticola_NC_022938	Cherax_monticola_NC_022938	double
3	NC_041212.1	Orisarma dehaani	Orisarma_dehaani_NC_041212_1	Malacostraca	Decapoda	Sesarmidae	Orisarma	Arthropoda	F	H	15917	14793	-0.222	0.0706163	37.5	38.2	14.8	9.5	75.7	24.3	47.7	-0.01	-0.22	0.01	0.22	Orisarma_dehaani_NC_041212_1	0.0706163	5	2.638	Orisarma_dehaani_NC_041212	Orisarma_dehaani_NC_041212	double
3	NC_039172.1	Gordonella aff. paravillosa ZS-2018	Gordonella_aff__paravillosa_ZS_2018_NC_039172_1	Malacostraca	Decapoda	Solenoceridae	Gordonella	Arthropoda	F	H	15916	14833	-0.235	0.0678562	34.4	34.4	19.2	12	68.8	31.2	46.4	0	-0.232	0	0.232	Gordonella_aff__paravillosa_ZS_2018_NC_039172_1	0.0680447	5	2.374	Gordonella_aff__paravillosa_ZS_2018_NC_039172	Gordonella_aff__paravillosa_ZS_2018_NC_039172	double
4	NC_037155.1	Varuna yui	Varuna_yui_NC_037155_1	Malacostraca	Decapoda	Varunidae	Varuna	Arthropoda	F	H	15915	14783	-0.262	0.0705624	35.7	36.5	17.6	10.2	72.2	27.8	46.7	-0.011	-0.265	0.011	0.265	Varuna_yui_NC_037155_1	0.0711279	5	2.716	Varuna_yui_NC_037155	Varuna_yui_NC_037155	double
3	NC_009772.1	Bactrocera carambolae	Bactrocera_carambolae_NC_009772_1	Insecta	Diptera	Tephritidae	Bactrocera	Arthropoda	F	H	15915	14737	-0.226	0.0143261	39.2	34.4	16.2	10.3	73.6	26.5	44.7	0.066	-0.224	-0.066	0.224	Bactrocera_carambolae_NC_009772_1	0.0740182	5	2.413	Bactrocera_carambolae_NC_009772	Bactrocera_carambolae_NC_009772	double
3	NC_053983.1	Bactrocera thailandica	Bactrocera_thailandica_NC_053983_1	Insecta	Diptera	Tephritidae	Bactrocera	Arthropoda	F	H	15915	14765	-0.223	0.0127553	39.2	34.4	16.1	10.3	73.6	26.4	44.7	0.065	-0.223	-0.065	0.223	Bactrocera_thailandica_NC_053983_1	0.0722589	5	2.411	Bactrocera_thailandica_NC_053983	Bactrocera_thailandica_NC_053983	double
3	NC_008748.1	Bactrocera dorsalis	Bactrocera_dorsalis_NC_008748_1	Insecta	Diptera	Tephritidae	Bactrocera	Arthropoda	F	H	15915	14748	-0.228	0.0136978	39.3	34.3	16.2	10.2	73.6	26.4	44.5	0.068	-0.228	-0.068	0.228	Bactrocera_dorsalis_NC_008748_1	0.0733271	5	2.414	Bactrocera_dorsalis_NC_008748	Bactrocera_dorsalis_NC_008748	double
3	NC_027254.1	Zeugodacus scutellatus	Zeugodacus_scutellatus_NC_027254_1	Insecta	Diptera	Tephritidae	Zeugodacus	Arthropoda	F	H	15915	14763	-0.256	0.00885957	39	33.6	16.9	10	72.6	26.9	43.6	0.074	-0.257	-0.074	0.257	Zeugodacus_scutellatus_NC_027254_1	0.0723845	5	2.396	Zeugodacus_scutellatus_NC_027254	Zeugodacus_scutellatus_NC_027254	double
3	NC_053853.1	Togoperla limbata	Togoperla_limbata_NC_053853_1	Insecta	Plecoptera	Perlidae	Togoperla	Arthropoda	F	H	15915	14864	-0.305	0.00364436	33.5	30.2	23.7	12.6	63.7	36.3	42.8	0.052	-0.306	-0.052	0.306	Togoperla_limbata_NC_053853_1	0.0660383	5	2.422	Togoperla_limbata_NC_053853	Togoperla_limbata_NC_053853	double
3	NC_030262.1	Reticulitermes labralis	Reticulitermes_labralis_NC_030262_1	Insecta	Blattodea	Rhinotermitidae	Reticulitermes	Arthropoda	F	H	15914	14686	-0.275	0.00735202	42.4	22.7	22.4	12.5	65.1	34.9	35.2	0.303	-0.282	-0.303	0.282	Reticulitermes_labralis_NC_030262_1	0.0771648	5	2.664	Reticulitermes_labralis_NC_030262	Reticulitermes_labralis_NC_030262	double
3	NC_053728.1	Reticulitermes ovatilabrum	Reticulitermes_ovatilabrum_NC_053728_1	Insecta	Blattodea	Rhinotermitidae	Reticulitermes	Arthropoda	F	H	15913	14687	-0.276	0.00772953	42.5	23.1	22.1	12.3	65.6	34.4	35.4	0.296	-0.282	-0.296	0.282	Reticulitermes_ovatilabrum_NC_053728_1	0.0770439	5	2.727	Reticulitermes_ovatilabrum_NC_053728	Reticulitermes_ovatilabrum_NC_053728	double
3	NC_060621.1	Charybdis hellerii	Charybdis_hellerii_NC_060621_1	Malacostraca	Decapoda	Portunidae	Charybdis	Arthropoda	F	H	15913	14783	-0.247	0.0710111	33.8	36.4	18.7	11.1	70.2	29.8	47.5	-0.038	-0.252	0.038	0.252	Charybdis_hellerii_NC_060621_1	0.0710111	5	2.788	Charybdis_hellerii_NC_060621	Charybdis_hellerii_NC_060621	double
3	NC_012644.1	Davidius lunatus	Davidius_lunatus_NC_012644_1	Insecta	Odonata	Gomphidae	Davidius	Arthropoda	F	H	15913	14719	-0.194	0.00804374	39.5	30.6	17.8	12.1	70.1	29.9	42.7	0.126	-0.189	-0.126	0.189	Davidius_lunatus_NC_012644_1	0.075033	5	2.565	Davidius_lunatus_NC_012644	Davidius_lunatus_NC_012644	double
3	NC_037498.1	Sabethes belisarioi	Sabethes_belisarioi_NC_037498_1	Insecta	Diptera	Culicidae	Sabethes	Arthropoda	MP	H	15911	14660	-0.179	0.0401609	39.6	41.1	11.4	7.8	80.7	19.2	48.9	-0.019	-0.186	0.019	0.186	Sabethes_belisarioi_NC_037498_1	0.0786249	5	2.57	Sabethes_belisarioi_NC_037498	Sabethes_belisarioi_NC_037498	double
3	NC_039948.1	Suhpalacsa longialata	Suhpalacsa_longialata_NC_039948_1	Insecta	Neuroptera	Ascalaphidae	Suhpalacsa	Arthropoda	F	H	15911	14683	-0.231	0.00879894	41	33.8	15.5	9.7	74.8	25.2	43.5	0.097	-0.23	-0.097	0.23	Suhpalacsa_longialata_NC_039948_1	0.0771793	5	2.343	Suhpalacsa_longialata_NC_039948	Suhpalacsa_longialata_NC_039948	double
3	NC_059770.1	Trictenotoma davidi	Trictenotoma_davidi_NC_059770_1	Insecta	Coleoptera	Trictenotomidae	Trictenotoma	Arthropoda	F	H	15910	14553	-0.255	0.00421119	39.9	36	15.1	9	75.9	24.1	45	0.052	-0.252	-0.052	0.252	Trictenotoma_davidi_NC_059770_1	0.0852923	5	2.54	Trictenotoma_davidi_NC_059770	Trictenotoma_davidi_NC_059770	double
3	NC_018778.1	Alvinocaris chelys	Alvinocaris_chelys_NC_018778_1	Malacostraca	Decapoda	Alvinocarididae	Alvinocaris	Arthropoda	F	I	15910	14720	-0.349	0.0747957	33.8	29.6	24.7	11.9	63.4	36.6	41.5	0.067	-0.351	-0.067	0.351	Alvinocaris_chelys_NC_018778_1	0.0747957	5	2.515	Alvinocaris_chelys_NC_018778	Alvinocaris_chelys_NC_018778	double
3	NC_050325.1	Triatoma huehuetenanguensis	Triatoma_huehuetenanguensis_NC_050325_1	Insecta	Hemiptera	Reduviidae	Triatoma	Arthropoda	MP	H	15910	14494	-0.245	0.0281584	40.6	30.2	18.3	11	70.8	29.3	41.2	0.147	-0.25	-0.147	0.25	Triatoma_huehuetenanguensis_NC_050325_1	0.0890006	5	2.863	Triatoma_huehuetenanguensis_NC_050325	Triatoma_huehuetenanguensis_NC_050325	double
3	NC_051948.1	Chorocaris paulexa	Chorocaris_paulexa_NC_051948_1	Malacostraca	Decapoda	Alvinocarididae	Chorocaris	Arthropoda	F	I	15909	14780	-0.33	0.0709661	34.4	31.3	22.9	11.4	65.7	34.3	42.7	0.047	-0.336	-0.047	0.336	Chorocaris_paulexa_NC_051948_1	0.0709661	5	2.477	Chorocaris_paulexa_NC_051948	Chorocaris_paulexa_NC_051948	double
3	NC_038166.1	Spongiocaris panglao	Spongiocaris_panglao_NC_038166_1	Malacostraca	Decapoda	Spongicolidae	Spongiocaris	Arthropoda	F	H	15909	14800	-0.239	0.069269	37.7	39.7	14	8.6	77.4	22.6	48.3	-0.026	-0.241	0.026	0.241	Spongiocaris_panglao_NC_038166_1	0.069709	5	2.616	Spongiocaris_panglao_NC_038166	Spongiocaris_panglao_NC_038166	double
3	NC_053930.1	Melanotus cribricollis	Melanotus_cribricollis_NC_053930_1	Insecta	Coleoptera	Elateridae	Melanotus	Arthropoda	F	H	15908	14592	-0.264	0.00220015	40.8	31.5	17.4	10.3	72.3	27.7	41.8	0.129	-0.259	-0.129	0.259	Melanotus_cribricollis_NC_053930_1	0.0827257	5	2.523	Melanotus_cribricollis_NC_053930	Melanotus_cribricollis_NC_053930	double
3	NC_043846.1	Rhodnius pictipes	Rhodnius_pictipes_NC_043846_1	Insecta	Hemiptera	Reduviidae	Rhodnius	Arthropoda	MP	H	15908	14503	-0.231	0.00936636	40.4	31	17.7	10.9	71.4	28.6	41.9	0.132	-0.238	-0.132	0.238	Rhodnius_pictipes_NC_043846_1	0.0883203	5	2.863	Rhodnius_pictipes_NC_043846	Rhodnius_pictipes_NC_043846	double
3	NC_044410.1	Gammarus pisinnus	Gammarus_pisinnus_NC_044410_1	Malacostraca	Amphipoda	Gammaridae	Gammarus	Arthropoda	F	I	15907	14041	-0.312	0.030804	32.6	37.4	19.6	10.3	70	29.9	47.7	-0.068	-0.31	0.068	0.31	Gammarus_pisinnus_NC_044410_1	0.117307	5	3.503	Gammarus_pisinnus_NC_044410	Gammarus_pisinnus_NC_044410	double
3	NC_052907.1	Ferdinandea cuprea	Ferdinandea_cuprea_NC_052907_1	Insecta	Diptera	Syrphidae	Ferdinandea	Arthropoda	F	H	15907	14781	-0.178	0.011693	40.7	38.9	12.1	8.4	79.6	20.5	47.3	0.022	-0.181	-0.022	0.181	Ferdinandea_cuprea_NC_052907_1	0.0707864	5	2.421	Ferdinandea_cuprea_NC_052907	Ferdinandea_cuprea_NC_052907	double
3	NC_042813.1	Plautia fimbriata	Plautia_fimbriata_NC_042813_1	Insecta	Hemiptera	Pentatomidae	Plautia	Arthropoda	F	H	15907	14576	-0.147	0.0067266	42.3	32.7	14.4	10.6	75	25	43.3	0.128	-0.151	-0.128	0.151	Plautia_fimbriata_NC_042813_1	0.0836739	5	3.029	Plautia_fimbriata_NC_042813	Plautia_fimbriata_NC_042813	double
3	NC_053854.1	Gonodactylaceus randalli	Gonodactylaceus_randalli_NC_053854_1	Malacostraca	Stomatopoda	Gonodactylidae	Gonodactylaceus	Arthropoda	F	H	15907	14792	-0.13	0.0700321	33.2	33	19.1	14.7	66.2	33.8	47.7	0.003	-0.131	-0.003	0.131	Gonodactylaceus_randalli_NC_053854_1	0.0700949	5	2.447	Gonodactylaceus_randalli_NC_053854	Gonodactylaceus_randalli_NC_053854	double
3	NC_020311.1	Opaepele loihi	Opaepele_loihi_NC_020311_1	Malacostraca	Decapoda	Alvinocarididae	Opaepele	Arthropoda	F	I	15905	14758	-0.309	0.0721157	34	31.6	22.6	11.7	65.6	34.3	43.3	0.037	-0.316	-0.037	0.316	Opaepele_loihi_NC_020311_1	0.0721157	5	2.49	Opaepele_loihi_NC_020311	Opaepele_loihi_NC_020311	double
3	NC_030196.1	Orisarma sinense	Orisarma_sinense_NC_030196_1	Malacostraca	Decapoda	Sesarmidae	Orisarma	Arthropoda	F	H	15905	14446	-0.223	0.0917322	37.4	38.3	14.9	9.4	75.7	24.3	47.7	-0.012	-0.228	0.012	0.228	Orisarma_sinense_NC_030196_1	0.0917322	5	2.649	Orisarma_sinense_NC_030196	Orisarma_sinense_NC_030196	double
3	NC_039169.1	Hymenopenaeus neptunus	Hymenopenaeus_neptunus_NC_039169_1	Malacostraca	Decapoda	Solenoceridae	Hymenopenaeus	Arthropoda	F	H	15905	14831	-0.228	0.0673373	34.7	34.1	19.2	12	68.8	31.2	46.1	0.009	-0.229	-0.009	0.229	Hymenopenaeus_neptunus_NC_039169_1	0.0675259	5	2.382	Hymenopenaeus_neptunus_NC_039169	Hymenopenaeus_neptunus_NC_039169	double
3	NC_045065.1	Conocephalus maculatus	Conocephalus_maculatus_NC_045065_1	Insecta	Orthoptera	Tettigoniidae	Conocephalus	Arthropoda	F	H	15905	14725	-0.192	0.0587237	37.6	34.6	16.5	11.2	72.2	27.7	45.8	0.041	-0.189	-0.041	0.189	Conocephalus_maculatus_NC_045065_1	0.0741905	5	2.382	Conocephalus_maculatus_NC_045065	Conocephalus_maculatus_NC_045065	double
6	NC_030514.1	Cherax sp. HMG-2016	Cherax_sp__HMG_2016_NC_030514_1	Malacostraca	Decapoda	Parastacidae	Cherax	Arthropoda	F	H	15904	14657	-0.321	0.0779049	33.4	33.7	21.7	11.2	67.1	32.9	44.9	-0.005	-0.32	0.005	0.32	Cherax_sp__HMG_2016_NC_030514_1	0.0783451	5	2.829	Cherax_sp__HMG_2016_NC_030514	Cherax_sp__HMG_2016_NC_030514	double
3	NC_029753.1	Simulium aureohirtum	Simulium_aureohirtum_NC_029753_1	Insecta	Diptera	Simuliidae	Simulium	Arthropoda	MP	H	15904	14806	-0.165	0.00999749	39.1	35.7	14.7	10.4	74.8	25.1	46.1	0.045	-0.169	-0.045	0.169	Simulium_aureohirtum_NC_029753_1	0.0690392	5	2.321	Simulium_aureohirtum_NC_029753	Simulium_aureohirtum_NC_029753	double
3	NC_045238.1	Abrus expansivus	Abrus_expansivus_NC_045238_1	Insecta	Hemiptera	Cicadellidae	Abrus	Arthropoda	F	H	15904	14303	-0.144	0.00352113	40.9	33.8	14.4	10.8	74.7	25.2	44.6	0.095	-0.144	-0.095	0.144	Abrus_expansivus_NC_045238_1	0.100666	5	3.365	Abrus_expansivus_NC_045238	Abrus_expansivus_NC_045238	double
3	NC_037738.1	Velinus nodipes	Velinus_nodipes_NC_037738_1	Insecta	Hemiptera	Reduviidae	Velinus	Arthropoda	F	H	15904	14523	-0.136	0.0197435	41.1	32.1	15.3	11.5	73.2	26.8	43.6	0.123	-0.141	-0.123	0.141	Velinus_nodipes_NC_037738_1	0.0868335	5	3.064	Velinus_nodipes_NC_037738	Velinus_nodipes_NC_037738	double
3	NC_057259.1	Physosmaragdina nigrifrons	Physosmaragdina_nigrifrons_NC_057259_1	Insecta	Coleoptera	Chrysomelidae	Physosmaragdina	Arthropoda	F	H	15903	14498	-0.195	0.0110671	38.2	35.2	16	10.6	73.4	26.6	45.8	0.04	-0.202	-0.04	0.202	Physosmaragdina_nigrifrons_NC_057259_1	0.0883481	5	2.719	Physosmaragdina_nigrifrons_NC_057259	Physosmaragdina_nigrifrons_NC_057259	double
3	NC_037487.1	Shinkaicaris leurokolos	Shinkaicaris_leurokolos_NC_037487_1	Malacostraca	Decapoda	Alvinocarididae	Shinkaicaris	Arthropoda	F	I	15903	14737	-0.333	0.0733195	34.5	31.4	22.8	11.3	65.9	34.1	42.7	0.047	-0.339	-0.047	0.339	Shinkaicaris_leurokolos_NC_037487_1	0.0733195	5	2.476	Shinkaicaris_leurokolos_NC_037487	Shinkaicaris_leurokolos_NC_037487	double
3	NC_029361.1	Moloha majora	Moloha_majora_NC_029361_1	Malacostraca	Decapoda	Homolidae	Moloha	Arthropoda	F	I	15903	14734	-0.245	0.0735081	38.4	35.5	16.3	9.8	73.9	26.1	45.3	0.039	-0.249	-0.039	0.249	Moloha_majora_NC_029361_1	0.0735081	5	2.625	Moloha_majora_NC_029361	Moloha_majora_NC_029361	double
3	NC_027116.1	Rimicaris exoculata	Rimicaris_exoculata_NC_027116_1	Malacostraca	Decapoda	Alvinocarididae	Rimicaris	Arthropoda	F	I	15902	14731	-0.328	0.0735128	34.3	31.3	22.9	11.4	65.6	34.3	42.7	0.045	-0.334	-0.045	0.334	Rimicaris_exoculata_NC_027116_1	0.0736385	5	2.479	Rimicaris_exoculata_NC_027116	Rimicaris_exoculata_NC_027116	double
3	NC_046561.1	Pedopodisma emeiensis	Pedopodisma_emeiensis_NC_046561_1	Insecta	Orthoptera	Acrididae	Pedopodisma	Arthropoda	F	H	15902	14791	-0.121	0.00572255	42.9	33.6	13.1	10.4	76.5	23.5	44	0.122	-0.116	-0.122	0.116	Pedopodisma_emeiensis_NC_046561_1	0.0698654	5	2.656	Pedopodisma_emeiensis_NC_046561	Pedopodisma_emeiensis_NC_046561	double
3	NC_020310.1	Rimicaris kairei	Rimicaris_kairei_NC_020310_1	Malacostraca	Decapoda	Alvinocarididae	Rimicaris	Arthropoda	F	I	15900	14731	-0.332	0.0733962	34.5	31.3	22.9	11.3	65.8	34.2	42.6	0.048	-0.337	-0.048	0.337	Rimicaris_kairei_NC_020310_1	0.073522	5	2.478	Rimicaris_kairei_NC_020310	Rimicaris_kairei_NC_020310	double
3	NC_028327.1	Bactrocera arecae	Bactrocera_arecae_NC_028327_1	Insecta	Diptera	Tephritidae	Bactrocera	Arthropoda	F	H	15900	14729	-0.261	0.0137736	39.1	33.2	17.5	10.3	72.3	27.8	43.5	0.081	-0.259	-0.081	0.259	Bactrocera_arecae_NC_028327_1	0.0736478	5	2.413	Bactrocera_arecae_NC_028327	Bactrocera_arecae_NC_028327	double
3	NC_036295.1	Cyclorhipidion bodoanus	Cyclorhipidion_bodoanus_NC_036295_1	Insecta	Coleoptera	Curculionidae	Cyclorhipidion	Arthropoda	F	H	15899	14465	-0.27	0.0631486	40.2	32.3	17.4	10.1	72.5	27.5	42.4	0.11	-0.266	-0.11	0.266	Cyclorhipidion_bodoanus_NC_036295_1	0.0901944	5	3.162	Cyclorhipidion_bodoanus_NC_036295	Cyclorhipidion_bodoanus_NC_036295	double
3	NC_042142.1	Chiromantes haematocheir	Chiromantes_haematocheir_NC_042142_1	Malacostraca	Decapoda	Sesarmidae	Chiromantes	Arthropoda	F	H	15899	14795	-0.222	0.0694383	37.3	38.3	15	9.4	75.6	24.4	47.7	-0.013	-0.226	0.013	0.226	Chiromantes_haematocheir_NC_042142_1	0.0694383	5	2.655	Chiromantes_haematocheir_NC_042142	Chiromantes_haematocheir_NC_042142	double
3	NC_039773.1	Euclimacia badia	Euclimacia_badia_NC_039773_1	Insecta	Neuroptera	Mantispidae	Euclimacia	Arthropoda	F	H	15899	14665	-0.149	0.00893138	40.4	39.9	11.4	8.3	80.3	19.7	48.2	0.006	-0.155	-0.006	0.155	Euclimacia_badia_NC_039773_1	0.0776149	5	2.38	Euclimacia_badia_NC_039773	Euclimacia_badia_NC_039773	double
3	NC_033993.1	Holochlora fruhstorferi	Holochlora_fruhstorferi_NC_033993_1	Insecta	Orthoptera	Tettigoniidae	Holochlora	Arthropoda	F	H	15899	14709	-0.301	0.0718284	35	35.2	19.7	10.1	70.2	29.8	45.3	-0.003	-0.322	0.003	0.322	Holochlora_fruhstorferi_NC_033993_1	0.0748475	5	2.522	Holochlora_fruhstorferi_NC_033993	Holochlora_fruhstorferi_NC_033993	double
3	NC_029468.1	Bactrocera umbrosa	Bactrocera_umbrosa_NC_029468_1	Insecta	Diptera	Tephritidae	Bactrocera	Arthropoda	F	H	15898	14743	-0.247	0.0132721	38.2	32.3	18.4	11.2	70.5	29.6	43.5	0.084	-0.244	-0.084	0.244	Bactrocera_umbrosa_NC_029468_1	0.0726506	5	2.436	Bactrocera_umbrosa_NC_029468	Bactrocera_umbrosa_NC_029468	double
[truncated: 9,672 more rows]

## Sheet: Worksheet S2
brms	Row.names	Covariate	Estimate	Est.Error	l-95% CI	u-95% CI	Estimates (R2)	Est.Error (R2)	Q2.5	Q97.5	Dataset	Flag
[truncated: 68 more rows]

[truncated: 1 more sheets: Worksheet S3]
